# Supplementary material for: DNA Metabarcoding Reveals Broad Presence of Plant Pathogenic Oomycetes in Soil From Internationally Traded Plants
Source: Front Microbiol. 2021 Mar 25;12:637068. doi: 10.3389/fmicb.2021.637068 (PMC8027490; doi:10.3389/fmicb.2021.637068)
Supplement: Supplementary Table 1 — Overview of all rhizospheric soil samples, whether they yielded DNA and sufficient PCR amplicons for sequencing, the read counts through the processing and associated metadata. The metadata for each numbered soil sample includes the countries from which the samples were imported, which plant species the soil was imported with and processing notes when samples were discarded. Sheet 2 contains information on the species used as positive controls and whether they were found in sequencing. [file Table_1.xlsx]

## Sheet: Sample overview
SampleIDs	Soil	Comment	Sampling	Sequencing run	Exporting country	Sample type	Region of entry in Norway	Plants in sample batch
01A-OITS1	S01		Before enrichment	Samples 1-20	NL	Attached to root	East	Acer sp., Populus sp., Fraxinus sp., Carya ovata, Prunus serrulata ‘Amanogawa’, Cladrastis kentukea
01B-OITS1	S01		After enrichment	Samples 1-20	NL	Attached to root	East	Acer sp., Populus sp., Fraxinus sp., Carya ovata, Prunus serrulata ‘Amanogawa’, Cladrastis kentukea
02A-OITS1	S02		Before enrichment	Samples 1-20	NL	Attached to root	East	Fagus syltavica
02B-OITS1	S02		After enrichment	Samples 1-20	NL	Attached to root	East	Fagus syltavica
03A-OITS1	S03		Before enrichment	Samples 1-20	NL	Debris	East	Debris
03B-OITS1	S03		After enrichment	Samples 1-20	NL	Debris	East	Debris
04A-OITS1	S04		Before enrichment	Samples 1-20	NL	Attached to root	South and West	Acer sp., Alnus sp., Betula sp., Carpinus sp., Fagus sp., Quercus sp.
04B-OITS1	S04		After enrichment	Samples 1-20	NL	Attached to root	South and West	Acer sp., Alnus sp., Betula sp., Carpinus sp., Fagus sp., Quercus sp.
05A-OITS1	S05		Before enrichment	Samples 1-20	NL	Attached to root	South and West	Prunus sp.
05B-OITS1	S05		After enrichment	Samples 1-20	NL	Attached to root	South and West	Prunus sp.
06A-OITS1	S06		Before enrichment	Samples 1-20	DK	Attached to root	South and West	Fagus sylvatica, Carpinus betulus
06B-OITS1	S06		After enrichment	Samples 1-20	DK	Attached to root	South and West	Fagus sylvatica, Carpinus betulus
07A-OITS1	S07		Before enrichment	Samples 1-20	NL	Attached to root	South and West	Thuja occidentalis ‘Brabant’
07B-OITS1	S07		After enrichment	Samples 1-20	NL	Attached to root	South and West	Thuja occidentalis ‘Brabant’
08A-OITS1	S08		Before enrichment	Samples 1-20	NL	Attached to root	Greater Oslo	Prunus serrulata ‘Kiku-shidare-zakura’, P. x eminens ‘Umbraculifera’
08B-OITS1	S08		After enrichment	Samples 1-20	NL	Attached to root	Greater Oslo	Prunus serrulata ‘Kiku-shidare-zakura’, P. x eminens ‘Umbraculifera’
09A-OITS1	S09	Not sequenced, unsuccessful PCR	Before enrichment	x	NL	Attached to root	Greater Oslo	Larix kaempferi ‘Diana’, L. k. ‘Grey pearl’, L. k. ‘Stiff weeper’
09B-OITS1	S09		After enrichment	Samples 1-20	NL	Attached to root	Greater Oslo	Larix kaempferi ‘Diana’, L. k. ‘Grey pearl’, L. k. ‘Stiff weeper’
10A-OITS1	S10	Discarded, too few reads	Before enrichment	Samples 1-20	NL	Attached to root	East	Taxus x media
10B-OITS1	S10		After enrichment	Samples 1-20	NL	Attached to root	East	Taxus x media
11A-OITS1	S11		Before enrichment	Samples 1-20	DE	Attached to root	Greater Oslo	Syringa spp.
11B-OITS1	S11		After enrichment	Samples 1-20	DE	Attached to root	Greater Oslo	Syringa spp.
12A-OITS1	S12	Discarded, too few reads	Before enrichment	Samples 1-20	NL	Attached to root	Greater Oslo	Taxus spp., Ilex spp.
12B-OITS1	S12		After enrichment	Samples 1-20	NL	Attached to root	Greater Oslo	Taxus spp., Ilex spp.
13A-OITS1	S13		Before enrichment	Samples 1-20	IT via DK	Attached to root	Greater Oslo	Fagus sp., Acer sp. Carpinus sp., Quercus sp.
13B-OITS1	S13		After enrichment	Samples 1-20	IT via DK	Attached to root	Greater Oslo	Fagus sp., Acer sp. Carpinus sp., Quercus sp.
14A-OITS1	S14		Before enrichment	Samples 1-20	NL	Attached to root	Greater Oslo	Quercus sp.
14B-OITS1	S14		After enrichment	Samples 1-20	NL	Attached to root	Greater Oslo	Quercus sp.
15A-OITS1	S15		Before enrichment	Samples 1-20	NL	Attached to root	Greater Oslo	Tsuga sp., Taxus sp.
15B-OITS1	S15		After enrichment	Samples 1-20	NL	Attached to root	Greater Oslo	Tsuga sp., Taxus sp.
16A-OITS1	S16		Before enrichment	Samples 1-20	NL	Attached to root	South and West	Acer sp., Platanus sp., Prunus sp.
16B-OITS1	S16		After enrichment	Samples 1-20	NL	Attached to root	South and West	Acer sp., Platanus sp., Prunus sp.
17A-OITS1	x17	Discarded, too few reads	Before enrichment	Samples 1-20	NL	Attached to root	South and West	Thuja occidentalis
17B-OITS1	x17	Discarded, too few reads	After enrichment	Samples 1-20	NL	Attached to root	South and West	Thuja occidentalis
18A-OITS1	S17		Before enrichment	Samples 1-20	NL	Attached to root	South and West	Pinus sp.
18B-OITS1	S17	Discarded, too few reads	After enrichment	Samples 1-20	NL	Attached to root	South and West	Pinus sp.
19A-OITS1	S18		Before enrichment	Samples 1-20	NL	Attached to root	Stor-Oslo	Thuja occidentalis ’Brabant’
19B-OITS1	S18	Discarded, too few reads	After enrichment	Samples 1-20	NL	Attached to root	Stor-Oslo	Thuja occidentalis ’Brabant’
20A-OITS1	S19		Before enrichment	Samples 1-20	NL	Attached to root	South and West	Syringa sp.
20B-OITS1	S19		After enrichment	Samples 1-20	NL	Attached to root	South and West	Syringa sp.
21A-OITS1	S20		Before enrichment	Samples 21-69	NL	Attached to root	South and West	Thuja occidentalis ’Brabant’
21B-OITS1	S20		After enrichment	Samples 21-69	NL	Attached to root	South and West	Thuja occidentalis ’Brabant’
22A-OITS1	S21		Before enrichment	Samples 21-69	NL	Attached to root	Greater Oslo	Acer platanoides ‘Globosum’
22B-OITS1	S21		After enrichment	Samples 21-69	NL	Attached to root	Greater Oslo	Acer platanoides ‘Globosum’
23A-OITS1	x	Not sequenced, unsuccessful PCR	Before enrichment	x	NL	Attached to root	Greater Oslo	Ilex meservae 'Blue Prince'
23A-OITS1	x	Not sequenced, unsuccessful PCR	After enrichment	x	NL	Attached to root	Greater Oslo	Ilex meservae 'Blue Prince'
24A-OITS1	S22		Before enrichment	Samples 21-69	NL	Attached to root	Greater Oslo	Picea omorica ‘Pendula’
24B-OITS1	S22		After enrichment	Samples 21-69	NL	Attached to root	Greater Oslo	Picea omorica ‘Pendula’
25A-OITS1	S23		Before enrichment	Samples 21-69	DK	Attached to root	South and West	Betula sp.
25B-OITS1	S23		After enrichment	Samples 21-69	DK	Attached to root	South and West	Betula sp.
26A-OITS1	S24		Before enrichment	Samples 21-69	NL	Attached to root	Greater Oslo	Taxus sp.
26B-OITS1	S24		After enrichment	Samples 21-69	NL	Attached to root	Greater Oslo	Taxus sp.
27A-OITS1	S25		Before enrichment	Samples 21-69	DE	Attached to root	East	Taxus sp., Tsuga sp., Juniperus sp.
27B-OITS1	S25		After enrichment	Samples 21-69	DE	Attached to root	East	Taxus sp., Tsuga sp., Juniperus sp.
28A-OITS1	S26		Before enrichment	Samples 21-69	IT via DK	Attached to root	East	Prunus sp., Betula sp., Gleditsia sp., Phoenix sp., Chamaerops spp., Pinus sp., Juniperus sp., Acer palmatum
28B-OITS1	S26		After enrichment	Samples 21-69	IT via DK	Attached to root	East	Prunus sp., Betula sp., Gleditsia sp., Phoenix sp., Chamaerops spp., Pinus sp., Juniperus sp., Acer palmatum
29A-OITS1	x	Not sequenced, unsuccessful PCR	Before enrichment	x	NL	Attached to root	South and West	Thuja sp.
29B-OITS1	S27		After enrichment	Samples 21-69	NL	Attached to root	South and West	Thuja sp.
30A-OITS1	S28		Before enrichment	Samples 21-69	NL	Attached to root	East	Pinus sylvestris
30B-OITS1	S28		After enrichment	Samples 21-69	NL	Attached to root	East	Pinus sylvestris
31A-OITS1	S29		Before enrichment	Samples 21-69	NL	Attached to root	South and West	Acer sp.
31B-OITS1	S29		After enrichment	Samples 21-69	NL	Attached to root	South and West	Acer sp.
32A-OITS1	x	Not sequenced, unsuccessful PCR	Before enrichment	x	NL	Attached to root	East	Betula sp.
32B-OITS1	x	Not sequenced, unsuccessful PCR	After enrichment	x	NL	Attached to root	East	Betula sp.
33A-OITS1	S30		Before enrichment	Samples 21-69	NL	Attached to root	East	Thuja sp.
33B-OITS1	S30		After enrichment	Samples 21-69	NL	Attached to root	East	Thuja sp.
34A-OITS1	S31		Before enrichment	Samples 21-69	NL	Attached to root	South and West	Prunus serrulata
34B-OITS1	S31		After enrichment	Samples 21-69	NL	Attached to root	South and West	Prunus serrulata
35A-OITS1	S32		Before enrichment	Samples 21-69	NL	Attached to root	South and West	Rhus typhina
35B-OITS1	S32		After enrichment	Samples 21-69	NL	Attached to root	South and West	Rhus typhina
36A-OITS1	S33		Before enrichment	Samples 21-69	PL	Attached to root	Greater Oslo	Pinus sylvestris
36B-OITS1	S33		After enrichment	Samples 21-69	PL	Attached to root	Greater Oslo	Pinus sylvestris
37A-OITS1	S34		Before enrichment	Samples 21-69	NL	Attached to root	South and West	Prunus sargentii ‘Rancho’
37B-OITS1	S34		After enrichment	Samples 21-69	NL	Attached to root	South and West	Prunus sargentii ‘Rancho’
38A-OITS1	S35		Before enrichment	Samples 21-69	NL	Attached to root	East	Quercus robur 'Fastigiata Koster', Prunus sargentii ‘Rancho’
38B-OITS1	S35		After enrichment	Samples 21-69	NL	Attached to root	East	Quercus robur 'Fastigiata Koster', Prunus sargentii ‘Rancho’
39A-OITS1	S36		Before enrichment	Samples 21-69	NL	Attached to root	East	Fagus sylvatica 'Riversii'
39B-OITS1	S36		After enrichment	Samples 21-69	NL	Attached to root	East	Fagus sylvatica 'Riversii'
40A-OITS1	S37		Before enrichment	Samples 21-69	NL	Attached to root	East	Prunus sargentii 'Rancho', Prunus serrulata ‘Kanzan’
40B-OITS1	S37		After enrichment	Samples 21-69	NL	Attached to root	East	Prunus sargentii 'Rancho', Prunus serrulata ‘Kanzan’
41A-OITS1	S38		Before enrichment	Samples 21-69	NL	Attached to root	East	Ulmus (hybrid), Acer platanoides
41B-OITS1	S38		After enrichment	Samples 21-69	NL	Attached to root	East	Ulmus (hybrid), Acer platanoides
42A-OITS1	S39		Before enrichment	Samples 21-69	NL	Debris	East	Debris
42B-OITS1	S39		After enrichment	Samples 21-69	NL	Debris	East	Debris
43A-OITS1	S40		Before enrichment	Samples 21-69	DK	Attached to root	East	Magnolia sp.
43B-OITS1	S40		After enrichment	Samples 21-69	DK	Attached to root	East	Magnolia sp.
44A-OITS1	S41		Before enrichment	Samples 21-69	SE	Attached to root	East	Quercus robur ’Fastigiata Koster’
44B-OITS1	S41		After enrichment	Samples 21-69	SE	Attached to root	East	Quercus robur ’Fastigiata Koster’
45A-OITS1	S42		Before enrichment	Samples 21-69	NL	Attached to root	East	Betula pubescens, Pinus parviflora
45B-OITS1	S42		After enrichment	Samples 21-69	NL	Attached to root	East	Betula pubescens, Pinus parviflora
46A-OITS1	S43		Before enrichment	Samples 21-69	DK	Attached to root	East	Ulmus minor ‘Vada’
46B-OITS1	S43		After enrichment	Samples 21-69	DK	Attached to root	East	Ulmus minor ‘Vada’
47A-OITS1	S44		Before enrichment	Samples 21-69	NL	Attached to root	East	Pinus nigra
47B-OITS1	S44		After enrichment	Samples 21-69	NL	Attached to root	East	Pinus nigra
48A-OITS1	S45		Before enrichment	Samples 21-69	NL	Attached to root	East	Acer palmatum
48B-OITS1	S45		After enrichment	Samples 21-69	NL	Attached to root	East	Acer palmatum
49A-OITS1	S46		Before enrichment	Samples 21-69	DE	Attached to root	Greater Oslo	Tsuga canadensis
49B-OITS1	S46		After enrichment	Samples 21-69	DE	Attached to root	Greater Oslo	Tsuga canadensis
50A-OITS1	S47		Before enrichment	Samples 21-69	DE	Attached to root	Greater Oslo	Ulmus sp.
50B-OITS1	S47		After enrichment	Samples 21-69	DE	Attached to root	Greater Oslo	Ulmus sp.
51A-OITS1	x	Not sequenced, unsuccessful PCR	Before enrichment	x	IT	Attached to root	Greater Oslo	Phyllostachys aurea (Syn. Bambusa)
51B-OITS1	x	Not sequenced, unsuccessful PCR	After enrichment	x	IT	Attached to root	Greater Oslo	Phyllostachys aurea (Syn. Bambusa)
52A-OITS1	x	Not sequenced, unsuccessful PCR	Before enrichment	x	IT	Attached to root	Greater Oslo	Olea europaea
52B-OITS1	x	Not sequenced, unsuccessful PCR	After enrichment	x	IT	Attached to root	Greater Oslo	Olea europaea
53A-OITS1	S48		Before enrichment	Samples 21-69	DK	Attached to root	Greater Oslo	Fagus sp., Ulmus sp.
53B-OITS1	S48		After enrichment	Samples 21-69	DK	Attached to root	Greater Oslo	Fagus sp., Ulmus sp.
54-1A-OITS1	S49		Before enrichment	Samples 21-69	IT via DK	Attached to root	South and West	Juniperus procumpens ’Nana’
54-1B-OITS1	S49		After enrichment	Samples 21-69	IT via DK	Attached to root	South and West	Juniperus procumpens ’Nana’
54-2A-OITS1	S50		Before enrichment	Samples 21-69	IT via DK	Attached to root	South and West	Olea europaea
54-2B-OITS1	S50		After enrichment	Samples 21-69	IT via DK	Attached to root	South and West	Olea europaea
54-3A-OITS1	x	Not sequenced, unsuccessful PCR	Before enrichment	x	IT via DK	Attached to root	South and West	Prunus sp.
54-3B-OITS1	x	Not sequenced, unsuccessful PCR	After enrichment	x	IT via DK	Attached to root	South and West	Prunus sp.
54-4A-OITS1	S51		Before enrichment	Samples 21-69	IT via DK	Attached to root	South and West	Chamaerops excelsa
54-4B-OITS1	S51		After enrichment	Samples 21-69	IT via DK	Attached to root	South and West	Chamaerops excelsa
55A-OITS1	S52		Before enrichment	Samples 21-69	DE	Attached to root	South and West	Acer platanoides
55B-OITS1	S52		After enrichment	Samples 21-69	DE	Attached to root	South and West	Acer platanoides
56-1A-OITS1	S53		Before enrichment	Samples 21-69	DK	Attached to root	South and West	Carpinus betulus
56-1B-OITS1	S53		After enrichment	Samples 21-69	DK	Attached to root	South and West	Carpinus betulus
56-2A-OITS1	S54		Before enrichment	Samples 21-69	DK	Attached to root	South and West	Prunus laurocerasus ‘Etna’
56-2B-OITS1	S54		After enrichment	Samples 21-69	DK	Attached to root	South and West	Prunus laurocerasus ‘Etna’
57A-OITS1	S55		Before enrichment	Samples 21-69	NL	Attached to root	East	Ginkgo biloba, Acer × freemanii
57B-OITS1	S55		After enrichment	Samples 21-69	NL	Attached to root	East	Ginkgo biloba, Acer × freemanii
58A-OITS1	S56		Before enrichment	Samples 21-69	DK	Attached to root	Greater Oslo	Cercidiphyllum japonicum
58B-OITS1	S56		After enrichment	Samples 21-69	DK	Attached to root	Greater Oslo	Cercidiphyllum japonicum
59A-OITS1	S57		Before enrichment	Samples 21-69	NL	Attached to root	Greater Oslo	Acer palmatum ‘Atropurpureum’
59B-OITS1	S57		After enrichment	Samples 21-69	NL	Attached to root	Greater Oslo	Acer palmatum ‘Atropurpureum’
60A-OITS1	S58		Before enrichment	Samples 21-69	IT via DK	Attached to root	Greater Oslo	Acer palmatum
60B-OITS1	S58		After enrichment	Samples 21-69	IT via DK	Attached to root	Greater Oslo	Acer palmatum
61A-OITS1	x	Not sequenced, unsuccessful PCR	Before enrichment	x	DE	Attached to root	Greater Oslo	Prunus sp.
61B-OITS1	x	Not sequenced, unsuccessful PCR	After enrichment	x	DE	Attached to root	Greater Oslo	Prunus sp.
62A-OITS1	S59		Before enrichment	Samples 21-69	DE	Attached to root	Greater Oslo	Syringa sp.
62B-OITS1	S59		After enrichment	Samples 21-69	DE	Attached to root	Greater Oslo	Syringa sp.
63A-OITS1	x	Not sequenced, unsuccessful PCR	Before enrichment	x	DE	Attached to root	Greater Oslo	Fargesia murielae
63B-OITS1	x	Not sequenced, unsuccessful PCR	After enrichment	x	DE	Attached to root	Greater Oslo	Fargesia murielae
64A-OITS1	S60		Before enrichment	Samples 21-69	DE	Attached to root	South and West	Thuja occidentalis ‘Smaragd’
64B-OITS1	S60		After enrichment	Samples 21-69	DE	Attached to root	South and West	Thuja occidentalis ‘Smaragd’
65A-OITS1	S61		Before enrichment	Samples 21-69	DK	Attached to root	East	Acer palmatum ‘Bloodgood’, Salix caprea, S. daphnoides
65B-OITS1	S61		After enrichment	Samples 21-69	DK	Attached to root	East	Acer palmatum ‘Bloodgood’, Salix caprea, S. daphnoides
66A-OITS1	x	Not sequenced, unsuccessful PCR	Before enrichment	x	DK	Attached to root	East	Ulmus sp.
66B-OITS1	x	Not sequenced, unsuccessful PCR	After enrichment	x	DK	Attached to root	East	Ulmus sp.
67A-OITS1	S62		Before enrichment	Samples 21-69	DK	Debris	East	Debris
67B-OITS1	S62		After enrichment	Samples 21-69	DK	Debris	East	Debris
68A-OITS1	S63		Before enrichment	Samples 21-69	SE	Attached to root	East	Populus tremula
68B-OITS1	S63		After enrichment	Samples 21-69	SE	Attached to root	East	Populus tremula
69A-OITS1	S64		Before enrichment	Samples 21-69	IT via DK	Attached to root	Greater Oslo	Thuja occidentalis ’Smaragd’
69B-OITS1	S64		After enrichment	Samples 21-69	IT via DK	Attached to root	Greater Oslo	Thuja occidentalis ’Smaragd’

## Sheet: Positive controls
Species	Organism	ASV cluster based on sequence alignment	Comment
Phytophthora rosacearum	Oomycete	ASV14, ASV523, ASV1850
Phytophthora gonapodyides	Oomycete	ASV5, ASV452
Phytophthora alni?	Oomycete	ASV4, ASV28, ASV92,
Phytophthora gregata?	Oomycete	ASV39
Pythium undulatum	Oomycete	NA	Weak band on PCR
Phytophthora chlamydospora	Oomycete	ASV10
Phytophthora sp. nov	Oomycete	ASV3, ASV53, ASV194, ASV675, ASV1192, ASV2055
Phytophthora cactorum	Oomycete	NA	Weak band on PCR
Phytopythium litorale	Oomycete	ASV36, ASV420, ASV586, ASV659
Phytophthora lacustris	Oomycete	ASV22, ASV1138, ASV1740
Phytophthora gonapodyides	Oomycete	ASV5, ASV38, ASV80, ASV452
Phytopythium citrinum	Oomycete	ASV385, ASV2783, ASV3049
Cylindrocladiella parva / Cylindrocladiella stellenboschensis	Fungus	NA
Truncatella angustata	Fungus	NA
Diaporthe eres (Phomopsis velata)	Fungus	NA
Ilyonectria robusta	Fungus	NA
Boeremia exigua	Fungus	NA
Ilyonectra radicicola/ I. rufa	Fungus	NA
Neonectria candida / N. ramulariae	Fungus	NA
Fusarium oxysporum	Fungus	NA
Fusarium proliferatum/ F. verticilloides/ F. fujikuroi/ F. globosum	Fungus	NA
Dactylonectria torresensis/ D. macrodidyma/ D. alcacerensis	Fungus	NA
Alternaria alternata / A. tenuissima	Fungus	NA
