# Supplementary material for: DNA Metabarcoding Reveals Broad Presence of Plant Pathogenic Oomycetes in Soil From Internationally Traded Plants
Source: Front Microbiol. 2021 Mar 25;12:637068. doi: 10.3389/fmicb.2021.637068 (PMC8027490; doi:10.3389/fmicb.2021.637068)
Supplement: Supplementary Table 3 — Occurrence of ASVs in the samples and their full taxonomy. For each ASV, the ASV count is given for all samples. The taxonomy derived from local BLAST against the NCBI nt database is provided on seven taxonomic levels (where available): Kingdom, Phylum, Class, Order, Family, Genus, Species. [file Table_3.xlsx]

## Sheet: Sheet1
ASV	Kingdom	Phylum	Class	Order	Family	Genus	Species	S01_Before enrichment	S01_After_enrichment	S02_Before enrichment	S02_After_enrichment	S03_Before enrichment	S03_After_enrichment	S04_Before enrichment	S04_After_enrichment	S05_Before enrichment	S05_After_enrichment	S06_Before enrichment	S06_After_enrichment	S07_Before enrichment	S07_After_enrichment	S08_Before enrichment	S08_After_enrichment	S09_After_enrichment	S10_After_enrichment	S11_Before enrichment	S11_After_enrichment	S12_After_enrichment	S13_Before enrichment	S13_After_enrichment	S14_Before enrichment	S14_After_enrichment	S15_Before enrichment	S15_After_enrichment	S16_Before enrichment	S16_After_enrichment	S17_Before enrichment	S18_Before enrichment	S19_Before enrichment	S19_After_enrichment	S20_Before enrichment	S20_After_enrichment	S21_Before enrichment	S21_After_enrichment	S22_Before enrichment	S22_After_enrichment	S23_Before enrichment	S23_After_enrichment	S24_Before enrichment
ASV1	Stramenopila	Heterokontophyta	Oomycetes	Pythiales	Pythiaceae	Pythium	Pythium attrantheridium	12207	21689	38	12	57345	15044	4702	15524	6985	15091	1541	6111	1102	19758	118	271	0	848	0	0	13257	0	984	25968	38011	2373	11211	1163	12653	1115	1631	1935	17318	6781	570	7	0	14257	4119	5712	3306	682
ASV2	Stramenopila	Heterokontophyta	Oomycetes	Pythiales	Pythiaceae	Pythium	Pythium sylvaticum	4842	946	1504	1256	12241	79	1805	4211	227	1317	1102	3084	1598	2938	0	65	0	1626	842	1128	2497	2169	9182	260	586	433	1765	2101	2143	3207	0	3367	6881	2533	587	0	0	2731	803	1169	2954	249
ASV3	Stramenopila	Heterokontophyta	Oomycetes	Peronosporales	Peronosporaceae	Phytophthora	Phytophthora capensis	0	0	0	0	0	0	0	2	2	0	0	0	0	0	0	0	0	0	0	0	0	0	0	0	0	0	0	0	0	0	0	0	0	0	0	0	0	0	0	0	0	0
ASV5	Stramenopila	Heterokontophyta	Oomycetes	Peronosporales	Peronosporaceae	Phytophthora	Phytophthora taxon paludosa	0	0	0	0	0	0	0	0	0	0	0	0	0	0	0	0	0	0	0	0	0	0	0	0	0	0	0	0	0	0	0	0	0	0	0	0	0	0	0	0	0	0
ASV6	Stramenopila	Heterokontophyta	Oomycetes	Peronosporales	Peronosporaceae	Phytophthora	Phytophthora cambivora	0	0	39344	63581	0	0	0	0	0	0	0	0	0	0	0	0	0	0	0	0	0	0	0	0	0	0	0	0	2	0	0	0	0	0	0	0	0	0	0	0	0	0
ASV7	Stramenopila	Heterokontophyta	Oomycetes	Pythiales	Pythiaceae	Globisporangium	Globisporangium intermedium	1684	0	0	0	1121	26	82	96	707	1138	0	0	0	0	1308	326	0	0	0	0	1143	0	0	0	0	0	0	199	1778	0	0	703	579	0	0	0	0	0	0	0	0	0
ASV8	Stramenopila	Heterokontophyta	Oomycetes	Pythiales	Pythiaceae	Globisporangium	Globisporangium ultimum	0	0	0	0	0	0	44	0	978	230	0	0	0	0	0	0	0	0	1310	370	0	0	0	0	0	0	0	272	1145	0	0	0	0	2363	784	20393	13408	0	0	761	915	0
ASV9			Chrysophyceae	Chromulinales	Chromulinaceae	Pedospumella	Pedospumella sp. JBM19	0	220	750	448	3	0	0	0	0	0	0	5801	0	0	39	29	1021	0	0	10173	0	264	887	0	0	0	0	0	0	0	1474	0	0	0	0	2438	2078	0	0	0	0	0
ASV11	Stramenopila	Heterokontophyta	Oomycetes	Saprolegniales	Saprolegniaceae	Aphanomyces	Aphanomyces sp. APH2	0	0	187	149	0	0	0	0	0	0	0	0	45133	0	96	164	0	0	0	0	0	0	0	0	0	437	671	0	0	0	0	200	5064	0	0	0	0	0	0	0	253	0
ASV12	Stramenopila	Heterokontophyta	Oomycetes	Pythiales	Pythiaceae	Pythium	Pythium heterothallicum	477	1642	0	0	1580	476	3968	8414	7429	9888	0	0	0	0	0	0	0	0	0	0	505	0	0	381	0	0	0	444	0	0	0	0	0	0	0	0	0	0	0	0	0	0
ASV13	Stramenopila	Heterokontophyta	Oomycetes	Saprolegniales	Saprolegniaceae	Pythiopsis	Pythiopsis intermedia	669	705	0	0	302	100	1122	1731	4441	950	0	381	8623	5246	0	0	0	0	0	0	1894	0	0	481	2061	0	0	0	0	0	0	0	75	0	0	0	0	1028	0	200	22	0
ASV15	Fungi	'uncultured fungus'	'uncultured fungus'	'uncultured fungus'	'uncultured fungus'	'uncultured fungus'	uncultured fungus	0	0	1250	320	0	70	80	0	0	0	0	230	0	0	0	18	0	73	656	79	748	422	1147	0	596	1219	5428	0	0	0	0	375	6395	719	294	0	0	2173	0	0	87	0
ASV16			Chrysophyceae	Chromulinales	Chromulinaceae	'Spumella-like'	Spumella-like flagellate 194f	0	13	21	125	0	0	0	0	0	0	0	55	0	2901	0	15	166	0	0	0	149	0	145	0	0	0	0	0	91	0	0	0	0	0	192	196	1947	3420	573	0	0	0
ASV17	Stramenopila	Heterokontophyta	Oomycetes	Pythiales	Pythiaceae	Globisporangium	Globisporangium intermedium	0	0	18	0	0	0	0	0	0	0	0	0	0	0	217	24	54309	0	0	0	0	0	0	0	0	0	0	0	0	0	0	0	0	0	0	0	0	0	0	0	0	0
ASV18	Stramenopila	Heterokontophyta	Oomycetes	Peronosporales	Peronosporaceae	Phytophthora	Phytophthora gonapodyides	0	0	0	0	0	30	0	0	0	0	0	0	0	0	0	0	0	0	0	0	0	0	0	0	0	0	0	0	0	0	0	0	0	0	0	0	0	0	0	0	0	0
ASV19	Stramenopila	Heterokontophyta	Oomycetes	Pythiales	Pythiogetonaceae	Pythiogeton	Pythiogeton proliferatum	0	0	0	0	0	21109	0	0	0	0	0	0	0	0	0	0	0	0	0	0	0	0	0	0	0	0	0	0	0	0	0	0	0	0	0	0	0	0	0	0	0	0
ASV20			Chrysophyceae	Chromulinales	Chromulinaceae	Pedospumella	Pedospumella sp. JBM19	0	0	0	0	0	0	0	0	0	0	0	1191	0	0	0	0	0	0	0	1238	0	0	0	0	0	0	649	0	0	0	0	0	0	0	4433	0	0	0	0	0	512	0
ASV21	Stramenopila	Heterokontophyta	Oomycetes	Pythiales	Pythiaceae	Pythium	Pythium salpingophorum	0	0	0	0	0	0	0	0	0	0	0	0	0	0	114	38903	0	0	0	0	0	0	0	0	0	0	0	0	0	0	0	0	0	0	0	0	0	0	0	0	0	0
ASV23	Stramenopila	Heterokontophyta	Oomycetes	Pythiales	Pythiaceae	Pythium	Pythium sp. FL-2016f	173	426	0	0	2099	303	1139	2179	909	2279	0	671	556	0	0	0	0	0	0	0	0	0	0	87	171	0	390	177	3862	0	0	0	0	0	0	0	0	814	405	0	0	0
ASV24	Stramenopila	Heterokontophyta	Oomycetes	Pythiales	Pythiaceae	Pythium	Pythium salpingophorum	0	0	7	52	0	0	0	0	0	0	0	0	0	0	199	35964	56	0	0	0	0	0	0	0	0	0	4	0	0	0	0	0	0	0	0	0	0	0	0	0	0	0
ASV25	Stramenopila	Heterokontophyta	Oomycetes	Peronosporales	Peronosporaceae	Phytophthora	Phytophthora undulata	0	0	0	0	0	0	0	0	0	0	0	0	0	0	0	0	0	0	0	0	0	0	0	0	0	0	0	0	0	0	0	0	0	0	0	0	842	0	0	0	0	0
ASV26	Stramenopila	Heterokontophyta	Oomycetes	Pythiales	Pythiaceae	Pythium	Pythium sp. unique1sub3	407	674	0	0	245	197	96	1137	0	0	0	0	0	0	0	0	0	0	0	0	1122	0	166	2893	5426	0	0	0	0	0	0	0	0	0	0	0	0	858	968	246	668	0
ASV27	Stramenopila	Heterokontophyta	Oomycetes	Pythiales	Pythiaceae	Pythium	Pythium aff. monospermum	575	1700	0	0	466	319	89	883	2168	3115	0	0	0	0	0	0	0	0	0	0	0	0	309	1628	7135	0	0	0	1614	0	0	80	0	0	0	0	0	0	0	0	0	0
ASV29	Stramenopila	Heterokontophyta	Oomycetes	Pythiales	Pythiaceae	Pythium	Pythium monospermum	8093	2020	0	0	810	195	0	0	1021	0	571	0	0	0	0	0	0	6419	0	0	86	0	7558	75	0	1310	0	0	0	0	0	233	0	0	0	796	756	0	0	0	0	0
ASV30	Stramenopila	Heterokontophyta	Oomycetes			Haptoglossa	Haptoglossa zoospora	323	99	299	58	0	0	0	0	0	0	0	514	258	293	252	264	458	377	289	0	621	0	0	22	0	352	335	331	293	0	0	179	343	640	404	0	139	457	446	342	722	0
ASV31	Stramenopila	Heterokontophyta	Oomycetes	Pythiales	Pythiaceae	Pythium	Pythium oligandrum	735	704	0	0	749	297	486	1857	3577	628	0	100	0	0	44	12	0	34	0	0	585	0	228	180	184	0	0	141	0	0	0	0	0	0	0	0	0	564	226	0	90	0
ASV32			Chrysophyceae	Chromulinales	Chromulinaceae	Pedospumella	Pedospumella sp. JBM19	0	0	0	0	0	0	0	0	0	0	0	0	0	0	0	0	0	0	0	0	0	0	0	0	0	0	0	0	5126	0	0	0	0	0	0	36	0	0	0	0	0	0
ASV33	Stramenopila	Heterokontophyta	Oomycetes	Pythiales	Pythiaceae	Pythium	Pythium helicandrum	0	0	0	0	0	0	0	0	0	0	0	0	0	0	0	0	28646	0	0	0	0	0	0	0	0	0	0	0	0	0	0	0	0	0	0	0	0	0	0	0	0	0
ASV34	Stramenopila	Heterokontophyta	Oomycetes	Pythiales	Pythiaceae	Pythium	Pythium monospermum	7093	801	0	0	1174	123	321	319	156	290	0	0	0	0	0	0	0	0	0	0	0	0	0	34	1626	0	0	0	6241	0	0	0	0	0	0	0	0	0	0	0	0	0
ASV35			Chrysophyceae	Chromulinales	Chromulinaceae	Pedospumella	Pedospumella encystans	66	46	31	29	34	808	27	362	973	1229	551	0	26	114	0	0	0	0	23	61	109	166	174	49	479	910	227	8	84	37	0	138	427	481	48	147	0	498	2020	122	59	101
ASV36	Stramenopila	Heterokontophyta	Oomycetes	Pythiales	Pythiaceae	Phytopythium	Phytopythium litorale	0	0	0	0	0	0	0	0	0	0	0	0	0	0	0	76	0	0	0	0	0	0	0	0	0	0	0	0	0	0	0	0	0	0	0	0	0	0	0	0	0	0
ASV37	Stramenopila	Heterokontophyta	Oomycetes	Peronosporales	Peronosporaceae	Phytophthora	Phytophthora syringae	1208	911	0	0	676	1193	87	2060	2239	904	0	228	0	0	26	106	205	0	0	384	0	0	110	108	654	0	0	141	1038	222	0	0	70	0	0	0	0	0	0	642	800	0
ASV40	Stramenopila	Heterokontophyta	Oomycetes	Pythiales	Pythiaceae	Pythium	Pythium rostratifingens	526	90	0	0	770	24	139	0	73	0	0	24	55	0	0	0	0	0	81	0	24	325	134	44	105	236	167	1263	5677	0	0	110	21	0	0	147	84	0	0	0	137	60
ASV41	Stramenopila	Heterokontophyta	Oomycetes	Pythiales	Pythiaceae	Pythium	Pythium monospermum	642	709	0	0	263	240	0	15	0	0	0	0	0	0	0	0	0	0	0	0	0	0	0	1384	3458	0	0	0	4201	0	0	0	0	0	0	0	0	0	0	0	0	0
ASV42			Chrysophyceae	Chromulinales	Chromulinaceae	'Spumella-like'	Spumella-like flagellate 1006	0	0	0	0	0	0	0	0	0	0	0	47	0	0	0	0	0	0	0	0	0	0	0	0	0	0	0	0	0	0	0	0	0	1322	397	0	0	0	0	0	0	0
ASV43	Stramenopila	Heterokontophyta	Oomycetes	Pythiales	Pythiaceae	Pythium	Pythium attrantheridium	0	426	0	0	305	0	61	157	0	0	0	0	294	2479	0	0	0	125	0	0	300	0	0	0	403	272	1374	0	0	0	1164	65	346	244	142	0	0	0	129	324	295	0
ASV44	Stramenopila	Heterokontophyta	Oomycetes	Pythiales	Pythiogetonaceae	Pythiogeton	Pythiogeton proliferatum	0	0	0	0	38	18480	0	0	0	0	0	0	0	0	0	0	0	0	0	0	0	0	0	0	0	0	0	0	0	0	0	0	0	0	0	0	0	0	0	0	0	0
ASV45		Bacillariophyta	Bacillariophyceae	Surirellales	Surirellaceae	Surirella	Surirella sp. CCAP 1071/2	100	1613	0	0	0	60	0	2666	5290	5339	0	0	0	0	0	0	0	0	0	0	0	0	382	0	82	0	0	0	0	0	0	0	0	0	0	0	0	0	0	0	0	0
ASV46	Stramenopila	Heterokontophyta	Oomycetes	Pythiales	Pythiaceae	Pythium	Pythium sp. unique1	420	541	0	0	386	113	0	0	2992	1045	0	0	0	0	0	0	0	0	0	0	205	0	544	666	716	0	0	0	186	0	0	0	0	0	0	0	0	0	0	0	0	0
ASV47			Chrysophyceae	Chromulinales	Chromulinaceae	Pedospumella	Pedospumella sp. JBM19	0	0	0	0	0	0	0	0	0	0	0	0	0	0	0	0	0	0	0	0	0	0	0	0	0	0	0	0	0	0	0	0	0	0	12799	0	3467	0	0	0	0	0
ASV48	Stramenopila	Heterokontophyta	Oomycetes	Pythiales	Pythiaceae	Globisporangium	Globisporangium intermedium	745	0	0	0	0	0	0	0	0	0	0	0	0	0	915	237	0	0	0	0	269	0	0	0	0	0	0	41	132	0	0	433	257	0	0	0	0	0	0	0	0	0
ASV49	Stramenopila	Heterokontophyta	Oomycetes			Haptoglossa	Haptoglossa zoospora	0	0	0	0	0	0	0	0	0	0	0	0	0	0	0	0	0	0	0	0	0	0	0	0	0	0	0	0	0	0	0	0	0	0	0	0	0	0	0	0	0	0
ASV50			Chrysophyceae	Chromulinales	Chromulinaceae	'Spumella-like'	Spumella-like flagellate 194f	0	0	0	0	0	0	0	0	0	0	0	0	0	0	0	0	0	0	0	0	0	0	64	0	0	0	0	0	0	0	0	0	0	0	0	123	1398	1588	324	0	0	0
ASV51	Stramenopila	Heterokontophyta	Oomycetes	Pythiales	Pythiaceae	Pythium	Pythium heterothallicum	0	0	0	0	0	0	0	0	0	0	0	0	0	0	0	0	0	0	0	0	0	0	0	0	418	0	0	0	829	0	0	0	0	0	0	0	0	0	0	0	0	0
ASV52	Stramenopila	Heterokontophyta	Oomycetes	Pythiales	Pythiogetonaceae	Pythiogeton	Pythiogeton zizaniae	0	0	0	0	0	8193	0	2751	0	1185	0	0	0	0	0	0	0	0	0	0	0	0	0	0	945	0	0	0	0	0	0	0	0	0	0	0	0	0	0	0	0	0
ASV54	Stramenopila	Heterokontophyta	Oomycetes	Peronosporales	Peronosporaceae	Phytophthora	Phytophthora fragariae	0	0	0	0	0	0	0	0	0	0	0	0	0	0	2610	10132	0	0	0	0	0	0	0	0	0	0	0	0	0	0	0	0	0	0	0	0	0	0	0	0	0	0
ASV55			Chrysophyceae	Chromulinales	Chromulinaceae	Pedospumella	Pedospumella sp. JBM19	0	0	0	11	0	0	0	0	0	0	0	0	0	0	0	0	0	10648	0	0	0	0	0	0	0	0	0	0	0	0	0	0	0	0	0	0	0	0	0	0	0	0
ASV56	Stramenopila	Heterokontophyta	Oomycetes	Pythiales	Pythiaceae	Pythium	Pythium monospermum	0	0	0	0	0	0	0	0	0	240	0	0	0	0	237	0	0	0	0	0	0	0	0	0	0	0	0	0	4260	0	0	0	0	0	0	0	0	0	0	0	0	0
ASV57	Stramenopila	Heterokontophyta	Oomycetes	Peronosporales	Peronosporaceae	Phytophthora	Phytophthora cambivora	0	0	4761	7013	0	0	0	0	0	0	0	0	0	0	0	0	0	0	0	0	0	0	0	0	0	0	0	0	0	0	0	0	0	0	0	0	0	0	0	0	0	0
ASV58			Chrysophyceae	Chromulinales	Chromulinaceae	'Spumella-like'	Spumella-like flagellate 1006	0	0	0	0	0	0	0	0	0	0	0	0	0	0	0	0	0	75	0	0	99	0	0	0	0	0	0	0	0	0	0	53	0	0	0	0	0	0	0	0	0	0
ASV59	Stramenopila	Heterokontophyta	Oomycetes	Pythiales	Pythiaceae	Pythium	Pythium sp. FL-2016h	590	1141	0	0	128	98	637	831	1787	959	0	0	0	0	0	0	0	0	0	0	0	0	0	62	41	0	0	0	0	0	0	0	0	0	0	0	0	0	0	0	0	0
ASV60			Chrysophyceae	Chromulinales	Chromulinaceae	'Spumella-like'	Spumella-like flagellate 1006	420	154	5	35	52	84	82	326	380	447	0	0	51	2718	0	74	9	0	43	103	190	0	37	7	325	277	50	26	295	0	0	29	0	406	49	95	0	0	0	0	0	0
ASV61	Stramenopila	Heterokontophyta	Oomycetes	Pythiales	Pythiaceae	Pythium	Pythium aff. monospermum	235	7186	0	0	81	0	0	167	0	0	0	0	0	0	0	0	0	0	0	0	0	0	0	29	571	0	0	0	0	0	0	0	0	0	0	0	0	0	0	0	0	0
ASV62			Chrysophyceae	Chromulinales	Chromulinaceae	'Spumella-like'	Spumella-like flagellate 1006	0	0	0	0	0	0	0	0	0	0	0	0	0	0	0	0	0	0	0	0	0	0	0	0	0	0	0	0	0	0	0	0	0	0	0	0	0	0	0	0	0	0
ASV63	Stramenopila	Heterokontophyta	Oomycetes	Peronosporales	Peronosporaceae	Phytophthora	Phytophthora clandestina	0	10303	0	0	0	0	0	0	0	0	0	0	0	0	0	0	0	0	0	0	0	0	0	0	0	0	0	0	0	0	0	0	0	0	0	0	0	0	0	0	0	0
ASV64	Stramenopila	Heterokontophyta	Oomycetes	Pythiales	Pythiaceae	Pythium	Pythium monospermum	0	618	0	0	0	0	266	0	0	0	0	0	0	0	0	0	0	3219	0	0	0	0	0	0	247	0	0	0	0	0	0	0	0	0	0	549	923	267	0	0	0	0
ASV65	Fungi	'uncultured fungus'	'uncultured fungus'	'uncultured fungus'	'uncultured fungus'	'uncultured fungus'	uncultured fungus	0	0	101	89	0	0	0	0	0	0	962	181	26	0	0	0	0	0	0	0	0	0	0	0	0	0	0	0	0	0	0	0	0	0	0	369	0	0	0	0	0	0
ASV66		Bacillariophyta	Bacillariophyceae	Surirellales	Surirellaceae	Surirella	Surirella sp. CCAP 1071/2	0	1476	0	0	58	143	185	1934	1924	2860	0	0	0	0	0	0	0	0	0	0	0	0	0	19	0	0	0	0	0	0	0	0	0	0	0	0	0	0	0	0	0	0
ASV67			Chrysophyceae	Chromulinales	Chromulinaceae	Pedospumella	Pedospumella sp. JBM19	0	0	0	0	0	0	0	0	0	0	0	0	0	0	0	0	0	6330	0	0	0	0	0	0	0	0	0	0	0	0	0	0	0	0	0	0	0	0	0	0	0	0
ASV68	Stramenopila	Heterokontophyta	Oomycetes	Pythiales	'uncultured Pythium'	'uncultured Pythium'	uncultured Pythium	174	60	0	36	0	0	0	0	0	0	0	0	0	0	0	0	134	0	0	0	126	0	0	0	0	0	0	0	0	0	0	0	0	0	0	0	0	0	0	396	543	0
ASV69	Stramenopila	Heterokontophyta	Oomycetes	Saprolegniales	Saprolegniaceae	Pythiopsis	Pythiopsis cymosa	0	115	0	0	16	0	47	132	0	0	0	1294	0	0	0	0	118	0	0	0	0	0	0	52	222	0	0	230	1108	0	0	0	602	0	0	0	0	0	0	0	0	0
ASV70			Chrysophyceae	Chromulinales	Chromulinaceae	Spumella	Spumella sp.	0	21	0	4	0	21	0	0	0	0	0	0	0	0	0	18	137	0	0	0	0	0	0	0	0	0	0	0	0	0	0	0	0	0	0	285	93	0	0	0	0	0
ASV71	Stramenopila	Heterokontophyta	Oomycetes	Saprolegniales	Saprolegniaceae	Pythiopsis	Pythiopsis humphreyana	0	0	0	0	0	0	0	0	0	0	0	0	0	0	0	0	0	0	0	0	0	0	0	0	0	0	0	0	0	0	0	0	0	0	0	2898	5791	0	0	0	0	0
ASV72	Stramenopila	Heterokontophyta	Oomycetes	Peronosporales	Peronosporaceae	Phytophthora	Phytophthora clandestina	0	8624	0	0	0	0	0	0	0	0	0	0	0	0	0	0	0	0	0	0	0	0	0	0	0	0	0	0	0	0	0	0	0	0	0	0	0	0	0	0	0	0
ASV73	Stramenopila	Heterokontophyta	Oomycetes	Pythiales	Pythiaceae	Pythium	Pythium heterothallicum	0	0	0	0	98	0	784	610	540	1077	0	0	0	0	0	0	0	0	0	0	0	0	0	0	85	0	0	0	0	0	0	0	0	0	0	0	0	0	0	0	0	0
ASV74	Stramenopila	Heterokontophyta	Oomycetes	Pythiales	Pythiaceae	Pythium	Pythium monospermum	992	0	66	0	209	0	0	388	0	0	0	0	0	0	511	92	0	0	0	0	0	0	4097	0	0	0	0	0	0	0	0	0	0	0	0	0	0	0	0	0	0	0
ASV75	Stramenopila	Heterokontophyta	Oomycetes	Peronosporales	Peronosporaceae	Phytophthora	Phytophthora castanetorum	0	0	0	0	0	0	0	0	0	0	0	0	0	0	0	0	0	0	0	0	0	0	0	0	0	0	0	0	0	0	0	0	0	0	0	0	0	0	0	0	0	0
ASV76	Stramenopila	Heterokontophyta	Oomycetes	Lagenidiales	Lagenidiaceae	Lagenidium	Lagenidium juracyae	0	0	153	1868	0	0	0	0	0	0	0	0	0	0	598	1088	2836	0	0	0	0	0	0	0	125	0	0	0	0	0	0	0	0	0	0	0	0	0	0	0	0	0
ASV77	Stramenopila	Heterokontophyta	Oomycetes	Pythiales	Pythiaceae	Pythium	Pythium irregulare	0	0	0	0	0	0	0	0	0	0	0	0	0	65	0	0	0	0	0	0	50	0	329	0	0	129	211	0	0	0	0	0	0	0	0	0	0	0	0	0	28	690
ASV78	Metazoa	Arthropoda	Insecta	Hymenoptera	Vespidae	Polistes	Polistes canadensis	0	0	0	0	0	0	0	0	0	0	0	0	0	0	0	0	0	0	0	0	0	0	0	0	0	0	0	0	0	0	0	0	0	0	0	0	0	0	0	0	0	0
ASV79	Fungi	'uncultured fungus'	'uncultured fungus'	'uncultured fungus'	'uncultured fungus'	'uncultured fungus'	uncultured fungus	0	0	1115	19	67	0	0	0	0	0	0	0	0	0	9	0	0	0	0	0	0	0	0	38	0	460	894	0	0	0	0	0	469	0	0	143	0	0	0	0	0	0
ASV81		Bacillariophyta	Bacillariophyceae	Naviculales	Naviculaceae	Navicula	Navicula trivialis	0	231	0	0	31	0	0	0	2220	2835	1526	193	0	0	0	0	0	0	0	0	0	0	0	78	0	0	0	0	0	0	0	0	0	0	0	0	0	0	0	0	0	0
ASV82	Stramenopila	Heterokontophyta	Oomycetes	Pythiales	Pythiaceae	Pythium	Pythium heterothallicum	0	0	0	0	0	0	0	0	0	0	0	0	0	0	0	0	0	0	0	0	0	0	0	0	0	0	0	0	0	0	0	0	0	0	0	0	0	0	0	0	0	0
ASV83		Bacillariophyta	Bacillariophyceae	Surirellales	Surirellaceae	Surirella	Surirella sp. CCAP 1071/2	0	388	0	0	0	0	290	1105	2267	3010	0	0	0	0	0	0	0	0	0	0	0	0	0	57	104	0	0	0	0	0	0	0	0	0	0	0	0	0	0	0	0	0
ASV84			Chrysophyceae	Chromulinales	Chromulinaceae	Pedospumella	Pedospumella sp. JBM19	3	0	0	0	0	0	0	0	0	0	0	0	0	0	0	0	0	0	0	21	36	0	0	0	88	108	0	8	0	0	0	0	0	162	0	0	0	0	0	0	0	24
ASV85	Fungi	'uncultured fungus'	'uncultured fungus'	'uncultured fungus'	'uncultured fungus'	'uncultured fungus'	uncultured fungus	0	0	0	0	0	0	0	0	0	0	0	0	0	0	0	0	0	0	0	0	0	0	0	0	0	0	0	0	0	0	0	291	6950	0	0	0	0	0	0	0	0	0
ASV86	Stramenopila	Heterokontophyta	Oomycetes	Albuginales	Albuginaceae	Albugo	Albugo candida	0	0	0	0	0	0	2110	0	0	0	0	0	0	0	0	0	0	0	0	0	0	0	0	162	0	0	0	0	0	0	0	0	0	0	0	0	0	0	0	0	0	0
ASV87	Fungi	'uncultured fungus'	'uncultured fungus'	'uncultured fungus'	'uncultured fungus'	'uncultured fungus'	uncultured fungus	0	0	0	0	0	0	0	0	0	0	0	350	0	0	0	0	0	912	0	0	0	0	0	0	76	0	0	0	0	0	1489	341	0	0	0	0	0	0	0	0	82	0
ASV88			Chrysophyceae	Chromulinales	Chromulinaceae	'Spumella-like'	Spumella-like flagellate Got220	0	0	0	0	0	0	0	0	0	0	0	0	0	0	0	79	0	76	0	0	0	0	0	0	0	181	51	0	0	15	16	0	125	496	0	0	0	0	0	0	68	0
ASV89			Chrysophyceae	Chromulinales	Chromulinaceae	'Spumella-like'	Spumella-like flagellate 194f	0	0	0	0	0	0	0	0	9	0	11	0	0	369	0	0	0	0	0	0	29	0	0	0	12	0	0	0	52	0	0	0	0	8	0	11	427	242	0	0	0	0
ASV90			Dinophyceae	Prorocentrales	Prorocentraceae	Prorocentrum	Prorocentrum micans	22	0	0	0	15	0	0	555	0	0	0	124	50	240	0	0	0	0	0	0	36	0	0	0	0	147	0	74	284	0	0	49	0	74	0	0	0	31	0	846	841	0
ASV91	Stramenopila	Heterokontophyta	Oomycetes	Pythiales	Pythiaceae	Pythium	Pythium irregulare	12	0	0	0	11	0	0	0	0	0	0	0	0	60	0	0	0	0	0	0	59	0	0	0	0	191	0	46	162	0	0	0	74	0	0	0	0	0	0	0	0	726
ASV92	Stramenopila	Heterokontophyta	Oomycetes	Peronosporales	Peronosporaceae	Phytophthora	Phytophthora cambivora	0	0	2259	4078	0	0	0	0	0	0	0	0	0	0	0	0	0	0	0	0	0	0	0	0	0	0	0	0	0	0	0	0	0	0	0	0	0	0	0	0	0	0
ASV93	Stramenopila	Heterokontophyta	Oomycetes	Saprolegniales	Saprolegniaceae	Saprolegnia	Saprolegnia anisospora	0	0	0	0	0	0	0	0	0	0	0	0	0	0	0	0	242	0	0	0	0	0	0	0	1357	0	0	0	0	0	0	0	0	0	0	0	0	0	0	0	0	0
ASV95			Chrysophyceae	Chromulinales	Chromulinaceae	Pedospumella	Pedospumella sp. JBM19	0	0	0	0	0	0	0	0	0	0	0	0	0	0	0	0	0	0	0	1117	0	0	0	0	0	0	0	0	0	0	0	0	0	0	0	0	0	0	0	0	0	0
ASV96			Chrysophyceae	Chromulinales	Chromulinaceae	Pedospumella	Pedospumella sp. JBM19	3481	2075	0	0	0	0	0	0	0	0	0	0	0	33	0	0	0	0	0	0	0	0	0	0	0	0	0	0	0	0	101	0	0	0	0	0	0	0	0	0	0	0
ASV97	Fungi	'uncultured fungus'	'uncultured fungus'	'uncultured fungus'	'uncultured fungus'	'uncultured fungus'	uncultured fungus	465	528	0	0	27	0	0	0	0	0	0	0	0	0	0	0	0	0	0	0	0	0	0	0	0	1067	1073	0	0	0	0	0	0	0	0	0	0	5	0	0	0	0
ASV98			Chrysophyceae	Chromulinales	Chromulinaceae	Pedospumella	Pedospumella sp.	74	0	44	0	0	0	0	0	0	0	0	0	0	0	59	0	48	0	0	0	0	0	0	0	0	0	0	0	0	0	0	0	0	0	0	134	147	0	0	0	0	0
ASV99	Stramenopila	Heterokontophyta	Oomycetes	Pythiales	Pythiaceae	Pythium	Pythium monospermum	0	0	172	0	0	0	94	706	0	0	0	0	0	0	0	0	0	0	0	0	0	0	0	0	737	0	0	0	0	0	0	0	0	0	0	0	0	0	0	0	0	0
ASV100	Stramenopila	Heterokontophyta	Oomycetes	Pythiales	Pythiaceae	Pythium	Pythium irregulare	0	0	0	0	0	0	0	0	0	0	0	0	0	0	0	0	0	0	656	467	353	0	0	0	0	0	0	0	0	0	120	415	0	645	159	0	0	258	54	0	0	292
ASV101	Stramenopila	Heterokontophyta	Oomycetes			Haptoglossa	Haptoglossa zoospora	0	0	0	0	0	0	69	0	0	0	0	0	0	0	0	0	0	0	0	0	65	0	0	0	0	0	0	114	0	0	0	0	0	0	0	0	0	0	0	1057	916	663
ASV102	Stramenopila	Heterokontophyta	Oomycetes	Pythiales	Pythiaceae	Pythium	Pythium heterothallicum	0	0	0	0	321	0	0	1114	1306	0	0	0	0	0	0	0	0	0	0	0	0	0	0	0	97	0	0	0	0	0	0	0	0	0	0	0	0	0	0	0	0	0
ASV103	Stramenopila	Heterokontophyta	Oomycetes	Pythiales	Pythiaceae	Pythium	Pythium sp.	64	0	0	0	0	0	250	0	0	0	0	0	0	0	0	0	0	0	0	0	0	0	0	0	0	0	0	0	206	0	0	0	0	0	0	0	0	89	194	0	0	90
ASV104			Chrysophyceae	Chromulinales	Chromulinaceae	'Spumella-like'	Spumella-like flagellate 194f	0	0	0	0	0	0	0	0	0	0	0	0	0	0	0	0	0	0	0	0	0	0	0	0	0	0	0	0	0	0	0	0	0	0	0	0	0	297	103	0	0	0
ASV105	Stramenopila	Heterokontophyta	Oomycetes	Pythiales	Pythiaceae	Pythium	Pythium pleroticum	0	0	0	0	0	0	0	0	0	0	0	0	0	0	0	0	11	0	0	0	0	1872	0	0	0	0	0	0	0	0	0	0	0	0	0	0	0	0	0	0	0	0
ASV106	Metazoa	Chordata	Mammalia	Carnivora	Felidae	Lynx	Lynx canadensis	0	0	0	0	0	0	0	0	0	0	0	0	87	5266	0	0	0	0	0	0	0	0	0	0	0	0	0	0	0	0	0	0	0	0	0	0	0	0	0	0	0	0
ASV107	Stramenopila	Heterokontophyta	Oomycetes	Pythiales	Pythiaceae	Pythium	Pythium acanthicum	145	467	0	0	23	30	0	244	0	0	0	143	21	208	0	0	0	0	0	0	0	0	0	0	71	376	0	93	441	0	0	0	131	0	0	0	0	0	0	0	160	0
ASV108	Stramenopila	Heterokontophyta	Oomycetes	Pythiales	Pythiaceae	Pythium	Pythium anandrum	0	0	0	0	0	0	0	0	0	0	0	0	0	0	850	1351	0	0	0	0	0	0	0	0	0	0	0	0	0	0	0	0	0	0	0	0	0	0	0	0	0	0
ASV109	Stramenopila	Heterokontophyta	Oomycetes	Pythiales	Pythiaceae	Globisporangium	Globisporangium intermedium	803	396	0	0	36	11	0	342	0	0	0	0	0	0	0	0	0	0	0	0	0	0	0	128	36	0	0	0	0	0	0	4	0	0	0	0	0	0	0	0	0	0
ASV110	Stramenopila	Heterokontophyta	Oomycetes	Pythiales	Pythiaceae	Pythium	Pythium sp. FL-2016f	64	176	0	0	463	0	298	757	0	997	0	0	0	0	0	0	0	0	0	0	41	0	0	0	0	0	0	0	360	0	0	0	0	0	0	0	0	0	0	0	0	0
ASV111	Fungi	'uncultured fungus'	'uncultured fungus'	'uncultured fungus'	'uncultured fungus'	'uncultured fungus'	uncultured fungus	0	0	0	0	0	0	0	710	0	0	0	27	0	0	0	0	0	0	0	0	0	0	0	0	0	0	0	0	0	0	0	295	2905	0	0	0	0	0	0	0	0	0
ASV112	Stramenopila	Heterokontophyta	Oomycetes			Haptoglossa	Haptoglossa zoospora	0	0	0	0	0	0	69	0	0	0	0	0	0	0	0	0	0	0	0	0	0	0	0	0	0	0	0	0	108	0	0	0	0	0	0	0	0	0	0	79	706	0
ASV113	Stramenopila	Heterokontophyta	Oomycetes	Leptomitales		Apodachlya	Apodachlya minima	0	0	207	0	0	0	13	0	0	0	0	58	0	0	0	21	39	41	0	0	0	0	0	0	52	179	0	9	0	0	0	500	394	295	0	0	0	55	0	83	408	0
ASV114			Chrysophyceae	Chromulinales	Chromulinaceae	Pedospumella	Pedospumella sp.	0	0	45	0	0	0	0	0	0	0	0	6	0	0	54	0	0	0	0	0	0	114	36	0	0	0	0	0	0	0	0	0	0	0	0	0	291	0	0	0	0	0
ASV115	Stramenopila	Heterokontophyta	Oomycetes	Lagenidiales	Lagenidiaceae	Lagenidium	Lagenidium sp. SLG-2014b	0	0	0	0	0	42	0	0	0	0	0	0	0	0	0	0	31	0	204	0	0	0	328	37	0	0	0	0	0	0	0	250	0	0	0	322	274	0	0	143	163	0
ASV116	Fungi	'uncultured fungus'	'uncultured fungus'	'uncultured fungus'	'uncultured fungus'	'uncultured fungus'	uncultured fungus	441	446	47	36	0	0	0	0	0	0	0	0	0	0	0	0	0	0	0	0	0	0	0	0	0	1264	399	0	0	0	0	0	0	0	0	0	0	0	137	0	0	0
ASV117	Stramenopila	Heterokontophyta	Oomycetes	Peronosporales	Peronosporaceae	Phytophthora	Phytophthora plurivora	0	0	80	129	0	0	0	0	0	0	0	0	0	0	5	72	93	0	0	0	0	0	0	0	0	0	0	0	0	0	0	0	0	0	0	0	0	0	0	0	0	0
ASV118	Stramenopila	Heterokontophyta	Oomycetes	Pythiales	Pythiaceae	Pythium	Pythium camurandrum	0	0	0	0	507	41	362	0	0	0	0	0	0	0	0	0	0	0	0	0	0	0	0	0	0	0	0	0	0	0	0	0	0	0	0	0	0	0	0	0	0	0
ASV119	Stramenopila	Heterokontophyta	Oomycetes	Pythiales	'uncultured Pythium'	'uncultured Pythium'	uncultured Pythium	0	0	0	0	0	0	0	303	109	0	0	0	0	0	0	0	0	0	0	0	89	0	425	0	0	0	0	0	529	0	0	237	0	0	0	0	0	0	0	0	253	0
ASV120	Metazoa	Chordata	Actinopteri	Salmoniformes	Salmonidae	Coregonus	Coregonus sp. 'balchen'	0	0	0	0	0	0	10	13	0	0	702	44	26	132	0	0	0	24	0	0	136	0	0	0	0	115	68	0	0	10	0	187	393	117	0	17	0	0	0	61	18	14
ASV121	Stramenopila	Heterokontophyta	Oomycetes	Pythiales	Pythiaceae	Pythium	Pythium heterothallicum	0	0	0	0	334	0	0	894	480	0	0	0	0	0	0	0	0	0	0	0	0	0	0	0	64	0	0	0	281	0	0	0	0	0	0	0	0	0	0	0	0	0
ASV122	Stramenopila	Heterokontophyta	Oomycetes	Pythiales	Pythiaceae	Phytopythium	Phytopythium megacarpum	0	0	0	0	0	0	0	0	0	0	0	0	0	0	0	0	0	0	0	0	0	0	0	0	0	0	0	0	0	0	0	0	0	0	0	0	0	0	0	0	0	0
ASV123	Stramenopila	Heterokontophyta	Oomycetes	Pythiales	Pythiaceae	Pythium	Pythium sp. unique2	0	0	0	0	0	0	0	0	0	0	0	0	0	0	3926	318	34	0	0	0	0	0	0	0	0	0	0	0	0	0	0	0	0	0	0	0	0	0	0	0	0	0
ASV124	Stramenopila	Heterokontophyta	Oomycetes	Pythiales	Pythiaceae	Phytopythium	Phytopythium citrinum	0	0	0	0	0	0	0	0	0	0	0	0	0	0	0	0	0	0	0	0	0	0	0	0	0	0	0	0	0	0	0	0	0	0	0	0	0	0	0	0	0	0
ASV125			Dinophyceae	Prorocentrales	Prorocentraceae	Prorocentrum	Prorocentrum micans	0	0	0	0	0	0	0	0	0	0	0	0	0	0	0	0	0	0	0	0	0	0	0	0	0	0	0	0	0	0	0	0	0	0	0	0	0	0	0	0	0	0
ASV126		Bacillariophyta	Bacillariophyceae	Surirellales	Surirellaceae	Surirella	Surirella sp. CCAP 1071/2	0	160	0	0	0	0	140	261	1929	1206	0	0	0	0	0	0	0	0	0	0	0	0	0	69	0	0	0	0	0	0	0	0	0	0	0	0	0	0	0	0	0	0
ASV127	Stramenopila	Heterokontophyta	Oomycetes	Pythiales	Pythiaceae	Pythium	Pythium attrantheridium	0	0	0	0	711	281	239	0	1113	0	0	0	0	0	0	0	0	0	0	0	268	0	0	0	0	0	0	0	342	0	0	0	0	0	0	0	0	0	0	0	0	0
ASV128	Stramenopila	Heterokontophyta	Oomycetes	Pythiales	Pythiaceae	Pythium	Pythium tracheiphilum	0	0	0	0	0	0	0	543	148	711	0	0	0	0	0	0	0	0	0	0	0	0	0	0	0	0	0	0	0	0	0	0	0	0	0	0	0	0	0	225	0	0
ASV129	Stramenopila	Heterokontophyta	Oomycetes	Pythiales	Pythiaceae	Pythium	Pythium anandrum	13	0	0	0	0	21	0	205	68	164	0	0	80	221	0	0	0	0	0	0	25	0	0	0	0	73	0	0	0	0	0	18	67	0	0	0	0	41	0	224	0	20
ASV130	Stramenopila	Heterokontophyta	Oomycetes			Haptoglossa	Haptoglossa zoospora	0	0	0	0	0	0	77	0	0	0	0	0	0	0	0	0	0	0	0	0	0	0	0	0	0	0	0	0	0	0	0	0	0	0	0	0	0	0	0	215	379	0
ASV131	Stramenopila	Heterokontophyta	Oomycetes	Pythiales	Pythiaceae	Pythium	Pythium torulosum	0	0	0	0	15	22	0	299	0	665	0	189	0	0	0	0	0	0	0	0	0	0	0	0	0	0	331	0	244	0	0	177	0	0	0	0	0	0	0	0	0	0
ASV132	Stramenopila	Heterokontophyta	Oomycetes	Pythiales	Pythiaceae	Pythium	Pythium heterothallicum	56	0	0	0	128	0	0	0	1678	1513	0	0	0	0	0	0	0	0	0	0	0	0	0	0	0	0	0	0	0	0	0	0	0	0	0	0	0	0	0	0	0	0
ASV133	Stramenopila	Heterokontophyta	Oomycetes	Peronosporales	Peronosporaceae	Phytophthora	Phytophthora nicotianae	0	0	0	0	0	0	0	0	11	0	0	0	0	0	0	0	6	0	0	0	0	793	171	0	0	57	16	0	0	0	0	0	0	0	0	323	141	0	0	0	0	0
ASV134	Stramenopila	Heterokontophyta	Oomycetes	Pythiales	Pythiaceae	Pythium	Pythium sp. CAL-2011f	0	0	0	0	0	0	138	0	955	0	0	0	143	0	0	0	0	0	0	0	38	0	0	0	0	0	0	0	0	0	0	0	0	0	0	0	0	0	0	420	0	0
ASV135	Stramenopila	Heterokontophyta	Oomycetes	Saprolegniales	Saprolegniaceae	Aphanomyces	Aphanomyces sp. AW-I	630	589	0	0	301	46	0	0	0	0	0	0	0	0	0	0	0	0	0	0	76	0	0	0	0	0	0	0	0	0	0	0	0	0	0	0	0	0	0	0	0	0
ASV136	Viridiplantae	Streptophyta	Magnoliopsida	Solanales	Solanaceae	Solanum	Solanum lycopersicum	0	0	0	0	0	0	0	0	0	0	0	0	0	0	0	0	0	0	0	0	0	0	0	0	0	0	0	0	0	0	0	0	0	0	0	0	0	0	0	0	0	0
ASV137	Stramenopila	Heterokontophyta	Oomycetes	Pythiales	Pythiaceae	Pythium	Pythium pleroticum	360	499	0	0	66	102	125	199	104	346	0	0	0	0	0	0	0	0	0	0	0	0	0	118	0	0	0	0	0	0	0	0	0	0	0	0	0	0	0	0	0	0
ASV138	Stramenopila	Heterokontophyta	Oomycetes	Pythiales	Pythiaceae	Pythium	Pythium volutum	0	0	0	0	0	0	0	0	0	0	0	0	0	0	0	0	0	0	0	0	0	0	0	0	0	0	0	252	0	0	0	0	0	0	0	0	0	0	0	0	0	0
ASV139	Stramenopila	Heterokontophyta	Oomycetes	Pythiales	Pythiaceae	Pythium	Pythium sylvaticum	0	0	0	0	0	0	0	0	0	0	0	0	0	0	0	0	0	0	0	0	0	75	0	0	0	0	0	147	0	0	0	0	104	0	0	0	0	0	0	0	122	0
ASV140			Chrysophyceae	Chromulinales	Chromulinaceae	'Spumella-like'	Spumella-like flagellate 194f	0	0	0	0	0	0	0	0	0	0	0	0	0	0	0	0	0	0	0	4	47	0	0	0	74	0	0	0	0	0	0	0	0	0	160	0	427	1018	57	0	0	0
ASV141	Stramenopila	Heterokontophyta	Oomycetes	Pythiales	Pythiaceae	Pythium	Pythium sp.	0	255	0	0	509	0	0	0	895	0	0	0	0	0	0	0	0	0	0	0	0	0	0	0	0	0	0	0	0	0	0	0	0	0	0	0	0	0	0	376	0	0
ASV142	Stramenopila	Heterokontophyta	Oomycetes	Pythiales	Pythiaceae	Pythium	Pythium helicandrum	0	0	0	0	0	0	0	0	0	0	0	0	0	0	0	0	3718	0	0	0	0	0	0	0	0	0	0	0	0	0	0	0	0	0	0	0	0	0	0	0	0	0
ASV143	Stramenopila	Heterokontophyta	Oomycetes	Peronosporales	Peronosporaceae	Phytophthora	Phytophthora cactorum	0	0	0	0	34	0	0	0	0	470	0	0	0	0	58	119	0	0	0	0	0	0	0	0	0	0	0	0	0	0	0	0	0	0	0	0	0	0	0	0	0	0
ASV144	Metazoa	Chordata	Mammalia	Carnivora	Felidae	Lynx	Lynx canadensis	0	0	0	0	0	0	0	0	0	0	0	0	0	3382	0	0	0	0	0	0	0	0	0	0	0	0	0	0	0	0	0	0	0	0	0	0	0	0	0	0	0	0
ASV145	Stramenopila	Heterokontophyta	Oomycetes	Peronosporales	Peronosporaceae	Phytophthora	Phytophthora cambivora	0	0	986	2645	0	0	0	0	0	0	0	0	0	0	0	0	0	0	0	0	0	0	0	0	0	0	0	0	0	0	0	0	0	0	0	0	0	0	0	0	0	0
ASV146	Stramenopila	Heterokontophyta	Oomycetes	Lagenidiales	Lagenidiaceae	Lagenidium	Lagenidium sp. SL10	0	0	0	0	0	0	0	121	0	0	0	0	0	0	0	0	0	0	0	169	0	0	0	0	0	0	0	0	0	0	0	0	0	0	0	0	0	0	0	0	0	0
ASV147			Dinophyceae	Prorocentrales	Prorocentraceae	Prorocentrum	Prorocentrum micans	0	0	0	0	0	0	0	0	0	0	0	144	0	0	0	0	0	128	0	0	27	0	0	0	0	0	0	16	0	0	0	537	1205	0	0	0	0	0	0	0	0	0
ASV148	Stramenopila	Heterokontophyta	Oomycetes			Haptoglossa	Haptoglossa zoospora	0	51	474	431	0	0	0	0	0	0	0	0	0	0	95	558	0	0	0	0	0	0	0	0	0	0	0	0	0	0	0	0	0	0	0	1380	0	0	0	0	0	0
ASV149	Stramenopila	Heterokontophyta	Oomycetes	Pythiales	Pythiaceae	Pythium	Pythium junctum	0	0	0	0	43	0	0	0	715	0	0	0	0	0	0	0	0	0	0	0	0	0	0	0	181	0	0	0	0	0	0	0	0	0	0	0	0	0	0	0	0	0
ASV150	Stramenopila	Heterokontophyta	Oomycetes	Pythiales	Pythiaceae	Pythium	Pythium emineosum	0	0	0	0	0	0	0	0	0	0	0	0	0	0	0	0	0	0	0	0	0	0	0	0	0	0	0	0	0	0	0	0	0	0	0	0	0	0	0	0	0	0
ASV151	Stramenopila	Heterokontophyta	Oomycetes	Pythiales	Pythiaceae	Globisporangium	Globisporangium intermedium	29	14	0	0	106	66	727	41	0	137	0	0	0	0	0	0	0	0	0	0	0	0	0	0	0	0	0	0	0	0	0	0	0	0	0	0	0	0	0	0	0	0
ASV152	Fungi	'uncultured fungus'	'uncultured fungus'	'uncultured fungus'	'uncultured fungus'	'uncultured fungus'	uncultured fungus	171	0	0	0	0	0	0	0	0	0	0	92	0	0	0	0	0	0	0	0	238	0	0	0	0	0	0	6	218	0	0	0	60	0	0	0	0	0	0	236	91	0
ASV153			Chrysophyceae	Chromulinales	Chromulinaceae	Spumella	Spumella vulgaris	0	0	0	0	0	0	0	0	46	28	0	0	0	0	0	0	0	0	0	0	0	0	0	0	0	0	0	0	0	0	0	0	0	0	0	1745	1250	0	0	0	0	0
ASV154			Chrysophyceae	Chromulinales	Chromulinaceae	'Spumella-like'	Spumella-like flagellate Got220	0	0	101	74	0	0	0	0	0	0	0	0	0	0	0	0	0	0	0	0	0	0	0	0	0	0	0	0	0	0	0	0	0	0	0	0	0	0	0	0	0	0
ASV155	Stramenopila	Heterokontophyta	Oomycetes	Pythiales	Pythiaceae	Pythium	Pythium salpingophorum	0	0	0	0	0	0	0	0	0	0	0	0	0	0	0	3299	0	0	0	0	0	0	0	0	0	0	0	0	0	0	0	0	0	0	0	0	0	0	0	0	0	0
ASV156			Chrysophyceae	Chromulinales	Chromulinaceae	'Spumella-like'	Spumella-like flagellate Got220	0	0	0	0	0	0	0	0	0	0	0	0	0	3139	0	0	0	0	0	0	0	0	0	0	0	0	0	0	0	0	0	0	110	0	0	0	0	0	0	0	0	0
ASV157	Metazoa	Chordata	Actinopteri	Cypriniformes	Cyprinidae	Cyprinus	Cyprinus carpio	0	0	0	0	0	0	0	0	0	0	0	0	43	0	0	0	0	0	0	0	0	0	0	0	0	0	0	81	357	0	0	0	0	0	0	0	0	0	0	0	0	0
ASV158			Chrysophyceae	Chromulinales	Chromulinaceae	Spumella	Spumella rivalis	42	0	22	0	0	0	0	28	0	0	99	14	0	8	0	0	0	0	3	0	0	0	0	0	0	172	0	0	19	0	0	0	188	99	0	552	49	151	94	62	0	0
ASV159	Stramenopila	Heterokontophyta	Oomycetes	Pythiales	Pythiaceae	Pythium	Pythium sp. 1 ROH-2015	86	0	0	0	15	14	0	0	0	0	0	0	0	0	0	0	0	0	0	0	0	0	0	0	155	0	0	0	0	0	0	0	0	0	0	0	0	0	0	0	0	0
ASV160	Stramenopila	Heterokontophyta	Oomycetes	Albuginales	Albuginaceae	Albugo	Albugo sp. 28A	0	0	0	0	38	0	0	0	0	0	0	0	0	0	0	0	0	0	0	0	0	0	0	523	2016	0	0	0	0	0	0	0	0	0	0	0	0	0	0	0	0	0
ASV161	Stramenopila	Heterokontophyta	Oomycetes	Peronosporales	Peronosporaceae	Phytophthora	Phytophthora cactorum	0	0	0	0	0	0	0	0	0	0	0	0	0	0	1696	1505	0	0	0	0	0	0	0	0	0	0	0	0	0	0	0	0	0	0	0	0	0	0	0	0	0	0
ASV162			Chrysophyceae	Chromulinales	Chromulinaceae	Pedospumella	Pedospumella sp. JBM19	0	146	0	0	0	0	0	0	0	0	0	0	0	0	0	0	0	0	0	0	0	0	0	0	0	0	0	0	0	0	0	0	0	0	0	0	0	0	0	0	0	0
ASV163	Stramenopila	Heterokontophyta	Oomycetes	Pythiales	Pythiaceae	Pythium	Pythium sylvaticum	501	226	0	0	0	0	0	486	0	0	0	0	0	0	0	0	0	0	0	0	0	0	0	0	0	0	0	0	0	0	0	0	0	0	0	0	0	0	0	0	0	0
ASV164	Stramenopila	Heterokontophyta	Oomycetes	Pythiales	Pythiaceae	Pythium	Pythium heterothallicum	0	0	0	0	0	0	0	0	0	0	0	0	0	0	0	0	0	0	0	0	0	0	0	0	0	0	0	0	0	0	0	0	0	0	0	0	0	0	0	0	0	0
ASV165	Stramenopila	Heterokontophyta	Oomycetes	Pythiales	Pythiaceae	Pythium	Pythium cylindrosporum	0	0	0	0	0	0	0	0	0	0	0	0	0	0	0	0	0	0	0	0	0	0	0	0	0	0	0	0	0	0	0	0	0	0	0	0	0	0	0	0	0	0
ASV166	Stramenopila	Heterokontophyta	Oomycetes	Saprolegniales	Saprolegniaceae	Aphanomyces	Aphanomyces euteiches	0	0	0	0	0	0	7	0	0	1132	0	0	0	0	0	0	0	0	0	0	0	0	0	87	0	0	0	0	0	0	0	0	0	0	0	0	0	0	0	0	0	0
ASV167	Stramenopila	Heterokontophyta	Oomycetes	Pythiales	Pythiaceae	Pythium	Pythium heterothallicum	0	0	0	0	619	0	0	0	0	1302	0	0	0	0	0	0	0	0	0	0	0	0	0	0	0	0	0	0	0	0	0	0	0	0	0	0	0	0	0	0	0	0
ASV168		Bacillariophyta	Bacillariophyceae	Surirellales	Surirellaceae	Surirella	Surirella sp. CCAP 1071/2	0	0	0	0	0	0	0	0	0	0	0	476	0	0	0	0	0	0	0	0	0	0	0	0	0	0	0	0	0	0	0	0	0	0	0	0	0	0	0	0	0	0
ASV169	Stramenopila	Heterokontophyta	Oomycetes	Pythiales	Pythiaceae	Pythium	Pythium junctum	0	0	0	0	0	0	0	0	0	0	0	0	0	0	0	0	0	0	0	0	0	0	0	60	711	0	0	0	0	0	271	0	0	0	0	0	0	178	0	0	0	0
ASV170	Fungi	'uncultured fungus'	'uncultured fungus'	'uncultured fungus'	'uncultured fungus'	'uncultured fungus'	uncultured fungus	0	0	309	371	0	0	0	0	0	0	0	0	0	0	0	0	0	0	0	0	0	0	0	0	0	0	0	0	0	0	0	0	0	0	0	519	0	0	0	0	0	0
ASV171	Stramenopila	Heterokontophyta	Oomycetes	Pythiales	Pythiaceae	Pythium	Pythium macrosporum	0	0	39	715	0	0	0	0	0	0	0	0	0	0	0	0	0	0	41	0	0	0	0	0	0	0	0	0	0	303	0	0	0	0	0	0	0	0	0	147	0	0
ASV172	Stramenopila	Heterokontophyta	Oomycetes	Pythiales	Pythiaceae	Pythium	Pythium sp. FL-2016f	0	0	0	0	0	54	0	0	0	0	0	0	0	0	0	0	0	0	0	0	228	0	0	0	0	0	0	0	0	0	0	0	0	0	0	0	0	135	0	0	88	0
ASV173			Chrysophyceae	Chromulinales	Chromulinaceae	'Spumella-like'	Spumella-like flagellate 1006	0	60	0	0	0	22	24	80	0	91	0	0	67	36	7	63	11	0	185	47	72	0	0	0	22	0	25	35	0	0	0	0	119	97	37	0	0	0	0	0	11	0
ASV174	Stramenopila	Heterokontophyta	Oomycetes	Leptomitales	'uncultured Apodachlya'	'uncultured Apodachlya'	uncultured Apodachlya	0	0	836	1318	0	0	0	0	0	0	0	0	0	0	61	792	0	0	0	0	0	0	0	0	0	0	0	0	0	0	0	0	0	0	0	0	0	0	0	0	0	0
ASV175	Stramenopila	Heterokontophyta	Oomycetes	Saprolegniales	Saprolegniaceae	Phragmosporangium	Phragmosporangium uniseriatum	0	0	0	0	0	0	0	0	0	0	0	0	0	0	0	0	0	0	0	0	0	0	0	0	0	0	0	0	0	0	0	0	0	0	0	0	0	0	0	0	0	0
ASV176			Dinophyceae	Prorocentrales	Prorocentraceae	Prorocentrum	Prorocentrum micans	0	106	0	0	0	5	21	63	0	0	0	107	0	0	0	0	0	60	0	5	161	0	0	0	0	61	184	0	135	62	0	0	264	0	0	0	0	0	0	98	145	0
ASV177	Stramenopila	Heterokontophyta	Oomycetes	Saprolegniales	Saprolegniaceae	Leptolegnia	Leptolegnia eccentrica	0	0	0	0	0	0	0	0	0	0	0	118	0	0	0	0	0	0	0	0	0	0	0	0	0	0	0	0	0	0	0	0	0	0	0	0	0	0	0	0	0	0
ASV178	Stramenopila	Heterokontophyta	Oomycetes	Saprolegniales	Saprolegniaceae	Aphanomyces	Aphanomyces stellatus	0	0	0	0	0	0	0	0	0	0	0	0	0	0	0	0	0	0	0	0	0	0	0	0	0	0	0	0	0	0	0	0	0	0	0	0	0	0	0	0	0	0
ASV179	Stramenopila	Heterokontophyta	Oomycetes	Pythiales	Pythiaceae	Pythium	Pythium sp. unique1sub3	0	0	0	0	19	0	0	0	0	0	0	0	0	0	0	0	55	0	0	0	79	0	0	0	0	0	0	0	0	0	0	0	0	0	0	0	0	0	0	0	465	0
ASV180	Stramenopila	Heterokontophyta	Oomycetes			Haptoglossa	Haptoglossa zoospora	0	0	0	0	0	0	0	0	0	0	0	0	0	0	0	0	0	134	487	0	0	0	0	0	0	0	0	0	0	0	0	33	391	93	0	0	0	0	0	0	0	0
ASV181			Chrysophyceae	Chromulinales	Chromulinaceae	Pedospumella	Pedospumella sp.	0	0	0	0	0	0	0	0	0	0	0	0	0	0	0	0	0	0	0	0	0	0	0	0	0	0	0	0	0	0	0	0	0	0	0	0	0	0	0	0	0	0
ASV182	Stramenopila	Heterokontophyta	Oomycetes			Haptoglossa	Haptoglossa sp. SL32	0	0	0	0	0	0	0	0	0	0	0	0	0	0	0	20	0	0	0	0	0	0	0	0	0	0	0	0	0	0	0	0	0	0	0	2116	455	0	0	0	0	0
ASV183	Fungi	'uncultured fungus'	'uncultured fungus'	'uncultured fungus'	'uncultured fungus'	'uncultured fungus'	uncultured fungus	0	0	0	0	0	0	0	0	0	0	0	0	0	0	0	0	0	0	0	0	0	0	0	0	0	0	0	0	0	0	0	0	0	0	0	0	0	0	0	0	0	0
ASV184	Stramenopila	Heterokontophyta	Oomycetes	Pythiales	Pythiaceae	Pythium	Pythium monospermum	0	0	0	0	0	0	0	0	0	0	0	0	0	0	0	0	0	0	0	0	0	0	0	0	0	0	0	0	0	0	0	0	0	0	0	0	0	0	0	0	0	0
ASV185	Stramenopila	Heterokontophyta	Oomycetes	Pythiales	Pythiaceae	Pythium	Pythium mamillatum	0	0	0	0	42	0	0	0	0	0	0	192	0	0	0	0	0	0	0	0	0	0	0	0	0	110	111	17	25	0	187	214	230	226	0	0	0	0	0	36	0	58
ASV186			Dinophyceae	Prorocentrales	Prorocentraceae	Prorocentrum	Prorocentrum micans	0	0	0	0	0	0	0	0	0	0	0	0	0	0	0	0	73	0	0	0	0	0	0	0	0	0	0	0	0	0	0	0	0	0	0	0	0	0	0	0	0	0
ASV187	Stramenopila	Heterokontophyta	Oomycetes	Pythiales	Pythiaceae	Pythium	Pythium sp. unique2	0	0	0	0	0	0	0	0	0	0	0	0	0	0	2190	749	0	0	0	0	0	0	0	0	0	0	0	0	0	0	0	0	0	0	0	0	0	0	0	0	0	0
ASV188	Stramenopila	Heterokontophyta	Oomycetes	Saprolegniales	Saprolegniaceae	Aphanomyces	Aphanomyces sp.	0	0	0	0	0	0	0	0	0	0	0	0	0	0	0	0	0	0	0	0	0	0	0	0	0	0	0	0	0	0	0	56	0	0	0	0	0	0	0	0	0	0
ASV189	Metazoa	Chordata	Aves	Passeriformes	Fringillidae	Serinus	Serinus canaria	37	0	0	30	0	0	15	0	0	0	0	0	0	0	0	0	0	0	0	0	0	0	0	0	0	0	0	0	0	0	0	0	0	0	0	0	0	0	0	0	295	0
ASV190	Stramenopila	Heterokontophyta	Oomycetes	Myzocytiopsidales	Myzocytiopsidaceae	Myzocytiopsis	Myzocytiopsis sp. venatrix	0	0	0	0	0	0	0	0	0	0	0	0	0	0	0	0	0	0	0	0	0	0	0	0	0	0	0	0	0	0	0	0	0	0	0	2893	0	0	0	0	0	0
ASV191	Fungi	'uncultured fungus'	'uncultured fungus'	'uncultured fungus'	'uncultured fungus'	'uncultured fungus'	uncultured fungus	0	0	0	0	0	0	0	0	0	0	0	23	0	0	0	0	0	0	0	0	0	0	0	0	0	0	0	0	52	0	0	0	120	0	0	0	0	0	0	0	0	0
ASV192	Stramenopila	Heterokontophyta	Oomycetes	Leptomitales		Apodachlya	Apodachlya minima	43	0	0	0	0	0	0	0	0	0	0	0	0	0	0	0	0	446	0	0	0	0	0	33	364	0	0	0	0	0	0	264	0	0	0	0	0	0	0	0	0	0
ASV193	Fungi	'uncultured fungus'	'uncultured fungus'	'uncultured fungus'	'uncultured fungus'	'uncultured fungus'	uncultured fungus	0	0	0	0	0	0	0	0	0	0	0	0	0	0	0	0	0	0	0	0	0	0	0	0	0	0	0	0	0	0	0	0	0	0	0	0	0	0	0	0	0	0
ASV195	Stramenopila	Heterokontophyta	Oomycetes	Pythiales	Pythiaceae	Pythium	Pythium attrantheridium	0	162	0	0	251	231	0	360	0	0	0	232	0	0	0	0	0	0	0	0	134	0	0	0	268	0	0	69	0	0	0	0	0	0	0	0	0	0	0	133	0	0
ASV196	Stramenopila	Heterokontophyta	Oomycetes	Leptomitales		Apodachlya	Apodachlya minima	0	0	0	0	0	0	0	0	0	0	0	0	45	0	9	9	0	0	0	0	0	0	0	34	416	0	0	0	0	0	0	0	0	0	0	0	0	0	0	107	1305	0
ASV197			Dinophyceae	Prorocentrales	Prorocentraceae	Prorocentrum	Prorocentrum micans	0	27	0	0	0	11	48	0	0	0	0	51	0	0	0	0	0	0	0	0	64	35	134	0	40	0	0	43	0	0	0	0	0	193	0	0	0	44	0	23	0	0
ASV198	Stramenopila	Heterokontophyta	Oomycetes	Pythiales	Pythiaceae	Pythium	Pythium sp.	0	0	0	0	0	141	174	0	0	0	0	0	74	0	0	0	0	0	0	0	182	0	0	0	0	0	0	0	0	0	0	0	374	0	0	0	0	0	0	0	130	0
ASV199	Fungi	'uncultured fungus'	'uncultured fungus'	'uncultured fungus'	'uncultured fungus'	'uncultured fungus'	uncultured fungus	0	0	0	0	0	0	44	0	0	0	0	0	0	0	0	0	20	0	0	0	0	0	118	0	0	0	129	0	139	0	0	84	393	0	0	172	0	125	0	0	0	0
ASV200	Stramenopila	Heterokontophyta	Oomycetes	Pythiales	Pythiaceae	Pythium	Pythium sylvaticum	154	0	0	0	0	0	0	0	0	0	0	0	0	0	0	0	0	0	0	0	0	0	0	0	0	0	0	0	0	323	0	0	0	0	0	0	0	0	0	0	0	0
ASV201	Stramenopila	Heterokontophyta	Oomycetes	Peronosporales	Peronosporaceae	Hyaloperonospora	Hyaloperonospora cochleariae	0	0	0	0	0	0	0	0	0	0	207	17	0	248	0	0	0	30	17	23	0	0	0	0	0	73	0	0	0	0	0	23	45	9	50	0	0	33	0	94	0	31
ASV202	Fungi	'uncultured fungus'	'uncultured fungus'	'uncultured fungus'	'uncultured fungus'	'uncultured fungus'	uncultured fungus	0	0	0	0	0	0	0	0	0	0	0	0	0	0	0	0	0	0	0	0	0	0	11	0	0	0	0	0	0	0	0	0	0	0	0	0	90	0	0	0	0	0
ASV203			Chrysophyceae			Segregatospumella	Segregatospumella sp.	0	0	11	0	0	0	0	0	0	0	0	0	4	0	6	0	0	0	0	0	0	0	0	0	0	108	0	0	0	0	0	0	0	52	13	46	12	0	0	0	0	32
ASV204			Dinophyceae	Prorocentrales	Prorocentraceae	Prorocentrum	Prorocentrum micans	0	46	0	0	0	0	0	0	0	0	0	0	0	0	0	0	0	24	0	0	49	0	2	0	0	0	0	0	0	0	0	0	0	29	0	0	0	0	0	0	0	0
ASV205	Stramenopila	Heterokontophyta	Oomycetes			Haptoglossa	Haptoglossa zoospora	34	0	0	0	0	0	0	0	0	0	0	0	0	0	0	0	0	0	0	0	0	0	0	0	0	0	0	0	0	0	0	0	0	547	0	0	0	0	0	0	0	0
ASV206	Stramenopila	Heterokontophyta	Oomycetes	Saprolegniales	Saprolegniaceae	Saprolegnia	Saprolegnia sp. SAP1	0	0	0	145	0	0	0	0	0	0	0	0	0	0	0	0	0	0	0	0	0	0	0	0	0	0	0	0	0	0	0	0	0	0	0	0	0	0	0	0	0	0
ASV207	Stramenopila	Heterokontophyta	Oomycetes	Pythiales	Pythiaceae	Pythium	Pythium sp. unique1	0	0	0	0	0	0	0	0	0	0	0	0	1256	728	0	0	0	0	0	0	0	0	0	0	0	0	558	0	0	0	0	0	0	0	0	0	0	0	0	0	0	0
ASV208		Bacillariophyta	Bacillariophyceae	Surirellales	Surirellaceae	Surirella	Surirella sp. CCAP 1071/2	0	0	0	0	0	0	46	0	1941	424	0	0	0	0	0	0	0	0	0	0	0	0	0	26	0	0	0	0	0	0	0	0	0	0	0	0	0	0	0	0	0	0
ASV209	Stramenopila	Heterokontophyta	Oomycetes	Pythiales	Pythiaceae	Pythium	Pythium irregulare	0	0	0	0	0	0	0	0	0	0	0	0	0	0	0	0	0	0	0	0	127	0	0	0	0	67	0	0	0	0	0	21	0	0	0	0	0	0	0	0	0	566
ASV210	Viridiplantae	Streptophyta	Magnoliopsida	Malpighiales	Salicaceae	Populus	Populus trichocarpa	0	0	0	0	0	0	0	0	0	0	0	0	0	0	0	0	0	0	0	0	0	0	0	0	0	0	0	0	0	0	0	0	0	0	0	0	0	0	0	0	0	0
ASV211	Fungi	'uncultured fungus'	'uncultured fungus'	'uncultured fungus'	'uncultured fungus'	'uncultured fungus'	uncultured fungus	0	0	0	0	0	0	0	495	0	0	0	0	0	0	0	0	0	0	0	0	0	0	0	0	0	0	60	0	0	0	0	86	1387	0	0	0	0	0	0	0	0	0
ASV212	Stramenopila	Heterokontophyta	Oomycetes	Saprolegniales	Saprolegniaceae	Aphanomyces	Aphanomyces sp. APH1	0	0	0	0	0	0	0	0	2530	0	0	0	0	0	0	0	0	0	0	0	0	0	0	0	0	0	0	0	0	0	0	0	0	0	0	0	0	0	0	0	0	0
ASV213	Stramenopila	Heterokontophyta	Oomycetes	Pythiales	Pythiaceae	Pythium	Pythium conidiophorum	0	102	0	0	103	28	0	0	307	213	0	0	0	0	0	0	0	0	0	0	0	0	0	0	0	0	0	0	0	0	0	0	0	0	0	0	0	0	0	0	0	0
ASV214	Stramenopila	Heterokontophyta	Oomycetes	Pythiales	Pythiaceae	Pythium	Pythium dissotocum	0	0	127	191	0	0	0	0	0	0	0	0	0	0	205	73	0	0	0	0	0	0	0	286	0	0	0	0	0	0	0	0	0	0	0	0	673	0	0	0	0	0
ASV215	Metazoa	Chordata	Actinopteri	Osteoglossiformes	Osteoglossidae	Scleropages	Scleropages formosus	254	0	76	169	3	0	0	0	0	0	0	74	0	69	12	19	0	0	0	0	0	37	277	0	0	0	0	0	0	31	0	0	0	0	0	254	118	0	163	0	0	0
ASV216			Chrysophyceae	Chromulinales	Chromulinaceae	Pedospumella	Pedospumella sp. JBM19	0	44	0	0	0	0	0	0	77	40	0	0	0	0	0	0	0	0	0	0	0	0	0	0	10	0	1412	0	0	0	0	0	0	0	0	0	0	0	0	0	0	0
ASV217	Stramenopila	Heterokontophyta	Oomycetes	Pythiales	Pythiaceae	Pythium	Pythium pleroticum	0	0	0	0	0	0	0	0	0	0	0	0	0	0	0	0	0	0	0	0	0	1665	143	0	0	0	0	0	0	0	0	0	0	0	0	0	0	0	0	0	0	0
ASV218	Stramenopila	Heterokontophyta	Oomycetes	Pythiales	Pythiaceae	Pythium	Pythium heterothallicum	0	0	0	0	0	0	0	0	0	0	0	0	0	0	0	0	0	0	0	0	0	0	0	0	0	0	0	0	0	0	0	0	0	0	0	0	0	0	0	0	0	119
ASV219	Stramenopila	Heterokontophyta	Oomycetes	Pythiales	Pythiaceae	Globisporangium	Globisporangium intermedium	0	0	0	0	0	0	0	0	0	0	0	0	0	0	0	0	0	0	0	0	0	0	0	0	0	0	0	0	0	0	0	0	0	0	0	0	0	0	0	0	0	0
ASV220	Stramenopila	Heterokontophyta	Oomycetes	Pythiales	Pythiaceae	Pythium	Pythium attrantheridium	0	0	0	0	0	0	0	0	0	0	0	0	0	0	0	0	0	0	0	0	311	0	0	0	0	0	212	0	0	120	0	0	0	0	0	0	0	0	0	280	0	78
ASV221	Viridiplantae	Streptophyta	Magnoliopsida	Vitales	Vitaceae	Vitis	Vitis vinifera	0	0	0	0	0	0	0	0	0	0	0	0	0	0	0	0	0	0	0	0	0	0	0	0	0	0	0	0	0	0	0	0	0	0	0	0	0	0	0	0	0	0
ASV222			Chrysophyceae	Chromulinales	Chromulinaceae	Spumella	Spumella sp.	0	27	0	11	0	30	3	0	0	0	0	0	0	20	0	3	32	0	0	0	0	7	21	0	3	0	0	0	20	0	0	0	0	0	0	115	88	278	0	0	0	99
ASV223	Stramenopila	Heterokontophyta	Oomycetes		Lagenaceae	Lagena	Lagena radicicola	0	0	0	0	0	0	0	0	0	0	0	0	0	0	0	0	0	0	0	0	0	320	1588	0	0	0	0	0	0	0	0	0	0	0	0	0	0	0	0	0	0	0
ASV224	Stramenopila	Heterokontophyta	Oomycetes	Pythiales	Pythiaceae	Pythium	Pythium rhizosaccharum	0	116	0	0	17	0	0	210	22	221	0	0	0	0	0	0	0	0	0	0	0	0	0	0	0	0	0	0	0	0	0	0	0	0	0	0	0	0	0	0	0	0
ASV225	Stramenopila	Heterokontophyta	Oomycetes	Leptomitales		Apodachlya	Apodachlya minima	0	0	0	0	0	0	0	0	0	0	250	1025	0	0	0	0	0	0	0	0	0	0	0	0	0	0	0	0	0	0	0	0	0	0	0	0	0	0	0	0	0	0
ASV226	Stramenopila	Heterokontophyta	Oomycetes	Pythiales	Pythiaceae	Pythium	Pythium sp. 1 ROH-2015	0	0	0	0	0	0	0	0	0	0	0	0	0	0	0	0	24	0	0	0	0	0	0	0	0	0	0	0	0	0	0	0	0	0	0	0	0	0	0	0	0	0
ASV227	Fungi	'uncultured fungus'	'uncultured fungus'	'uncultured fungus'	'uncultured fungus'	'uncultured fungus'	uncultured fungus	0	0	0	0	0	0	0	0	0	0	0	0	0	0	0	0	0	0	0	0	0	0	0	0	0	0	0	0	0	0	0	0	0	0	0	0	0	169	0	0	0	0
ASV228			Dinophyceae	Prorocentrales	Prorocentraceae	Prorocentrum	Prorocentrum micans	0	0	0	0	14	0	0	0	0	0	0	34	113	161	0	0	0	0	100	0	20	0	0	0	0	0	20	6	0	0	0	0	0	0	152	0	0	0	0	82	0	0
ASV229	Stramenopila	Heterokontophyta	Oomycetes	Pythiales	Pythiaceae	Pythium	Pythium attrantheridium	0	0	0	0	0	0	0	0	0	0	0	132	0	0	0	0	0	0	0	0	0	0	0	0	0	0	0	0	0	0	0	0	0	0	0	0	0	0	0	0	0	0
ASV230	Stramenopila	Heterokontophyta	Oomycetes	Pythiales	Pythiaceae	Pythium	Pythium irregulare	0	0	0	0	0	0	0	0	0	0	0	0	0	60	0	0	0	0	0	0	81	0	0	0	0	0	62	0	57	0	0	0	57	0	0	0	0	0	0	0	0	225
ASV232	Stramenopila	Heterokontophyta	Oomycetes	Pythiales	Pythiaceae	Pythium	Pythium emineosum	0	0	0	0	0	0	0	0	0	0	0	0	0	0	0	0	0	0	0	0	0	0	0	0	0	0	0	0	0	0	0	144	129	0	0	0	0	0	0	0	0	0
ASV233	Stramenopila	Heterokontophyta	Oomycetes	Pythiales	Pythiaceae	Pythium	Pythium attrantheridium	0	0	0	0	0	0	0	0	0	0	0	0	0	148	0	0	0	0	0	0	127	0	0	0	0	0	0	51	266	0	190	0	0	0	0	0	0	0	0	206	0	0
ASV234			Chrysophyceae	Chromulinales	Chromulinaceae	Pedospumella	Pedospumella sp. JBM19	0	0	0	0	0	0	0	0	0	0	0	0	0	0	0	0	0	0	0	0	0	0	0	0	0	0	0	0	0	0	0	0	0	0	0	0	0	0	0	0	0	0
ASV235	Stramenopila	Heterokontophyta	Oomycetes	Pythiales	Pythiaceae	Pythium	Pythium parvum	0	105	0	0	0	0	0	0	0	0	0	0	0	0	0	0	0	0	0	0	119	0	0	50	515	0	0	0	0	0	0	0	0	0	0	0	0	0	0	0	0	0
ASV236	Stramenopila	Heterokontophyta	Oomycetes	Pythiales	Pythiaceae	Pythium	Pythium apiculatum	0	0	0	0	0	0	0	0	0	0	0	0	0	0	0	0	0	0	0	0	78	0	0	0	0	0	0	0	0	0	0	0	0	0	0	0	0	0	0	0	0	0
ASV237	Stramenopila	Heterokontophyta	Oomycetes	Pythiales	Pythiaceae	Pythium	Pythium dissimile	170	0	0	0	126	40	0	177	0	215	0	0	0	0	0	0	0	0	0	0	0	0	0	0	585	0	0	0	0	0	0	127	0	0	0	0	0	0	0	0	0	0
ASV238	Stramenopila	Heterokontophyta	Oomycetes			Haptoglossa	Haptoglossa zoospora	0	0	0	0	0	0	0	0	0	0	0	0	0	0	0	0	0	0	0	0	0	0	0	0	0	0	0	0	0	0	0	0	0	115	208	0	0	0	0	0	0	0
ASV239	Stramenopila	Heterokontophyta	Oomycetes	Pythiales	Pythiaceae	Pythium	Pythium irregulare	0	0	0	0	0	0	20	0	0	0	0	0	0	0	0	0	0	0	0	0	0	0	0	0	0	0	0	0	0	0	0	0	0	0	0	0	0	0	0	0	0	88
ASV240	Stramenopila	Heterokontophyta	Oomycetes	Saprolegniales	Saprolegniaceae	Aphanomyces	Aphanomyces cladogamus	296	714	4	0	0	31	60	215	0	0	0	0	99	0	0	0	0	0	0	0	54	0	0	0	0	0	0	0	0	0	0	0	0	0	0	0	0	0	0	0	0	0
ASV241	Fungi	'uncultured fungus'	'uncultured fungus'	'uncultured fungus'	'uncultured fungus'	'uncultured fungus'	uncultured fungus	0	0	0	0	0	0	0	0	0	0	0	0	0	0	0	0	0	0	0	0	0	0	0	0	0	0	0	0	155	0	0	0	0	0	0	341	0	0	0	0	0	0
ASV242			Chrysophyceae	Chromulinales	Chromulinaceae	'Spumella-like'	Spumella-like flagellate Got220	0	0	0	0	0	0	0	0	0	0	0	0	0	0	0	0	0	0	0	0	0	0	0	0	0	0	0	0	0	0	0	0	0	0	0	0	0	0	0	0	0	0
ASV243	Fungi	'uncultured fungus'	'uncultured fungus'	'uncultured fungus'	'uncultured fungus'	'uncultured fungus'	uncultured fungus	0	60	0	0	13	0	99	0	115	0	0	0	0	0	0	0	0	123	270	0	0	0	64	23	0	0	0	0	0	0	0	0	0	0	0	0	0	120	0	0	0	0
ASV244	Stramenopila	Heterokontophyta	Oomycetes	Leptomitales		Apodachlya	Apodachlya minima	0	0	0	0	0	0	0	0	0	0	0	0	21	0	0	0	0	0	0	0	0	0	0	0	0	0	0	0	0	0	0	152	0	0	0	0	0	208	248	0	0	0
ASV245			Chrysophyceae	Chromulinales	Chromulinaceae	'Spumella-like'	Spumella-like flagellate Got220	0	0	0	0	0	0	0	0	0	0	0	0	0	0	0	0	0	0	0	0	0	0	0	0	0	0	0	0	0	0	0	0	0	0	0	0	214	0	0	0	0	0
ASV246	Stramenopila	Heterokontophyta	Oomycetes	Pythiales	Pythiaceae	Pythium	Pythium mamillatum	25	0	0	0	23	0	0	0	0	0	62	0	0	0	0	0	0	0	75	68	10	0	0	0	0	392	53	0	54	0	115	80	24	230	36	0	0	0	0	0	0	0
ASV247			Chrysophyceae	Chromulinales	Chromulinaceae	Pedospumella	Pedospumella sp. JBM19	0	0	0	0	0	0	0	0	0	0	0	41	0	0	0	0	0	0	0	139	0	0	0	0	0	0	0	0	0	0	0	0	0	0	434	0	0	0	0	0	0	0
ASV248	Stramenopila	Heterokontophyta	Oomycetes	Pythiales	Pythiaceae	Pythium	Pythium heterothallicum	0	0	10	12	0	0	0	0	0	0	0	0	0	0	13	0	53	0	0	0	0	0	0	0	0	0	0	0	0	0	0	0	0	0	0	0	2019	0	0	0	0	0
ASV249			Chrysophyceae	Chromulinales	Chromulinaceae	'Spumella-like'	Spumella-like flagellate 1006	44	0	0	0	0	0	0	0	0	0	0	0	13	37	0	0	0	0	120	29	27	0	27	0	55	0	38	0	72	0	0	134	29	369	254	0	0	0	0	88	34	0
ASV250	Stramenopila	Heterokontophyta	Oomycetes	Pythiales	Pythiogetonaceae	Pythiogeton	Pythiogeton zizaniae	0	0	0	0	0	0	24	1766	240	0	0	0	0	0	0	0	0	0	0	0	0	0	0	0	0	0	0	0	0	0	0	0	0	0	0	0	0	0	0	0	0	0
ASV251	Viridiplantae	Streptophyta	Magnoliopsida	Malpighiales	Salicaceae	Populus	Populus trichocarpa	0	0	0	0	0	0	0	0	0	0	0	0	0	0	0	0	0	0	0	0	0	0	0	0	0	0	0	0	0	0	0	0	0	0	0	0	0	0	0	0	0	0
ASV252	Stramenopila	Heterokontophyta	Oomycetes	Saprolegniales	Saprolegniaceae	Dictyuchus	Dictyuchus monosporus	5	437	0	0	8	102	19	96	0	0	0	0	0	0	0	0	0	0	0	0	0	0	0	0	0	0	0	0	63	0	0	0	0	0	0	0	0	0	0	0	0	0
ASV253	Stramenopila	Heterokontophyta	Oomycetes	Pythiales	Pythiaceae	Pythium	Pythium heterothallicum	0	0	0	0	0	0	0	0	0	2071	0	0	0	0	0	0	0	0	0	0	0	0	0	0	0	0	0	0	0	0	0	0	0	0	0	0	0	0	0	0	0	0
ASV254	Stramenopila	Heterokontophyta	Oomycetes	Pythiales	Pythiaceae	Pythium	Pythium sp. unique1	49	183	0	0	53	209	0	0	0	0	0	0	0	0	0	0	0	0	0	0	0	0	0	0	0	0	0	0	0	0	0	0	0	0	0	0	0	0	0	0	0	0
ASV255	Fungi	'uncultured fungus'	'uncultured fungus'	'uncultured fungus'	'uncultured fungus'	'uncultured fungus'	uncultured fungus	0	0	0	0	0	0	0	0	0	0	0	37	0	0	0	0	0	0	0	0	0	0	0	0	0	0	0	0	0	0	0	0	0	0	0	0	0	0	0	0	0	0
ASV256			Chrysophyceae	Chromulinales	Chromulinaceae	'Spumella-like'	Spumella-like flagellate 194f	0	0	0	0	0	0	0	0	0	0	16	12	0	32	0	0	0	0	0	0	0	0	0	0	0	0	0	0	0	0	0	0	0	0	0	28	204	40	48	0	0	0
ASV257	Stramenopila	Heterokontophyta	Oomycetes	Peronosporales	Peronosporaceae	Phytophthora	Phytophthora quercina	0	0	353	1550	0	0	0	0	0	0	0	0	0	0	0	0	0	0	0	0	0	0	137	0	0	0	0	0	0	0	0	0	0	0	0	0	0	0	0	0	0	0
ASV258	Stramenopila	Heterokontophyta	Oomycetes	Peronosporales	Peronosporaceae	Phytophthora	Phytophthora quercina	0	0	349	1618	0	0	0	0	0	0	0	0	0	0	0	0	0	0	0	0	0	0	0	0	0	0	0	0	0	0	0	0	0	0	0	0	0	0	0	0	0	0
ASV259	Stramenopila	Heterokontophyta	Oomycetes	Pythiales	Pythiaceae	Globisporangium	Globisporangium intermedium	0	48	0	0	0	0	1064	65	0	0	0	0	0	0	0	0	0	0	0	0	0	0	0	117	40	0	0	0	0	0	0	0	0	0	0	0	0	0	0	0	0	0
ASV260		Bacillariophyta	Bacillariophyceae	Bacillariales	Bacillariaceae	Cylindrotheca	Cylindrotheca closterium	0	7	0	0	0	0	0	31	0	0	112	29	16	0	0	0	107	0	0	0	0	102	234	0	12	0	0	18	0	0	0	12	201	0	0	0	0	0	53	0	0	0
ASV261	Stramenopila	Heterokontophyta	Oomycetes	Pythiales	Pythiaceae	Pythium	Pythium rostratum	0	0	0	0	0	0	0	0	0	0	0	0	0	0	0	0	0	0	0	0	0	0	0	0	93	0	0	0	0	0	0	325	0	0	0	0	0	0	0	0	0	0
ASV262	Stramenopila	Heterokontophyta	Oomycetes	Pythiales	Pythiaceae	Pythium	Pythium attrantheridium	0	0	0	0	0	0	0	0	0	0	0	0	0	0	0	0	0	100	0	0	0	0	0	0	44	0	0	0	0	0	0	0	260	0	0	0	0	87	0	0	257	0
ASV263	Stramenopila	Heterokontophyta	Oomycetes	Pythiales	Pythiaceae	Pythium	Pythium irregulare	0	0	0	0	0	0	0	0	0	0	0	0	0	0	0	0	0	0	0	0	0	0	0	0	0	0	0	0	0	0	0	0	0	0	0	0	0	0	0	0	0	0
ASV264	Stramenopila	Heterokontophyta	Oomycetes			Haptoglossa	Haptoglossa zoospora	72	0	0	0	0	0	0	0	0	0	0	0	0	0	0	0	0	0	0	0	0	0	0	0	0	0	0	0	0	0	0	0	0	511	0	0	0	0	0	0	0	0
ASV265			Dinophyceae	Prorocentrales	Prorocentraceae	Prorocentrum	Prorocentrum micans	43	0	0	0	0	0	0	0	0	0	20	0	0	0	0	0	0	0	0	0	0	0	0	0	0	0	0	0	0	0	0	0	0	0	0	0	0	0	0	0	0	0
ASV266	Stramenopila	Heterokontophyta	Oomycetes	Pythiales	Pythiaceae	Pythium	Pythium sylvaticum	0	0	0	0	0	0	87	0	0	0	0	203	0	0	0	0	0	123	0	0	0	0	0	0	0	0	0	0	0	0	0	0	0	0	0	0	0	0	0	0	0	0
ASV267	Stramenopila	Heterokontophyta	Oomycetes	Pythiales	Pythiaceae	Phytopythium	Phytopythium vexans	0	0	0	0	0	0	0	0	0	0	0	0	0	0	0	0	0	0	0	0	0	0	0	0	0	0	0	0	0	0	0	0	0	0	0	0	0	0	0	133	72	0
ASV268	Fungi	'uncultured fungus'	'uncultured fungus'	'uncultured fungus'	'uncultured fungus'	'uncultured fungus'	uncultured fungus	0	0	0	0	0	0	0	0	0	0	0	0	0	0	0	0	0	0	0	0	0	0	0	0	0	0	0	0	0	0	0	0	0	0	0	0	0	0	0	0	0	0
ASV269			Chrysophyceae			'Spumella-like'	Spumella-like flagellate JBL14	0	15	0	0	0	0	0	19	0	18	131	0	0	1057	0	0	0	14	0	0	0	0	0	0	26	104	10	0	73	0	0	0	93	32	0	17	0	0	0	0	0	0
ASV270	Viridiplantae	Streptophyta	Magnoliopsida	Malpighiales	Salicaceae	Populus	Populus trichocarpa	0	0	0	0	0	0	0	0	0	0	0	0	0	0	0	0	0	0	0	0	0	0	0	0	0	0	0	0	0	0	0	0	0	0	0	0	0	0	0	0	0	0
ASV271	Stramenopila	Heterokontophyta	Oomycetes	Pythiales	Pythiaceae	Globisporangium	Globisporangium intermedium	0	43	0	0	0	0	638	0	522	75	0	0	0	0	0	0	0	0	0	0	0	0	0	126	0	0	0	0	0	0	0	0	0	0	0	0	0	0	0	0	0	0
ASV272	Stramenopila	Heterokontophyta	Oomycetes	Pythiales	Pythiaceae	Pythium	Pythium volutum	0	0	0	0	0	0	0	0	0	0	0	0	0	0	0	0	0	0	0	0	0	0	0	0	0	0	0	0	0	0	0	0	0	0	0	0	0	0	0	0	0	0
ASV273	Stramenopila	Heterokontophyta	Oomycetes	Pythiales	Pythiaceae	Phytopythium	Phytopythium sp. SL-2017a	0	249	357	796	0	0	0	0	0	0	0	0	0	0	0	0	0	0	0	0	0	0	0	0	0	0	0	0	0	0	0	0	0	0	0	0	0	0	0	0	0	0
ASV274	Stramenopila	Heterokontophyta	Oomycetes	Pythiales	Pythiaceae	Pythium	Pythium anandrum	0	0	0	0	0	0	0	149	153	121	103	18	0	110	0	0	0	0	0	0	0	0	0	0	0	0	0	0	25	0	0	0	0	0	31	0	0	39	0	117	35	0
ASV275	Stramenopila	Heterokontophyta	Oomycetes	Saprolegniales	Saprolegniaceae	Plectospira	Plectospira myriandra	121	0	0	0	0	0	0	483	0	436	0	0	8	535	0	0	0	0	0	0	0	0	0	0	0	0	0	0	0	0	0	0	0	0	0	0	0	0	0	0	0	0
ASV276			Chrysophyceae	Chromulinales	Chromulinaceae	Spumella	Spumella sp.	0	0	0	0	0	0	0	0	0	0	77	0	0	0	0	0	0	0	0	0	0	104	0	0	0	22	0	0	0	0	0	0	0	0	0	91	121	0	0	62	0	50
ASV277	Stramenopila	Heterokontophyta	Oomycetes	Pythiales	Pythiaceae	Pythium	Pythium sp. B65	0	88	0	0	61	0	0	0	0	0	0	0	0	0	0	0	0	0	0	0	0	0	0	273	75	0	0	0	0	0	0	0	0	0	0	0	0	0	0	0	0	0
ASV278	Stramenopila	Heterokontophyta	Oomycetes	Lagenidiales	Haliphthoraceae	Atkinsiella	Atkinsiella dubia	0	0	0	0	0	0	0	0	0	0	0	0	7	0	0	0	0	23	0	0	0	0	0	0	0	0	0	0	0	0	0	0	0	0	0	0	0	0	0	236	53	0
ASV279	Stramenopila	Heterokontophyta	Oomycetes	Pythiales	Pythiaceae	Globisporangium	Globisporangium paroecandrum	0	0	0	0	0	0	0	0	0	0	0	0	0	0	0	0	0	0	0	0	0	0	0	0	0	0	0	0	0	0	0	0	0	0	0	0	0	0	0	0	0	0
ASV280	Stramenopila	Heterokontophyta	Oomycetes			Haptoglossa	Haptoglossa sp. SL20	0	0	0	0	0	0	0	0	0	0	0	0	0	0	0	9	0	0	0	0	0	0	165	0	0	0	0	0	0	0	0	0	0	0	0	0	0	0	0	0	0	0
ASV281	Stramenopila	Heterokontophyta	Oomycetes	Pythiales	Pythiaceae	Pythium	Pythium vanterpoolii	0	44	0	0	0	0	0	81	0	247	0	0	133	153	0	0	0	0	0	0	0	0	0	0	39	0	0	0	0	0	0	0	0	0	0	0	0	0	0	0	0	0
ASV282	Stramenopila	Heterokontophyta	Oomycetes	Pythiales	Pythiaceae	Pythium	Pythium rostratum	0	22	0	0	0	4	0	66	0	0	0	0	0	0	0	0	0	0	0	0	0	0	0	0	0	0	0	0	0	0	0	0	260	0	0	0	0	0	0	0	0	0
ASV283	Stramenopila	Heterokontophyta	Oomycetes		Lagenaceae	Lagena	Lagena radicicola	0	0	0	0	0	0	0	0	0	0	0	0	0	0	0	0	0	0	0	0	0	0	0	0	134	0	0	0	0	0	0	0	0	0	0	0	0	0	0	0	0	725
ASV284	Fungi	'uncultured fungus'	'uncultured fungus'	'uncultured fungus'	'uncultured fungus'	'uncultured fungus'	uncultured fungus	0	0	0	0	0	0	0	0	0	0	0	0	0	0	0	0	0	0	0	0	0	0	0	0	0	0	0	0	0	0	0	0	0	0	0	0	0	0	0	0	0	0
ASV285	Fungi	'uncultured fungus'	'uncultured fungus'	'uncultured fungus'	'uncultured fungus'	'uncultured fungus'	uncultured fungus	7	0	0	0	0	4	0	0	0	0	0	21	49	290	0	0	0	16	0	0	11	0	0	0	0	9	16	0	25	0	0	10	0	0	0	0	0	51	12	154	51	0
ASV286	Stramenopila	Heterokontophyta	Oomycetes	Pythiales	Pythiaceae	Phytopythium	Phytopythium vexans	0	0	0	0	0	0	0	0	0	0	0	0	0	0	0	0	0	0	0	0	0	0	0	0	0	0	0	0	0	0	0	0	0	0	0	0	0	971	623	0	0	83
ASV287	Stramenopila	Heterokontophyta	Oomycetes	Saprolegniales	Saprolegniaceae	Aphanomyces	Aphanomyces astaci	0	0	0	0	0	0	0	0	0	0	0	115	0	0	0	0	0	0	0	0	0	0	0	0	0	0	0	0	0	0	0	0	1560	0	0	0	0	0	0	0	0	0
ASV288	Stramenopila	Heterokontophyta	Oomycetes	Pythiales	Pythiaceae	Pythium	Pythium irregulare	0	0	0	0	0	0	0	0	0	0	0	0	26	0	0	0	0	0	0	0	0	0	0	0	0	0	22	0	0	0	0	0	0	0	0	0	0	0	0	0	0	175
ASV289	Stramenopila	Heterokontophyta	Oomycetes	Pythiales	Pythiaceae	Pythium	Pythium emineosum	0	0	0	0	0	0	0	0	0	0	0	0	0	0	0	0	0	0	0	0	0	0	0	0	0	0	0	0	0	0	0	0	0	0	0	0	0	0	0	0	0	0
ASV290	Stramenopila	Heterokontophyta	Oomycetes	Pythiales	Pythiaceae	Pythium	Pythium irregulare	0	0	0	0	0	0	0	0	0	0	0	0	41	97	0	0	0	0	0	0	72	0	0	0	0	0	0	0	0	0	0	0	0	0	0	0	0	0	0	0	0	0
ASV291	Stramenopila	Heterokontophyta	Oomycetes	Leptomitales		Apodachlya	Apodachlya brachynema	0	0	91	0	0	0	0	0	0	0	0	455	0	0	0	0	0	0	0	0	0	0	0	26	0	0	0	0	0	0	0	0	0	0	0	0	0	0	0	0	0	0
ASV292			Chrysophyceae	Chromulinales	Chromulinaceae	'Spumella-like'	Spumella-like flagellate 194f	0	0	0	0	0	0	0	0	0	0	0	0	0	0	0	0	0	0	0	0	0	0	0	0	0	0	0	0	0	0	0	0	0	0	0	0	153	0	0	0	0	0
ASV293	Stramenopila	Heterokontophyta	Oomycetes			Haptoglossa	Haptoglossa zoospora	0	0	0	0	0	0	0	0	0	0	307	132	0	0	0	0	0	0	0	0	0	0	0	0	0	0	235	0	403	0	0	0	0	0	0	0	0	0	0	0	0	0
ASV294	Stramenopila	Heterokontophyta	Oomycetes			Haptoglossa	Haptoglossa sp. SL20	0	0	0	0	0	0	0	0	0	0	0	0	0	0	0	0	0	0	0	0	0	0	0	0	0	0	0	0	0	0	0	0	0	0	0	0	0	0	0	0	0	0
ASV295	Stramenopila	Heterokontophyta	Oomycetes	Pythiales	Pythiaceae	Pythium	Pythium sp. FL-2016f	0	0	0	0	245	0	0	0	0	0	0	0	0	0	0	0	0	0	0	0	0	0	0	0	0	0	0	0	0	0	0	0	0	0	0	0	0	0	0	0	0	0
ASV296	Stramenopila	Heterokontophyta	Oomycetes		Lagenaceae	Lagena	Lagena radicicola	0	0	0	0	0	0	0	149	0	0	0	0	0	0	0	0	0	0	0	0	0	0	0	0	0	0	0	0	0	0	0	0	0	0	0	0	0	0	0	0	0	0
ASV297	Stramenopila	Heterokontophyta	Oomycetes	Pythiales	Pythiaceae	Pythium	Pythium aff. rostratum	0	0	166	0	0	0	0	0	0	0	0	0	0	0	0	0	0	0	0	0	0	0	0	6	0	0	0	0	0	0	0	0	0	0	0	0	0	0	0	0	0	0
ASV298	Stramenopila	Heterokontophyta	Oomycetes	Pythiales	Pythiaceae	Pythium	Pythium aff. monospermum	0	0	0	0	25	78	0	0	0	0	0	0	0	0	0	0	0	0	0	0	0	0	0	0	0	0	0	163	0	0	0	0	0	0	0	0	0	0	0	0	0	0
ASV299	Stramenopila	Heterokontophyta	Oomycetes	Albuginales	Albuginaceae	Albugo	Albugo laibachii	0	0	0	0	0	0	0	0	0	0	0	0	0	0	0	0	0	0	0	0	0	0	0	0	0	0	1462	0	0	0	0	0	0	0	0	0	0	0	0	0	115	0
ASV300	Stramenopila	Heterokontophyta	Oomycetes	Saprolegniales	Saprolegniaceae	Saprolegnia	Saprolegnia sp. SAP4	0	0	521	1034	0	0	0	0	0	0	0	0	0	0	22	0	0	0	0	0	0	0	0	0	0	0	0	0	0	0	0	0	0	0	0	0	0	0	0	0	0	0
ASV301	Stramenopila	Heterokontophyta	Oomycetes	Peronosporales	Peronosporaceae	Hyaloperonospora	Hyaloperonospora cochleariae	0	0	0	0	0	0	0	0	0	0	0	0	0	0	0	0	0	0	0	0	0	0	0	0	0	0	0	0	0	0	0	0	0	0	0	0	0	0	0	0	0	0
ASV302	Stramenopila	Heterokontophyta	Oomycetes	Pythiales	Pythiaceae	Pythium	Pythium violae	0	0	0	0	0	18	55	214	55	267	0	0	0	0	0	0	0	0	0	0	0	0	0	41	72	0	0	0	0	0	0	0	0	0	0	0	0	0	0	0	0	0
ASV303	Stramenopila	Heterokontophyta	Oomycetes	Pythiales	Pythiaceae	Pythium	Pythium sylvaticum	0	0	0	0	0	0	0	0	0	0	0	0	0	0	0	0	0	0	0	0	0	40	59	0	0	0	0	0	0	0	0	0	0	0	0	0	0	0	0	0	0	0
ASV304	Stramenopila	Heterokontophyta	Oomycetes	Pythiales	Pythiaceae	Pythium	Pythium spiculum	0	0	0	0	0	0	0	0	0	0	0	169	0	0	0	0	0	0	0	0	0	0	0	0	0	0	0	86	0	0	0	0	0	0	0	0	0	0	0	0	49	0
ASV305			Chrysophyceae			'Spumella-like'	Spumella-like flagellate JBC/S24	75	0	0	0	0	0	12	0	0	147	0	0	0	0	0	0	0	0	0	0	0	44	92	0	0	0	74	0	0	0	0	102	292	0	0	0	0	0	0	0	201	0
ASV306	Stramenopila	Heterokontophyta	Oomycetes	Pythiales	Pythiaceae	Pythium	Pythium terrestris	0	0	0	0	238	0	0	0	0	0	127	0	0	0	0	0	0	0	0	0	0	0	0	0	0	0	0	0	0	99	0	0	0	0	0	0	0	0	0	0	0	0
ASV307	Stramenopila	Heterokontophyta	Oomycetes	Pythiales	Pythiaceae	Pythium	Pythium emineosum	0	0	0	0	0	0	0	0	0	0	0	0	0	0	0	0	0	0	0	0	0	0	0	0	0	0	0	0	0	0	0	0	0	0	0	0	0	0	0	0	0	0
ASV308			Chrysophyceae			Segregatospumella	Segregatospumella sp.	0	0	37	22	0	0	0	6	0	0	0	0	0	0	0	0	0	0	0	0	0	0	0	0	0	132	0	0	0	0	0	0	33	0	27	347	567	0	0	0	36	0
ASV309	Fungi	'uncultured fungus'	'uncultured fungus'	'uncultured fungus'	'uncultured fungus'	'uncultured fungus'	uncultured fungus	0	0	0	0	0	0	0	0	0	0	0	0	0	0	0	35	0	0	0	0	8	0	0	0	0	0	0	0	0	0	0	0	0	0	0	0	13	0	0	0	0	0
ASV310	Fungi	'uncultured fungus'	'uncultured fungus'	'uncultured fungus'	'uncultured fungus'	'uncultured fungus'	uncultured fungus	0	0	0	0	0	0	0	0	0	0	0	0	72	0	0	0	0	0	0	0	0	0	0	0	0	0	0	98	0	0	0	0	328	0	0	0	0	0	0	0	0	0
ASV311			Chrysophyceae	Chromulinales	Chromulinaceae	'Spumella-like'	Spumella-like flagellate Got220	0	0	0	0	0	0	0	0	0	0	0	0	0	0	0	0	0	0	0	0	0	0	0	0	0	0	0	0	0	0	1492	0	0	0	0	0	0	0	0	0	0	0
ASV312	Stramenopila	Heterokontophyta	Oomycetes	Pythiales	'uncultured Pythium'	'uncultured Pythium'	uncultured Pythium	0	103	0	0	74	20	76	164	0	0	0	0	0	0	0	0	0	0	0	0	0	0	0	0	53	0	0	0	0	0	0	0	0	0	0	0	0	160	0	0	0	0
ASV313	Stramenopila	Heterokontophyta	Oomycetes			Haptoglossa	Haptoglossa zoospora	0	0	24	0	0	0	0	0	0	0	0	0	0	0	0	0	0	0	0	0	0	0	0	0	0	0	0	0	0	0	0	0	0	0	0	933	436	0	0	0	0	0
ASV314			Chrysophyceae			'Spumella-like'	Spumella-like flagellate JBC/S24	59	0	0	0	19	0	14	0	338	85	196	0	41	65	0	0	0	0	0	0	14	0	87	0	0	0	0	0	0	0	0	14	102	0	0	0	0	0	0	0	71	0
ASV315	Stramenopila	Heterokontophyta	Oomycetes	Pythiales	Pythiaceae	Pythium	Pythium emineosum	0	0	0	0	0	0	0	0	0	0	0	0	0	0	0	0	0	0	0	0	0	0	0	0	0	0	0	0	0	0	0	0	0	0	0	0	0	0	0	0	0	0
ASV316	Stramenopila	Heterokontophyta	Oomycetes	Pythiales	Pythiaceae	Pythium	Pythium heterothallicum	0	0	0	0	0	0	227	0	0	0	0	0	0	0	0	0	0	0	0	0	0	0	0	0	0	0	0	0	0	0	0	0	0	0	0	0	0	0	0	0	0	0
ASV317	Metazoa	Chordata	Mammalia	Primates	Hominidae	Homo	Homo sapiens	0	0	0	0	0	0	0	0	0	0	0	0	0	0	0	0	0	0	0	106	0	0	0	0	0	0	114	0	0	0	0	0	377	0	0	0	0	0	0	122	99	0
ASV318			Chrysophyceae	Chromulinales	Chromulinaceae	Spumella	Spumella sp.	0	0	0	0	0	0	0	0	0	0	0	0	0	0	0	0	34	0	0	0	0	77	75	0	0	0	0	0	0	0	0	9	0	0	0	0	49	0	0	0	0	0
ASV319	Fungi	'uncultured fungus'	'uncultured fungus'	'uncultured fungus'	'uncultured fungus'	'uncultured fungus'	uncultured fungus	0	0	0	0	0	0	0	0	0	0	0	0	193	554	0	0	0	0	0	0	181	0	0	0	31	0	0	20	0	0	0	0	0	0	0	0	0	0	0	52	64	0
ASV320	Stramenopila	Heterokontophyta	Oomycetes	Saprolegniales	Saprolegniaceae	Saprolegnia	Saprolegnia sp. SAP4	0	0	0	0	0	0	0	0	0	0	0	0	0	0	0	0	0	0	0	0	0	0	0	0	0	0	0	12	0	0	0	0	0	0	0	0	0	0	0	0	0	0
ASV321	Stramenopila	Heterokontophyta	Oomycetes	Pythiales	Pythiaceae	Pythium	Pythium irregulare	0	0	0	0	0	0	0	0	0	0	0	0	0	0	0	0	0	33	0	0	0	0	0	0	0	37	0	0	0	0	0	0	0	0	0	0	0	0	0	0	0	67
ASV322	Stramenopila	Heterokontophyta	Oomycetes	Pythiales	Pythiaceae	Phytopythium	Phytopythium citrinum	0	872	0	0	0	0	0	0	0	0	0	0	0	0	0	0	0	0	0	0	0	0	0	0	0	0	0	0	0	0	0	0	0	0	0	0	0	0	0	0	0	0
ASV323	Metazoa	Chordata	Actinopteri		Sciaenidae	Larimichthys	Larimichthys crocea	0	0	0	0	0	0	0	0	0	0	0	0	0	0	0	0	0	42	0	0	0	0	0	0	15	235	34	0	38	0	0	0	117	0	0	0	0	0	0	219	113	0
ASV324			Chrysophyceae			'Spumella-like'	Spumella-like flagellate JBL14	0	0	0	0	0	0	0	0	0	0	0	0	0	0	0	0	0	0	0	17	0	0	0	0	0	0	0	0	0	0	0	0	0	0	0	0	0	0	0	0	0	0
ASV325	Stramenopila	Heterokontophyta	Oomycetes	Lagenidiales	Lagenidiaceae	Lagenidium	Lagenidium sp. SLG-2014b	0	0	0	0	0	52	0	0	0	0	0	0	0	0	0	0	0	0	0	0	0	0	603	0	0	0	0	149	0	0	0	0	0	0	0	0	0	0	0	0	143	0
ASV326	Stramenopila	Heterokontophyta	Oomycetes			Haptoglossa	Haptoglossa zoospora	0	0	0	0	0	0	0	0	0	0	0	0	0	0	0	0	0	0	0	0	0	0	0	0	0	0	0	0	0	0	0	0	0	184	253	0	0	0	0	0	0	0
ASV327		Bacillariophyta	Bacillariophyceae	Surirellales	Surirellaceae	Surirella	Surirella sp. CCAP 1071/2	0	0	0	0	0	179	0	0	0	681	0	0	0	0	0	0	0	0	0	0	0	0	0	0	0	0	0	0	0	0	0	0	0	0	0	0	0	0	0	0	0	0
ASV328	Stramenopila	Heterokontophyta	Oomycetes	Pythiales	Pythiaceae	Pythium	Pythium pectinolyticum	0	0	0	0	513	0	0	0	0	0	0	0	0	0	0	0	0	0	0	0	0	0	0	0	0	0	0	0	0	0	0	0	0	0	0	0	0	0	0	0	0	0
ASV329	Stramenopila	Heterokontophyta	Oomycetes	Peronosporales	Peronosporaceae	Phytophthora	Phytophthora quercina	0	0	279	1119	0	0	0	0	0	0	0	0	0	0	0	0	0	0	0	0	0	0	0	0	0	0	0	0	0	0	0	0	0	0	0	0	0	0	0	0	0	0
ASV330	Fungi	'uncultured fungus'	'uncultured fungus'	'uncultured fungus'	'uncultured fungus'	'uncultured fungus'	uncultured fungus	0	0	0	0	0	0	0	0	0	0	0	0	0	0	0	0	0	0	0	0	0	250	51	0	0	0	0	0	0	0	0	0	0	0	0	0	10	0	0	0	0	0
ASV331	Fungi	'uncultured fungus'	'uncultured fungus'	'uncultured fungus'	'uncultured fungus'	'uncultured fungus'	uncultured fungus	0	0	0	0	0	0	25	711	0	0	0	0	0	0	0	0	0	0	0	0	0	0	0	0	0	0	190	0	0	0	0	0	0	0	0	0	0	0	0	0	0	0
ASV332			Chrysophyceae	Chromulinales	Chromulinaceae	'Spumella-like'	Spumella-like flagellate Got220	0	0	1213	181	0	0	0	0	0	0	0	0	0	0	0	0	0	0	0	0	0	0	0	0	0	0	0	0	0	0	0	0	0	0	0	0	0	0	0	0	0	0
ASV333	Stramenopila	Heterokontophyta	Oomycetes	Leptomitales		Apodachlya	Apodachlya minima	0	0	0	0	0	0	0	0	0	0	249	253	0	0	0	0	0	0	0	0	0	0	0	47	0	0	0	0	0	0	0	0	0	0	0	0	0	0	0	0	0	0
ASV334	Stramenopila	Heterokontophyta	Oomycetes	Peronosporales	Peronosporaceae	Phytophthora	Phytophthora tubulina	0	0	211	1166	0	0	0	0	0	0	0	0	0	0	0	0	0	0	0	0	0	0	0	0	0	0	0	0	0	0	0	0	0	0	0	0	0	0	0	0	0	0
ASV335	Fungi	'uncultured fungus'	'uncultured fungus'	'uncultured fungus'	'uncultured fungus'	'uncultured fungus'	uncultured fungus	0	0	0	0	0	0	0	0	0	0	0	0	0	0	0	0	0	0	0	272	0	0	201	0	0	0	0	0	0	0	0	0	0	0	0	0	0	0	0	0	0	0
ASV336		Bacillariophyta	Bacillariophyceae	Surirellales	Surirellaceae	Surirella	Surirella sp. CCAP 1071/2	0	53	0	0	0	0	0	208	553	459	0	0	0	0	0	0	0	0	0	0	0	0	0	0	91	0	0	0	0	0	0	0	0	0	0	0	0	0	0	0	0	0
ASV337	Stramenopila	Heterokontophyta	Oomycetes	Saprolegniales	Saprolegniaceae	Saprolegnia	Saprolegnia furcata	0	0	0	0	0	0	0	0	0	0	0	0	0	0	0	0	0	0	0	0	0	0	0	0	0	0	0	0	0	0	0	0	0	169	0	0	0	0	0	0	0	0
ASV338	Stramenopila	Heterokontophyta	Oomycetes	Pythiales	Pythiaceae	Pythium	Pythium sp.	0	0	0	0	0	0	161	0	0	0	0	0	0	0	0	0	0	0	0	0	47	0	0	0	0	164	0	0	0	0	0	0	0	0	0	0	0	0	0	0	598	0
ASV339	Stramenopila	Heterokontophyta	Oomycetes			Haptoglossa	Haptoglossa zoospora	0	0	271	116	0	0	0	0	0	0	0	0	0	0	0	256	0	0	0	0	0	0	0	0	0	0	0	0	0	0	0	0	0	0	0	112	396	0	0	0	0	0
ASV340	Fungi	'uncultured fungus'	'uncultured fungus'	'uncultured fungus'	'uncultured fungus'	'uncultured fungus'	uncultured fungus	0	0	0	0	0	0	0	0	0	0	0	0	5	97	0	0	0	14	0	0	0	0	0	0	0	27	19	0	0	0	0	28	394	0	0	0	0	0	0	54	8	0
ASV341	Stramenopila	Heterokontophyta	Oomycetes	Leptomitales		Apodachlya	Apodachlya minima	0	0	0	0	0	0	0	0	0	0	0	0	0	0	0	0	0	0	0	0	0	0	0	0	0	0	0	0	0	0	0	0	0	0	0	0	0	0	0	0	0	0
ASV342	Stramenopila	Heterokontophyta	Oomycetes	Leptomitales		Apodachlya	Apodachlya minima	0	0	0	0	0	0	0	0	0	0	0	0	112	561	0	0	0	0	0	0	0	0	0	0	0	0	0	0	0	0	0	0	384	0	0	0	0	0	0	0	0	0
ASV343	Stramenopila	Heterokontophyta	Oomycetes	Pythiales	Pythiaceae	Pythium	Pythium megalacanthum	0	0	0	0	0	0	0	0	0	0	0	0	0	0	0	0	0	0	0	0	0	0	0	0	0	0	0	0	0	0	0	0	0	0	0	0	0	0	0	0	0	0
ASV344	Stramenopila	Heterokontophyta	Oomycetes	Pythiales	Pythiaceae	Pythium	Pythium sp.	66	112	0	0	0	0	0	145	0	0	0	0	0	659	0	0	0	0	0	0	0	0	0	0	214	0	0	0	0	0	0	0	0	0	0	0	0	0	0	0	0	0
ASV345	Stramenopila	Heterokontophyta	Oomycetes	Pythiales	Pythiaceae	Pythium	Pythium sp. CAL-2011f	0	0	0	0	0	0	47	0	191	0	0	0	0	0	0	0	0	0	0	0	0	0	0	0	0	218	0	0	0	0	0	0	0	0	0	0	0	116	0	0	0	0
ASV346			Chrysophyceae	Chromulinales	Chromulinaceae	'Spumella-like'	Spumella-like flagellate 194f	0	0	0	0	0	0	0	0	0	0	0	0	0	0	0	0	0	0	0	0	0	0	0	0	0	0	0	0	0	0	0	0	18	0	29	0	0	0	0	0	0	0
ASV347	Stramenopila	Heterokontophyta	Oomycetes			Haptoglossa	Haptoglossa zoospora	0	0	164	200	0	0	0	0	0	0	0	0	0	0	0	139	13	0	0	0	0	0	0	0	0	0	0	0	0	0	0	0	0	0	0	314	292	0	0	0	0	0
ASV348	Stramenopila	Heterokontophyta	Oomycetes	Pythiales	Pythiaceae	Pythium	Pythium emineosum	0	0	0	0	0	0	0	0	0	0	0	0	0	0	0	0	0	0	0	0	0	0	0	0	0	0	0	0	0	27	0	0	64	0	0	0	0	0	0	0	0	0
ASV349			Chrysophyceae	Chromulinales	Chromulinaceae	'Spumella-like'	Spumella-like flagellate 1031	0	0	0	0	0	6	0	45	5	30	91	0	0	0	0	0	0	22	3	0	0	0	0	0	0	252	0	6	34	0	0	0	64	0	0	0	0	0	0	0	0	0
ASV350	Stramenopila	Heterokontophyta	Oomycetes	Leptomitales		Apodachlya	Apodachlya minima	0	0	0	0	0	0	0	0	0	0	0	0	0	0	0	0	0	0	0	0	0	0	0	0	0	0	0	0	0	0	0	0	0	0	0	0	0	0	0	0	0	0
ASV351	Fungi	'uncultured fungus'	'uncultured fungus'	'uncultured fungus'	'uncultured fungus'	'uncultured fungus'	uncultured fungus	360	93	0	33	0	0	0	0	0	0	0	0	0	0	0	0	0	0	0	0	0	0	0	0	0	120	628	0	0	0	0	0	0	0	0	0	0	0	39	0	0	0
ASV352	Fungi	'uncultured fungus'	'uncultured fungus'	'uncultured fungus'	'uncultured fungus'	'uncultured fungus'	uncultured fungus	0	0	0	0	0	0	0	0	0	0	0	0	0	0	0	0	0	0	0	0	0	0	0	0	0	0	0	0	0	0	0	0	0	0	0	0	0	0	0	0	0	0
ASV353	Fungi	'uncultured fungus'	'uncultured fungus'	'uncultured fungus'	'uncultured fungus'	'uncultured fungus'	uncultured fungus	0	0	0	0	0	0	0	0	0	0	0	0	0	0	0	0	0	0	0	0	0	0	0	0	0	0	0	0	0	0	0	0	0	0	0	0	0	0	0	0	0	0
ASV354	Stramenopila	Heterokontophyta	Oomycetes	Peronosporales	Peronosporaceae	Phytophthora	Phytophthora nicotianae	0	0	0	0	0	0	0	0	0	0	0	0	0	0	0	0	0	0	0	0	0	0	0	0	0	0	0	0	0	0	0	0	0	0	0	0	0	0	0	0	0	0
ASV355	Stramenopila	Heterokontophyta	Oomycetes	Peronosporales	Peronosporaceae	Hyaloperonospora	Hyaloperonospora cochleariae	0	0	0	0	0	0	0	0	0	0	0	0	0	0	0	0	0	0	0	0	0	0	0	0	0	0	0	0	0	0	0	0	0	0	0	0	0	0	0	0	0	0
ASV356	Stramenopila	Heterokontophyta	Oomycetes	Pythiales	Pythiaceae	Pythium	Pythium aristosporum	0	0	0	0	0	0	0	0	0	181	0	0	0	0	0	0	0	0	0	0	0	0	0	0	0	0	1073	0	0	0	0	0	0	0	0	0	0	0	0	0	0	0
ASV357			Chrysophyceae	Chromulinales	Chromulinaceae	Spumella	Spumella sp.	0	0	0	0	0	0	0	0	0	0	0	0	0	15	0	0	0	0	0	0	0	0	0	0	0	0	0	0	0	0	0	0	0	0	0	0	0	0	0	0	0	0
ASV358	Stramenopila	Heterokontophyta	Oomycetes	Saprolegniales	Saprolegniaceae	Achlya	Achlya oviparvula	0	0	0	0	16	0	0	0	0	0	0	0	0	0	0	0	0	0	0	0	0	0	0	0	0	0	0	0	0	0	0	0	0	0	0	0	0	0	0	0	0	0
ASV359	Fungi	'uncultured fungus'	'uncultured fungus'	'uncultured fungus'	'uncultured fungus'	'uncultured fungus'	uncultured fungus	0	0	0	0	0	0	0	0	0	0	0	0	0	0	0	0	0	0	0	0	0	0	0	0	0	875	44	0	0	0	0	0	0	0	0	0	0	0	0	0	0	0
ASV360			Chrysophyceae	Chromulinales	Chromulinaceae	Spumella	Spumella sp.	0	0	3	0	0	0	0	0	0	0	0	0	0	11	0	0	0	0	0	0	0	63	78	0	0	0	0	0	0	0	0	0	0	0	0	82	0	0	0	0	4	0
ASV361		Bacillariophyta	Bacillariophyceae	Bacillariales	Bacillariaceae	Cylindrotheca	Cylindrotheca closterium	0	0	0	0	0	0	0	0	0	0	0	0	0	35	0	0	0	0	0	12	0	0	0	0	0	95	39	0	79	0	0	0	0	0	0	21	0	14	0	0	0	0
ASV362			Chrysophyceae	Chromulinales	Chromulinaceae	Pedospumella	Pedospumella sp.	0	0	0	0	0	0	0	0	0	0	0	0	0	0	0	0	0	0	0	0	0	0	0	0	0	0	0	0	0	0	0	0	0	0	0	301	34	0	177	0	0	0
ASV363	Stramenopila	Heterokontophyta	Oomycetes	Pythiales	Pythiaceae	Pythium	Pythium attrantheridium	0	0	0	0	0	0	0	0	0	0	0	0	0	0	0	0	0	0	0	0	113	0	0	0	0	0	0	0	0	0	0	0	0	0	0	0	0	0	0	0	0	0
ASV364	Stramenopila	Heterokontophyta	Oomycetes	Leptomitales		Apodachlya	Apodachlya minima	0	0	0	0	0	0	0	0	0	0	0	0	0	0	0	0	0	0	0	0	0	0	0	0	0	0	0	0	0	0	0	0	0	0	0	0	0	0	0	0	0	0
ASV365			Dinophyceae	Prorocentrales	Prorocentraceae	Prorocentrum	Prorocentrum micans	0	0	0	0	0	0	0	0	0	0	0	0	0	0	0	0	0	0	0	0	0	67	333	0	0	0	0	0	0	0	0	0	0	0	0	0	0	0	87	0	0	0
ASV366	Fungi	'uncultured fungus'	'uncultured fungus'	'uncultured fungus'	'uncultured fungus'	'uncultured fungus'	uncultured fungus	0	0	0	0	0	0	0	0	0	0	0	57	0	0	0	0	0	0	0	0	0	0	0	0	0	0	0	0	0	0	0	0	0	0	0	0	0	0	0	0	0	0
ASV367	Stramenopila	Heterokontophyta	Oomycetes	Saprolegniales	Saprolegniaceae	Phragmosporangium	Phragmosporangium uniseriatum	0	0	0	0	0	0	0	0	0	0	0	0	0	260	0	0	0	0	0	0	0	0	0	0	0	0	0	0	0	0	0	0	0	0	0	24	0	0	49	0	0	0
ASV368	Stramenopila	Heterokontophyta	Oomycetes	Pythiales	'uncultured Pythium'	'uncultured Pythium'	uncultured Pythium	0	563	209	0	0	0	0	0	0	0	0	0	0	0	0	0	24	0	0	0	0	0	0	40	0	0	0	0	0	0	0	0	0	0	0	0	0	36	0	0	0	0
ASV369	Stramenopila	Heterokontophyta	Oomycetes	Pythiales	Pythiaceae	Pythium	Pythium sp. unique2	0	0	0	0	0	0	0	0	0	0	0	0	0	0	920	202	69	0	0	0	0	0	0	0	0	0	0	0	0	0	0	0	0	0	0	0	0	0	0	0	0	0
ASV370	Metazoa	Chordata	Actinopteri	Blenniiformes	Gobiesocidae	Gouania	Gouania willdenowi	0	0	0	0	0	0	0	0	0	0	0	0	0	0	0	0	0	31	0	0	0	0	0	0	0	0	0	0	0	0	0	0	0	0	0	0	475	0	0	0	0	0
ASV371	Stramenopila	Heterokontophyta	Oomycetes	Pythiales	Pythiaceae	Pythium	Pythium monospermum	0	0	0	0	0	0	0	0	0	0	0	0	0	0	0	0	0	0	0	0	0	144	0	0	0	0	0	0	0	0	0	0	0	0	0	0	0	0	0	0	0	0
ASV372	Stramenopila	Heterokontophyta	Oomycetes	Pythiales	Pythiogetonaceae	Pythiogeton	Pythiogeton proliferatum	0	0	0	0	0	562	0	0	0	0	0	0	0	0	0	0	0	0	0	0	0	0	0	0	0	0	0	0	0	0	0	0	0	0	0	0	0	0	0	0	0	0
ASV373	Stramenopila	Heterokontophyta	Oomycetes	Pythiales	Pythiaceae	Pythium	Pythium sp. unique2	0	0	0	0	0	0	0	0	0	0	0	0	0	0	0	0	0	0	0	0	0	0	0	0	0	0	0	0	0	0	0	0	0	0	0	0	0	0	0	0	0	0
ASV374	Stramenopila	Heterokontophyta	Oomycetes	Pythiales	Pythiaceae	Pythium	Pythium sp.	0	0	0	0	0	0	0	0	0	0	0	0	0	0	0	0	0	0	0	0	0	0	0	0	0	0	0	0	0	0	0	0	0	0	0	0	0	0	0	0	0	0
ASV375	Stramenopila	Heterokontophyta	Oomycetes	Pythiales	Pythiaceae	Globisporangium	Globisporangium intermedium	1104	0	0	0	66	0	0	0	0	0	0	0	0	0	0	0	0	0	0	0	0	0	0	0	0	0	0	0	0	0	0	0	0	0	0	0	0	0	0	0	0	0
ASV376	Stramenopila	Heterokontophyta	Oomycetes	Albuginales	Albuginaceae	Albugo	Albugo candida	0	0	0	0	0	0	0	0	0	0	0	0	0	0	0	0	0	0	0	0	0	0	0	0	0	0	0	0	0	0	0	0	0	0	0	0	0	0	0	0	0	0
ASV377	Fungi	'uncultured fungus'	'uncultured fungus'	'uncultured fungus'	'uncultured fungus'	'uncultured fungus'	uncultured fungus	0	84	0	0	10	26	0	550	0	0	0	0	0	0	0	0	0	0	0	0	0	0	20	0	0	0	0	0	0	0	0	0	0	0	0	0	0	0	0	0	0	0
ASV378	Stramenopila	Heterokontophyta	Oomycetes	Pythiales	Pythiaceae	Pythium	Pythium sp.	0	0	0	0	0	0	0	0	0	0	0	0	0	0	0	0	0	0	0	0	0	0	0	0	0	0	0	0	0	0	0	0	0	0	0	0	0	0	0	0	0	0
ASV379	Metazoa	Arthropoda	Hexanauplia	Siphonostomatoida	Caligidae	Caligus	Caligus rogercresseyi	0	0	0	0	0	0	0	0	0	0	0	0	0	0	132	330	692	0	0	0	0	0	0	0	0	0	0	0	0	0	0	0	0	0	0	0	0	0	0	0	0	0
ASV380	Stramenopila	Heterokontophyta	Oomycetes	Saprolegniales	Saprolegniaceae	Aphanomyces	Aphanomyces frigidophilus	0	0	0	0	0	0	0	0	0	0	0	0	0	0	57	327	0	0	0	0	0	0	0	0	0	0	0	0	0	0	0	0	0	0	0	0	0	0	0	0	0	0
ASV381	Stramenopila	Heterokontophyta	Oomycetes	Saprolegniales	Saprolegniaceae	Achlya	Achlya flagellata	0	0	0	0	0	0	0	0	0	0	0	0	0	0	0	0	0	0	0	0	0	0	0	0	0	0	0	0	0	0	0	0	0	0	0	0	0	0	0	0	0	0
ASV382	Stramenopila	Heterokontophyta	Oomycetes	Saprolegniales	Saprolegniaceae	Pythiopsis	Pythiopsis cymosa	0	0	0	0	0	0	0	0	0	0	0	0	0	0	0	0	0	0	0	0	0	0	0	0	0	0	0	0	0	0	0	0	0	0	0	0	0	0	0	0	0	0
ASV383	Stramenopila	Heterokontophyta	Oomycetes	Pythiales	Pythiaceae	Pythium	Pythium volutum	0	0	0	0	0	0	0	0	0	0	0	0	0	0	0	0	0	0	0	0	0	0	0	0	0	0	0	0	0	0	0	0	0	0	0	0	0	0	0	0	0	0
ASV384	Stramenopila	Heterokontophyta	Oomycetes	Pythiales	Pythiogetonaceae	Pythiogeton	Pythiogeton zizaniae	0	0	0	0	0	0	0	0	0	1110	0	0	0	0	0	0	0	0	0	0	0	0	0	0	0	0	0	0	0	0	0	0	0	0	0	0	0	0	0	0	0	0
ASV385	Stramenopila	Heterokontophyta	Oomycetes	Pythiales	Pythiaceae	Phytopythium	Phytopythium citrinum	0	0	0	0	0	0	0	0	0	0	0	0	0	0	0	0	0	0	0	0	0	0	0	0	0	0	0	0	0	0	0	0	0	0	0	0	0	0	0	0	0	0
ASV386	Stramenopila	Heterokontophyta	Oomycetes				Oomycetes sp. NF-4	0	0	0	0	0	0	0	0	0	0	0	0	0	0	0	0	0	0	286	0	0	0	0	0	0	0	0	0	0	0	0	0	0	0	0	0	0	0	0	0	0	0
ASV387			Chrysophyceae	Chromulinales	Chromulinaceae	Spumella	Spumella rivalis	0	0	143	0	0	0	0	0	0	0	0	0	0	0	0	0	0	0	0	0	0	0	0	0	0	0	0	0	0	0	0	0	0	0	0	0	0	0	0	0	0	0
ASV388	Stramenopila	Heterokontophyta	Oomycetes			Haptoglossa	Haptoglossa zoospora	0	0	168	218	0	0	0	0	0	0	0	0	0	0	29	0	0	0	0	0	0	0	0	0	0	0	0	0	0	0	0	0	0	0	0	0	0	0	0	0	0	0
ASV389	Stramenopila	Heterokontophyta	Oomycetes	Pythiales	Pythiaceae	Phytopythium	Phytopythium citrinum	161	0	0	0	0	0	0	0	0	0	0	0	0	0	0	0	0	0	0	0	0	0	0	0	0	0	0	0	0	0	0	0	0	0	0	0	0	0	0	0	0	0
ASV390	Stramenopila	Heterokontophyta	Oomycetes	Pythiales	Pythiaceae	Globisporangium	Globisporangium intermedium	0	0	0	0	0	0	0	0	0	0	0	0	0	0	0	0	0	0	0	0	0	0	0	0	0	0	0	0	0	0	0	0	0	0	0	0	0	0	0	0	0	0
ASV391			Chrysophyceae	Chromulinales	Chromulinaceae	Pedospumella	Pedospumella sp. JBM19	0	0	0	0	0	0	0	0	0	0	0	0	0	0	0	0	0	0	0	0	0	0	0	0	0	0	0	0	0	0	0	0	0	0	0	0	0	0	0	0	0	0
ASV392	Stramenopila	Heterokontophyta	Oomycetes	Leptomitales	'uncultured Apodachlya'	'uncultured Apodachlya'	uncultured Apodachlya	0	0	0	0	0	0	0	0	0	0	0	0	0	0	48	5	0	0	0	0	0	0	0	0	0	0	0	0	0	0	0	0	0	0	0	0	0	0	0	0	0	0
ASV393	Fungi	'uncultured fungus'	'uncultured fungus'	'uncultured fungus'	'uncultured fungus'	'uncultured fungus'	uncultured fungus	0	0	0	0	0	0	0	0	0	0	101	0	0	59	0	0	0	0	0	0	0	0	0	0	0	0	0	0	0	0	0	11	0	4	17	0	0	0	0	233	13	0
ASV394	Stramenopila	Heterokontophyta	Oomycetes	Pythiales	Pythiaceae	Pythium	Pythium aff. torulosum	0	0	0	0	0	0	0	0	0	0	0	0	0	0	0	0	0	0	0	0	0	0	0	0	0	0	0	704	359	0	0	0	0	0	0	0	0	0	0	0	0	0
ASV395			Chrysophyceae	Chromulinales	Chromulinaceae	'Spumella-like'	Spumella-like flagellate Got220	0	0	0	0	0	0	0	0	0	0	0	0	0	0	0	0	0	0	0	1060	0	0	0	0	0	0	0	0	0	0	0	0	0	0	0	0	0	0	0	0	0	0
ASV396		Bacillariophyta	Bacillariophyceae	Surirellales	Surirellaceae	Surirella	Surirella sp. CCAP 1071/2	0	0	0	0	0	0	0	0	1059	0	0	0	0	0	0	0	0	0	0	0	0	0	0	0	0	0	0	0	0	0	0	0	0	0	0	0	0	0	0	0	0	0
ASV397	Stramenopila	Heterokontophyta	Oomycetes	Peronosporales	Peronosporaceae	Hyaloperonospora	Hyaloperonospora cochleariae	0	0	0	0	0	0	0	0	0	0	0	0	12	78	0	0	0	0	0	0	0	0	0	0	0	69	0	0	0	0	0	0	0	0	0	0	0	0	0	0	0	0
ASV398	Stramenopila	Heterokontophyta	Oomycetes	Pythiales	Pythiaceae	Phytopythium	Phytopythium citrinum	0	0	256	785	0	0	0	0	0	0	0	0	0	0	10	0	0	0	0	0	0	0	0	0	0	0	0	0	0	0	0	0	0	0	0	0	0	0	0	0	0	0
ASV399	Stramenopila	Heterokontophyta	Oomycetes	Peronosporales	Peronosporaceae	Hyaloperonospora	Hyaloperonospora barbareae	0	0	7	0	0	0	0	0	0	0	0	0	0	0	0	0	0	0	0	0	0	0	0	0	0	0	0	0	0	0	0	0	0	0	0	0	183	0	0	0	0	0
ASV400			Chrysophyceae	Chromulinales	Chromulinaceae	Pedospumella	Pedospumella sp. JBM19	0	0	0	0	0	0	0	0	0	0	0	0	0	0	0	0	0	0	0	0	0	0	0	0	0	202	843	0	0	0	0	0	0	0	0	0	0	0	0	0	0	0
ASV401	Stramenopila	Heterokontophyta	Oomycetes	Myzocytiopsidales	Myzocytiopsidaceae	Myzocytiopsis	Myzocytiopsis sp. venatrix	0	0	0	47	0	0	0	0	0	0	0	0	0	182	0	0	0	0	0	0	0	0	0	0	0	0	0	0	0	0	0	0	0	0	0	0	0	0	0	0	0	0
ASV402			Chrysophyceae			'Spumella-like'	Spumella-like flagellate JBC/S24	0	0	0	0	0	0	0	124	170	0	0	0	56	0	0	0	0	0	17	0	31	0	228	0	0	0	0	0	0	0	0	49	168	0	0	0	27	19	38	0	0	0
ASV403	Metazoa	Mollusca	Gastropoda	Architaenioglossa	Ampullariidae	Pomacea	Pomacea canaliculata	13	0	0	0	7	0	0	0	0	0	123	82	0	0	0	0	0	0	0	0	0	0	0	0	18	107	0	6	49	69	6	0	71	0	0	0	0	0	0	0	0	0
ASV404	Fungi	'uncultured fungus'	'uncultured fungus'	'uncultured fungus'	'uncultured fungus'	'uncultured fungus'	uncultured fungus	0	0	0	58	0	0	0	0	0	0	0	0	0	0	0	0	0	144	0	0	0	0	0	0	0	481	252	0	0	0	0	0	0	0	0	0	0	0	0	0	0	0
ASV405	Stramenopila	Heterokontophyta	Oomycetes	Pythiales	Pythiaceae	Globisporangium	Globisporangium intermedium	0	0	0	0	0	0	0	0	0	0	0	0	0	0	0	0	0	0	0	0	0	0	0	133	36	0	0	0	0	0	0	0	0	0	0	0	0	0	0	0	0	0
ASV406	Stramenopila	Heterokontophyta	Oomycetes	Leptomitales		Apodachlya	Apodachlya minima	73	0	0	0	26	0	0	135	0	689	0	0	0	0	0	0	0	0	0	0	0	0	0	20	0	0	0	0	0	0	0	0	0	0	0	0	0	0	0	0	0	0
ASV407			Chrysophyceae	Chromulinales	Chromulinaceae	'Spumella-like'	Spumella-like flagellate Got220	0	0	0	0	0	0	0	0	0	0	0	0	0	0	0	0	0	0	0	0	0	0	0	0	0	0	0	0	0	0	0	0	0	0	0	0	0	0	0	0	0	0
ASV408	Stramenopila	Heterokontophyta	Oomycetes			Haptoglossa	Haptoglossa zoospora	0	0	0	0	0	0	0	0	0	0	0	0	0	0	195	224	4	0	0	0	0	0	0	0	0	0	0	0	0	0	0	0	0	0	0	110	0	0	0	0	0	0
ASV409			Chrysophyceae			'Spumella-like'	Spumella-like flagellate JBC/S24	0	0	0	0	0	0	0	0	125	0	0	0	0	0	0	0	0	0	0	0	0	0	0	0	0	0	0	0	0	0	0	0	0	0	0	0	0	0	0	0	0	0
ASV410		Bacillariophyta	Bacillariophyceae	Surirellales	Surirellaceae	Surirella	Surirella sp. CCAP 1071/2	0	0	0	0	0	0	0	0	0	0	0	0	0	0	0	0	0	0	0	0	0	0	0	0	0	0	0	0	0	0	0	0	0	0	0	0	0	0	0	0	0	0
ASV411	Stramenopila	Heterokontophyta	Oomycetes	Pythiales	Pythiaceae	Pythium	Pythium helicandrum	0	0	0	0	0	0	0	0	0	0	0	0	0	0	0	0	0	0	0	0	0	0	0	0	0	0	0	0	0	0	0	0	0	0	0	0	0	0	0	0	0	0
ASV412	Stramenopila	Heterokontophyta	Oomycetes	Pythiales	Pythiaceae	Pythium	Pythium irregulare	0	0	0	0	0	0	0	0	0	0	0	0	66	67	0	0	0	0	0	0	88	0	0	0	0	0	0	0	0	0	0	0	0	70	0	0	0	0	0	0	19	103
ASV413			Chrysophyceae	Chromulinales	Chromulinaceae	Pedospumella	Pedospumella encystans	0	0	0	5	0	0	0	0	0	0	0	0	0	0	0	0	23	0	0	0	0	0	0	0	0	0	0	0	0	0	0	0	0	0	0	0	0	52	0	0	0	0
ASV414	Metazoa	Chordata	Mammalia	Artiodactyla	Bovidae	Bos	Bos mutus	0	0	0	0	0	0	0	0	0	0	0	0	0	0	0	0	0	0	0	0	0	0	0	0	0	0	26	0	0	0	0	0	0	0	0	375	413	0	0	0	0	0
ASV415			Chrysophyceae	Chromulinales	Chromulinaceae	'Spumella-like'	Spumella-like flagellate Got220	0	0	4	0	0	0	0	0	0	0	0	0	0	0	0	0	0	0	0	0	0	0	0	0	0	0	0	0	0	0	0	0	0	0	0	0	0	0	0	0	0	0
ASV416	Stramenopila	Heterokontophyta	Oomycetes	Pythiales	Pythiaceae	Pythium	Pythium irregulare	0	0	0	0	0	0	0	0	0	0	0	0	0	0	0	0	0	0	0	0	0	0	0	0	0	0	0	0	0	0	0	0	0	0	0	0	0	0	0	0	0	315
ASV417	Metazoa	Arthropoda	Hexanauplia	Siphonostomatoida	Caligidae	Caligus	Caligus rogercresseyi	0	0	0	0	0	0	0	0	0	0	0	0	0	0	0	0	0	0	0	0	0	0	0	0	0	0	0	0	0	0	0	0	0	0	0	0	0	0	0	0	0	0
ASV418			Chrysophyceae	Chromulinales	Chromulinaceae	Pedospumella	Pedospumella sp.	0	0	0	0	0	0	0	0	0	0	0	0	0	0	0	0	0	0	0	0	0	0	0	0	0	0	0	0	0	0	0	0	0	0	0	0	0	0	0	57	0	65
ASV419	Stramenopila	Heterokontophyta	Oomycetes	Saprolegniales	Saprolegniaceae	Aphanomyces	Aphanomyces cladogamus	0	0	0	0	0	0	0	152	0	0	0	0	0	0	0	0	0	0	0	0	0	0	71	0	0	0	0	18	186	0	0	0	0	0	0	0	0	0	0	145	362	0
ASV421							eukaryotic synthetic construct	0	0	0	0	0	0	0	0	0	0	0	0	0	0	0	0	0	0	0	0	0	0	0	0	0	0	0	0	0	0	0	0	0	0	0	0	0	0	0	0	0	0
ASV422	Stramenopila	Heterokontophyta	Oomycetes	Saprolegniales	Saprolegniaceae	Saprolegnia	Saprolegnia anisospora	0	0	0	0	0	0	0	0	0	0	0	0	0	0	0	0	0	0	0	0	0	0	0	0	0	0	0	0	0	0	0	0	0	0	0	0	0	0	0	0	0	0
ASV423	Fungi	'uncultured fungus'	'uncultured fungus'	'uncultured fungus'	'uncultured fungus'	'uncultured fungus'	uncultured fungus	0	0	0	0	0	0	0	0	0	0	0	0	0	0	0	0	0	0	0	0	0	0	0	0	0	0	0	0	0	0	0	0	0	0	0	0	0	0	0	0	0	0
ASV424	Stramenopila	Heterokontophyta	Oomycetes	Pythiales	Pythiaceae	Pythium	Pythium polymastum	182	0	0	0	0	0	0	0	0	0	0	0	0	0	0	0	0	0	0	0	0	0	0	0	0	0	0	0	0	0	0	0	779	0	0	0	0	0	0	0	0	0
ASV425	Stramenopila	Heterokontophyta	Oomycetes	Albuginales	Albuginaceae	Albugo	Albugo sp. 28A	0	0	0	0	163	0	0	0	0	0	0	0	0	0	0	0	0	0	0	0	0	0	0	160	0	0	0	0	0	0	0	0	0	0	0	0	0	0	0	0	0	0
ASV426	Stramenopila	Heterokontophyta	Oomycetes	Saprolegniales	Saprolegniaceae	Aphanomyces	Aphanomyces stellatus	0	0	0	0	0	0	0	0	0	0	0	0	0	0	0	0	0	0	0	0	0	0	0	0	0	0	0	0	0	0	0	0	0	0	0	0	0	0	0	0	0	0
ASV427	Stramenopila	Heterokontophyta	Oomycetes	Leptomitales	'uncultured Apodachlya'	'uncultured Apodachlya'	uncultured Apodachlya	0	0	0	0	0	0	0	0	0	0	0	0	290	250	0	0	0	0	0	0	0	0	0	0	0	0	0	0	0	0	0	0	0	0	0	0	0	0	0	0	0	0
ASV428	Stramenopila	Heterokontophyta	Oomycetes	Peronosporales	Peronosporaceae	Phytophthora	Phytophthora richardiae	0	0	0	0	0	0	0	0	0	0	0	0	0	0	0	0	0	0	0	0	0	0	0	0	0	0	0	0	0	0	0	0	0	0	0	0	0	0	0	0	0	0
ASV429	Stramenopila	Heterokontophyta	Oomycetes	Pythiales	Pythiaceae	Pythium	Pythium apiculatum	0	0	0	0	0	0	0	0	0	0	0	0	0	0	0	0	0	0	0	0	67	0	0	0	0	0	0	0	0	0	0	0	0	0	0	0	0	0	0	0	0	0
ASV430	Stramenopila	Heterokontophyta	Oomycetes	Pythiales	Pythiogetonaceae	Pythiogeton	Pythiogeton zizaniae	0	0	0	0	0	0	0	0	0	0	0	0	0	0	0	0	0	0	0	0	0	0	0	0	0	0	0	0	0	0	0	0	0	0	0	0	0	0	0	0	0	0
ASV431	Stramenopila	Heterokontophyta	Oomycetes	Pythiales	Pythiaceae	Pythium	Pythium sylvaticum	0	0	0	0	22	35	0	0	0	0	0	0	0	0	0	0	0	0	0	0	27	0	0	35	0	0	0	0	0	0	0	0	0	0	0	0	0	0	0	0	0	0
ASV432	Stramenopila	Heterokontophyta	Oomycetes	Peronosporales	Peronosporaceae	Hyaloperonospora	Hyaloperonospora praecox	0	0	0	0	58	0	0	0	0	0	0	0	0	0	0	0	0	0	0	0	0	0	0	0	0	0	0	0	0	0	0	0	0	0	0	0	0	0	0	0	0	0
ASV433	Stramenopila	Heterokontophyta	Oomycetes	Myzocytiopsidales	Myzocytiopsidaceae	Myzocytiopsis	Myzocytiopsis osiris	0	0	0	0	0	0	0	0	0	0	0	81	0	270	0	0	0	5	0	0	0	0	0	0	0	0	173	0	0	0	0	0	54	0	0	0	0	0	0	0	0	0
ASV434			Chrysophyceae	Chromulinales	Chromulinaceae	'Spumella-like'	Spumella-like flagellate 1006	0	0	0	0	0	0	0	0	0	0	0	0	117	426	0	0	0	0	0	0	0	0	0	0	0	0	0	0	0	0	0	0	0	0	0	0	0	0	0	0	0	0
ASV435	Stramenopila	Heterokontophyta	Oomycetes	Saprolegniales	Saprolegniaceae	Phragmosporangium	Phragmosporangium uniseriatum	165	85	0	0	0	0	0	0	0	0	0	0	0	0	0	0	0	0	0	0	0	0	0	0	0	0	0	0	0	0	0	0	0	168	0	0	0	0	243	0	100	0
ASV436	Stramenopila	Heterokontophyta	Oomycetes			Haptoglossa	Haptoglossa sp. SL20	0	0	0	0	0	0	0	0	0	0	0	0	0	0	0	0	0	0	0	0	0	0	0	0	0	0	0	0	0	0	0	0	0	0	0	0	0	0	0	0	0	0
ASV437	Stramenopila	Heterokontophyta	Oomycetes	Pythiales	Pythiaceae	Pythium	Pythium sp.	0	0	0	0	0	0	0	0	0	0	0	0	0	0	0	0	0	0	0	0	0	0	918	0	0	0	0	0	0	0	0	0	0	0	0	0	0	0	0	0	0	0
ASV438			Chrysophyceae	Chromulinales	Chromulinaceae	Spumella	Spumella sp.	0	0	0	0	0	0	0	0	0	0	0	0	0	0	0	0	32	0	0	0	0	103	0	0	0	0	0	0	0	0	0	0	0	0	0	0	0	0	0	0	0	0
ASV439	Stramenopila	Heterokontophyta	Oomycetes	Leptomitales		Apodachlya	Apodachlya minima	0	0	0	0	0	0	0	0	0	0	0	0	0	0	0	0	0	0	0	0	0	0	0	0	0	0	0	0	0	0	0	0	0	0	0	0	0	0	0	0	0	0
ASV440	Stramenopila	Heterokontophyta	Oomycetes	Pythiales	Pythiaceae	Globisporangium	Globisporangium intermedium	0	0	0	0	0	0	0	909	0	0	0	0	0	0	0	0	0	0	0	0	0	0	0	0	0	0	0	0	0	0	0	0	0	0	0	0	0	0	0	0	0	0
ASV441			Chrysophyceae	Chromulinales	Chromulinaceae	Pedospumella	Pedospumella sp. JBM19	0	0	0	0	0	0	0	0	0	0	0	0	0	0	0	0	0	0	0	0	0	0	0	0	0	0	0	0	0	0	0	0	0	0	0	0	0	0	0	0	0	0
ASV442	Stramenopila	Heterokontophyta	Oomycetes	Pythiales	Pythiaceae	Pythium	Pythium polymastum	0	0	0	0	0	0	37	339	65	80	0	0	0	0	0	0	0	0	0	0	0	0	0	0	0	51	54	0	0	0	0	66	0	0	0	0	0	0	0	0	0	0
ASV443			Chrysophyceae	Chromulinales	Chromulinaceae	'Spumella-like'	Spumella-like flagellate 1006	0	0	0	0	0	0	0	0	0	62	0	0	0	0	0	0	0	0	0	0	0	0	0	0	0	0	0	0	0	0	0	0	0	0	47	0	0	0	78	0	0	0
ASV444	Fungi	'uncultured fungus'	'uncultured fungus'	'uncultured fungus'	'uncultured fungus'	'uncultured fungus'	uncultured fungus	0	0	0	0	0	0	0	0	0	0	0	0	0	0	0	0	0	0	0	0	0	0	0	0	0	0	0	0	0	0	0	0	0	0	0	0	0	0	0	0	0	0
ASV446	Stramenopila	Heterokontophyta	Oomycetes	Pythiales	Pythiaceae	Pythium	Pythium sp. unique2	0	0	0	0	0	0	0	0	0	0	0	0	0	0	0	0	0	0	0	0	0	0	0	0	0	0	268	0	0	0	0	0	330	0	0	0	0	0	0	0	0	0
ASV447	Stramenopila	Heterokontophyta	Oomycetes	Pythiales	Pythiaceae	Pythium	Pythium sp. B65	0	107	0	0	0	0	0	0	0	0	0	0	0	0	0	0	147	0	0	0	0	0	0	88	44	0	0	0	0	0	0	0	152	0	0	0	0	0	0	0	0	104
ASV448			Dinophyceae	Prorocentrales	Prorocentraceae	Prorocentrum	Prorocentrum micans	0	0	0	0	0	0	0	0	0	0	0	0	0	0	74	6	0	0	0	0	0	0	0	0	0	0	0	0	0	0	0	0	0	0	0	0	0	0	0	0	0	0
ASV449	Fungi	'uncultured fungus'	'uncultured fungus'	'uncultured fungus'	'uncultured fungus'	'uncultured fungus'	uncultured fungus	0	0	0	0	0	0	0	0	0	0	0	0	0	0	0	0	0	0	0	0	0	0	0	0	0	0	0	140	0	0	0	0	0	0	0	0	0	0	0	0	0	0
ASV450			Chrysophyceae	Chromulinales	Chromulinaceae	'Spumella-like'	Spumella-like flagellate 194f	0	0	0	0	0	0	0	0	0	0	0	18	0	0	0	0	0	0	0	0	0	0	0	0	0	0	0	0	72	0	0	0	0	0	0	0	49	158	37	0	0	0
ASV451	Stramenopila	Heterokontophyta	Oomycetes	Pythiales	Pythiaceae	Pythium	Pythium sylvaticum	0	0	0	0	0	0	0	0	0	0	0	0	0	0	0	0	0	0	0	0	0	0	0	0	0	0	0	0	0	0	0	0	0	0	0	0	0	0	0	0	0	0
ASV453			Chrysophyceae	Chromulinales	Chromulinaceae	Pedospumella	Pedospumella encystans	0	0	17	0	0	0	0	0	0	0	0	0	0	0	0	0	0	0	0	0	0	18	0	0	0	0	0	0	0	0	0	0	0	0	0	0	0	0	0	0	0	0
ASV454	Stramenopila	Heterokontophyta	Oomycetes	Pythiales	Pythiaceae	Pythium	Pythium polymastum	0	0	0	0	0	0	0	0	0	0	0	0	0	0	0	0	0	0	0	0	0	0	0	0	0	0	0	0	0	0	0	0	0	0	0	0	0	0	0	844	0	0
ASV455	Stramenopila	Heterokontophyta	Oomycetes	Peronosporales	Peronosporaceae	Hyaloperonospora	Hyaloperonospora cochleariae	0	0	0	0	0	6	0	0	0	0	0	0	29	140	0	0	0	0	0	0	0	0	0	0	9	0	0	0	0	0	0	0	0	0	0	0	0	0	0	0	0	0
ASV456			Chrysophyceae			'Spumella-like'	Spumella-like flagellate JBC/S24	0	32	0	0	0	0	0	34	0	256	0	0	48	38	0	0	0	0	0	0	0	0	0	0	0	0	0	0	0	0	0	0	0	0	60	0	0	0	0	37	0	0
ASV457			Chrysophyceae	Chromulinales	Chromulinaceae	Pedospumella	Pedospumella encystans	0	0	0	0	0	11	0	0	0	153	0	0	8	50	0	0	0	0	0	0	0	0	0	0	0	0	0	0	0	0	0	0	0	0	0	0	0	0	0	88	13	0
ASV458			Chrysophyceae	Chromulinales	Chromulinaceae	'Spumella-like'	Spumella-like flagellate 1006	36	32	16	0	96	120	26	0	0	0	0	0	0	0	0	10	0	0	0	0	0	0	0	0	43	0	0	0	0	0	0	0	157	0	0	105	0	0	0	0	0	0
ASV459	Stramenopila	Heterokontophyta	Oomycetes	Pythiales	Pythiaceae	Pythium	Pythium oligandrum	0	0	0	0	0	0	0	0	0	0	0	0	0	0	0	0	0	0	0	0	0	0	0	0	0	0	0	0	0	0	0	0	0	0	0	0	0	0	0	0	0	0
ASV460	Fungi	'uncultured fungus'	'uncultured fungus'	'uncultured fungus'	'uncultured fungus'	'uncultured fungus'	uncultured fungus	0	0	0	0	0	0	0	0	0	0	0	0	2	81	0	0	0	0	0	0	0	0	0	0	0	328	0	0	0	0	0	19	20	8	0	0	6	39	0	25	0	50
ASV461	Stramenopila	Heterokontophyta	Oomycetes	Saprolegniales	Saprolegniaceae	Aphanomyces	Aphanomyces sp. APH3	0	0	0	0	0	0	0	0	0	0	0	0	0	0	0	0	0	0	0	0	0	0	0	0	0	0	0	0	0	0	0	156	0	0	0	0	0	0	0	0	0	0
ASV462	Fungi	'uncultured fungus'	'uncultured fungus'	'uncultured fungus'	'uncultured fungus'	'uncultured fungus'	uncultured fungus	0	0	11	0	0	0	0	0	0	0	0	0	0	0	0	0	0	0	0	0	0	0	0	0	0	0	0	0	0	0	0	0	0	0	0	103	0	0	13	0	0	0
ASV463	Stramenopila	Heterokontophyta	Oomycetes	Pythiales	Pythiaceae	Pythium	Pythium chondricola	0	0	0	0	0	0	60	0	0	0	0	0	0	0	0	0	0	0	0	0	0	0	0	63	0	0	0	0	501	0	0	0	0	0	0	0	0	0	0	0	0	0
ASV464	Stramenopila	Heterokontophyta	Oomycetes	Pythiales	Pythiaceae	Pythium	Pythium polymastum	0	0	0	0	0	0	0	0	0	0	0	0	0	0	0	0	0	0	0	0	0	0	0	0	0	0	0	0	0	0	0	0	0	0	0	0	0	0	0	0	0	0
ASV465	Stramenopila	Heterokontophyta	Oomycetes	Pythiales	Pythiaceae	Pythium	Pythium sp. CAL-2011f	320	0	0	0	0	21	0	0	0	0	0	0	0	0	0	0	0	0	0	0	0	0	291	0	0	0	0	0	0	0	0	0	0	0	0	0	0	0	0	0	0	0
ASV466			Chrysophyceae	Chromulinales	Chromulinaceae	'Spumella-like'	Spumella-like flagellate Got220	0	0	723	0	0	0	0	0	0	0	0	0	0	0	58	0	0	0	0	0	0	0	0	0	0	0	0	0	0	0	0	0	0	0	0	17	0	0	0	0	0	0
ASV467	Stramenopila	Heterokontophyta	Oomycetes	Pythiales	Pythiaceae	Pythium	Pythium anandrum	0	0	0	0	0	0	0	37	87	36	28	0	0	18	0	0	0	0	0	0	0	0	0	0	0	0	0	0	0	0	0	0	0	0	0	0	0	0	0	84	0	0
ASV468		Bacillariophyta	Bacillariophyceae	Naviculales	Naviculaceae	Navicula	Navicula trivialis	0	0	0	0	0	0	0	0	648	155	0	0	0	0	0	0	0	0	0	0	0	0	0	0	0	0	0	0	0	0	0	0	0	0	0	0	0	0	0	0	0	0
ASV469	Stramenopila	Heterokontophyta	Oomycetes	Pythiales	Pythiaceae	Pythium	Pythium sp. C73	0	0	0	0	0	0	0	0	0	0	0	0	0	0	0	0	0	0	0	0	0	0	0	0	0	0	0	0	0	0	0	0	0	0	0	0	0	0	0	0	0	0
ASV470			Chrysophyceae	Chromulinales	Chromulinaceae	Spumella	Spumella lacusvadosi	0	0	0	0	0	0	0	0	0	0	81	0	0	0	0	0	0	0	0	0	0	0	0	0	0	0	0	0	0	0	0	0	0	11	0	53	0	0	0	0	8	0
ASV471	Stramenopila	Heterokontophyta	Oomycetes	Leptomitales		Apodachlya	Apodachlya brachynema	0	0	0	0	0	28	0	0	0	0	0	0	0	0	0	0	0	0	0	0	0	0	0	0	0	0	0	0	0	0	0	282	232	0	0	0	0	0	0	0	0	0
ASV472			Dinophyceae	Prorocentrales	Prorocentraceae	Prorocentrum	Prorocentrum micans	0	0	0	0	0	0	0	0	0	0	771	27	0	0	0	0	0	0	0	0	0	0	0	0	0	0	0	0	0	0	0	0	0	0	0	0	0	0	0	0	0	0
ASV473	Stramenopila	Heterokontophyta	Oomycetes	Pythiales	Pythiaceae	Pythium	Pythium tracheiphilum	0	0	0	0	0	0	0	0	0	0	0	0	0	0	0	0	0	0	0	0	0	0	0	0	0	0	0	0	0	0	0	0	0	0	0	0	0	0	0	0	0	0
ASV474	Stramenopila	Heterokontophyta	Oomycetes	Leptomitales		Apodachlya	Apodachlya minima	0	0	0	0	0	0	0	0	0	0	0	0	0	0	0	0	0	0	0	0	233	0	0	0	0	0	0	0	0	0	0	0	0	0	0	0	0	0	0	0	0	0
ASV475	Stramenopila	Heterokontophyta	Oomycetes	Pythiales	Pythiaceae	Pythium	Pythium heterothallicum	0	0	0	0	0	0	0	0	0	144	0	0	0	0	0	0	0	0	0	0	0	0	0	0	0	0	0	0	0	0	0	0	0	0	0	0	0	0	0	0	0	0
ASV476	Stramenopila	Heterokontophyta	Oomycetes	Peronosporales	Peronosporaceae	Phytophthora	Phytophthora syringae	0	95	0	0	207	0	0	0	0	0	0	0	0	0	0	0	0	0	0	0	0	0	0	0	0	0	0	0	0	0	0	0	0	0	0	0	0	0	0	0	87	0
ASV477	Fungi	'uncultured fungus'	'uncultured fungus'	'uncultured fungus'	'uncultured fungus'	'uncultured fungus'	uncultured fungus	0	5	0	0	0	0	0	0	0	0	0	0	0	0	0	0	0	0	0	0	0	0	0	0	0	0	0	0	0	0	0	0	0	0	0	339	41	0	0	0	0	0
ASV478	Fungi	'uncultured fungus'	'uncultured fungus'	'uncultured fungus'	'uncultured fungus'	'uncultured fungus'	uncultured fungus	0	236	0	0	16	0	0	0	0	111	0	0	0	0	0	0	0	0	0	0	0	0	0	0	0	0	0	0	0	0	0	0	0	0	0	0	0	0	0	0	0	0
ASV479	Stramenopila	Heterokontophyta	Oomycetes	Pythiales	Pythiaceae	Pythium	Pythium sp.	0	0	0	0	0	0	788	0	0	0	0	0	0	0	0	0	0	0	0	0	0	0	0	0	0	0	0	0	0	0	0	0	0	0	0	0	0	0	0	0	0	0
ASV480	Fungi	'uncultured fungus'	'uncultured fungus'	'uncultured fungus'	'uncultured fungus'	'uncultured fungus'	uncultured fungus	0	0	0	0	0	0	0	0	0	0	0	0	0	0	0	0	0	0	0	0	0	0	0	0	0	0	0	0	0	0	0	0	0	0	0	0	0	62	209	0	0	0
ASV481		Bacteroidetes	Flavobacteriia	Flavobacteriales	Blattabacteriaceae	Blattabacterium	Blattabacterium punctulatus	0	0	0	0	0	0	0	0	0	0	347	32	0	0	0	0	0	0	0	0	0	0	0	0	0	0	0	0	0	0	0	0	0	0	0	0	0	76	0	0	0	0
ASV482			Chrysophyceae	Chromulinales	Chromulinaceae	'Spumella-like'	Spumella-like flagellate Got220	0	0	0	0	0	0	0	0	0	0	0	0	0	780	0	0	0	0	0	0	0	0	0	0	0	0	0	0	0	0	0	0	0	0	0	0	0	0	0	0	0	0
ASV483	Stramenopila	Heterokontophyta	Oomycetes	Albuginales	Albuginaceae	Wilsoniana	Wilsoniana amaranthi	0	0	0	0	0	0	0	0	0	0	0	0	0	0	0	0	0	0	0	0	0	0	0	0	0	0	0	0	0	0	0	0	0	0	0	0	0	0	0	0	0	0
ASV484	Stramenopila	Heterokontophyta	Oomycetes	Pythiales	Pythiaceae	Pythium	Pythium aff. monospermum	0	0	0	0	0	0	0	0	0	0	0	0	0	0	0	0	0	0	0	0	0	0	0	0	0	0	0	0	0	0	0	0	0	0	0	0	0	0	553	0	0	0
ASV485			Chrysophyceae	Chromulinales	Chromulinaceae	Pedospumella	Pedospumella encystans	0	0	0	0	0	0	0	0	0	55	0	0	0	0	0	0	0	0	0	0	20	0	0	16	140	0	0	0	0	0	0	0	0	0	0	0	0	0	0	0	0	0
ASV486	Stramenopila	Heterokontophyta	Oomycetes	Pythiales	Pythiaceae	Pythium	Pythium rostratum	0	0	0	0	0	68	0	0	238	0	0	0	0	0	0	0	0	0	0	0	0	0	0	0	0	0	0	0	0	0	0	0	0	0	0	0	0	0	0	0	0	0
ASV487		Bacillariophyta	Bacillariophyceae	Naviculales	Naviculaceae	Navicula	Navicula trivialis	0	45	0	0	0	0	0	0	634	90	0	0	0	0	0	0	0	0	0	0	0	0	0	0	0	0	0	0	0	0	0	0	0	0	0	0	0	0	0	0	0	0
ASV488			Chrysophyceae	Chromulinales	Chromulinaceae	Spumella	Spumella sp.	0	0	0	0	0	0	0	0	0	0	0	0	0	611	0	0	0	0	0	0	0	0	0	0	0	0	33	0	0	0	0	0	31	0	0	0	0	0	0	0	0	0
ASV489	Stramenopila	Heterokontophyta	Oomycetes	Saprolegniales	Saprolegniaceae	Pythiopsis	Pythiopsis humphreyana	0	0	0	0	0	0	0	0	0	0	0	0	0	0	0	0	0	0	0	0	0	0	0	0	0	0	0	173	588	0	0	0	0	0	0	0	0	0	0	0	0	0
ASV490	Stramenopila	Heterokontophyta	Oomycetes	Pythiales	Pythiaceae	Pythium	Pythium macrosporum	0	0	0	410	0	0	0	0	0	0	0	0	0	0	0	0	0	109	0	0	0	0	0	0	0	0	0	0	0	0	0	0	0	0	0	0	0	0	0	0	0	0
ASV491	Fungi	'uncultured fungus'	'uncultured fungus'	'uncultured fungus'	'uncultured fungus'	'uncultured fungus'	uncultured fungus	0	0	0	0	0	0	0	0	0	0	0	0	0	0	0	0	0	0	0	0	0	0	0	0	0	0	0	0	0	0	0	0	0	0	0	0	0	0	0	0	0	0
ASV492			Chrysophyceae			'Spumella-like'	Spumella-like flagellate JBC/S24	0	0	0	0	0	0	0	0	0	0	0	0	0	0	0	0	0	0	0	0	0	0	0	6	0	0	0	0	0	0	0	0	0	0	0	0	0	33	0	0	0	0
ASV493			Chrysophyceae			'Spumella-like'	Spumella-like flagellate JBC/S24	0	0	528	40	0	0	0	0	0	0	0	0	0	0	0	0	0	0	0	0	0	0	0	0	0	0	0	0	0	0	0	0	0	0	0	0	0	0	0	0	0	0
ASV494			Chrysophyceae	Chromulinales	Chromulinaceae	Pedospumella	Pedospumella sp. JBM19	0	0	0	0	0	0	0	0	0	0	0	0	0	0	0	0	0	0	0	0	0	0	0	0	0	0	0	0	0	0	0	0	0	0	0	147	466	0	0	0	0	0
ASV495		Bacillariophyta	Bacillariophyceae	Naviculales	Naviculaceae	Navicula	Navicula sp. ETS 07	0	0	0	0	0	0	0	0	0	0	0	0	0	0	0	0	0	0	0	0	0	0	0	0	0	0	0	0	0	0	0	0	0	0	0	5	0	0	0	0	0	0
ASV496	Fungi	'uncultured fungus'	'uncultured fungus'	'uncultured fungus'	'uncultured fungus'	'uncultured fungus'	uncultured fungus	0	0	0	29	0	0	0	0	0	0	0	0	0	0	0	0	0	0	0	0	99	0	0	0	0	0	0	0	0	0	0	0	0	0	0	0	0	0	0	0	0	0
ASV497	Fungi	'uncultured fungus'	'uncultured fungus'	'uncultured fungus'	'uncultured fungus'	'uncultured fungus'	uncultured fungus	0	0	34	0	0	0	0	0	0	0	0	0	0	0	0	0	0	0	0	0	0	0	0	0	0	0	0	0	0	0	0	0	0	0	0	0	0	0	0	0	0	0
ASV498			Chrysophyceae	Chromulinales	Chromulinaceae	'Spumella-like'	Spumella-like flagellate 194f	0	0	0	0	0	0	0	0	0	0	0	0	0	0	0	0	0	0	0	0	0	0	0	0	0	0	0	0	0	0	0	0	0	0	0	0	0	0	0	0	0	0
ASV499	Stramenopila	Heterokontophyta	Oomycetes	Pythiales	Pythiaceae	Pythium	Pythium acanthicum	0	62	0	0	0	0	0	0	0	0	0	0	0	0	0	0	0	0	0	0	0	0	0	0	0	0	0	0	0	0	0	0	0	0	0	0	0	0	0	0	0	0
ASV500			Chrysophyceae	Chromulinales	Chromulinaceae	Pedospumella	Pedospumella sp. JBM19	0	0	0	0	0	0	0	0	0	0	0	0	0	0	0	0	0	0	0	0	0	0	0	0	0	0	0	0	0	0	0	0	0	0	732	0	0	0	0	0	0	0
ASV501			Dinophyceae	Prorocentrales	Prorocentraceae	Prorocentrum	Prorocentrum micans	0	46	0	0	60	33	0	40	0	0	0	0	0	0	0	0	0	0	0	0	0	0	0	6	0	0	0	11	0	0	0	0	0	0	0	0	0	0	0	0	0	0
ASV502	Stramenopila	Heterokontophyta	Oomycetes	Pythiales	Pythiaceae	Pythium	Pythium acanthicum	0	0	0	0	0	0	0	0	0	0	0	0	0	0	0	0	0	0	0	0	0	0	0	0	0	0	0	0	0	0	0	0	0	0	0	0	0	0	0	0	0	0
ASV503	Fungi	'uncultured fungus'	'uncultured fungus'	'uncultured fungus'	'uncultured fungus'	'uncultured fungus'	uncultured fungus	0	0	0	0	0	0	0	0	0	0	0	0	0	0	0	0	0	0	0	0	0	0	0	0	0	0	0	0	0	0	0	0	0	0	0	0	0	0	0	0	0	0
ASV504	Stramenopila	Heterokontophyta	Oomycetes	Pythiales	Pythiaceae	Pythium	Pythium heterothallicum	0	0	0	0	0	0	0	0	0	0	0	0	0	0	0	0	0	0	0	0	0	0	0	0	0	0	0	0	0	0	0	0	0	0	0	0	0	0	0	0	0	0
ASV505	Stramenopila	Heterokontophyta	Oomycetes	Myzocytiopsidales	Myzocytiopsidaceae	Myzocytiopsis	Myzocytiopsis vermicola	0	132	0	0	0	0	0	199	0	0	0	0	0	0	0	0	0	0	0	0	0	0	0	0	0	0	0	0	0	0	0	0	0	0	0	0	0	0	0	0	0	0
ASV506	Stramenopila	Heterokontophyta	Oomycetes	Pythiales	Pythiaceae	Pythium	Pythium violae	0	0	0	0	0	0	127	0	0	105	0	0	0	0	0	0	0	0	0	0	0	0	0	0	0	0	0	0	0	0	0	0	0	0	0	0	0	0	0	0	0	0
ASV507	Stramenopila	Heterokontophyta	Oomycetes	Peronosporales	Peronosporaceae	Hyaloperonospora	Hyaloperonospora cochleariae	0	0	0	0	0	0	0	15	0	0	0	0	0	100	0	0	0	19	0	0	0	0	0	0	0	54	0	0	12	0	0	0	0	0	0	0	0	0	0	0	13	0
ASV508	Stramenopila	Heterokontophyta	Oomycetes	Pythiales	Pythiaceae	Globisporangium	Globisporangium intermedium	53	0	0	0	0	0	0	0	0	0	0	0	0	0	0	0	0	0	0	0	0	0	0	0	0	0	0	0	0	0	0	0	0	0	0	0	0	0	0	0	0	0
ASV509			Chrysophyceae	Chromulinales	Chromulinaceae	'Spumella-like'	Spumella-like flagellate 391f	0	0	0	0	0	0	0	0	0	0	5	0	0	0	0	0	0	0	0	0	0	72	54	0	0	0	0	0	0	0	0	0	0	0	0	0	0	0	0	0	0	0
ASV510	Stramenopila	Heterokontophyta	Oomycetes	Pythiales	Pythiaceae	Pythium	Pythium arrhenomanes	0	0	0	0	0	0	0	0	0	0	0	0	0	0	0	0	0	0	0	0	0	0	0	0	0	0	0	713	0	0	0	0	0	0	0	0	0	0	0	0	0	0
ASV511			Chrysophyceae	Chromulinales	Chromulinaceae	Pedospumella	Pedospumella encystans	17	0	0	0	0	0	0	0	0	0	0	23	0	0	0	0	0	0	0	0	0	0	0	0	0	0	37	0	35	0	0	128	0	0	0	0	0	0	0	136	0	103
ASV512	Stramenopila	Heterokontophyta	Oomycetes	Leptomitales		Apodachlya	Apodachlya minima	0	0	0	0	0	0	0	0	0	0	0	0	0	0	0	0	0	0	0	0	0	0	0	0	0	0	0	0	0	0	0	0	709	0	0	0	0	0	0	0	0	0
ASV513	Stramenopila	Heterokontophyta	Oomycetes			Haptoglossa	Haptoglossa zoospora	0	0	0	0	0	0	0	0	0	0	0	0	0	0	0	0	0	0	0	0	0	0	0	0	0	0	0	0	0	0	0	0	0	0	0	419	0	0	0	0	0	0
ASV514	Stramenopila	Heterokontophyta	Oomycetes	Pythiales	Pythiaceae	Pythium	Pythium tracheiphilum	0	0	0	0	0	0	0	0	0	0	0	0	0	0	0	0	0	0	0	0	0	0	0	0	0	0	0	0	0	0	0	0	0	0	0	0	0	0	0	0	0	0
ASV515		Crenarchaeota	Thermoprotei	Sulfolobales	Sulfolobaceae	Sulfolobus	Sulfolobus islandicus	0	0	0	0	0	0	0	0	0	0	0	0	0	0	0	0	0	0	0	0	0	0	0	0	0	0	0	0	0	0	0	0	0	0	0	0	0	0	0	0	0	0
ASV516	Stramenopila	Heterokontophyta	Oomycetes	Pythiales	Pythiaceae	Pythium	Pythium camurandrum	0	0	0	0	700	0	0	0	0	0	0	0	0	0	0	0	0	0	0	0	0	0	0	0	0	0	0	0	0	0	0	0	0	0	0	0	0	0	0	0	0	0
ASV517	Stramenopila	Heterokontophyta	Oomycetes	Pythiales	Pythiogetonaceae	Pythiogeton	Pythiogeton zizaniae	0	102	0	0	0	364	0	0	0	0	0	0	0	0	0	0	0	0	0	0	0	0	0	0	79	0	0	0	0	0	0	0	0	0	0	0	0	0	0	0	0	0
ASV518	Stramenopila	Heterokontophyta	Oomycetes	Pythiales	Pythiaceae	Pythium	Pythium carolinianum	0	0	0	0	0	0	0	0	0	0	0	0	0	0	0	0	0	0	0	0	0	0	0	0	0	0	0	0	0	0	0	0	0	0	0	0	0	0	0	0	0	0
ASV519	Stramenopila	Heterokontophyta	Oomycetes		Lagenaceae	Lagena	Lagena radicicola	0	0	0	0	0	0	0	131	0	0	0	0	0	0	0	0	0	0	0	0	0	0	0	0	0	0	0	0	0	0	0	0	0	0	0	0	0	0	0	0	0	0
ASV520	Fungi	'uncultured fungus'	'uncultured fungus'	'uncultured fungus'	'uncultured fungus'	'uncultured fungus'	uncultured fungus	0	16	0	0	0	0	0	0	0	0	0	0	0	0	0	0	0	0	0	0	0	0	0	7	15	0	0	0	0	0	0	0	0	0	19	0	0	0	0	12	2	0
ASV521	Stramenopila	Heterokontophyta	Oomycetes	Saprolegniales	Saprolegniaceae	Saprolegnia	Saprolegnia terrestris	0	0	0	0	0	0	0	0	0	0	0	0	0	0	0	0	0	0	0	0	0	0	0	0	0	0	0	0	0	0	55	0	0	0	0	0	0	0	0	0	0	76
ASV522	Stramenopila	Heterokontophyta	Oomycetes	Pythiales	Pythiaceae	Pythium	Pythium monospermum	0	0	0	0	97	0	0	0	0	0	0	0	0	0	0	0	0	0	0	0	0	0	0	0	0	0	0	0	0	0	0	0	0	0	0	0	0	0	0	0	0	0
ASV524	Fungi	'uncultured fungus'	'uncultured fungus'	'uncultured fungus'	'uncultured fungus'	'uncultured fungus'	uncultured fungus	0	0	0	0	0	0	0	0	0	555	0	0	0	0	0	0	0	0	0	0	0	0	0	0	0	0	0	0	0	0	0	0	0	0	0	0	0	0	0	0	0	0
ASV525	Stramenopila	Heterokontophyta	Oomycetes	Pythiales	Pythiaceae	Pythium	Pythium sp. LY221g	0	0	0	0	0	0	0	0	0	0	0	0	0	0	0	0	0	0	0	0	0	0	689	0	0	0	0	0	0	0	0	0	0	0	0	0	0	0	0	0	0	0
ASV526	Stramenopila	Heterokontophyta	Oomycetes	Pythiales	Pythiaceae	Pythium	Pythium mastophorum	0	0	0	0	0	0	0	0	0	0	0	0	33	528	0	0	0	0	0	0	0	0	0	0	0	0	0	0	91	0	0	0	0	0	0	0	0	0	0	0	0	0
ASV527	Stramenopila	Heterokontophyta	Oomycetes	Lagenidiales	Lagenidiaceae	Lagenidium	Lagenidium sp. SL10	0	0	0	0	0	27	0	0	0	0	0	0	0	0	0	0	0	0	0	0	0	0	0	0	0	0	0	0	0	0	0	0	0	0	0	0	0	0	0	0	0	0
ASV528			Chrysophyceae	Chromulinales	Chromulinaceae	Spumella	Spumella rivalis	0	0	0	0	0	0	0	0	0	0	25	3	0	0	0	0	0	0	0	0	0	0	0	2	0	15	0	0	0	0	0	0	13	0	0	0	0	0	0	64	0	52
ASV529	Stramenopila	Heterokontophyta	Oomycetes	Pythiales	Pythiogetonaceae	Pythiogeton	Pythiogeton zizaniae	0	0	0	0	0	489	84	0	0	0	0	0	0	0	0	0	0	0	0	0	0	0	0	0	93	0	0	0	0	0	0	0	0	0	0	0	0	0	0	0	0	0
ASV530	Stramenopila	Heterokontophyta	Oomycetes	Pythiales	Pythiaceae	Pythium	Pythium sp. unique1	0	0	0	0	0	0	0	0	0	0	0	0	0	0	0	0	0	0	0	0	0	0	681	0	0	0	0	0	0	0	0	0	0	0	0	0	0	0	0	0	0	0
ASV531	Stramenopila	Heterokontophyta	Oomycetes			Haptoglossa	Haptoglossa zoospora	0	0	0	0	0	0	0	0	0	0	0	0	0	0	0	0	0	0	0	0	0	0	0	0	0	0	0	0	0	0	0	0	0	0	0	0	0	0	0	0	0	0
ASV532	Metazoa	Arthropoda	Insecta	Hymenoptera	Apidae	Apis	Apis dorsata	0	0	0	0	0	0	0	0	0	0	0	0	0	0	0	5	0	0	0	0	0	450	221	0	0	0	0	0	0	0	0	0	0	0	0	0	0	0	0	0	0	0
ASV533	Stramenopila	Heterokontophyta	Oomycetes	Pythiales	Pythiaceae	Pythium	Pythium sp. 96-224	0	0	0	0	0	0	0	0	0	0	0	0	0	0	0	0	0	0	0	0	0	0	0	0	0	0	0	0	0	0	0	0	0	0	0	0	0	0	0	0	0	293
ASV534	Stramenopila	Heterokontophyta	Oomycetes	Myzocytiopsidales	Myzocytiopsidaceae	Myzocytiopsis	Myzocytiopsis osiris	0	0	0	0	23	32	22	28	69	0	0	0	0	0	0	0	0	0	0	0	0	0	0	0	64	0	0	0	0	0	0	0	0	0	0	0	0	0	0	0	0	0
ASV535	Stramenopila	Heterokontophyta	Oomycetes			Haptoglossa	Haptoglossa zoospora	0	0	0	0	0	0	0	0	0	0	0	0	0	0	0	0	0	125	0	0	0	121	0	0	0	0	0	0	0	0	0	0	0	0	0	0	0	0	0	0	0	0
ASV536	Stramenopila	Heterokontophyta	Oomycetes	Pythiales	Pythiaceae	Pythium	Pythium irregulare	0	0	0	0	0	0	0	0	0	0	0	0	0	0	0	0	0	0	0	0	0	0	0	0	0	0	63	0	0	0	0	0	0	0	0	0	0	0	0	0	0	214
ASV537	Viridiplantae	Streptophyta	Magnoliopsida	Malpighiales	Salicaceae	Populus	Populus trichocarpa	0	0	0	0	0	0	0	0	0	0	0	0	0	0	0	0	0	0	0	0	0	0	0	0	0	0	0	0	0	0	0	0	0	0	0	0	0	0	0	0	0	0
ASV538	Stramenopila	Heterokontophyta	Oomycetes	Pythiales	Pythiaceae	Globisporangium	Globisporangium intermedium	0	0	0	0	0	0	0	0	0	0	0	0	0	0	0	0	0	0	0	0	0	0	0	0	130	0	0	0	0	0	0	0	0	0	0	0	0	0	0	0	0	0
ASV539	Stramenopila	Heterokontophyta	Oomycetes	Pythiales	Pythiaceae	Pythium	Pythium sp. FL-2016f	0	0	0	0	0	0	0	148	0	165	0	0	0	0	0	0	0	0	0	0	0	0	0	0	0	0	0	0	0	0	0	0	0	0	0	0	0	0	0	0	0	0
ASV540							eukaryotic synthetic construct	0	0	0	0	0	0	0	0	0	0	0	0	0	0	0	0	0	0	0	0	0	0	0	0	0	0	0	0	0	0	0	0	0	0	300	0	0	0	0	0	0	0
ASV541	Fungi	'uncultured fungus'	'uncultured fungus'	'uncultured fungus'	'uncultured fungus'	'uncultured fungus'	uncultured fungus	0	151	0	0	0	0	0	0	0	0	0	0	0	0	0	0	0	0	0	0	0	0	0	0	0	342	171	0	0	0	0	0	0	0	0	0	0	0	0	0	0	0
ASV542			Chrysophyceae	Chromulinales	Chromulinaceae	'Spumella-like'	Spumella-like flagellate 391f	0	0	0	0	0	0	0	0	0	0	0	0	0	0	0	0	0	0	0	0	0	0	0	0	0	0	0	0	0	0	0	0	0	0	0	0	0	0	0	0	0	0
ASV543			Chrysophyceae	Chromulinales	Chromulinaceae	Spumella	Spumella rivalis	0	0	0	0	0	0	0	0	0	0	0	0	10	0	0	0	0	0	0	0	6	0	0	0	0	3	0	0	0	0	0	0	49	0	26	0	0	0	0	169	0	4
ASV544			Chrysophyceae	Chromulinales	Chromulinaceae	Spumella	Spumella sp.	0	0	0	0	0	0	0	0	0	0	0	0	0	0	0	0	17	0	0	0	0	392	0	0	0	0	0	0	0	0	0	0	0	0	0	0	0	0	0	0	0	0
ASV545	Stramenopila	Heterokontophyta	Oomycetes	Pythiales	Pythiaceae	Pythium	Pythium sp. WJB-1	0	0	0	0	0	0	500	0	154	0	0	0	0	0	0	0	0	0	0	0	0	0	0	0	0	0	0	0	0	0	0	0	0	0	0	0	0	0	0	0	0	0
ASV546		Proteobacteria	Gammaproteobacteria	Aeromonadales	Aeromonadaceae	Aeromonas	Aeromonas hydrophila	0	0	0	0	0	0	0	0	0	0	191	9	0	0	0	0	0	0	0	0	0	0	0	0	0	0	0	0	0	0	0	0	0	0	0	0	0	0	0	0	0	0
ASV547	Fungi	'uncultured fungus'	'uncultured fungus'	'uncultured fungus'	'uncultured fungus'	'uncultured fungus'	uncultured fungus	0	0	6	0	0	0	0	35	29	0	0	0	0	0	0	0	0	0	0	0	0	0	0	0	0	132	5	0	0	0	0	0	0	0	0	45	0	0	0	0	0	0
ASV548	Stramenopila	Heterokontophyta	Oomycetes	Pythiales	Pythiaceae	Pythium	Pythium attrantheridium	0	0	0	0	499	146	0	0	0	0	0	0	0	0	0	0	0	0	0	0	0	0	0	0	0	0	0	0	0	0	0	0	0	0	0	0	0	0	0	0	0	0
ASV549	Stramenopila	Heterokontophyta	Oomycetes	Saprolegniales	Saprolegniaceae	Pythiopsis	Pythiopsis intermedia	0	0	0	0	0	0	0	148	0	0	0	0	0	0	0	0	0	0	0	0	0	0	0	0	0	0	0	0	0	0	0	0	0	0	0	0	0	0	0	0	51	0
ASV550	Metazoa	Chordata	Actinopteri	Cypriniformes	Cyprinidae	Cyprinus	Cyprinus carpio	0	0	0	0	0	0	0	0	0	0	0	0	0	0	0	0	0	0	0	0	0	0	0	0	0	0	0	0	0	0	0	0	0	0	0	0	0	0	0	0	0	0
ASV551	Stramenopila	Heterokontophyta	Oomycetes	Pythiales	Pythiaceae	Pythium	Pythium sp. FL-2016h	102	0	0	0	0	0	0	181	0	0	0	0	0	0	0	0	0	0	0	0	0	0	0	0	0	0	0	0	0	0	0	0	0	0	0	0	0	0	0	0	0	0
ASV552			Chrysophyceae			'Spumella-like'	Spumella-like flagellate JBC/S24	0	0	0	0	0	0	0	0	0	0	0	0	0	0	0	20	0	0	0	0	0	0	0	0	0	0	0	0	0	0	0	0	0	0	0	0	0	0	0	0	0	0
ASV553			Dinophyceae	Prorocentrales	Prorocentraceae	Prorocentrum	Prorocentrum micans	0	0	0	0	0	0	0	0	0	0	0	0	0	0	0	0	0	0	0	0	0	0	0	0	0	0	0	0	0	0	0	35	0	66	0	0	0	63	0	0	0	0
ASV554	Stramenopila	Heterokontophyta	Oomycetes	Peronosporales	Peronosporaceae	Hyaloperonospora	Hyaloperonospora barbareae	0	0	0	0	0	0	0	0	0	0	0	0	0	0	0	0	0	0	0	0	0	0	0	0	0	0	0	0	0	0	0	0	0	0	0	0	126	0	0	0	0	0
ASV555	Stramenopila	Heterokontophyta	Oomycetes	Pythiales	Pythiaceae	Globisporangium	Globisporangium ultimum	0	0	0	0	0	0	0	0	0	0	0	0	0	0	414	189	22	0	0	0	0	0	0	0	0	0	0	0	0	0	0	0	0	0	0	0	0	0	0	0	0	0
ASV556	Stramenopila	Heterokontophyta	Oomycetes			Haptoglossa	Haptoglossa zoospora	32	0	0	0	0	0	0	0	0	0	0	0	0	0	0	0	0	0	0	0	0	0	0	0	0	0	0	0	0	0	0	0	0	0	0	322	183	0	0	0	0	0
ASV557	Stramenopila	Heterokontophyta	Oomycetes	Lagenidiales	Lagenidiaceae	Lagenidium	Lagenidium sp. SL10	0	0	0	0	0	0	0	0	0	0	0	0	0	0	0	0	0	0	0	0	193	0	0	0	0	0	0	0	0	0	0	0	253	0	0	0	0	0	0	0	0	0
ASV558	Fungi	'uncultured fungus'	'uncultured fungus'	'uncultured fungus'	'uncultured fungus'	'uncultured fungus'	uncultured fungus	2	0	0	0	0	0	0	0	0	0	0	0	0	0	0	0	0	0	0	0	0	0	0	0	0	0	0	0	0	0	0	0	0	0	0	21	0	3	0	91	30	0
ASV559	Fungi	'uncultured fungus'	'uncultured fungus'	'uncultured fungus'	'uncultured fungus'	'uncultured fungus'	uncultured fungus	0	0	0	0	0	0	0	0	0	0	0	0	0	0	0	0	0	0	0	0	0	0	0	0	0	269	0	0	0	0	0	0	0	0	0	0	0	0	0	0	0	0
ASV560	Stramenopila	Heterokontophyta	Oomycetes	Pythiales	Pythiaceae	Phytopythium	Phytopythium vexans	0	0	0	0	0	0	0	0	0	0	0	0	0	0	0	0	0	0	0	0	0	0	0	0	0	0	0	0	0	0	0	0	0	0	0	0	0	0	0	0	0	0
ASV561	Stramenopila	Heterokontophyta	Oomycetes	Pythiales	Pythiaceae	Pythium	Pythium sp. V1	0	29	0	0	0	0	0	46	0	390	0	0	0	0	0	0	0	0	0	0	9	0	0	0	0	0	0	0	0	0	0	0	0	0	0	0	0	0	0	0	0	0
ASV562	Stramenopila	Heterokontophyta	Oomycetes	Pythiales	Pythiaceae	Pythium	Pythium aff. attrantheridum	0	0	0	0	0	0	0	0	0	0	0	0	0	0	0	0	0	0	0	0	0	0	0	0	0	0	0	0	0	350	0	0	0	0	0	0	0	0	0	0	0	0
ASV563	Stramenopila	Heterokontophyta	Oomycetes	Pythiales	Pythiaceae	Pythium	Pythium sp. UZ277	0	0	0	0	0	0	0	0	0	0	0	0	0	0	0	0	0	0	0	0	0	0	0	0	0	0	0	0	0	0	0	0	0	0	0	0	0	0	0	0	0	0
ASV564	Stramenopila	Heterokontophyta	Oomycetes	Pythiales	Pythiaceae	Pythium	Pythium junctum	0	0	0	0	0	0	0	0	0	0	0	0	43	0	0	0	0	0	0	0	0	0	0	0	0	0	0	0	0	0	0	0	0	0	0	0	0	0	0	0	0	0
ASV565	Stramenopila	Heterokontophyta	Oomycetes	Saprolegniales	Saprolegniaceae	Aphanomyces	Aphanomyces stellatus	0	0	0	0	0	0	0	0	0	0	0	0	0	414	0	0	0	0	0	0	0	0	0	0	0	0	0	0	0	0	0	0	0	0	0	0	0	0	0	0	0	0
ASV566	Stramenopila	Heterokontophyta	Oomycetes	Saprolegniales	Saprolegniaceae	Achlya	Achlya sparrowii	0	0	0	0	0	0	0	0	0	0	0	0	0	0	0	0	0	0	0	0	0	0	0	0	0	0	0	0	0	0	0	0	0	0	0	0	0	0	0	0	0	0
ASV567	Stramenopila	Heterokontophyta	Oomycetes	Pythiales	Pythiaceae	Pythium	Pythium attrantheridium	0	0	0	0	0	0	0	0	0	0	0	0	0	124	0	0	0	0	0	0	0	0	0	0	0	254	95	0	0	0	0	0	0	0	0	0	0	0	0	0	0	0
ASV568	Stramenopila	Heterokontophyta	Oomycetes	Pythiales	Pythiaceae	Pythium	Pythium heterothallicum	0	0	0	0	0	0	0	0	0	0	0	0	0	0	0	0	0	0	0	0	0	0	0	0	0	0	0	0	0	0	0	0	0	0	0	0	0	0	0	0	0	0
ASV569	Stramenopila	Heterokontophyta	Oomycetes	Saprolegniales	Saprolegniaceae	Aphanomyces	Aphanomyces sp.	0	0	0	0	0	0	0	0	0	0	0	0	0	0	0	0	0	0	0	0	0	0	0	0	0	0	0	0	0	0	0	0	0	0	0	0	0	0	0	0	0	0
ASV570	Stramenopila	Heterokontophyta	Oomycetes	Pythiales	Pythiaceae	Globisporangium	Globisporangium paroecandrum	0	0	0	0	0	0	0	0	0	0	0	0	0	0	0	0	0	0	0	0	0	0	0	0	0	0	0	0	0	0	0	0	0	0	0	0	0	0	0	0	0	0
ASV571	Stramenopila	Heterokontophyta	Oomycetes	Peronosporales	Peronosporaceae	Phytophthora	Phytophthora clandestina	0	596	0	0	0	0	0	0	0	0	0	0	0	0	0	0	0	0	0	0	0	0	0	0	0	0	0	0	0	0	0	0	0	0	0	0	0	0	0	0	0	0
ASV572	Stramenopila	Heterokontophyta	Oomycetes	Pythiales	Pythiaceae	Pythium	Pythium sp. C73	0	0	0	0	0	0	0	0	0	593	0	0	0	0	0	0	0	0	0	0	0	0	0	0	0	0	0	0	0	0	0	0	0	0	0	0	0	0	0	0	0	0
ASV573			Chrysophyceae	Chromulinales	Chromulinaceae	Spumella	Spumella rivalis	5	0	16	0	0	0	0	0	0	0	0	0	0	0	0	0	0	0	0	0	0	0	0	0	0	0	0	0	0	0	0	0	21	0	0	0	7	0	0	93	0	43
ASV574	Stramenopila	Heterokontophyta	Oomycetes	Pythiales	Pythiaceae	Pythium	Pythium heterothallicum	0	0	0	0	0	0	0	0	0	0	0	0	0	0	0	0	0	0	0	0	0	0	0	0	0	121	0	0	161	0	0	0	0	0	0	0	0	181	0	0	0	0
ASV575	Stramenopila	Heterokontophyta	Oomycetes	Pythiales	Pythiaceae	Globisporangium	Globisporangium intermedium	0	0	0	0	0	0	0	0	0	0	0	0	0	0	0	0	0	0	0	0	0	0	0	0	0	320	0	0	0	0	0	0	0	0	0	0	0	0	0	0	0	0
ASV576			Chrysophyceae			Segregatospumella	Segregatospumella sp.	0	0	0	0	0	0	0	0	0	0	0	0	0	0	0	0	0	0	0	0	0	0	0	0	0	0	0	0	0	0	0	0	0	0	0	0	0	0	0	0	0	0
ASV577			Chrysophyceae	Chromulinales	Chromulinaceae	Spumella	Spumella sp.	0	0	0	0	0	0	0	0	0	48	0	0	0	0	0	0	0	0	0	0	0	0	0	0	0	0	0	0	0	0	0	0	0	0	0	0	0	0	0	0	0	0
ASV578	Stramenopila	Heterokontophyta	Oomycetes	Saprolegniales	Saprolegniaceae	Saprolegnia	Saprolegnia sp. SAP4	0	0	0	0	0	0	0	0	0	0	0	0	0	0	0	0	0	0	0	0	0	0	0	0	0	0	0	0	0	0	0	0	0	0	0	0	0	0	0	0	0	0
ASV579			Dinophyceae	Prorocentrales	Prorocentraceae	Prorocentrum	Prorocentrum micans	0	20	0	0	0	0	0	293	0	0	0	0	55	174	0	0	0	0	0	0	0	0	0	0	0	0	0	0	0	0	0	0	0	0	0	0	0	0	0	0	0	0
ASV580	Stramenopila	Heterokontophyta	Oomycetes	Pythiales	Pythiaceae	Pythium	Pythium heterothallicum	0	166	0	0	0	0	0	0	0	0	0	0	0	0	0	0	0	0	0	0	0	0	0	0	0	0	0	184	0	0	0	0	0	0	0	0	0	0	0	0	0	0
ASV581	Stramenopila	Heterokontophyta	Oomycetes	Saprolegniales	Saprolegniaceae	Leptolegnia	Leptolegnia eccentrica	0	0	0	0	0	0	0	0	0	0	0	0	0	0	0	0	0	0	0	0	0	0	0	0	0	0	0	0	0	0	0	0	0	0	0	0	0	0	0	0	0	0
ASV582	Stramenopila	Heterokontophyta	Oomycetes	Pythiales	Pythiaceae	Globisporangium	Globisporangium spinosum	0	0	0	0	0	0	0	0	0	0	0	0	0	0	0	0	0	0	0	0	0	0	0	0	0	0	0	0	0	0	0	0	0	0	0	0	0	0	0	0	0	0
ASV583	Stramenopila	Heterokontophyta	Oomycetes		Lagenaceae	Lagena	Lagena radicicola	0	0	0	0	0	0	0	0	0	0	0	0	0	0	0	0	0	0	0	0	0	345	144	0	0	0	0	0	0	0	0	0	0	0	0	0	0	0	0	0	0	0
ASV584	Stramenopila	Heterokontophyta	Oomycetes	Pythiales	Pythiaceae	Pythium	Pythium mamillatum	0	0	0	0	0	0	0	0	0	0	0	0	0	0	0	0	0	0	93	27	0	0	0	0	0	210	0	0	0	0	0	130	0	0	0	0	0	0	0	0	38	75
ASV585	Stramenopila	Heterokontophyta	Oomycetes	Saprolegniales	Saprolegniaceae	Pythiopsis	Pythiopsis humphreyana	0	0	0	0	0	0	0	0	0	0	0	37	0	0	0	0	0	0	0	0	0	0	0	0	0	0	55	65	0	0	0	0	0	324	0	0	0	0	0	0	41	0
ASV587	Fungi	'uncultured fungus'	'uncultured fungus'	'uncultured fungus'	'uncultured fungus'	'uncultured fungus'	uncultured fungus	0	0	0	0	0	0	0	0	0	0	0	0	0	0	0	0	0	0	0	0	0	0	0	0	0	0	0	0	0	0	0	0	0	0	0	0	0	0	0	0	0	0
ASV588	Stramenopila	Heterokontophyta	Oomycetes	Pythiales	Pythiaceae	Pythium	Pythium aff. monospermum	0	0	0	0	0	0	0	0	0	0	0	0	0	0	0	0	0	0	0	0	0	0	0	0	0	0	0	0	0	0	0	0	0	0	0	0	0	0	0	0	0	0
ASV589			Chrysophyceae	Chromulinales	Chromulinaceae	'Spumella-like'	Spumella-like flagellate 1031	0	0	0	0	0	0	0	0	0	0	0	0	0	0	0	0	0	0	0	0	0	51	0	0	0	31	0	0	0	0	0	0	0	0	0	0	0	0	0	0	0	0
ASV590	Metazoa	Chordata	Actinopteri	Gonorynchiformes	Chanidae	Chanos	Chanos chanos	0	0	0	0	0	0	0	0	0	0	0	0	0	0	0	0	0	0	0	0	0	0	0	0	0	0	0	0	0	0	0	0	0	0	0	178	388	0	0	0	0	0
ASV591	Metazoa	Chordata	Actinopteri	Cypriniformes	Cyprinidae	Cyprinus	Cyprinus carpio	0	0	0	0	0	0	0	0	29	0	0	0	0	0	0	0	0	0	0	0	0	0	0	12	0	0	0	0	0	0	0	0	0	0	0	0	0	0	0	0	0	0
ASV592			Chrysophyceae			'Spumella-like'	Spumella-like flagellate JBL14	0	0	0	0	0	0	0	0	0	0	0	0	0	563	0	0	0	0	0	0	0	0	0	0	0	0	0	0	0	0	0	0	0	0	0	0	0	0	0	0	0	0
ASV593			Dinophyceae	Prorocentrales	Prorocentraceae	Prorocentrum	Prorocentrum micans	0	0	0	0	0	0	0	0	0	0	0	0	0	0	49	0	0	0	0	0	0	0	0	0	0	0	0	0	0	0	0	0	0	0	0	0	0	0	0	0	0	0
ASV594	Metazoa	Arthropoda	Insecta	Hymenoptera	Apidae	Apis	Apis dorsata	0	0	0	19	0	0	0	0	0	0	0	0	0	0	0	0	0	0	0	0	0	457	50	0	0	0	0	0	0	0	0	0	0	0	0	0	0	0	0	0	0	0
ASV595	Metazoa	Chordata	Actinopteri	Gadiformes	Gadidae	Gadus	Gadus morhua	0	0	0	22	0	0	0	0	0	0	0	0	0	0	0	0	0	0	0	0	0	435	105	0	0	0	0	0	0	0	0	0	0	0	0	0	0	0	0	0	0	0
ASV596	Stramenopila	Heterokontophyta	Oomycetes	Leptomitales		Apodachlya	Apodachlya minima	0	0	0	0	0	0	0	0	0	0	0	0	0	0	0	0	0	0	0	0	0	0	0	0	0	0	0	0	0	0	0	0	0	0	0	0	0	0	0	0	0	0
ASV597	Stramenopila	Heterokontophyta	Oomycetes	Pythiales	Pythiaceae	Pythium	Pythium aristosporum	0	0	0	0	0	0	0	0	0	0	0	0	0	0	0	0	0	0	0	0	0	0	0	0	0	0	0	0	0	0	0	0	0	0	0	0	0	0	0	294	0	0
ASV598	Stramenopila	Heterokontophyta	Oomycetes	Saprolegniales	Saprolegniaceae	Saprolegnia	Saprolegnia terrestris	0	0	33	12	0	0	0	0	0	0	0	0	0	0	8	37	0	0	0	0	0	0	0	0	0	0	0	0	0	0	0	0	0	0	0	0	0	0	0	0	0	0
ASV599	Stramenopila	Heterokontophyta	Oomycetes	Pythiales	Pythiogetonaceae	Pythiogeton	Pythiogeton zizaniae	0	0	0	0	0	0	0	0	0	0	0	0	0	0	0	0	0	0	0	0	0	0	0	0	0	0	0	0	0	0	0	0	0	0	0	0	0	0	0	0	0	0
ASV600	Stramenopila	Heterokontophyta	Oomycetes	Saprolegniales	Saprolegniaceae	Aphanomyces	Aphanomyces sp. NJM 0906	0	0	0	0	0	0	0	0	0	0	0	0	0	0	0	0	0	0	0	0	0	0	0	0	0	0	0	0	0	0	0	0	0	0	0	0	0	0	0	0	0	0
ASV601			Chrysophyceae	Chromulinales	Chromulinaceae	Pedospumella	Pedospumella sp.	0	0	0	15	0	0	0	0	0	0	0	0	0	0	0	0	0	0	0	0	0	0	0	0	0	538	0	0	0	0	0	0	0	0	0	0	0	0	0	0	0	0
ASV602	Stramenopila	Heterokontophyta	Oomycetes	Pythiales	Pythiaceae	Pythium	Pythium attrantheridium	0	0	0	0	0	0	0	0	0	0	0	0	0	0	0	0	0	0	0	0	0	0	0	0	0	0	0	0	0	0	0	0	0	0	0	0	0	0	0	0	0	0
ASV603	Metazoa	Chordata	Actinopteri	Spariformes	Sparidae	Sparus	Sparus aurata	0	0	0	0	0	0	0	0	0	0	0	0	0	0	0	0	0	0	0	0	0	0	0	0	0	0	0	0	0	0	0	0	0	0	0	0	0	0	0	0	0	0
ASV604	Stramenopila	Heterokontophyta	Oomycetes	'uncultured Oomycetes'	'uncultured Oomycetes'	'uncultured Oomycetes'	uncultured Oomycetes	0	0	0	0	0	0	0	0	0	0	0	0	0	0	0	0	0	0	0	0	0	0	0	0	0	0	0	0	0	0	0	0	0	0	0	0	0	0	0	0	0	0
ASV605	Stramenopila	Heterokontophyta	Oomycetes	Saprolegniales	Saprolegniaceae	Aphanomyces	Aphanomyces sp. APH2	0	0	0	0	0	0	0	0	0	0	0	0	0	0	0	0	0	0	0	0	0	0	0	0	0	0	0	0	0	0	0	0	0	0	0	0	0	0	0	0	0	254
ASV606	Stramenopila	Heterokontophyta	Oomycetes	Pythiales	Pythiaceae	Globisporangium	Globisporangium intermedium	0	0	0	0	5	19	109	0	0	129	0	0	0	0	0	0	0	0	0	0	0	0	0	230	0	0	0	0	0	0	0	0	0	0	0	0	0	0	0	0	0	0
ASV607	Stramenopila	Heterokontophyta	Oomycetes	Pythiales	Pythiaceae	Pythium	Pythium sp. unique1	0	0	0	0	0	0	0	0	0	0	0	0	0	0	0	0	0	0	0	0	0	0	0	0	0	0	0	0	0	0	0	0	0	0	0	0	0	0	0	0	0	0
ASV608			Chrysophyceae	Chromulinales	Chromulinaceae	Spumella	Spumella sp.	0	0	0	0	0	0	0	0	0	0	120	0	0	0	0	0	0	0	0	0	0	0	0	0	0	0	0	0	0	0	0	12	54	79	0	0	0	0	0	0	0	0
ASV609	Stramenopila	Heterokontophyta	Oomycetes	Pythiales	Pythiaceae	Pythium	Pythium irregulare	0	0	0	0	0	0	0	0	0	0	0	0	0	0	0	0	0	0	446	0	0	0	0	0	0	0	0	0	0	0	0	0	0	0	66	0	0	0	0	0	0	0
ASV610	Stramenopila	Heterokontophyta	Oomycetes	Pythiales	Pythiaceae	Globisporangium	Globisporangium oryzicola	0	0	0	0	0	0	0	0	0	0	0	0	0	0	0	0	0	0	0	0	38	0	0	0	0	0	0	0	0	0	0	0	0	0	0	0	0	0	0	0	0	0
ASV611	Fungi	'uncultured fungus'	'uncultured fungus'	'uncultured fungus'	'uncultured fungus'	'uncultured fungus'	uncultured fungus	0	0	27	0	0	0	0	0	0	0	0	0	0	0	0	0	0	0	0	0	0	0	0	0	0	62	0	0	0	0	0	0	24	18	0	179	82	0	0	16	0	34
ASV612	Stramenopila	Heterokontophyta	Oomycetes	Peronosporales	Peronosporaceae	Phytophthora	Phytophthora nicotianae	26	0	0	0	0	0	0	0	0	0	0	0	0	0	0	0	0	0	0	0	0	0	0	0	0	0	0	0	0	0	0	0	0	19	0	0	0	12	0	0	0	0
ASV613	Stramenopila	Heterokontophyta	Oomycetes	Pythiales	Pythiaceae	Pythium	Pythium acanthicum	0	0	0	0	0	0	0	0	0	0	0	0	0	0	0	0	0	0	0	0	83	0	0	0	0	0	0	38	0	0	0	0	0	0	0	0	0	0	0	0	0	0
ASV614	Stramenopila	Heterokontophyta	Oomycetes	Peronosporales	Peronosporaceae	Phytophthora	Phytophthora x cambivora	0	0	0	0	0	0	0	0	0	0	0	0	0	0	0	0	0	0	0	0	0	0	0	0	0	0	0	0	0	0	0	0	0	0	0	0	0	0	0	0	0	0
ASV615	Viridiplantae	Streptophyta	Magnoliopsida	Fabales	Fabaceae	Medicago	Medicago truncatula	0	0	0	0	0	0	0	0	0	0	0	0	0	0	0	0	0	0	0	0	0	0	0	0	0	0	0	0	0	0	0	0	0	0	0	0	0	0	0	0	0	0
ASV616			Chrysophyceae	Chromulinales	Chromulinaceae	Spumella	Spumella sp.	0	0	0	0	0	0	0	0	0	0	93	0	0	0	0	0	0	0	0	0	0	0	0	0	0	107	0	0	0	0	0	0	0	0	0	0	0	0	0	0	0	0
ASV617	Stramenopila	Heterokontophyta	Oomycetes	Pythiales	Pythiaceae	Pythium	Pythium kandovanense	209	35	0	0	0	0	10	54	0	0	0	0	0	0	0	0	0	0	0	0	0	0	0	0	0	0	0	0	0	0	0	0	0	0	0	0	0	0	0	0	0	0
ASV618	Stramenopila	Heterokontophyta	Oomycetes	Saprolegniales	Saprolegniaceae	Pythiopsis	Pythiopsis intermedia	0	182	0	0	0	0	0	0	0	0	0	0	0	183	0	0	0	0	0	0	0	0	0	0	0	0	0	0	0	0	0	0	0	0	0	0	0	0	0	0	0	0
ASV619	Stramenopila	Heterokontophyta	Oomycetes	Saprolegniales	Saprolegniaceae	Thraustotheca	Thraustotheca clavata	0	0	0	0	0	0	0	0	0	0	0	0	0	0	5	0	0	0	0	0	0	0	0	0	0	0	0	0	0	0	0	0	0	0	0	0	0	0	0	0	0	0
ASV620	Stramenopila	Heterokontophyta	Oomycetes	Saprolegniales	Saprolegniaceae	Pythiopsis	Pythiopsis intermedia	0	0	0	0	0	0	0	0	0	0	0	0	0	0	0	0	0	0	0	0	0	0	0	0	0	0	0	0	0	0	0	0	0	0	0	0	0	0	0	0	0	0
ASV621	Fungi	'uncultured fungus'	'uncultured fungus'	'uncultured fungus'	'uncultured fungus'	'uncultured fungus'	uncultured fungus	0	0	0	0	0	0	0	0	0	0	0	23	0	0	0	0	0	0	0	0	42	0	0	0	0	0	0	3	0	0	0	0	0	0	0	0	0	0	0	0	0	0
ASV622	Metazoa	Chordata	Actinopteri	Kurtiformes	Apogonidae	Sphaeramia	Sphaeramia orbicularis	0	0	0	0	0	0	0	0	0	0	0	0	0	0	0	0	0	0	0	0	0	0	0	0	0	0	0	0	0	0	0	0	0	0	0	0	0	0	0	0	0	0
ASV623			Chrysophyceae			Segregatospumella	Segregatospumella sp.	0	0	0	0	0	0	0	0	0	0	0	0	0	0	0	0	0	0	0	0	0	0	0	0	0	0	0	0	0	0	0	0	0	0	0	0	429	0	0	0	0	0
ASV624			Chrysophyceae	Chromulinales	Chromulinaceae	Pedospumella	Pedospumella sp. JBM19	0	0	0	0	0	0	0	0	0	0	0	0	0	0	0	0	169	0	0	0	0	0	0	0	0	0	0	0	0	0	0	0	0	0	0	0	0	0	0	0	0	0
ASV625			Chrysophyceae	Chromulinales	Chromulinaceae	'Spumella-like'	Spumella-like flagellate 391f	0	0	0	0	0	0	0	0	0	0	0	0	0	0	0	0	0	0	0	0	0	0	0	0	0	0	0	0	0	0	0	0	0	0	0	0	0	0	0	0	0	47
ASV626	Stramenopila	Heterokontophyta	Oomycetes	Pythiales	Pythiaceae	Pythium	Pythium oligandrum	0	0	0	0	0	0	0	0	0	0	0	0	0	0	0	0	0	0	0	0	0	0	0	0	0	0	0	0	0	0	0	0	0	0	0	0	0	0	0	0	0	0
ASV627	Metazoa	Chordata	Mammalia	Primates	Cercopithecidae	Rhinopithecus	Rhinopithecus roxellana	0	0	498	19	0	0	0	0	0	0	0	0	0	0	0	0	0	0	0	0	0	0	0	0	0	0	0	0	0	0	0	0	0	0	0	0	0	0	0	0	0	0
ASV628	Metazoa	Arthropoda	Hexanauplia	Siphonostomatoida	Caligidae	Caligus	Caligus rogercresseyi	0	0	0	0	0	0	0	0	0	0	0	0	0	0	102	195	220	0	0	0	0	0	0	0	0	0	0	0	0	0	0	0	0	0	0	0	0	0	0	0	0	0
ASV629	Stramenopila	Heterokontophyta	Oomycetes	Pythiales	Pythiaceae	Pythium	Pythium sp. unique1sub3	0	0	0	0	0	0	0	0	0	0	0	154	0	0	0	0	0	0	0	0	0	0	0	0	0	0	0	0	0	0	0	0	0	0	0	0	0	0	0	0	0	0
ASV630	Stramenopila	Heterokontophyta	Oomycetes	Pythiales	Pythiaceae	Pythium	Pythium conidiophorum	0	92	0	0	81	20	0	0	0	0	0	0	0	0	0	0	0	0	0	0	0	0	0	0	0	0	0	0	0	0	0	0	0	0	0	0	0	0	0	0	0	0
ASV631	Fungi	'uncultured fungus'	'uncultured fungus'	'uncultured fungus'	'uncultured fungus'	'uncultured fungus'	uncultured fungus	0	0	0	0	0	0	0	0	0	0	0	0	0	0	0	0	0	0	0	0	0	0	0	0	0	0	0	0	0	0	0	0	0	0	0	0	0	0	0	244	0	0
ASV632	Stramenopila	Heterokontophyta	Oomycetes			Haptoglossa	Haptoglossa zoospora	0	0	509	0	0	0	0	0	0	0	0	0	0	0	0	0	0	0	0	0	0	0	0	0	0	0	0	0	0	0	0	0	0	0	0	0	0	0	0	0	0	0
ASV633	Stramenopila	Heterokontophyta	Oomycetes	Peronosporales	Peronosporaceae	Hyaloperonospora	Hyaloperonospora cochleariae	10	10	0	0	0	0	0	0	0	0	0	0	0	0	0	0	0	0	0	0	0	0	0	0	39	0	0	0	0	0	0	0	71	0	0	0	0	0	0	101	20	0
ASV634			Dinophyceae	Prorocentrales	Prorocentraceae	Prorocentrum	Prorocentrum micans	0	0	0	0	0	0	0	0	0	0	0	0	0	0	0	0	0	0	0	0	0	0	0	0	0	0	0	0	0	0	0	45	76	0	0	0	0	33	0	91	156	74
ASV635	Stramenopila	Heterokontophyta	Oomycetes	Pythiales	Pythiaceae	Pythium	Pythium polymastum	0	0	0	0	12	0	0	0	0	0	0	0	0	0	0	0	0	0	0	0	0	0	0	0	0	0	0	0	0	0	0	0	0	0	0	0	0	0	0	0	0	0
ASV636	Stramenopila	Heterokontophyta	Oomycetes	Lagenidiales	Lagenidiaceae	Lagenidium	Lagenidium juracyae	0	0	0	0	0	0	0	0	0	0	0	0	0	0	0	0	0	0	0	0	0	0	0	0	0	0	0	0	0	0	0	0	0	0	0	0	0	0	0	0	0	0
ASV637	Stramenopila	Heterokontophyta	Oomycetes	Lagenidiales	Lagenidiaceae	Lagenidium	Lagenidium sp. SL10	0	0	0	0	0	0	0	0	0	0	0	0	0	0	0	0	0	0	0	0	0	0	0	0	0	0	0	0	0	0	0	0	0	0	0	0	0	0	0	0	0	0
ASV638	Fungi	'uncultured fungus'	'uncultured fungus'	'uncultured fungus'	'uncultured fungus'	'uncultured fungus'	uncultured fungus	0	0	8	489	0	0	0	0	0	0	0	0	0	0	0	0	0	0	0	0	0	0	0	0	0	0	0	0	0	0	0	0	0	0	0	0	0	0	0	0	0	0
ASV639	Stramenopila	Heterokontophyta	Oomycetes	Pythiales	Pythiaceae	Pythium	Pythium kandovanense	0	0	0	0	0	0	0	0	0	0	0	0	0	0	0	0	0	0	0	0	0	0	0	0	0	0	0	0	0	0	0	0	0	0	0	0	0	0	0	0	0	0
ASV640		Bacillariophyta	Bacillariophyceae	Surirellales	Surirellaceae	Surirella	Surirella sp. CCAP 1071/2	0	0	0	0	145	0	350	0	0	0	0	0	0	0	0	0	0	0	0	0	0	0	0	0	0	0	0	0	0	0	0	0	0	0	0	0	0	0	0	0	0	0
ASV641			Chrysophyceae	Chromulinales	Chromulinaceae	Pedospumella	Pedospumella sp.	36	0	0	0	0	0	13	42	0	0	0	0	0	42	0	0	0	0	0	0	0	0	49	0	0	0	0	0	30	0	0	0	0	0	0	0	0	0	0	0	0	0
ASV642	Stramenopila	Heterokontophyta	Oomycetes			Haptoglossa	Haptoglossa zoospora	0	0	0	0	0	0	0	0	0	0	0	0	0	0	0	0	0	0	0	0	0	0	0	0	0	0	0	0	0	0	0	0	0	0	0	0	0	0	0	0	0	0
ASV643			Chrysophyceae	Chromulinales	Chromulinaceae	Spumella	Spumella sp.	0	0	0	0	0	0	0	0	0	0	0	0	0	0	0	0	0	0	0	0	0	0	0	0	0	0	0	0	0	0	0	0	0	0	0	0	0	0	0	0	0	0
ASV644			Chrysophyceae			'Spumella-like'	Spumella-like flagellate JBC/S24	159	113	0	0	0	0	0	0	0	0	0	0	0	110	0	0	0	0	34	0	0	0	0	0	0	0	0	10	0	0	0	0	0	0	0	0	0	0	0	0	0	0
ASV645	Viridiplantae	Streptophyta	Magnoliopsida	Fabales	Fabaceae	Vigna	Vigna unguiculata	0	0	0	0	0	0	0	0	0	0	0	0	0	0	0	0	0	0	0	0	0	0	0	0	0	0	0	0	0	0	0	0	0	0	0	0	0	0	0	0	0	0
ASV646			Chrysophyceae	Chromulinales	Chromulinaceae	'Spumella-like'	Spumella-like flagellate 1031	0	0	0	0	0	0	0	0	0	0	0	0	0	0	0	0	0	0	0	0	0	0	0	0	0	0	0	0	0	0	0	0	0	0	0	0	0	0	0	0	0	0
ASV647			Chrysophyceae	Chromulinales	Chromulinaceae	'Spumella-like'	Spumella-like flagellate 1031	0	0	0	0	0	0	0	0	0	0	0	0	0	0	0	0	0	0	0	0	0	0	0	0	0	0	0	0	0	0	0	0	36	0	0	0	12	0	0	0	0	0
ASV648	Fungi	'uncultured fungus'	'uncultured fungus'	'uncultured fungus'	'uncultured fungus'	'uncultured fungus'	uncultured fungus	0	0	0	0	0	0	0	0	0	0	0	0	0	0	0	0	0	0	0	0	0	0	0	0	0	0	0	0	0	0	0	0	483	0	0	0	0	0	0	0	0	0
ASV649	Stramenopila	Heterokontophyta	Oomycetes	Pythiales	Pythiaceae	Pythium	Pythium polymastum	0	0	0	0	0	0	0	0	0	0	0	0	0	0	0	0	0	0	0	0	0	0	0	0	0	0	0	0	0	0	0	0	483	0	0	0	0	0	0	0	0	0
ASV650	Fungi	'uncultured fungus'	'uncultured fungus'	'uncultured fungus'	'uncultured fungus'	'uncultured fungus'	uncultured fungus	0	19	0	0	0	0	0	0	0	7	72	0	11	9	0	2	0	0	0	0	0	0	0	0	0	0	20	0	37	0	0	0	2	0	0	0	0	0	0	0	0	0
ASV651			Dinophyceae	Prorocentrales	Prorocentraceae	Prorocentrum	Prorocentrum micans	0	0	0	0	0	0	42	346	0	0	0	0	34	0	0	0	12	0	0	0	0	0	0	0	0	0	0	0	0	0	0	0	0	0	0	0	0	0	0	0	0	0
ASV652	Metazoa	Arthropoda	Insecta	Hymenoptera	Apidae	Apis	Apis dorsata	0	0	0	8	0	0	0	0	0	0	0	0	0	0	0	0	0	0	0	0	0	403	67	0	0	0	0	0	0	0	0	0	0	0	0	0	0	0	0	0	0	0
ASV653	Stramenopila	Heterokontophyta	Oomycetes	Pythiales	Pythiaceae	Pythium	Pythium sp. C73	0	0	0	0	0	0	0	0	0	445	0	0	0	0	0	0	0	0	0	0	0	0	0	33	0	0	0	0	0	0	0	0	0	0	0	0	0	0	0	0	0	0
ASV654	Stramenopila	Heterokontophyta	Oomycetes	Saprolegniales	Saprolegniaceae	Phragmosporangium	Phragmosporangium uniseriatum	0	0	0	0	0	0	0	0	0	0	0	0	0	0	0	0	0	0	0	0	0	0	0	0	0	0	0	0	0	0	0	19	459	0	0	0	0	0	0	0	0	0
ASV655	Stramenopila	Heterokontophyta	Oomycetes	Pythiales	Pythiaceae	Pythium	Pythium pleroticum	0	0	0	0	0	0	0	0	477	0	0	0	0	0	0	0	0	0	0	0	0	0	0	0	0	0	0	0	0	0	0	0	0	0	0	0	0	0	0	0	0	0
ASV656	Stramenopila	Heterokontophyta	Oomycetes	Pythiales	Pythiaceae	Pythium	Pythium radiosum	0	0	0	0	0	0	0	0	0	0	0	0	0	0	0	0	0	0	0	0	0	0	0	0	0	0	0	0	0	0	0	94	0	0	0	0	0	0	0	0	0	0
ASV657	Fungi	'uncultured fungus'	'uncultured fungus'	'uncultured fungus'	'uncultured fungus'	'uncultured fungus'	uncultured fungus	0	0	0	0	0	0	0	0	0	0	0	0	0	0	0	0	0	0	0	0	0	0	0	0	0	0	0	0	0	0	0	0	0	0	0	0	0	0	0	0	0	0
ASV658	Stramenopila	Heterokontophyta	Oomycetes	Pythiales	Pythiaceae	Pythium	Pythium volutum	153	0	0	0	0	13	0	0	0	109	0	0	0	0	0	0	0	0	0	0	0	0	0	0	0	0	0	0	0	0	0	0	0	0	0	0	0	0	0	0	0	0
ASV660	Stramenopila	Heterokontophyta	Oomycetes	Peronosporales	Peronosporaceae	Phytophthora	Phytophthora austrocedrae	0	0	0	0	0	0	0	0	0	0	0	0	0	0	0	0	0	0	0	0	0	0	0	0	0	0	0	0	0	0	0	0	0	0	0	0	0	0	0	0	0	0
ASV661	Fungi	'uncultured fungus'	'uncultured fungus'	'uncultured fungus'	'uncultured fungus'	'uncultured fungus'	uncultured fungus	0	0	0	0	0	0	0	0	0	0	0	0	0	0	0	0	0	0	0	0	0	0	0	0	0	0	471	0	0	0	0	0	0	0	0	0	0	0	0	0	0	0
ASV662	Metazoa	Chordata	Actinopteri	Kurtiformes	Apogonidae	Sphaeramia	Sphaeramia orbicularis	0	0	0	18	0	0	0	0	0	0	8	6	0	0	0	0	11	0	0	0	0	0	0	0	0	0	0	0	0	0	0	0	0	0	0	133	71	0	0	0	0	0
ASV663	Stramenopila	Heterokontophyta	Oomycetes	Pythiales	Pythiaceae	Pythium	Pythium vanterpoolii	0	98	0	0	0	0	0	0	0	0	0	0	0	0	0	0	0	0	0	0	0	0	0	0	0	0	0	38	0	0	38	0	0	0	0	0	0	0	0	0	0	0
ASV664	Stramenopila	Heterokontophyta	Oomycetes	Saprolegniales	Saprolegniaceae	Aphanomyces	Aphanomyces sp. APH2	0	0	0	0	0	0	0	0	0	0	0	0	0	190	0	0	0	0	0	0	0	0	0	0	0	148	0	0	0	0	0	0	0	0	0	0	0	0	0	0	130	0
ASV665	Stramenopila	Heterokontophyta	Oomycetes	Pythiales	Pythiaceae	Pythium	Pythium polymastum	0	401	0	0	0	0	0	0	0	0	0	0	0	0	0	0	0	0	0	0	0	0	0	0	0	0	0	0	0	0	0	0	0	0	0	0	0	0	0	0	0	0
ASV666	Fungi	'uncultured fungus'	'uncultured fungus'	'uncultured fungus'	'uncultured fungus'	'uncultured fungus'	uncultured fungus	0	0	0	0	0	0	0	0	0	0	0	0	0	0	0	0	0	0	0	0	0	0	0	0	0	0	0	0	0	0	0	0	0	0	0	0	0	0	0	0	0	0
ASV667	Fungi	'uncultured fungus'	'uncultured fungus'	'uncultured fungus'	'uncultured fungus'	'uncultured fungus'	uncultured fungus	0	0	0	0	0	0	0	0	0	0	0	0	0	0	0	0	0	0	0	0	0	0	0	0	0	0	0	0	0	0	0	0	0	0	0	0	0	0	110	0	0	0
ASV668	Stramenopila	Heterokontophyta	Oomycetes	Pythiales	Pythiaceae	Pythium	Pythium helicandrum	0	0	0	0	0	0	0	0	0	0	0	0	0	0	0	0	0	0	0	0	0	0	0	0	0	0	0	0	0	0	0	142	0	0	0	0	0	0	0	0	0	0
ASV669	Stramenopila	Heterokontophyta	Oomycetes	Lagenidiales	Lagenidiaceae	Lagenidium	Lagenidium deciduum	0	0	0	0	0	0	0	0	0	0	0	0	0	0	0	0	0	0	0	0	0	0	0	0	0	0	0	0	0	0	0	0	0	0	0	0	0	0	0	0	0	0
ASV670	Stramenopila	Heterokontophyta	Oomycetes	Pythiales	Pythiaceae	Pythium	Pythium anandrum	0	34	0	0	0	0	0	0	0	63	0	0	0	0	0	0	0	0	0	0	0	0	0	0	0	0	0	0	0	0	0	0	16	0	0	0	0	0	0	36	0	0
ASV671	Stramenopila	Heterokontophyta	Oomycetes	Pythiales	Pythiaceae	Pythium	Pythium sp. C73	0	0	0	0	0	0	0	0	405	0	0	0	0	0	0	0	0	0	0	0	0	0	0	0	0	0	0	0	0	0	0	0	0	0	0	0	0	0	0	0	0	0
ASV672			Chrysophyceae	Chromulinales	Chromulinaceae	'Spumella-like'	Spumella-like flagellate 1006	0	0	0	0	0	0	0	0	406	0	0	0	0	0	0	0	0	0	0	0	32	0	0	0	0	0	0	0	0	0	0	0	0	0	0	0	0	0	0	0	0	0
ASV673	Fungi	'uncultured fungus'	'uncultured fungus'	'uncultured fungus'	'uncultured fungus'	'uncultured fungus'	uncultured fungus	0	0	0	0	0	0	0	0	0	0	0	0	0	0	0	0	0	0	0	0	0	0	0	0	0	0	0	0	0	0	0	0	0	0	0	0	0	0	120	0	0	0
ASV674	Stramenopila	Heterokontophyta	Oomycetes	Pythiales	Pythiaceae	Pythium	Pythium heterothallicum	0	0	0	0	0	0	0	0	0	0	0	0	0	0	0	0	0	0	0	0	0	0	0	0	0	0	0	0	0	0	0	0	0	0	0	0	0	0	0	0	0	0
ASV676	Stramenopila	Heterokontophyta	Oomycetes	Saprolegniales	Saprolegniaceae	Aphanomyces	Aphanomyces stellatus	0	0	0	0	0	0	0	0	0	0	0	268	0	0	0	0	0	0	0	0	0	0	0	0	0	0	0	0	0	0	0	0	0	0	0	0	0	0	0	0	0	0
ASV677	Stramenopila	Heterokontophyta	Oomycetes	Pythiales	Pythiaceae	Globisporangium	Globisporangium intermedium	0	0	0	0	0	0	288	0	0	0	0	0	0	0	0	0	0	0	0	0	0	0	0	25	54	0	0	0	0	0	0	0	0	0	0	0	0	0	0	0	0	0
ASV678	Fungi	'uncultured fungus'	'uncultured fungus'	'uncultured fungus'	'uncultured fungus'	'uncultured fungus'	uncultured fungus	0	0	0	0	0	0	0	0	0	0	0	0	40	0	0	0	0	0	0	21	0	0	0	0	0	0	0	0	0	0	0	0	307	0	0	0	0	0	0	0	0	0
ASV679	Stramenopila	Heterokontophyta	Oomycetes	Pythiales	Pythiaceae	Pythium	Pythium sylvaticum	0	0	0	0	0	0	0	0	0	0	0	0	0	0	0	0	0	0	0	0	28	0	0	0	0	0	0	0	0	0	0	0	0	77	0	0	0	0	0	0	0	0
ASV680		Ciliophora	Oligohymenophorea	Hymenostomatida	Tetrahymenidae	Tetrahymena	Tetrahymena thermophila	0	0	0	0	0	0	0	0	0	0	0	0	0	0	0	0	0	0	0	0	0	44	277	0	0	0	0	0	0	0	0	0	0	0	0	0	0	0	0	0	0	0
ASV681	Stramenopila	Heterokontophyta	Oomycetes			Haptoglossa	Haptoglossa zoospora	0	0	0	0	0	0	0	0	0	0	0	0	0	0	0	0	0	0	0	0	0	0	0	0	0	0	0	0	0	0	0	0	0	0	0	0	0	0	0	0	0	207
ASV682	Stramenopila	Heterokontophyta	Oomycetes	Saprolegniales	Saprolegniaceae	Aphanomyces	Aphanomyces stellatus	0	0	0	0	0	0	0	0	0	0	0	0	0	0	0	0	0	0	0	0	0	0	0	0	0	0	0	0	0	0	0	0	0	0	0	0	0	0	0	0	0	0
ASV683			Chrysophyceae	Chromulinales	Chromulinaceae	Pedospumella	Pedospumella sp. JBM19	0	0	0	0	0	0	0	0	0	0	0	0	0	0	0	0	0	0	0	0	0	0	0	0	0	0	0	0	0	0	0	0	0	0	0	0	0	0	0	0	0	0
ASV684	Stramenopila	Heterokontophyta	Oomycetes			Haptoglossa	Haptoglossa zoospora	0	0	0	0	0	0	0	0	0	0	0	0	0	0	0	0	0	0	0	0	34	0	0	0	0	0	0	0	0	0	0	119	0	0	0	0	0	0	0	0	0	0
ASV685	Viridiplantae	Streptophyta	Magnoliopsida	Fabales	Fabaceae	Vigna	Vigna unguiculata	0	0	0	0	0	0	0	0	0	0	0	0	0	0	0	0	0	0	0	0	0	0	0	0	0	0	0	0	0	0	0	249	0	0	0	0	0	0	0	0	0	0
ASV686	Stramenopila	Heterokontophyta	Oomycetes	Pythiales	Pythiaceae	Pythium	Pythium camurandrum	0	0	0	0	15	0	226	112	0	0	0	0	0	0	0	0	0	0	0	0	0	0	0	0	0	0	0	0	0	0	0	0	0	0	0	0	0	0	0	0	0	0
ASV687			Chrysophyceae	Chromulinales	Chromulinaceae	Spumella	Spumella sp.	0	0	0	0	0	0	0	0	0	0	0	0	0	0	0	0	0	0	0	0	0	0	0	0	0	0	0	0	0	0	0	0	0	0	0	23	0	58	0	0	0	0
ASV688			Chrysophyceae	Chromulinales	Chromulinaceae	Pedospumella	Pedospumella sp.	0	47	0	0	0	0	0	0	0	0	0	0	0	198	0	0	0	0	0	0	0	0	0	0	0	0	32	0	0	0	0	0	0	0	0	0	0	0	0	0	0	0
ASV689	Fungi	'uncultured fungus'	'uncultured fungus'	'uncultured fungus'	'uncultured fungus'	'uncultured fungus'	uncultured fungus	0	0	0	0	0	0	0	0	0	0	0	0	0	0	0	0	0	0	0	0	0	0	0	0	0	0	0	0	0	0	0	0	0	0	0	0	0	0	0	0	0	0
ASV690	Fungi	'uncultured fungus'	'uncultured fungus'	'uncultured fungus'	'uncultured fungus'	'uncultured fungus'	uncultured fungus	0	0	0	0	0	0	0	0	0	0	0	0	0	0	0	0	0	0	0	0	33	0	0	0	0	0	0	0	0	0	0	0	0	0	0	0	0	0	0	0	0	0
ASV691	Stramenopila	Heterokontophyta	Oomycetes	Peronosporales	Peronosporaceae	Phytophthora	Phytophthora ramorum	0	0	0	0	0	0	0	10	0	0	0	0	0	0	0	0	0	0	0	0	0	0	0	0	0	0	0	0	0	0	0	135	0	0	0	0	0	0	0	0	0	0
ASV692	Fungi	'uncultured fungus'	'uncultured fungus'	'uncultured fungus'	'uncultured fungus'	'uncultured fungus'	uncultured fungus	0	0	0	0	0	0	0	0	0	0	0	0	0	0	0	0	0	0	0	0	0	158	0	0	0	0	0	0	0	0	0	0	0	0	0	0	0	0	0	0	0	0
ASV693			Chrysophyceae	Chromulinales	Chromulinaceae	'Spumella-like'	Spumella-like flagellate 1031	0	0	0	0	0	0	0	5	28	0	0	0	0	0	0	0	0	0	0	0	0	0	0	0	0	0	0	0	48	0	0	0	132	0	0	0	0	34	0	0	0	67
ASV694			Chrysophyceae			'Spumella-like'	Spumella-like flagellate JBC/S24	0	0	0	0	0	0	0	0	0	0	0	0	0	0	0	0	0	0	0	0	0	0	0	0	0	0	0	0	0	0	0	0	0	0	0	0	0	0	0	0	0	0
ASV695	Stramenopila	Heterokontophyta	Oomycetes	Pythiales	Pythiaceae	Pythium	Pythium vanterpoolii	0	0	0	0	0	0	0	0	0	0	0	0	0	0	0	0	0	0	0	0	0	0	0	0	0	0	0	0	0	0	53	0	0	0	0	0	0	0	0	0	0	0
ASV696	Metazoa	Cnidaria	Anthozoa	Scleractinia	Pocilloporidae	Stylophora	Stylophora pistillata	0	0	0	0	0	0	0	0	0	0	0	0	0	0	10	205	0	0	0	0	0	0	0	0	0	0	0	0	0	0	0	0	0	0	0	227	0	0	0	0	0	0
ASV697	Stramenopila	Heterokontophyta	Oomycetes	Pythiales	Pythiaceae	Pythium	Pythium sylvaticum	0	0	0	0	0	0	0	0	0	0	0	0	0	0	0	0	0	0	0	0	0	0	0	0	0	0	0	0	0	0	0	0	0	0	0	0	0	0	0	0	0	0
ASV698	Stramenopila	Heterokontophyta	Oomycetes	Peronosporales	Peronosporaceae	Phytophthora	Phytophthora cambivora	0	0	182	259	0	0	0	0	0	0	0	0	0	0	0	0	0	0	0	0	0	0	0	0	0	0	0	0	0	0	0	0	0	0	0	0	0	0	0	0	0	0
ASV699	Metazoa	Chordata	Actinopteri	Kurtiformes	Apogonidae	Sphaeramia	Sphaeramia orbicularis	0	0	0	0	0	0	0	0	0	0	0	0	0	0	0	0	0	0	0	0	0	0	0	0	0	0	0	0	0	0	0	0	0	0	0	0	0	0	0	0	0	0
ASV700		Bacteroidetes	Flavobacteriia	Flavobacteriales	Flavobacteriaceae	Flavobacterium	Flavobacterium johnsoniae	0	0	0	0	0	0	0	0	0	0	0	0	0	0	0	0	52	0	0	0	0	0	0	0	0	0	0	0	0	0	0	0	0	0	0	0	0	0	0	0	0	0
ASV701	Stramenopila	Heterokontophyta	Oomycetes	Leptomitales		Apodachlya	Apodachlya brachynema	0	0	0	0	0	0	0	0	0	0	0	0	0	0	0	0	0	0	0	0	0	0	0	0	0	0	0	0	0	0	0	0	0	0	0	0	0	0	0	0	0	0
ASV702			Chrysophyceae	Chromulinales	Chromulinaceae	Spumella	Spumella sp.	0	0	0	0	0	0	0	0	0	0	0	0	0	0	0	0	0	0	0	0	0	71	0	0	0	0	0	0	31	0	0	0	14	0	0	0	0	0	0	0	0	0
ASV703	Stramenopila	Heterokontophyta	Oomycetes	Pythiales	Pythiaceae	Pythium	Pythium pleroticum	0	0	0	0	0	0	0	0	0	0	0	0	0	0	0	0	0	0	0	0	0	0	0	0	0	0	0	0	0	0	0	0	0	0	0	0	0	0	0	0	0	0
ASV704	Stramenopila	Heterokontophyta	Oomycetes	Pythiales	Pythiaceae	Pythium	Pythium apiculatum	0	0	0	0	0	0	0	0	0	0	0	0	0	0	0	0	0	0	0	0	96	0	0	0	0	0	0	0	0	0	0	0	0	0	0	0	0	0	0	0	0	0
ASV705	Stramenopila	Heterokontophyta	Oomycetes	Pythiales	Pythiaceae	Pythium	Pythium arrhenomanes	146	0	0	0	0	0	0	0	0	0	0	0	0	0	0	0	0	0	0	0	0	0	0	0	0	0	0	0	0	0	0	0	0	0	0	0	0	0	0	0	0	0
ASV706			Chrysophyceae	Chromulinales	Chromulinaceae	'Spumella-like'	Spumella-like flagellate 391f	0	0	0	0	0	0	0	0	0	0	0	0	0	0	0	0	0	0	0	0	0	0	49	0	0	0	0	0	0	0	0	0	0	0	0	0	0	0	0	0	0	0
ASV707			Chrysophyceae	Chromulinales	Chromulinaceae	Spumella	Spumella sp.	0	0	0	0	0	0	0	18	0	0	223	0	0	0	0	0	0	0	0	0	0	0	0	0	0	0	0	0	22	0	0	0	0	0	0	0	0	0	0	0	0	118
ASV708		'uncultured eukaryote'	'uncultured eukaryote'	'uncultured eukaryote'	'uncultured eukaryote'	'uncultured eukaryote'	uncultured eukaryote	0	0	0	0	0	0	0	0	0	0	0	0	0	0	0	0	0	0	0	0	0	0	0	0	0	0	0	0	0	0	0	0	0	0	0	0	0	0	0	0	0	0
ASV709	Metazoa	Arthropoda	Hexanauplia	Siphonostomatoida	Caligidae	Caligus	Caligus rogercresseyi	0	0	0	0	0	0	0	0	0	0	0	0	0	0	0	0	0	0	0	0	0	0	0	0	0	0	0	0	0	0	0	0	0	0	0	0	0	0	0	0	0	0
ASV710			Chrysophyceae	Chromulinales	Chromulinaceae	'Spumella-like'	Spumella-like flagellate 194f	0	0	0	0	0	0	0	0	0	0	0	0	0	52	0	0	0	0	0	0	0	0	0	0	0	0	0	0	0	0	0	0	0	0	0	0	0	0	0	0	0	0
ASV711			Chrysophyceae	Chromulinales	Chromulinaceae	'Spumella-like'	Spumella-like flagellate 391f	0	7	0	0	0	0	0	17	69	0	0	0	0	50	0	0	0	0	0	0	0	0	0	0	0	10	0	0	0	0	0	0	0	0	0	0	44	0	0	0	0	13
ASV712	Stramenopila	Heterokontophyta	Oomycetes	Pythiales	Pythiaceae	Pythium	Pythium attrantheridium	0	0	0	0	0	0	0	0	0	183	0	0	0	0	0	0	0	0	0	0	0	0	0	0	0	0	154	0	0	0	0	0	0	0	0	0	0	0	0	0	0	0
ASV713	Stramenopila	Heterokontophyta	Oomycetes	Peronosporales	Peronosporaceae	Phytophthora	Phytophthora citrophthora	0	0	0	0	0	0	0	0	0	0	0	0	0	0	0	0	0	0	427	0	0	0	0	0	0	0	0	0	0	0	0	0	0	0	0	0	0	0	0	0	0	0
ASV714	Stramenopila	Heterokontophyta	Oomycetes	Pythiales	Pythiogetonaceae	Pythiogeton	Pythiogeton zizaniae	0	0	0	0	0	248	0	0	0	0	0	0	0	0	0	0	0	0	0	0	0	0	0	0	121	0	0	0	0	0	0	0	0	0	0	0	0	0	0	0	0	0
ASV715	Stramenopila	Heterokontophyta	Oomycetes	Lagenidiales	Haliphthoraceae	Atkinsiella	Atkinsiella dubia	0	0	0	0	0	0	0	0	0	0	0	0	0	0	0	0	0	0	0	0	0	0	0	0	0	0	0	0	0	0	0	0	0	0	0	0	0	0	0	0	0	0
ASV716			Chrysophyceae			'Spumella-like'	Spumella-like flagellate JBC/S24	0	0	0	0	0	0	0	0	0	105	0	0	0	0	0	0	0	0	0	38	0	0	0	0	29	0	0	0	0	0	0	0	0	0	0	0	0	24	0	66	0	0
ASV717	Stramenopila	Heterokontophyta	Oomycetes	Pythiales	Pythiaceae	Phytopythium	Phytopythium citrinum	0	0	0	0	0	0	0	0	0	0	0	0	0	0	0	0	0	0	0	0	0	0	0	0	0	0	0	0	0	0	0	0	0	0	0	0	0	0	0	0	0	0
ASV718	Fungi	'uncultured fungus'	'uncultured fungus'	'uncultured fungus'	'uncultured fungus'	'uncultured fungus'	uncultured fungus	0	0	0	0	0	0	0	0	0	0	0	0	0	0	0	0	0	0	0	0	0	0	0	0	0	0	0	0	0	0	0	0	41	0	0	0	0	0	0	0	0	256
ASV719	Metazoa	Chordata	Actinopteri	Tetraodontiformes	Tetraodontidae	Tetraodon	Tetraodon nigroviridis	0	0	0	0	0	0	0	0	0	0	0	0	0	0	0	0	0	0	0	0	0	0	0	0	0	0	0	0	0	0	0	0	42	0	0	0	0	0	0	0	0	0
ASV720			Chrysophyceae	Chromulinales	Chromulinaceae	'Spumella-like'	Spumella-like flagellate Got220	0	0	119	23	0	0	0	0	0	0	0	0	0	0	0	0	0	0	0	0	0	0	0	0	0	0	0	0	0	0	0	0	0	0	0	0	278	0	0	0	0	0
ASV721			Dinophyceae	Prorocentrales	Prorocentraceae	Prorocentrum	Prorocentrum micans	0	0	0	0	0	0	0	0	0	0	0	0	0	0	0	0	0	0	0	0	0	0	0	0	0	0	0	0	0	0	0	0	0	0	0	0	0	0	0	0	0	0
ASV722			Chrysophyceae	Chromulinales	Chromulinaceae	'Spumella-like'	Spumella-like flagellate 391f	0	0	0	0	0	0	0	0	0	0	0	0	0	0	0	0	0	0	0	0	0	66	0	0	0	0	40	0	0	0	0	0	0	0	0	139	87	0	0	0	0	0
ASV723	Fungi	'uncultured fungus'	'uncultured fungus'	'uncultured fungus'	'uncultured fungus'	'uncultured fungus'	uncultured fungus	0	0	0	0	0	0	0	0	0	0	0	0	0	0	0	0	0	0	0	0	0	0	0	0	0	0	0	0	0	0	0	0	0	0	32	0	0	0	0	0	0	0
ASV724			Chrysophyceae	Chromulinales	Chromulinaceae	Spumella	Spumella sp.	0	0	0	0	0	0	0	0	0	0	0	0	0	0	0	0	0	0	0	0	0	0	0	0	0	0	0	0	0	0	0	0	0	0	6	0	0	0	24	0	0	15
ASV725	Fungi	'uncultured fungus'	'uncultured fungus'	'uncultured fungus'	'uncultured fungus'	'uncultured fungus'	uncultured fungus	0	0	0	0	0	0	0	13	0	0	0	0	0	0	0	0	0	0	0	0	0	0	0	0	0	0	0	0	0	0	0	0	97	0	0	0	0	0	0	49	0	0
ASV726	Stramenopila	Heterokontophyta	Oomycetes	Myzocytiopsidales	Myzocytiopsidaceae	Myzocytiopsis	Myzocytiopsis vermicola	0	0	0	0	0	0	0	0	0	0	0	0	0	0	0	0	0	0	0	0	0	0	0	0	0	0	0	0	0	0	0	224	0	0	0	0	0	0	0	0	0	0
ASV727			Chrysophyceae	Chromulinales	Chromulinaceae	'Spumella-like'	Spumella-like flagellate 194f	0	0	0	0	0	0	0	0	0	0	0	0	0	0	0	0	0	0	0	0	0	0	0	0	0	0	0	0	0	0	0	0	0	0	0	0	0	0	0	0	0	0
ASV728	Stramenopila	Heterokontophyta	Oomycetes	Pythiales	Pythiogetonaceae	Pythiogeton	Pythiogeton uniforme	0	0	25	0	0	0	0	0	0	0	0	0	0	0	0	0	0	0	0	0	0	0	0	0	0	0	0	0	0	0	0	0	0	0	0	51	127	0	0	0	0	0
ASV729	Stramenopila	Heterokontophyta	Oomycetes	Pythiales	Pythiaceae	Pythium	Pythium sp. unique2	0	0	0	0	0	0	0	0	0	0	0	0	0	0	251	159	0	0	0	0	0	0	0	0	0	0	0	0	0	0	0	0	0	0	0	0	0	0	0	0	0	0
ASV730	Fungi	'uncultured fungus'	'uncultured fungus'	'uncultured fungus'	'uncultured fungus'	'uncultured fungus'	uncultured fungus	0	0	0	0	0	0	0	0	0	0	0	0	0	0	0	0	0	0	0	0	0	0	0	0	0	0	0	0	0	0	0	0	0	0	0	0	0	41	0	0	0	0
ASV731	Stramenopila	Heterokontophyta	Oomycetes	Pythiales	Pythiaceae	Pythium	Pythium monospermum	0	0	0	0	0	0	0	0	0	0	0	0	0	0	0	0	0	0	0	0	0	0	0	0	0	0	0	0	0	0	0	0	0	0	0	0	0	0	0	0	0	0
ASV732			Chrysophyceae			'Spumella-like'	Spumella-like flagellate JBC/S24	0	0	0	0	0	0	0	0	0	0	0	15	28	0	0	0	0	0	0	0	0	0	0	0	40	0	0	0	0	0	0	0	0	0	0	0	0	0	0	0	0	13
ASV733	Stramenopila	Heterokontophyta	Oomycetes	Pythiales	Pythiaceae	Pythium	Pythium cf. deliense D2.5S2P21-2	0	0	10	48	0	0	0	0	0	0	0	0	0	0	119	184	48	0	0	0	0	0	0	0	0	0	0	0	0	0	0	0	0	0	0	0	0	0	0	0	0	0
ASV734	Stramenopila	Heterokontophyta	Oomycetes			Haptoglossa	Haptoglossa zoospora	0	0	0	0	0	0	0	0	0	0	0	0	0	0	14	395	0	0	0	0	0	0	0	0	0	0	0	0	0	0	0	0	0	0	0	0	0	0	0	0	0	0
ASV735	Stramenopila	Heterokontophyta	Oomycetes	Pythiales	Pythiaceae	Pythium	Pythium sylvaticum	0	0	0	0	0	0	0	0	0	0	0	0	0	0	0	0	0	0	0	0	0	0	0	0	0	0	0	0	0	243	0	0	0	0	0	0	0	0	0	0	0	0
ASV736	Fungi	'uncultured fungus'	'uncultured fungus'	'uncultured fungus'	'uncultured fungus'	'uncultured fungus'	uncultured fungus	0	0	0	0	32	0	0	0	0	0	0	0	0	0	0	0	0	0	0	0	0	0	0	0	0	0	0	0	0	0	0	0	0	0	0	0	0	0	0	0	0	0
ASV737			Dinophyceae	Prorocentrales	Prorocentraceae	Prorocentrum	Prorocentrum micans	0	0	0	0	0	0	0	0	251	43	0	0	0	0	0	0	0	0	0	0	0	0	0	0	0	0	0	0	0	0	0	0	0	0	0	0	0	0	0	0	0	0
ASV738			Chrysophyceae	Chromulinales	Chromulinaceae	Pedospumella	Pedospumella sp. JBM19	0	0	0	0	0	0	0	0	0	0	0	0	0	0	0	0	0	0	0	0	0	0	0	0	0	0	0	0	0	0	0	0	0	0	0	0	0	0	0	0	0	0
ASV739	Fungi	'uncultured fungus'	'uncultured fungus'	'uncultured fungus'	'uncultured fungus'	'uncultured fungus'	uncultured fungus	0	0	0	0	0	0	0	0	0	0	0	0	0	0	0	0	0	0	0	0	0	0	0	0	0	0	0	0	405	0	0	0	0	0	0	0	0	0	0	0	0	0
ASV740	Stramenopila	Heterokontophyta	Oomycetes	Saprolegniales	Saprolegniaceae	Saprolegnia	Saprolegnia delica	0	60	0	0	9	0	0	0	106	62	0	0	0	0	0	0	0	0	0	0	0	0	0	0	0	0	0	0	0	0	0	0	0	0	0	0	0	0	0	0	0	0
ASV741		Ciliophora	Oligohymenophorea	Hymenostomatida	Tetrahymenidae	Tetrahymena	Tetrahymena thermophila	0	0	0	0	0	0	0	0	0	0	0	0	0	0	0	0	0	0	0	0	0	32	208	0	0	0	0	0	0	0	0	0	0	0	0	0	0	0	0	0	0	0
ASV742	Stramenopila	Heterokontophyta	Oomycetes	Pythiales	Pythiaceae	Pythium	Pythium polymastum	0	0	0	0	0	0	0	0	0	0	0	0	0	0	0	0	0	0	0	0	0	0	0	0	400	0	0	0	0	0	0	0	0	0	0	0	0	0	0	0	0	0
ASV743	Metazoa	Chordata	Leptocardii	Amphioxiformes	Branchiostomidae	Branchiostoma	Branchiostoma floridae	0	0	0	0	0	0	0	0	0	0	0	0	0	0	0	0	0	0	0	0	0	0	0	0	140	0	0	0	0	0	0	0	0	0	0	0	0	0	0	0	0	0
ASV744			Chrysophyceae			Segregatospumella	Segregatospumella sp.	0	0	0	0	0	0	0	0	0	0	0	0	0	0	0	0	0	0	0	0	0	0	0	0	0	0	0	0	67	0	0	0	0	0	0	0	0	0	224	0	0	0
ASV745	Fungi	'uncultured fungus'	'uncultured fungus'	'uncultured fungus'	'uncultured fungus'	'uncultured fungus'	uncultured fungus	0	0	0	0	0	0	0	0	0	0	0	0	0	0	0	0	0	0	0	0	0	0	0	0	0	0	0	0	0	0	0	0	0	0	0	0	0	0	0	0	0	0
ASV746	Fungi	'uncultured fungus'	'uncultured fungus'	'uncultured fungus'	'uncultured fungus'	'uncultured fungus'	uncultured fungus	0	0	0	0	0	0	0	0	0	0	0	0	0	0	0	0	0	0	0	0	0	0	0	0	0	0	0	0	0	0	0	0	0	0	0	0	0	0	0	0	0	0
ASV747	Fungi	'uncultured fungus'	'uncultured fungus'	'uncultured fungus'	'uncultured fungus'	'uncultured fungus'	uncultured fungus	0	0	0	0	0	0	0	0	0	0	0	0	0	0	0	0	0	0	0	0	0	0	0	0	0	0	0	0	0	0	0	0	0	0	0	0	0	0	0	0	0	0
ASV748			Chrysophyceae	Chromulinales	Chromulinaceae	Pedospumella	Pedospumella sp. JBM19	0	0	0	0	0	0	0	0	0	0	0	0	0	0	0	0	0	0	0	0	0	0	35	0	0	0	0	0	0	0	0	0	0	0	0	0	0	0	0	0	0	0
ASV749	Stramenopila	Heterokontophyta	Oomycetes	Saprolegniales	Saprolegniaceae	Aphanomyces	Aphanomyces cladogamus	0	0	0	0	0	0	0	0	0	0	0	0	0	0	0	0	0	0	0	0	0	0	0	0	0	0	0	0	0	0	0	0	394	0	0	0	0	0	0	0	0	0
ASV750	Fungi	'uncultured fungus'	'uncultured fungus'	'uncultured fungus'	'uncultured fungus'	'uncultured fungus'	uncultured fungus	0	0	0	0	0	0	0	0	0	0	0	0	0	0	0	0	0	0	0	0	0	0	0	0	0	0	0	0	0	0	0	0	0	0	0	0	0	0	0	0	0	0
ASV751	Stramenopila	Heterokontophyta	Oomycetes	Saprolegniales	Saprolegniaceae	Saprolegnia	Saprolegnia terrestris	0	0	0	0	0	0	0	0	0	0	0	0	0	0	0	0	178	0	0	0	0	0	0	0	0	0	0	0	0	0	0	0	0	0	0	0	0	0	214	0	0	0
ASV752	Fungi	'uncultured fungus'	'uncultured fungus'	'uncultured fungus'	'uncultured fungus'	'uncultured fungus'	uncultured fungus	0	0	0	0	0	0	0	0	0	0	0	0	0	0	0	0	0	0	0	0	0	0	0	0	0	0	0	0	0	0	0	0	0	0	0	0	0	0	0	0	0	0
ASV753			Chrysophyceae	Chromulinales	Chromulinaceae	'Spumella-like'	Spumella-like flagellate 1006	0	0	0	0	0	0	0	0	0	0	0	0	0	0	0	0	0	0	0	0	0	0	0	0	0	0	0	0	0	0	0	0	0	0	0	0	0	0	0	0	0	0
ASV754	Stramenopila	Heterokontophyta	Oomycetes	Pythiales	Pythiaceae	Pythium	Pythium sp. unique1sub3	0	0	0	0	356	31	0	0	0	0	0	0	0	0	0	0	0	0	0	0	0	0	0	0	0	0	0	0	0	0	0	0	0	0	0	0	0	0	0	0	0	0
ASV755	Metazoa	Chordata	Actinopteri	Perciformes	Bovichtidae	Cottoperca	Cottoperca gobio	0	0	0	0	0	0	0	0	0	0	0	0	0	0	0	0	0	0	0	0	0	0	0	0	0	0	0	0	0	0	0	0	0	0	0	0	0	0	0	0	0	0
ASV756	Stramenopila	Heterokontophyta	Oomycetes	Peronosporales	Peronosporaceae	Hyaloperonospora	Hyaloperonospora erophilae	0	0	0	0	0	0	0	0	0	0	0	0	0	0	0	0	0	0	0	0	0	0	0	0	0	0	0	0	0	0	0	0	0	0	0	0	0	0	0	0	0	0
ASV757	Metazoa	Chordata	Actinopteri	Blenniiformes	Gobiesocidae	Gouania	Gouania willdenowi	0	0	58	32	0	0	0	0	0	0	0	0	0	0	54	242	0	0	0	0	0	0	0	0	0	0	0	0	0	0	0	0	0	0	0	0	0	0	0	0	0	0
ASV758	Stramenopila	Heterokontophyta	Oomycetes	Lagenidiales	Lagenidiaceae	Lagenidium	Lagenidium sp. SLG-2014b	0	0	0	0	0	0	0	0	0	0	0	0	0	0	0	0	0	0	0	0	0	0	0	0	0	0	0	0	0	0	0	0	0	0	0	0	0	0	0	0	0	0
ASV759			Chrysophyceae	Chromulinales	Chromulinaceae	Spumella	Spumella vulgaris	0	0	0	0	0	0	0	0	0	0	0	0	0	0	0	0	0	0	0	0	0	0	0	0	0	0	0	0	11	0	0	0	28	0	0	0	0	33	0	0	0	60
ASV760	Stramenopila	Heterokontophyta	Oomycetes	Saprolegniales	Saprolegniaceae	Saprolegnia	Saprolegnia delica	0	66	0	0	0	29	0	0	0	0	0	0	0	0	0	0	0	0	0	0	0	0	0	0	0	0	0	0	0	0	0	0	0	0	0	0	0	0	0	0	0	0
ASV761	Fungi	'uncultured fungus'	'uncultured fungus'	'uncultured fungus'	'uncultured fungus'	'uncultured fungus'	uncultured fungus	0	0	0	0	0	0	0	0	0	0	0	0	0	0	0	0	0	0	0	0	0	0	0	0	0	0	0	0	0	0	0	0	0	0	0	0	0	153	0	0	0	0
ASV762	Stramenopila	Heterokontophyta	Oomycetes	Pythiales	Pythiaceae	Pythium	Pythium kandovanense	0	0	0	0	0	0	0	0	0	0	0	0	0	0	0	0	0	0	0	0	0	0	0	0	0	0	0	0	0	0	0	0	0	0	0	0	0	0	0	0	0	0
ASV763	Metazoa	Chordata	Amphibia	Gymnophiona	Rhinatrematidae	Rhinatrema	Rhinatrema bivittatum	0	0	0	0	0	0	0	0	0	0	0	0	0	0	0	0	0	0	0	0	0	336	40	0	0	0	0	0	0	0	0	0	0	0	0	0	0	0	0	0	0	0
ASV764	Fungi	'uncultured fungus'	'uncultured fungus'	'uncultured fungus'	'uncultured fungus'	'uncultured fungus'	uncultured fungus	0	0	0	0	0	0	0	0	0	0	0	0	0	0	0	0	0	0	0	0	0	0	0	0	0	0	0	0	0	0	0	0	0	0	0	0	0	0	0	0	0	0
ASV765	Stramenopila	Heterokontophyta	Oomycetes	Peronosporales	Peronosporaceae	Peronospora	Peronospora ficariae	0	0	0	0	0	0	0	0	0	0	0	0	0	0	0	0	0	0	0	0	0	0	0	0	0	0	0	0	0	0	0	0	0	0	0	0	0	0	0	0	0	0
ASV766	Fungi	'uncultured fungus'	'uncultured fungus'	'uncultured fungus'	'uncultured fungus'	'uncultured fungus'	uncultured fungus	0	0	0	0	0	0	0	0	0	0	0	0	0	0	0	0	0	0	0	0	0	0	0	0	0	0	0	0	0	0	0	0	0	0	0	0	0	0	0	0	0	0
ASV767	Fungi	'uncultured fungus'	'uncultured fungus'	'uncultured fungus'	'uncultured fungus'	'uncultured fungus'	uncultured fungus	0	0	0	0	11	0	0	0	0	0	0	0	0	0	0	0	0	0	0	0	0	23	0	0	0	0	0	0	0	0	0	66	157	0	0	0	0	0	0	0	0	0
ASV768	Stramenopila	Heterokontophyta	Oomycetes	Leptomitales		Apodachlya	Apodachlya brachynema	0	0	0	0	0	0	0	0	0	0	0	0	0	0	0	0	0	0	0	0	0	0	0	0	0	0	0	0	0	0	0	0	0	0	0	0	0	0	0	0	0	0
ASV769	Fungi	'uncultured fungus'	'uncultured fungus'	'uncultured fungus'	'uncultured fungus'	'uncultured fungus'	uncultured fungus	0	0	0	0	0	0	0	147	0	0	0	0	0	0	0	0	0	0	0	0	0	0	0	0	0	0	0	0	0	0	0	0	0	0	0	0	0	0	0	0	0	0
ASV770	Stramenopila	Heterokontophyta	Oomycetes	Pythiales	Pythiaceae	Pythium	Pythium pachycaule	0	0	0	0	0	0	0	0	0	0	0	0	0	0	0	0	0	0	0	0	0	0	0	0	0	0	0	0	0	0	0	0	0	0	0	0	0	0	0	0	0	0
ASV771	Fungi	'uncultured fungus'	'uncultured fungus'	'uncultured fungus'	'uncultured fungus'	'uncultured fungus'	uncultured fungus	0	0	0	0	0	0	0	0	0	0	0	0	0	0	0	0	0	0	0	0	0	0	0	0	0	0	0	0	0	0	0	0	0	0	0	0	0	0	0	0	0	0
ASV772	Metazoa	Chordata	Actinopteri	Anabantiformes	Anabantidae	Anabas	Anabas testudineus	0	0	0	0	0	0	0	0	0	0	0	84	0	0	0	0	0	0	0	0	0	0	0	0	0	0	0	0	0	0	0	0	0	0	0	0	0	0	0	0	0	0
ASV773	Stramenopila	Heterokontophyta	Oomycetes	Pythiales	Pythiogetonaceae	Pythiogeton	Pythiogeton zizaniae	0	0	0	0	0	0	0	0	0	167	0	0	0	0	0	0	0	0	0	0	0	0	0	0	0	0	0	0	0	0	0	0	0	0	0	0	0	0	0	0	0	0
ASV774			Chrysophyceae			Segregatospumella	Segregatospumella sp.	0	0	0	0	0	0	0	0	0	0	0	0	0	0	0	0	0	0	0	0	0	0	0	0	0	0	0	0	0	0	0	0	0	0	0	0	223	0	0	0	0	0
ASV775	Fungi	'uncultured fungus'	'uncultured fungus'	'uncultured fungus'	'uncultured fungus'	'uncultured fungus'	uncultured fungus	0	0	0	0	0	0	0	0	4	0	0	0	0	0	0	0	0	0	0	0	0	0	0	0	0	140	0	0	0	0	0	0	0	0	0	0	0	0	0	0	0	6
ASV776	Stramenopila	Heterokontophyta	Oomycetes	Saprolegniales	Saprolegniaceae	Phragmosporangium	Phragmosporangium uniseriatum	70	0	0	0	0	0	0	0	0	0	0	0	0	0	0	0	0	0	0	0	0	0	0	0	265	0	0	0	0	0	0	0	0	0	0	0	0	0	0	0	0	0
ASV777			Chrysophyceae	Chromulinales	Chromulinaceae	Pedospumella	Pedospumella sp. JBM19	364	0	0	0	0	0	0	0	0	0	0	0	0	0	0	0	0	0	0	0	0	0	0	0	0	0	0	0	0	0	0	0	0	0	0	0	0	0	0	0	0	0
ASV778	Stramenopila	Heterokontophyta	Oomycetes	Saprolegniales	Saprolegniaceae	Achlya	Achlya bisexualis	0	0	0	0	0	0	0	0	0	0	0	0	0	364	0	0	0	0	0	0	0	0	0	0	0	0	0	0	0	0	0	0	0	0	0	0	0	0	0	0	0	0
ASV779	Fungi	'uncultured fungus'	'uncultured fungus'	'uncultured fungus'	'uncultured fungus'	'uncultured fungus'	uncultured fungus	0	0	0	0	0	0	0	0	0	0	0	0	0	0	0	0	0	0	0	0	0	0	0	0	0	0	0	0	0	0	0	0	0	0	0	0	0	0	0	0	0	0
ASV780	Fungi	'uncultured fungus'	'uncultured fungus'	'uncultured fungus'	'uncultured fungus'	'uncultured fungus'	uncultured fungus	0	0	0	0	0	0	0	0	0	0	0	0	0	117	0	0	0	0	0	0	0	0	0	0	0	246	0	0	0	0	0	0	0	0	0	0	0	0	0	0	0	0
ASV781	Stramenopila	Heterokontophyta	Oomycetes	Pythiales	Pythiaceae	Pythium	Pythium sp. B65	0	0	0	0	0	0	0	0	0	0	0	0	0	0	0	0	0	0	0	0	0	0	0	0	0	0	0	0	0	0	0	0	362	0	0	0	0	0	0	0	0	0
ASV782	Fungi	'uncultured fungus'	'uncultured fungus'	'uncultured fungus'	'uncultured fungus'	'uncultured fungus'	uncultured fungus	0	0	0	0	0	0	0	0	0	0	0	0	0	0	0	0	0	0	0	0	0	0	0	0	0	0	0	0	0	0	0	0	0	0	0	0	0	0	0	0	0	0
ASV783	Stramenopila	Heterokontophyta	Oomycetes			Haptoglossa	Haptoglossa sp. SL20	0	0	237	41	0	0	0	0	0	0	0	0	0	0	6	77	0	0	0	0	0	0	0	0	0	0	0	0	0	0	0	0	0	0	0	0	0	0	0	0	0	0
ASV784	Stramenopila	Heterokontophyta	Oomycetes	Pythiales	Pythiaceae	Pythium	Pythium polymastum	124	0	0	0	0	0	0	0	0	0	0	0	172	0	0	0	0	0	0	0	0	0	0	0	0	0	0	0	0	0	0	0	0	0	0	0	0	0	0	0	0	0
ASV785	Stramenopila	Heterokontophyta	Oomycetes	Pythiales	Pythiaceae	Pythium	Pythium sp. M-2017a	0	0	0	0	0	0	0	0	0	0	0	0	0	0	0	0	0	0	0	0	0	0	0	0	0	0	0	0	0	0	0	0	0	0	0	0	0	0	0	0	0	0
ASV786	Fungi	'uncultured fungus'	'uncultured fungus'	'uncultured fungus'	'uncultured fungus'	'uncultured fungus'	uncultured fungus	0	0	0	46	0	0	0	0	0	0	0	0	0	0	0	0	0	0	0	0	0	0	0	0	0	0	0	0	0	0	0	0	0	0	0	0	0	0	0	0	0	0
ASV787			Chrysophyceae	Chromulinales	Chromulinaceae	Spumella	Spumella vulgaris	0	0	0	0	0	0	0	0	0	0	0	0	0	0	0	0	0	0	0	0	0	0	0	0	0	0	0	0	0	0	0	0	0	0	0	0	0	0	0	0	0	0
ASV788	Stramenopila	Heterokontophyta	Oomycetes	Peronosporales	Peronosporaceae	Phytophthora	Phytophthora pseudosyringae	0	63	0	0	0	0	0	0	0	0	0	0	0	0	0	0	0	0	0	0	0	0	0	0	0	0	0	0	0	0	0	0	0	0	0	0	0	0	0	0	0	0
ASV789	Stramenopila	Heterokontophyta	Oomycetes	Pythiales	Pythiaceae	Pythium	Pythium oligandrum	0	0	0	0	0	0	0	0	0	0	0	0	0	0	0	0	0	0	0	0	0	0	0	0	0	0	0	0	0	0	0	0	0	0	0	0	0	0	0	0	0	0
ASV790	Viridiplantae	Streptophyta	Magnoliopsida	Cucurbitales	Cucurbitaceae	Cucumis	Cucumis melo	0	0	0	0	0	0	0	0	0	0	354	0	0	0	0	0	0	0	0	0	0	0	0	0	0	0	0	0	0	0	0	0	0	0	0	0	0	0	0	0	0	0
ASV791	Stramenopila	Heterokontophyta	Oomycetes	Pythiales	Pythiaceae	Phytopythium	Phytopythium sp.	0	0	0	0	0	0	0	0	0	0	0	0	0	0	123	0	230	0	0	0	0	0	0	0	0	0	0	0	0	0	0	0	0	0	0	0	0	0	0	0	0	0
ASV792	Fungi	'uncultured fungus'	'uncultured fungus'	'uncultured fungus'	'uncultured fungus'	'uncultured fungus'	uncultured fungus	0	0	0	0	0	0	0	0	0	0	0	0	0	0	0	0	0	0	0	0	0	0	0	0	0	0	0	0	0	0	0	0	0	0	0	308	0	0	0	0	0	0
ASV793			Chrysophyceae	Chromulinales	Chromulinaceae	'Spumella-like'	Spumella-like flagellate 1006	0	0	0	0	0	0	0	0	0	0	0	0	0	0	0	0	0	0	0	0	0	0	0	0	0	0	0	3	0	0	0	15	57	117	0	0	0	0	0	0	0	0
ASV794			Chrysophyceae	Chromulinales	Chromulinaceae	Pedospumella	Pedospumella sp. JBM19	0	0	0	0	0	0	0	0	0	0	0	0	0	0	0	0	0	0	0	0	0	0	0	0	0	0	0	0	0	0	0	0	0	0	0	0	317	0	0	0	0	0
ASV795			Chrysophyceae			Segregatospumella	Segregatospumella sp.	33	0	0	0	0	0	0	0	0	0	0	0	0	0	0	0	0	0	0	0	0	0	0	0	0	0	0	0	0	0	0	0	0	0	62	0	0	0	0	0	0	0
ASV796	Stramenopila	Heterokontophyta	Oomycetes	Pythiales	Pythiaceae	Pythium	Pythium sp.	0	0	0	0	0	0	0	266	0	0	0	0	0	0	0	0	0	0	0	0	0	0	0	0	0	0	0	0	0	0	0	0	0	0	0	0	0	0	0	0	0	0
ASV797	Stramenopila	Heterokontophyta	Oomycetes	Pythiales	Pythiaceae	Pythium	Pythium sp.	0	0	0	0	0	0	0	0	0	0	0	0	0	0	0	0	0	0	0	0	0	0	0	0	0	0	0	0	0	0	0	0	0	0	0	0	0	0	0	0	0	0
ASV798	Stramenopila	Heterokontophyta	Oomycetes	Pythiales	Pythiaceae	Pythium	Pythium helicandrum	0	0	0	0	0	0	0	349	0	0	0	0	0	0	0	0	0	0	0	0	0	0	0	0	0	0	0	0	0	0	0	0	0	0	0	0	0	0	0	0	0	0
ASV799		Bacillariophyta	Bacillariophyceae	Surirellales	Surirellaceae	Surirella	Surirella sp. CCAP 1071/2	0	0	0	0	0	0	0	0	0	349	0	0	0	0	0	0	0	0	0	0	0	0	0	0	0	0	0	0	0	0	0	0	0	0	0	0	0	0	0	0	0	0
ASV800	Stramenopila	Heterokontophyta	Oomycetes	Pythiales	Pythiaceae	Pythium	Pythium junctum	0	0	0	0	0	0	0	0	0	0	0	0	0	0	0	0	0	0	0	0	0	0	0	0	0	0	0	0	0	0	0	0	0	0	0	0	0	0	0	0	0	0
ASV801	Stramenopila	Heterokontophyta	Oomycetes	Leptomitales		Apodachlya	Apodachlya minima	0	0	0	0	0	0	0	0	0	0	0	0	0	0	0	0	0	0	0	0	0	0	0	0	0	0	0	0	0	0	0	0	0	0	0	0	0	0	0	0	0	0
ASV802	Stramenopila	Heterokontophyta	Oomycetes	Myzocytiopsidales	Myzocytiopsidaceae	Myzocytiopsis	Myzocytiopsis sp. venatrix	0	0	0	225	0	0	0	0	0	0	0	0	0	0	52	62	0	0	0	0	0	0	0	0	0	0	0	0	0	0	0	0	0	0	0	0	0	0	0	0	0	0
ASV803	Stramenopila	Heterokontophyta	Oomycetes	Pythiales	Pythiogetonaceae	Pythiogeton	Pythiogeton puliense	0	0	0	0	0	0	0	0	0	0	0	0	0	0	0	0	0	0	0	346	0	0	0	0	0	0	0	0	0	0	0	0	0	0	0	0	0	0	0	0	0	0
ASV804	Stramenopila	Heterokontophyta	Oomycetes	Pythiales	Pythiaceae	Pythium	Pythium sp. REB326-77	0	0	135	198	0	0	0	0	0	0	0	0	0	0	7	5	0	0	0	0	0	0	0	0	0	0	0	0	0	0	0	0	0	0	0	0	0	0	0	0	0	0
ASV805	Stramenopila	Heterokontophyta	Oomycetes	Leptomitales		Apodachlya	Apodachlya minima	0	0	0	0	0	0	0	0	0	0	0	0	0	0	0	0	46	0	0	0	0	0	0	0	0	0	0	0	0	297	0	0	0	0	0	0	0	0	0	0	0	0
ASV806	Stramenopila	Heterokontophyta	Oomycetes	Saprolegniales	Saprolegniaceae	Dictyuchus	Dictyuchus monosporus	0	0	0	0	0	0	0	0	0	0	0	0	0	0	0	0	0	0	0	0	0	0	0	0	9	0	0	0	0	0	0	0	0	0	0	0	0	0	0	0	0	0
ASV807	Stramenopila	Heterokontophyta	Oomycetes	Saprolegniales	Saprolegniaceae	Saprolegnia	Saprolegnia sp. SAP4	0	0	0	344	0	0	0	0	0	0	0	0	0	0	0	0	0	0	0	0	0	0	0	0	0	0	0	0	0	0	0	0	0	0	0	0	0	0	0	0	0	0
ASV808	Metazoa	Arthropoda	Insecta	Hymenoptera	Braconidae	Microplitis	Microplitis demolitor	0	0	10	10	0	0	0	0	0	0	0	0	0	0	0	15	0	0	0	0	0	146	160	0	0	0	0	0	0	0	0	0	0	0	0	0	0	0	0	0	0	0
ASV809	Viridiplantae	Streptophyta	Magnoliopsida	Zygophyllales	Krameriaceae	Krameria	Krameria bicolor	0	0	0	0	0	0	0	0	0	0	0	0	0	0	0	0	0	0	0	0	0	0	0	0	0	0	0	0	0	0	0	0	0	0	0	0	0	0	0	0	0	0
ASV810	Stramenopila	Heterokontophyta	Oomycetes	Pythiales	Pythiaceae	Pythium	Pythium attrantheridium	0	0	0	0	0	0	0	0	0	0	0	0	0	0	0	0	0	0	0	0	0	0	0	0	0	0	0	0	0	0	0	0	0	0	0	0	0	0	0	0	0	0
ASV811	Fungi	'uncultured fungus'	'uncultured fungus'	'uncultured fungus'	'uncultured fungus'	'uncultured fungus'	uncultured fungus	0	0	0	0	0	0	0	4	0	0	0	0	0	0	0	0	0	0	0	0	6	0	0	0	0	0	0	0	0	0	0	19	102	0	0	0	0	0	0	0	0	0
ASV812	Fungi	'uncultured fungus'	'uncultured fungus'	'uncultured fungus'	'uncultured fungus'	'uncultured fungus'	uncultured fungus	0	0	0	0	0	0	0	0	0	0	0	0	0	0	0	0	0	0	0	0	0	0	0	0	0	338	0	0	0	0	0	0	0	0	0	0	0	0	0	0	0	0
ASV813			Chrysophyceae	Chromulinales	Chromulinaceae	Spumella	Spumella vulgaris	0	0	0	0	0	0	0	0	0	0	0	0	0	0	0	0	0	0	0	0	0	0	0	0	0	0	0	0	0	0	0	0	0	0	0	161	114	0	0	0	0	0
ASV814	Fungi	'uncultured fungus'	'uncultured fungus'	'uncultured fungus'	'uncultured fungus'	'uncultured fungus'	uncultured fungus	0	0	0	0	0	0	0	0	0	0	0	0	0	0	0	0	0	0	0	0	0	0	0	0	0	0	0	0	0	0	0	0	0	0	0	0	0	0	0	0	0	0
ASV815	Fungi	'uncultured fungus'	'uncultured fungus'	'uncultured fungus'	'uncultured fungus'	'uncultured fungus'	uncultured fungus	0	0	0	0	0	0	0	0	0	0	0	0	0	0	0	0	0	0	0	0	0	14	0	0	0	0	0	0	0	0	0	0	0	0	0	0	0	0	0	0	0	0
ASV816			Chrysophyceae			Segregatospumella	Segregatospumella sp.	0	0	0	0	0	0	0	0	0	0	0	0	0	0	0	0	0	0	0	0	0	0	38	0	0	0	0	0	0	0	0	0	0	0	0	0	237	0	0	0	0	0
ASV817	Stramenopila	Heterokontophyta	Oomycetes	Peronosporales	Peronosporaceae	Phytophthora	Phytophthora pini	0	0	0	0	0	0	0	0	0	0	0	0	0	0	0	0	0	0	0	0	0	0	0	0	0	0	0	0	0	0	0	0	0	0	0	0	0	0	0	0	0	0
ASV818	Stramenopila	Heterokontophyta	Oomycetes	Pythiales	Pythiaceae	Pythium	Pythium sp. LY221g	0	0	0	336	0	0	0	0	0	0	0	0	0	0	0	0	0	0	0	0	0	0	0	0	0	0	0	0	0	0	0	0	0	0	0	0	0	0	0	0	0	0
ASV819		Ciliophora	Oligohymenophorea	Hymenostomatida	Tetrahymenidae	Tetrahymena	Tetrahymena thermophila	0	0	0	0	0	0	0	0	0	0	0	0	0	0	0	0	0	0	0	0	0	0	114	0	0	0	0	0	0	0	0	0	0	0	0	0	0	0	0	0	0	0
ASV820			Chrysophyceae	Chromulinales	Chromulinaceae	Pedospumella	Pedospumella sp.	0	0	0	0	0	0	0	0	0	0	0	0	0	0	0	0	0	0	0	0	0	0	0	0	0	0	0	0	0	0	0	0	0	0	0	0	0	0	146	0	0	0
ASV821	Stramenopila	Heterokontophyta	Oomycetes	Lagenidiales	Haliphthoraceae	Atkinsiella	Atkinsiella dubia	0	0	0	0	0	0	0	0	0	0	0	0	0	0	0	0	0	0	0	0	0	0	0	0	0	0	0	0	0	0	0	0	0	0	0	0	0	0	0	0	0	0
ASV822	Stramenopila	Heterokontophyta	Oomycetes	Pythiales	Pythiaceae	Pythium	Pythium alternatum	0	0	0	0	0	0	0	0	0	0	0	0	0	0	0	0	0	0	0	0	0	0	0	0	0	0	0	0	0	0	0	0	0	0	0	0	0	0	0	0	0	0
ASV823	Fungi	'uncultured fungus'	'uncultured fungus'	'uncultured fungus'	'uncultured fungus'	'uncultured fungus'	uncultured fungus	0	0	0	0	0	0	0	0	0	0	0	0	0	0	0	0	0	0	0	0	0	0	0	0	0	0	0	0	0	0	0	0	0	0	0	0	0	0	0	0	0	0
ASV824	Fungi	'uncultured fungus'	'uncultured fungus'	'uncultured fungus'	'uncultured fungus'	'uncultured fungus'	uncultured fungus	0	0	0	0	0	0	0	0	0	0	0	0	0	0	0	0	0	0	0	0	0	0	0	17	0	0	0	0	0	0	0	0	0	0	0	0	0	0	0	0	0	0
ASV825			Chrysophyceae	Chromulinales	Chromulinaceae	Pedospumella	Pedospumella encystans	0	0	0	0	0	0	0	0	0	0	0	0	0	0	0	0	0	0	0	0	0	0	0	0	0	0	0	0	0	0	0	0	0	0	0	0	0	0	0	0	0	0
ASV826			Chrysophyceae	Chromulinales	Chromulinaceae	'Spumella-like'	Spumella-like flagellate Got220	0	0	0	0	0	0	0	0	0	0	0	0	0	0	0	0	0	0	0	0	0	0	0	0	0	0	0	0	0	0	0	0	0	0	0	0	0	0	0	0	0	0
ASV827	Stramenopila	Heterokontophyta	Oomycetes	Peronosporales	Peronosporaceae	Hyaloperonospora	Hyaloperonospora cochleariae	0	0	0	0	0	0	0	0	0	0	0	0	0	0	0	0	0	0	0	0	0	0	0	0	0	0	0	0	0	0	0	0	0	0	0	0	0	0	0	0	0	0
ASV828		'uncultured eukaryote'	'uncultured eukaryote'	'uncultured eukaryote'	'uncultured eukaryote'	'uncultured eukaryote'	uncultured eukaryote	0	0	0	0	0	0	0	51	0	0	0	0	0	0	0	0	0	0	0	0	0	0	0	0	0	0	0	0	0	0	0	0	0	0	0	0	0	0	0	0	0	0
ASV829		Bacteroidetes	Flavobacteriia	Flavobacteriales	Blattabacteriaceae	Blattabacterium	Blattabacterium punctulatus	0	0	0	0	0	0	0	0	0	0	185	45	0	0	0	0	0	0	0	0	0	0	0	0	0	0	0	0	0	0	0	0	0	0	0	0	0	0	0	0	87	0
ASV830	Viridiplantae	Streptophyta	Magnoliopsida	Fabales	Fabaceae	Lupinus	Lupinus angustifolius	0	0	0	0	0	0	0	0	0	0	0	0	0	0	0	0	0	0	0	0	0	0	0	0	0	0	0	5	0	0	0	0	0	0	0	0	0	0	0	0	0	0
ASV831	Stramenopila	Heterokontophyta	Oomycetes	Pythiales	Pythiaceae	Globisporangium	Globisporangium oryzicola	0	0	0	0	0	0	0	0	0	0	0	0	0	0	0	0	0	0	0	0	0	0	0	0	0	0	0	0	0	0	0	0	0	0	0	0	0	0	0	0	0	0
ASV832			Chrysophyceae	Chromulinales	Chromulinaceae	Pedospumella	Pedospumella sp.	0	0	60	0	0	0	0	0	0	0	0	0	0	0	0	0	0	0	0	0	0	0	0	0	0	165	0	0	0	0	0	0	0	0	0	25	26	0	0	0	0	0
ASV833	Stramenopila	Heterokontophyta	Oomycetes	Peronosporales	Peronosporaceae	Bremia	Bremia centaureae	0	70	0	0	0	0	0	0	0	0	0	0	0	0	0	0	0	0	0	0	0	0	0	0	0	0	0	5	0	0	0	0	0	0	0	0	0	0	0	33	0	0
ASV834	Stramenopila	Heterokontophyta	Oomycetes	Pythiales	Pythiaceae	Globisporangium	Globisporangium intermedium	0	0	0	0	0	0	0	0	0	0	0	0	0	0	0	0	0	0	0	0	0	0	0	0	0	0	0	0	0	0	0	0	0	0	0	0	0	0	0	0	0	0
ASV835	Stramenopila	Heterokontophyta	Oomycetes	Pythiales	Pythiaceae	Pythium	Pythium sp.	0	46	0	0	0	47	0	0	0	0	0	0	0	0	0	0	0	0	0	0	44	0	0	0	0	0	0	0	0	0	0	0	0	0	0	0	0	0	0	0	0	0
ASV836			Chrysophyceae	Chromulinales	Chromulinaceae	Pedospumella	Pedospumella sp. JBM19	0	0	0	0	0	0	0	0	0	0	0	0	0	0	0	106	0	0	0	0	0	0	0	0	0	0	0	0	0	0	0	0	0	0	0	0	0	0	0	0	0	0
ASV837	Metazoa	Chordata	Actinopteri	Kurtiformes	Apogonidae	Sphaeramia	Sphaeramia orbicularis	0	0	15	20	0	0	0	0	0	0	0	0	0	0	0	0	0	0	0	0	0	224	66	0	0	0	0	0	0	0	0	0	0	0	0	0	0	0	0	0	0	0
ASV838			Chrysophyceae	Chromulinales	Chromulinaceae	'Spumella-like'	Spumella-like flagellate 1031	0	0	0	0	0	0	0	0	0	0	0	0	0	0	0	0	0	0	0	0	0	0	0	0	23	0	0	0	0	0	0	0	0	0	0	0	0	0	0	0	0	0
ASV839			Chrysophyceae	Chromulinales	Chromulinaceae	Pedospumella	Pedospumella sp. JBM19	0	0	0	0	0	0	0	0	0	0	0	0	0	0	0	0	0	0	0	0	0	0	0	0	0	0	0	0	0	0	0	0	0	0	0	0	0	0	0	0	0	0
ASV840	Stramenopila	Heterokontophyta	Oomycetes	Pythiales	Pythiogetonaceae	Pythiogeton	Pythiogeton proliferatum	0	0	0	0	0	0	0	0	0	0	0	0	0	0	0	0	0	0	0	0	0	0	0	0	0	0	0	0	0	0	0	0	0	0	0	0	0	0	0	0	0	0
ASV841			Chrysophyceae	Chromulinales	Chromulinaceae	'Spumella-like'	Spumella-like flagellate 1031	0	0	0	0	0	0	0	0	0	0	12	0	0	0	0	0	0	0	0	0	0	0	0	0	0	0	0	0	0	0	0	0	48	15	57	0	0	0	0	0	0	0
ASV842	Stramenopila	Heterokontophyta	Oomycetes	Pythiales	Pythiaceae	Pythium	Pythium cf. deliense D2.5S2P21-2	0	0	0	0	0	0	0	0	0	0	0	0	0	0	145	85	92	0	0	0	0	0	0	0	0	0	0	0	0	0	0	0	0	0	0	0	0	0	0	0	0	0
ASV843	Stramenopila	Heterokontophyta	Oomycetes	Pythiales	Pythiaceae	Globisporangium	Globisporangium intermedium	0	0	0	0	0	0	0	0	0	0	0	0	0	0	0	0	322	0	0	0	0	0	0	0	0	0	0	0	0	0	0	0	0	0	0	0	0	0	0	0	0	0
ASV844	Stramenopila	Heterokontophyta	Oomycetes	Pythiales	Pythiaceae	Pythium	Pythium polymastum	0	0	0	0	0	0	0	0	0	0	0	0	0	0	0	0	0	0	0	0	0	0	0	0	0	0	0	0	0	0	0	0	0	0	0	0	0	101	0	0	0	0
ASV845	Fungi	'uncultured fungus'	'uncultured fungus'	'uncultured fungus'	'uncultured fungus'	'uncultured fungus'	uncultured fungus	0	0	0	0	0	0	0	0	0	0	0	0	0	0	0	0	0	0	0	0	0	0	0	0	0	0	0	0	35	0	0	0	0	0	0	0	0	0	0	21	7	0
ASV846			Chrysophyceae	Chromulinales	Chromulinaceae	'Spumella-like'	Spumella-like flagellate 1006	0	0	0	0	0	0	0	0	0	0	0	0	0	0	0	0	0	0	0	0	0	0	0	0	0	0	0	0	0	0	147	0	0	0	0	0	0	0	0	0	0	0
ASV847	Stramenopila	Heterokontophyta	Oomycetes	Peronosporales	Peronosporaceae	Hyaloperonospora	Hyaloperonospora cochleariae	0	0	0	0	0	0	0	0	0	0	0	0	0	0	0	0	0	0	0	0	0	16	30	0	0	0	0	0	0	0	0	0	0	0	0	12	0	0	0	0	0	0
ASV848			Chrysophyceae	Chromulinales	Chromulinaceae	Spumella	Spumella rivalis	0	0	0	0	0	0	0	0	0	0	0	0	0	0	0	0	0	0	0	0	0	0	0	0	0	0	0	0	0	0	0	0	0	0	0	83	0	0	0	0	0	59
ASV849			Chrysophyceae	Chromulinales	Chromulinaceae	'Spumella-like'	Spumella-like flagellate 391f	0	0	0	0	0	0	0	0	0	0	0	0	0	0	0	0	0	0	0	0	0	0	0	0	0	0	0	0	0	0	0	0	0	0	0	16	71	0	8	0	0	0
ASV850	Stramenopila	Heterokontophyta	Oomycetes	Peronosporales	Peronosporaceae	Peronospora	Peronospora arvensis	0	0	0	0	0	0	0	0	0	0	0	0	0	0	0	0	0	0	0	0	0	0	0	0	0	0	0	0	0	0	0	0	0	0	0	0	0	0	0	0	0	0
ASV851	Stramenopila	Heterokontophyta	Oomycetes	Pythiales	Pythiaceae	Pythium	Pythium heterothallicum	0	0	0	0	0	0	0	0	0	0	0	0	0	0	0	0	0	0	0	0	0	0	0	0	0	0	0	0	0	0	0	0	0	0	0	0	0	0	0	0	0	0
ASV852	Stramenopila	Heterokontophyta	Oomycetes	Albuginales	Albuginaceae	Pustula	Pustula tragopogonis	0	0	0	0	0	0	0	0	0	0	0	0	0	0	0	0	0	0	0	0	0	0	0	0	0	0	316	0	0	0	0	0	0	0	0	0	0	0	0	0	0	0
ASV853			Chrysophyceae			Segregatospumella	Segregatospumella sp.	0	0	0	0	0	0	0	0	0	0	0	0	0	0	0	0	0	0	0	0	0	0	0	0	0	0	0	0	0	0	0	0	0	0	0	0	0	22	0	0	0	0
ASV854	Stramenopila	Heterokontophyta	Oomycetes	Pythiales	Pythiaceae	Pythium	Pythium longisporangium	0	0	0	0	0	0	0	0	0	0	0	0	0	0	0	0	0	0	0	0	0	0	0	0	0	0	0	0	0	0	0	0	0	0	0	0	0	0	0	0	0	0
ASV855			Chrysophyceae	Chromulinales	Chromulinaceae	Pedospumella	Pedospumella sp. JBM19	0	0	0	0	0	0	0	0	0	0	0	0	0	0	0	0	0	0	0	0	11	0	0	0	0	0	153	0	0	0	0	118	0	0	0	0	0	0	0	0	0	0
ASV856	Stramenopila	Heterokontophyta	Oomycetes	Pythiales	Pythiaceae	Pythium	Pythium vanterpoolii	0	0	0	0	0	0	0	198	0	0	0	0	0	0	0	0	0	0	0	0	0	0	0	0	0	0	0	0	0	0	0	0	0	0	0	0	0	0	0	0	0	0
ASV857	Stramenopila	Heterokontophyta	Oomycetes	Pythiales	Pythiaceae	Pythium	Pythium polymastum	0	0	0	0	169	0	0	0	0	0	0	0	0	0	0	0	0	0	0	0	0	0	0	0	0	0	0	0	0	0	0	0	0	0	0	0	0	0	0	0	0	0
ASV858	Stramenopila	Heterokontophyta	Oomycetes	Saprolegniales	Saprolegniaceae	Aphanomyces	Aphanomyces sp.	0	0	0	0	0	0	0	0	0	313	0	0	0	0	0	0	0	0	0	0	0	0	0	0	0	0	0	0	0	0	0	0	0	0	0	0	0	0	0	0	0	0
ASV859	Stramenopila	Heterokontophyta	Oomycetes	Pythiales	Pythiaceae	Globisporangium	Globisporangium ultimum	0	0	0	0	0	0	0	0	0	0	0	0	0	0	0	0	0	0	0	0	0	0	0	0	0	0	0	0	0	0	0	0	0	0	0	152	122	0	0	0	0	0
ASV860	Fungi	'uncultured fungus'	'uncultured fungus'	'uncultured fungus'	'uncultured fungus'	'uncultured fungus'	uncultured fungus	0	0	0	0	0	0	0	0	0	0	0	0	0	0	0	0	0	0	0	0	0	0	0	0	0	0	0	0	0	0	0	0	0	0	0	0	0	0	0	0	0	0
ASV861	Stramenopila	Heterokontophyta	Oomycetes	Saprolegniales	Saprolegniaceae	Aphanomyces	Aphanomyces sp.	0	0	0	0	0	0	0	0	0	0	0	0	0	0	0	0	0	0	0	0	0	0	0	0	0	0	0	0	0	0	0	0	0	0	0	0	0	0	0	0	0	0
ASV862	Viridiplantae	Streptophyta	Magnoliopsida	Brassicales	Brassicaceae	Arabis	Arabis alpina	0	0	0	0	0	0	0	0	0	0	0	0	0	0	0	0	0	0	0	0	0	0	0	0	0	0	0	0	0	0	0	0	0	0	0	0	0	0	0	0	0	0
ASV863	Stramenopila	Heterokontophyta	Oomycetes	Pythiales	Pythiaceae	Pythium	Pythium rostratifingens	61	0	0	0	0	0	0	0	0	0	0	0	0	0	0	0	0	0	0	0	0	0	0	0	0	0	0	0	0	0	0	0	0	0	0	0	0	0	0	0	0	0
ASV864			Chrysophyceae	Chromulinales	Chromulinaceae	Spumella	Spumella sp.	0	0	0	0	0	0	0	0	0	0	0	0	0	0	0	0	0	0	0	0	0	0	0	0	0	16	0	0	0	0	0	0	0	0	0	0	0	0	0	0	0	0
ASV865	Stramenopila	Heterokontophyta	Oomycetes	Saprolegniales	Saprolegniaceae	Aphanomyces	Aphanomyces stellatus	0	0	0	0	0	0	0	0	0	0	0	0	0	0	0	0	0	0	0	0	0	0	0	0	0	0	0	0	0	0	0	0	0	0	0	0	0	0	0	0	0	0
ASV866	Stramenopila	Heterokontophyta	Oomycetes	Pythiales	Pythiaceae	Pythium	Pythium pleroticum	0	0	0	0	0	0	0	0	0	0	0	0	0	0	0	0	0	0	0	0	0	0	0	0	0	0	0	0	0	0	0	0	0	0	0	0	0	0	0	0	0	0
ASV867			Chrysophyceae	Chromulinales	Chromulinaceae	Pedospumella	Pedospumella sp. JBM19	0	0	0	0	0	0	0	0	0	0	0	0	0	0	0	0	0	0	0	0	0	0	0	0	0	0	0	0	0	0	0	0	0	0	0	0	0	0	0	0	0	0
ASV868			Dinophyceae	Prorocentrales	Prorocentraceae	Prorocentrum	Prorocentrum micans	0	0	0	0	0	0	0	0	0	0	0	0	15	0	0	0	0	0	0	0	0	0	0	0	0	0	221	0	0	0	0	0	0	71	0	0	0	0	0	0	0	0
ASV869	Stramenopila	Heterokontophyta	Oomycetes	Pythiales	Pythiaceae	Pythium	Pythium oligandrum	0	0	0	0	0	0	0	0	0	0	0	0	0	0	0	0	0	0	0	0	0	0	0	0	0	0	0	0	0	0	0	0	0	0	0	0	0	0	0	0	0	0
ASV870			Chrysophyceae	Chromulinales	Chromulinaceae	Spumella	Spumella sp.	0	0	0	0	0	0	0	0	0	0	0	0	0	0	0	0	0	0	0	0	3	0	0	3	23	17	0	0	0	0	0	2	34	0	0	0	0	0	0	0	0	0
ASV871	Stramenopila	Heterokontophyta	Oomycetes	Pythiales	Pythiaceae	Pythium	Pythium anandrum	0	0	0	0	0	0	0	0	0	117	48	0	0	0	0	0	0	0	0	0	0	0	0	0	0	77	0	0	0	0	0	0	0	0	0	0	0	0	0	0	0	0
ASV872			Chrysophyceae	Chromulinales	Chromulinaceae	'Spumella-like'	Spumella-like flagellate 391f	0	0	0	4	0	0	0	0	0	0	0	0	0	0	0	0	0	0	0	0	0	0	0	0	9	0	0	0	0	0	0	0	24	0	0	0	0	0	0	0	0	8
ASV873	Stramenopila	Heterokontophyta	Oomycetes	Leptomitales		Apodachlya	Apodachlya minima	0	0	0	0	0	0	0	0	0	0	0	0	263	0	0	0	0	0	0	0	0	0	0	0	0	0	0	0	0	0	0	0	0	0	0	0	0	0	0	0	0	0
ASV874			Chrysophyceae	Chromulinales	Chromulinaceae	'Spumella-like'	Spumella-like flagellate Got220	0	0	124	181	0	0	0	0	0	0	0	0	0	0	0	0	0	0	0	0	0	0	0	0	0	0	0	0	0	0	0	0	0	0	0	0	0	0	0	0	0	0
ASV875	Fungi	'uncultured fungus'	'uncultured fungus'	'uncultured fungus'	'uncultured fungus'	'uncultured fungus'	uncultured fungus	0	0	0	0	0	0	0	0	0	0	0	0	0	0	0	0	0	0	0	0	0	0	0	0	0	0	0	0	0	0	0	0	0	0	0	0	0	0	0	0	0	0
ASV876			Chrysophyceae			'Spumella-like'	Spumella-like flagellate JBC/S24	0	0	0	0	0	0	0	0	0	0	0	0	0	0	0	0	0	0	0	0	0	0	0	0	0	0	0	0	0	0	0	0	0	0	0	0	0	84	0	0	0	0
ASV877	Stramenopila	Heterokontophyta	Oomycetes	Pythiales	Pythiaceae	Globisporangium	Globisporangium oryzicola	0	0	0	29	0	0	0	0	0	0	0	0	0	0	0	0	0	0	0	0	0	0	0	0	0	0	0	0	0	0	0	0	0	0	0	0	0	0	0	0	0	0
ASV878	Stramenopila	Heterokontophyta	Oomycetes	Pythiales	Pythiaceae	Pythium	Pythium pyrilobum	0	303	0	0	0	0	0	0	0	0	0	0	0	0	0	0	0	0	0	0	0	0	0	0	0	0	0	0	0	0	0	0	0	0	0	0	0	0	0	0	0	0
ASV879	Fungi	'uncultured fungus'	'uncultured fungus'	'uncultured fungus'	'uncultured fungus'	'uncultured fungus'	uncultured fungus	0	0	0	0	0	0	0	0	0	0	0	0	0	0	0	0	0	0	0	0	0	0	0	0	0	0	0	0	0	0	0	0	0	0	0	0	0	0	0	0	0	0
ASV880							eukaryotic synthetic construct	0	0	11	0	0	0	0	0	0	0	0	0	0	0	0	0	0	0	0	0	0	187	104	0	0	0	0	0	0	0	0	0	0	0	0	0	0	0	0	0	0	0
ASV881	Stramenopila	Heterokontophyta	Oomycetes	Leptomitales		Apodachlya	Apodachlya minima	0	0	0	0	0	0	0	0	0	0	0	0	302	0	0	0	0	0	0	0	0	0	0	0	0	0	0	0	0	0	0	0	0	0	0	0	0	0	0	0	0	0
ASV882	Stramenopila	Heterokontophyta	Oomycetes	Peronosporales	Peronosporaceae	Phytophthora	Phytophthora cf. megasperma	0	0	0	0	0	0	0	0	0	0	0	0	0	0	0	0	0	0	0	0	0	0	0	0	0	0	0	0	0	0	0	0	0	0	0	0	0	0	0	0	0	0
ASV883	Stramenopila	Heterokontophyta	Oomycetes	Pythiales	Pythiaceae	Pythium	Pythium monospermum	0	0	0	0	0	0	0	0	0	0	0	0	0	0	0	0	0	0	0	0	0	0	0	0	0	0	0	0	0	0	0	0	0	0	0	0	0	0	0	0	0	0
ASV884		Bacillariophyta	Bacillariophyceae	Cymbellales	Gomphonemataceae	Gomphonema	Gomphonema parvulum	0	0	0	0	0	0	0	0	0	0	0	0	0	0	0	0	0	0	0	0	0	0	0	0	0	0	0	0	0	0	0	0	0	0	0	0	0	0	0	0	0	0
ASV885	Fungi	'uncultured fungus'	'uncultured fungus'	'uncultured fungus'	'uncultured fungus'	'uncultured fungus'	uncultured fungus	0	0	0	0	0	0	0	0	0	0	0	0	52	0	0	0	0	0	0	0	0	0	0	0	0	0	0	0	0	0	0	0	0	0	0	0	0	0	0	0	0	0
ASV886	Stramenopila	Heterokontophyta	Oomycetes	Saprolegniales	Saprolegniaceae	Pythiopsis	Pythiopsis terrestris	0	0	0	0	0	0	0	0	165	0	0	0	0	0	0	0	0	0	0	0	0	0	0	0	0	0	0	0	0	0	0	0	0	0	0	0	0	0	0	0	0	0
ASV887	Stramenopila	Heterokontophyta	Oomycetes	Peronosporales	Peronosporaceae	Hyaloperonospora	Hyaloperonospora arabidopsidis	0	0	0	0	0	0	0	0	0	0	0	0	0	0	0	0	0	0	0	0	0	0	0	0	0	0	0	0	0	0	0	0	0	0	0	0	0	0	162	138	0	0
ASV888			Chrysophyceae	Chromulinales	Chromulinaceae	Pedospumella	Pedospumella sp.	0	0	59	0	0	0	0	0	0	0	0	0	0	0	0	0	0	0	0	0	0	0	0	0	0	0	0	0	0	0	0	0	0	0	0	0	241	0	0	0	0	0
ASV889			Chrysophyceae	Chromulinales	Chromulinaceae	Spumella	Spumella rivalis	0	0	0	0	0	0	0	0	0	0	0	0	0	0	0	0	0	0	0	0	0	0	0	0	0	17	0	0	0	0	0	0	64	0	0	0	0	0	0	0	0	0
ASV890	Metazoa	Chordata	Mammalia	Rodentia	Muridae	Mus	Mus musculus	0	0	0	0	0	0	0	0	0	0	0	0	0	0	0	0	0	0	0	0	0	106	175	0	0	0	0	0	0	0	0	0	0	0	0	0	0	0	0	0	0	0
ASV891		Ciliophora	Oligohymenophorea	Hymenostomatida	Tetrahymenidae	Tetrahymena	Tetrahymena thermophila	0	0	0	0	0	0	0	0	0	0	0	0	0	0	0	0	0	0	0	0	0	0	270	0	0	0	0	0	0	0	0	0	0	0	0	0	0	0	0	0	0	0
ASV892	Stramenopila	Heterokontophyta	Oomycetes	Pythiales	Pythiaceae	Pythium	Pythium rostratifingens	0	0	0	0	0	0	0	0	0	0	0	0	0	0	0	0	0	0	0	0	0	0	0	0	0	0	0	0	299	0	0	0	0	0	0	0	0	0	0	0	0	0
ASV893			Chrysophyceae	Chromulinales	Chromulinaceae	'Spumella-like'	Spumella-like flagellate 1006	0	0	0	0	0	0	0	0	0	0	0	0	0	0	0	0	0	0	0	0	0	0	0	0	0	0	0	0	0	0	0	0	0	0	0	0	0	0	0	0	0	0
ASV894	Fungi	'uncultured fungus'	'uncultured fungus'	'uncultured fungus'	'uncultured fungus'	'uncultured fungus'	uncultured fungus	0	0	0	0	0	0	0	0	0	0	0	0	0	0	0	0	0	0	0	0	0	0	0	0	0	0	0	0	0	0	0	0	0	0	0	0	0	0	0	0	0	0
ASV895	Stramenopila	Heterokontophyta	Oomycetes	Pythiales	Pythiaceae	Pythium	Pythium sylvaticum	0	0	0	0	0	0	0	0	0	0	0	0	0	0	0	0	0	0	0	0	0	0	0	0	0	0	0	0	0	0	0	0	0	0	0	0	0	0	0	0	0	0
ASV896	Stramenopila	Heterokontophyta	Oomycetes	Pythiales	Pythiaceae	Pythium	Pythium pachycaule	0	0	0	0	0	0	0	0	0	0	0	0	0	0	0	0	0	0	0	0	0	0	0	0	0	0	0	0	0	0	0	0	0	0	0	0	0	0	0	0	0	0
ASV897	Stramenopila	Heterokontophyta	Oomycetes	Pythiales	Pythiaceae	Pythium	Pythium polymastum	0	0	0	0	0	0	0	0	0	0	0	0	0	0	0	0	0	0	0	0	0	0	0	0	0	0	0	0	0	0	0	0	0	0	0	0	0	0	0	294	0	0
ASV898	Stramenopila	Heterokontophyta	Oomycetes	Pythiales	Pythiaceae	Pythium	Pythium pyrilobum	0	0	0	0	0	0	0	0	0	0	0	0	0	0	0	0	0	0	0	0	0	0	0	0	0	0	0	0	0	0	0	0	0	0	0	0	0	0	0	0	0	0
ASV899	Stramenopila	Heterokontophyta	Oomycetes	Pythiales	Pythiaceae	Pythium	Pythium rostratifingens	0	0	0	0	0	0	0	0	0	0	0	0	0	0	0	0	0	0	0	0	0	0	0	0	0	0	0	0	0	0	0	0	0	0	0	0	0	0	0	0	0	0
ASV900	Stramenopila	Heterokontophyta	Oomycetes	Pythiales	Pythiogetonaceae	Pythiogeton	Pythiogeton uniforme	0	0	7	0	0	0	0	0	0	0	0	0	0	0	0	0	0	0	0	0	0	0	0	0	0	0	0	0	0	0	0	0	0	0	0	260	0	0	0	0	0	0
ASV901	Fungi	'uncultured fungus'	'uncultured fungus'	'uncultured fungus'	'uncultured fungus'	'uncultured fungus'	uncultured fungus	0	0	20	0	0	0	35	80	0	0	0	0	0	0	0	0	0	0	0	0	0	0	0	0	0	0	0	0	0	0	0	0	0	0	0	0	0	0	0	0	0	0
ASV902	Stramenopila	Heterokontophyta	Oomycetes	Pythiales	Pythiaceae	Pythium	Pythium perplexum	0	0	0	0	0	0	0	0	0	0	0	0	0	0	0	0	0	0	0	0	0	0	0	0	0	0	0	0	0	0	0	0	0	0	0	0	0	0	0	0	0	0
ASV903	Fungi	'uncultured fungus'	'uncultured fungus'	'uncultured fungus'	'uncultured fungus'	'uncultured fungus'	uncultured fungus	0	0	0	0	0	0	0	0	0	0	0	0	0	0	0	0	0	0	0	0	0	0	0	0	0	0	0	0	0	0	0	0	0	0	0	0	0	0	0	79	0	0
ASV904	Stramenopila	Heterokontophyta	Oomycetes	Pythiales	Pythiaceae	Pythium	Pythium polymastum	0	0	0	0	0	0	0	0	0	0	0	0	0	0	0	0	0	0	0	0	0	0	0	0	0	0	0	0	0	0	0	0	0	0	0	0	0	0	0	0	0	0
ASV905	Stramenopila	Heterokontophyta	Oomycetes	Pythiales	Pythiaceae	Pythium	Pythium monospermum	0	0	0	0	0	0	0	0	0	0	0	0	0	0	0	0	0	0	0	0	0	0	0	0	0	0	0	0	0	0	0	0	0	0	0	0	0	0	0	0	0	0
ASV906			Chrysophyceae			'Spumella-like'	Spumella-like flagellate JBNZ39	0	0	9	0	0	0	0	0	0	0	0	0	0	0	0	0	0	0	0	0	0	0	8	0	0	0	0	0	0	0	0	0	0	0	0	0	0	0	0	0	0	4
ASV907	Stramenopila	Heterokontophyta	Oomycetes	Pythiales	'uncultured Pythium'	'uncultured Pythium'	uncultured Pythium	0	0	0	0	0	0	0	0	0	0	0	0	0	0	0	0	0	0	0	0	0	0	0	286	0	0	0	0	0	0	0	0	0	0	0	0	0	0	0	0	0	0
ASV909	Stramenopila	Heterokontophyta	Oomycetes	Pythiales	Pythiaceae	Pythium	Pythium heterothallicum	0	95	0	0	0	0	0	0	161	0	0	0	0	0	0	0	0	0	0	0	0	0	0	0	0	0	0	0	0	0	0	0	0	0	0	0	0	0	0	0	0	0
ASV910	Stramenopila	Heterokontophyta	Oomycetes	Pythiales	Pythiaceae	Phytopythium	Phytopythium vexans	0	0	0	0	0	0	0	0	0	0	0	0	0	0	0	0	0	0	0	0	0	0	0	0	0	0	0	0	0	0	0	0	0	0	0	0	0	154	130	0	0	0
ASV911	Stramenopila	Heterokontophyta	Oomycetes	Pythiales	Pythiaceae	Pythium	Pythium nunn	0	0	0	0	0	0	0	0	0	0	0	0	0	0	0	0	0	0	0	0	0	0	0	0	0	0	0	0	0	0	0	0	0	0	0	0	0	0	0	0	0	0
ASV912	Stramenopila	Heterokontophyta	Oomycetes	Saprolegniales	Saprolegniaceae	Aphanomyces	Aphanomyces euteiches	0	0	0	0	0	0	0	0	0	0	0	134	0	0	0	0	0	0	0	0	0	0	0	0	0	0	0	0	0	0	0	0	0	0	0	0	0	0	0	0	0	0
ASV913	Stramenopila	Heterokontophyta	Oomycetes	Pythiales	Pythiaceae	Pythium	Pythium sp. PI-5	0	0	0	0	0	0	0	0	0	0	0	0	0	0	0	0	0	0	0	0	0	0	0	0	0	0	0	0	0	0	0	0	0	0	0	0	0	0	0	0	0	0
ASV914	Metazoa	Arthropoda	Insecta	Hymenoptera	Apidae	Apis	Apis dorsata	0	0	0	0	0	0	0	0	0	0	0	0	0	0	0	0	0	0	0	0	0	220	63	0	0	0	0	0	0	0	0	0	0	0	0	0	0	0	0	0	0	0
ASV915	Stramenopila	Heterokontophyta	Oomycetes	Pythiales	Pythiaceae	Globisporangium	Globisporangium spinosum	0	0	0	0	0	0	0	0	0	0	0	0	0	0	0	0	0	0	0	0	0	0	0	0	0	0	0	0	0	0	0	0	0	0	0	0	0	0	0	0	0	0
ASV916	Metazoa	Arthropoda	Insecta	Hymenoptera	Chrysididae	Chrysis	Chrysis longula	0	0	237	45	0	0	0	0	0	0	0	0	0	0	0	0	0	0	0	0	0	0	0	0	0	0	0	0	0	0	0	0	0	0	0	0	0	0	0	0	0	0
ASV917	Stramenopila	Heterokontophyta	Oomycetes	Pythiales	Pythiaceae	Pythium	Pythium uncinulatum	0	0	0	0	0	17	0	0	0	153	0	0	0	0	0	0	0	0	0	0	0	0	0	0	0	0	0	0	0	0	0	0	0	0	0	0	0	0	0	0	0	0
ASV918	Stramenopila	Heterokontophyta	Oomycetes	Pythiales	Pythiaceae	Pythium	Pythium acanthicum	0	0	0	0	0	0	0	0	0	0	0	0	0	0	0	0	0	0	0	0	58	0	0	0	0	0	0	0	0	0	0	0	0	0	0	0	0	0	0	0	77	0
ASV919	Viridiplantae	Streptophyta	Magnoliopsida	Malpighiales	Salicaceae	Populus	Populus trichocarpa	53	0	0	0	0	0	0	135	0	0	0	0	0	0	0	0	0	0	0	0	0	0	0	0	0	0	0	0	0	0	0	0	52	0	0	0	0	0	0	0	0	0
ASV920	Stramenopila	Heterokontophyta	Oomycetes	Pythiales	Pythiaceae	Pythium	Pythium volutum	0	0	0	0	0	0	0	0	0	0	0	0	0	0	0	0	0	0	0	0	0	0	0	0	0	0	0	0	0	0	0	0	0	0	0	0	0	0	0	0	0	0
ASV921			Chrysophyceae	Chromulinales	Chromulinaceae	Spumella	Spumella sp.	0	0	0	0	0	0	0	0	0	0	0	0	0	0	0	0	0	0	0	0	0	0	0	0	0	0	0	0	0	0	0	0	0	0	0	0	0	0	0	0	0	0
ASV922	Metazoa	Chordata	Actinopteri	Kurtiformes	Apogonidae	Sphaeramia	Sphaeramia orbicularis	0	0	0	0	0	0	0	0	0	0	0	0	0	0	0	0	0	0	0	0	0	0	0	0	3	0	0	0	0	0	0	0	5	0	0	0	0	0	0	0	0	0
ASV923	Stramenopila	Heterokontophyta	Oomycetes	Pythiales	Pythiaceae	Globisporangium	Globisporangium intermedium	29	0	0	0	0	0	0	0	0	0	0	0	0	0	0	0	0	0	0	0	0	0	0	0	0	0	0	0	0	0	0	0	0	0	0	0	0	0	0	0	0	0
ASV924		Firmicutes	Bacilli	Bacillales	Bacillaceae	Bacillus	Bacillus butanolivorans	11	0	0	0	0	0	0	0	0	0	0	33	0	0	0	0	0	0	0	0	0	0	0	0	0	0	0	0	0	0	0	0	105	0	0	0	0	0	0	0	0	0
ASV926			Chrysophyceae	Chromulinales	Chromulinaceae	Pedospumella	Pedospumella sp. JBM19	0	0	0	0	0	0	0	0	0	0	0	0	0	0	0	0	0	0	0	0	0	0	0	0	0	0	0	5	0	0	0	0	144	0	0	0	0	0	0	55	33	0
ASV927			Dinophyceae	Prorocentrales	Prorocentraceae	Prorocentrum	Prorocentrum micans	0	0	0	0	0	0	0	0	0	0	0	0	118	97	0	0	0	0	3	0	34	0	0	0	0	0	0	0	0	0	0	25	0	0	0	0	0	0	0	0	0	0
ASV928	Metazoa	Mollusca	Bivalvia	Pectinoida	Pectinidae	Mizuhopecten	Mizuhopecten yessoensis	0	0	0	0	0	0	0	0	0	0	0	0	0	0	0	0	0	0	0	0	0	0	0	0	0	0	0	0	0	0	0	0	0	0	0	0	0	0	0	0	0	0
ASV929			Chrysophyceae	Chromulinales	Chromulinaceae	'Spumella-like'	Spumella-like flagellate Got220	0	0	2	0	0	0	0	0	0	0	0	0	0	0	0	0	0	0	0	0	0	0	0	0	0	0	0	0	0	0	0	0	0	0	0	0	0	98	0	0	0	0
ASV930	Stramenopila	Heterokontophyta	Oomycetes	Pythiales	Pythiaceae	Pythium	Pythium sp. AL-2010	0	0	0	0	0	0	0	0	0	0	0	0	0	129	0	0	0	0	0	0	0	0	0	0	0	0	0	0	0	0	0	0	0	0	0	0	0	0	0	0	0	0
ASV931			Chrysophyceae	Chromulinales	Chromulinaceae	Spumella	Spumella vulgaris	0	0	0	0	0	2	0	0	68	16	0	0	0	0	0	0	0	0	0	0	0	0	0	0	0	0	0	0	0	0	0	0	0	0	0	0	0	0	0	19	0	0
ASV932	Stramenopila	Heterokontophyta	Oomycetes	Pythiales	Pythiaceae	Pythium	Pythium sylvaticum	29	0	0	0	147	0	0	0	0	0	0	0	0	0	0	0	0	0	0	0	0	0	0	0	0	0	0	0	0	0	0	0	0	0	0	0	0	0	0	0	0	0
ASV933	Viridiplantae	Streptophyta	Magnoliopsida	Gentianales	Apocynaceae	Ochrosia	Ochrosia miana	0	0	0	20	0	0	0	0	0	0	0	0	0	0	0	0	0	0	0	0	0	124	130	0	0	0	0	0	0	0	0	0	0	0	0	0	0	0	0	0	0	0
ASV934	Metazoa	Chordata	Actinopteri	Cypriniformes	Cyprinidae	Cyprinus	Cyprinus carpio	0	0	0	0	0	0	0	0	0	0	0	0	0	0	0	0	0	0	0	0	0	0	0	0	0	0	0	0	0	0	0	0	0	0	0	0	0	0	0	0	0	0
ASV935	Stramenopila	Heterokontophyta	Oomycetes	Pythiales	Pythiaceae	Pythium	Pythium oligandrum	0	0	0	0	0	0	0	0	0	0	0	0	0	0	0	0	0	0	0	0	0	0	0	0	0	0	0	0	0	0	0	0	0	0	0	0	0	0	0	0	0	0
ASV936	Stramenopila	Heterokontophyta	Oomycetes	Pythiales	Pythiaceae	Pythium	Pythium volutum	0	0	0	0	0	0	0	0	0	0	0	0	0	0	0	0	0	0	0	0	0	0	0	0	0	0	0	0	0	0	0	0	0	0	0	0	0	0	0	0	0	0
ASV937		Ciliophora	Oligohymenophorea	Hymenostomatida	Tetrahymenidae	Tetrahymena	Tetrahymena thermophila	0	0	0	0	0	0	0	0	0	0	0	0	0	0	0	0	0	0	0	0	0	137	49	0	0	0	0	0	0	0	0	0	0	0	0	0	0	0	0	0	0	0
ASV938	Metazoa	Platyhelminthes	Trematoda	Strigeidida	Schistosomatidae	Schistosoma	Schistosoma mansoni	0	0	0	0	0	0	0	0	0	0	0	0	0	0	0	0	0	0	0	0	0	0	0	0	0	0	0	0	0	0	0	0	0	0	0	0	0	0	0	0	0	0
ASV939	Stramenopila	Heterokontophyta	Oomycetes	Pythiales	Pythiaceae	Pythium	Pythium sp. unique1sub3	0	0	0	0	0	0	0	0	0	0	0	0	0	0	0	0	0	0	0	0	0	0	0	0	0	0	0	0	0	0	0	0	0	0	0	0	0	0	0	0	0	0
ASV940	Stramenopila	Heterokontophyta	Oomycetes	Pythiales	Pythiaceae	Pythium	Pythium volutum	0	0	0	0	0	0	0	0	0	135	0	0	0	0	0	0	0	0	0	0	0	0	0	0	0	0	0	0	0	0	0	0	0	0	0	0	0	0	0	0	0	0
ASV941	Fungi	'uncultured fungus'	'uncultured fungus'	'uncultured fungus'	'uncultured fungus'	'uncultured fungus'	uncultured fungus	0	0	0	0	0	0	0	0	0	0	68	0	0	0	0	0	0	0	0	0	0	0	0	0	0	0	0	0	0	0	0	0	0	0	0	0	0	0	0	0	0	137
ASV942	Fungi	'uncultured fungus'	'uncultured fungus'	'uncultured fungus'	'uncultured fungus'	'uncultured fungus'	uncultured fungus	0	0	0	0	0	0	0	0	0	0	0	0	0	0	0	0	0	0	0	0	0	0	0	0	0	0	0	0	0	0	0	0	0	0	0	0	0	0	0	0	0	0
ASV943	Fungi	Ascomycota	Saccharomycetes	Saccharomycetales	Saccharomycetaceae	Saccharomyces	Saccharomyces cerevisiae	0	0	0	0	0	0	0	0	0	0	0	0	0	0	0	0	0	0	0	0	0	0	0	0	0	0	0	0	0	0	0	0	0	0	0	0	0	0	0	0	0	0
ASV944	Fungi	'uncultured fungus'	'uncultured fungus'	'uncultured fungus'	'uncultured fungus'	'uncultured fungus'	uncultured fungus	0	0	0	0	0	0	0	0	0	0	0	0	0	0	0	0	0	144	0	0	0	0	0	0	0	0	0	0	0	0	91	0	0	0	0	0	0	0	0	0	0	0
ASV945	Stramenopila	Heterokontophyta	Oomycetes	Pythiales	Pythiaceae	Pythium	Pythium apiculatum	0	0	0	0	0	0	0	0	0	0	0	0	0	0	0	0	0	0	0	0	0	0	0	0	0	0	0	0	0	0	0	0	0	0	0	0	0	0	0	0	0	0
ASV946			Dinophyceae	Prorocentrales	Prorocentraceae	Prorocentrum	Prorocentrum micans	0	0	0	0	0	0	0	0	0	0	0	0	0	0	0	0	0	0	0	0	0	0	0	13	194	0	0	0	0	0	0	0	0	0	0	0	0	0	0	0	0	0
ASV947	Stramenopila	Heterokontophyta	Oomycetes	Pythiales	Pythiogetonaceae	Pythiogeton	Pythiogeton zizaniae	0	0	0	0	0	8	0	0	0	0	0	0	0	0	0	0	0	0	0	0	0	0	0	0	0	0	0	0	0	0	0	0	0	0	0	0	0	0	0	0	0	0
ASV948	Stramenopila	Heterokontophyta	Oomycetes	Pythiales	Pythiaceae	Pythium	Pythium aff. perplexum	0	0	0	0	0	0	0	0	0	0	0	0	0	0	0	0	0	0	0	264	0	0	0	0	0	0	0	0	0	0	0	0	0	0	0	0	0	0	0	0	0	0
ASV949	Stramenopila	Heterokontophyta	Oomycetes	Pythiales	Pythiaceae	Pythium	Pythium aff. monospermum	0	0	9	242	0	0	0	0	0	0	0	0	0	0	0	0	0	0	0	0	0	0	0	0	0	0	0	0	0	0	0	0	0	0	0	0	0	0	0	0	0	0
ASV950	Stramenopila	Heterokontophyta	Oomycetes	Pythiales	Pythiaceae	Pythium	Pythium inflatum	0	0	0	0	0	0	0	0	0	0	0	0	0	0	0	0	0	0	0	0	0	0	0	0	0	0	0	0	0	0	0	0	0	0	0	0	0	0	0	0	0	0
ASV951	Fungi	'uncultured fungus'	'uncultured fungus'	'uncultured fungus'	'uncultured fungus'	'uncultured fungus'	uncultured fungus	0	0	0	5	0	0	0	0	0	0	0	0	0	0	0	0	0	0	0	0	0	0	0	0	0	0	0	0	0	0	0	0	0	0	0	0	257	0	0	0	0	0
ASV952	Stramenopila	Heterokontophyta	Oomycetes	Saprolegniales	Saprolegniaceae	Plectospira	Plectospira myriandra	0	0	0	0	0	0	50	0	0	0	0	0	0	0	0	0	0	0	0	0	21	0	0	0	0	0	0	0	0	0	0	0	0	191	0	0	0	0	0	0	0	0
ASV953	Stramenopila	Heterokontophyta	Oomycetes	Pythiales	Pythiaceae	Pythium	Pythium sp. M-2017a	0	0	0	0	0	0	0	0	0	0	0	0	0	0	0	0	0	0	0	0	0	0	0	0	0	0	0	0	0	0	0	0	0	0	0	0	0	0	0	0	0	0
ASV954	Stramenopila	Heterokontophyta	Oomycetes	Saprolegniales	Saprolegniaceae	Dictyuchus	Dictyuchus monosporus	0	93	0	0	0	19	0	0	0	0	0	0	0	0	0	0	0	0	0	0	0	0	0	0	0	0	0	0	0	0	0	0	0	0	0	0	0	0	0	0	0	0
ASV955	Stramenopila	Heterokontophyta	Oomycetes	Pythiales	Pythiaceae	Pythium	Pythium sp. CAL-2011f	0	0	0	0	0	0	0	0	0	0	0	0	91	0	0	0	0	0	0	0	55	0	0	0	0	0	0	0	0	0	0	0	0	0	0	0	0	0	0	0	0	0
ASV956	Stramenopila	Heterokontophyta	Oomycetes	Pythiales	Pythiaceae	Pythium	Pythium sp. V1	0	0	0	0	0	16	0	0	0	223	0	0	0	0	0	0	0	0	0	0	0	0	0	0	0	0	0	0	0	0	0	0	0	0	0	0	0	0	0	0	0	0
ASV957	Stramenopila	Heterokontophyta	Oomycetes	Leptomitales		Apodachlya	Apodachlya brachynema	0	0	0	0	0	0	0	0	0	0	0	0	0	0	0	0	0	0	0	0	0	0	0	0	0	0	0	0	0	0	0	0	0	0	0	0	0	0	0	0	0	0
ASV958	Stramenopila	Heterokontophyta	Oomycetes			Haptoglossa	Haptoglossa zoospora	0	46	0	0	0	0	0	0	0	0	0	0	0	0	0	0	0	0	0	0	0	0	0	0	0	0	0	0	0	0	0	0	0	0	0	0	0	0	0	0	0	0
ASV959	Viridiplantae	Streptophyta	Magnoliopsida	Solanales	Solanaceae	Solanum	Solanum lycopersicum	0	0	0	0	0	0	0	0	0	0	241	5	0	0	0	0	0	0	0	0	0	0	0	0	0	0	0	0	0	0	0	0	0	0	0	0	0	0	0	0	0	0
ASV960			Chrysophyceae	Chromulinales	Chromulinaceae	'Spumella-like'	Spumella-like flagellate 391f	0	0	0	0	0	0	0	0	0	0	0	0	0	0	0	0	0	0	0	0	0	0	0	0	0	0	0	0	0	0	0	0	0	0	0	0	0	0	0	0	0	0
ASV961	Stramenopila	Heterokontophyta	Oomycetes				Oomycetes sp. NF-4	0	0	0	0	0	0	0	0	0	0	0	0	0	0	4	177	76	0	0	0	0	0	0	0	0	0	0	0	0	0	0	0	0	0	0	0	0	0	0	0	0	0
ASV962			Chrysophyceae	Chromulinales	Chromulinaceae	'Spumella-like'	Spumella-like flagellate 1006	0	0	0	0	0	0	0	0	0	0	0	0	0	0	0	0	0	0	0	0	0	0	0	0	0	0	0	0	0	0	0	0	0	64	0	0	0	0	0	0	0	0
ASV963		Bacillariophyta	Bacillariophyceae	Naviculales	Naviculaceae	Navicula	Navicula trivialis	0	0	0	0	0	0	0	0	80	176	0	0	0	0	0	0	0	0	0	0	0	0	0	0	0	0	0	0	0	0	0	0	0	0	0	0	0	0	0	0	0	0
ASV964	Stramenopila	Heterokontophyta	Oomycetes	Saprolegniales	Saprolegniaceae	Achlya	Achlya bisexualis	0	0	0	0	0	0	0	0	0	0	0	0	0	256	0	0	0	0	0	0	0	0	0	0	0	0	0	0	0	0	0	0	0	0	0	0	0	0	0	0	0	0
ASV965	Stramenopila	Heterokontophyta	Oomycetes	Peronosporales	Peronosporaceae	Phytophthora	Phytophthora cactorum	0	0	0	0	0	0	0	0	0	0	0	0	0	0	0	0	0	0	0	0	0	0	0	0	0	0	0	0	0	0	0	0	0	0	0	0	0	0	0	0	0	0
ASV966	Stramenopila	Heterokontophyta	Oomycetes	Pythiales	Pythiaceae	Globisporangium	Globisporangium spinosum	0	0	0	0	0	0	0	0	0	0	0	0	0	0	0	0	0	0	0	0	0	0	0	0	0	0	0	0	0	0	0	0	0	0	0	0	0	0	0	0	0	0
ASV967	Viridiplantae	Streptophyta	Magnoliopsida	Malpighiales	Salicaceae	Populus	Populus trichocarpa	0	0	0	0	0	0	0	0	137	0	0	0	0	0	0	0	0	0	0	0	0	0	0	0	0	0	0	0	0	0	0	0	0	0	0	0	0	0	0	0	0	0
ASV968		Bacillariophyta	Bacillariophyceae	Surirellales	Surirellaceae	Surirella	Surirella sp. CCAP 1071/2	0	143	0	0	0	0	0	0	112	0	0	0	0	0	0	0	0	0	0	0	0	0	0	0	0	0	0	0	0	0	0	0	0	0	0	0	0	0	0	0	0	0
ASV969			Dinophyceae	Prorocentrales	Prorocentraceae	Prorocentrum	Prorocentrum micans	0	0	0	0	0	0	0	0	0	0	0	0	0	0	0	0	0	0	0	0	0	0	0	0	0	0	0	0	0	0	0	0	0	0	0	0	0	0	0	0	0	0
ASV970	Stramenopila	Heterokontophyta	Oomycetes	Pythiales	Pythiaceae	Pythium	Pythium monospermum	0	0	0	0	0	0	0	0	0	0	0	0	0	0	0	0	0	0	0	0	0	0	0	0	0	0	0	0	0	0	0	0	0	0	0	0	0	0	0	0	0	0
ASV971	Stramenopila	Heterokontophyta	Oomycetes	Saprolegniales	Saprolegniaceae	Achlya	Achlya ornata	0	0	0	0	0	0	0	0	0	0	0	0	0	0	0	0	0	0	0	0	0	0	0	0	0	0	0	0	0	0	0	0	0	0	0	0	0	0	0	0	0	0
ASV972	Stramenopila	Heterokontophyta	Oomycetes			Haptoglossa	Haptoglossa zoospora	60	0	0	0	0	0	0	0	0	0	0	0	0	0	0	0	0	0	0	0	0	0	0	0	0	0	0	0	0	0	0	0	0	0	0	0	0	0	0	0	0	0
ASV973		Apicomplexa	Aconoidasida	Haemosporida	Plasmodiidae	Plasmodium	Plasmodium sp. gorilla clade G3	0	0	0	0	0	0	0	0	0	0	0	0	0	0	0	0	0	0	0	0	0	246	8	0	0	0	0	0	0	0	0	0	0	0	0	0	0	0	0	0	0	0
ASV974	Stramenopila	Heterokontophyta	Oomycetes	Pythiales	Pythiaceae	Pythium	Pythium sp. unique1sub3	0	0	0	0	0	0	0	0	0	0	0	0	0	0	0	0	0	0	0	0	0	0	254	0	0	0	0	0	0	0	0	0	0	0	0	0	0	0	0	0	0	0
ASV975			Chrysophyceae	Chromulinales	Chromulinaceae	'Spumella-like'	Spumella-like flagellate 1006	0	0	0	0	0	0	0	0	0	0	0	0	0	0	0	0	0	0	0	0	0	0	0	0	0	0	0	0	0	0	0	0	0	0	0	0	0	0	0	0	0	0
ASV976	Viridiplantae	Streptophyta	Magnoliopsida	Malpighiales	Salicaceae	Populus	Populus trichocarpa	0	0	0	0	0	0	0	0	0	0	0	0	0	0	0	0	0	0	0	0	0	0	0	0	0	0	0	0	0	0	0	0	0	0	0	0	0	0	0	0	0	0
ASV977		'uncultured eukaryote'	'uncultured eukaryote'	'uncultured eukaryote'	'uncultured eukaryote'	'uncultured eukaryote'	uncultured eukaryote	0	0	0	0	0	0	0	0	0	0	0	0	0	0	0	0	0	0	0	0	0	0	0	0	0	0	0	0	0	0	0	0	0	0	0	0	0	0	0	0	0	0
ASV978	Stramenopila	Heterokontophyta	Oomycetes	Pythiales	Pythiaceae	Pythium	Pythium polymastum	0	252	0	0	0	0	0	0	0	0	0	0	0	0	0	0	0	0	0	0	0	0	0	0	0	0	0	0	0	0	0	0	0	0	0	0	0	0	0	0	0	0
ASV979		'uncultured eukaryote'	'uncultured eukaryote'	'uncultured eukaryote'	'uncultured eukaryote'	'uncultured eukaryote'	uncultured eukaryote	0	0	0	0	0	0	0	0	0	0	0	0	0	0	0	0	0	10	0	0	0	0	0	0	0	0	0	0	0	0	0	0	0	0	0	0	0	0	0	0	0	0
ASV980	Stramenopila	Heterokontophyta	Oomycetes	Lagenidiales	Lagenidiaceae	Lagenidium	Lagenidium sp. SLG-2014b	0	0	0	0	0	0	0	0	0	0	0	0	0	0	0	0	0	0	0	0	0	0	251	0	0	0	0	0	0	0	0	0	0	0	0	0	0	0	0	0	0	0
ASV981	Stramenopila	Heterokontophyta	Oomycetes	Lagenidiales	Lagenidiaceae	Lagenidium	Lagenidium sp. SLG-2014b	0	0	0	0	0	0	0	0	0	0	0	0	0	0	0	0	0	0	0	0	0	0	0	0	0	0	0	0	0	0	0	0	0	0	0	0	0	0	0	0	0	0
ASV982			Chrysophyceae	Chromulinales	Chromulinaceae	'Spumella-like'	Spumella-like flagellate 1006	0	0	0	0	0	0	0	0	0	0	0	0	0	0	0	0	0	0	0	0	0	0	0	0	0	0	0	0	0	0	0	0	0	0	0	0	0	0	0	0	0	0
ASV983			Chrysophyceae			'Spumella-like'	Spumella-like flagellate JBC/S24	0	0	0	0	0	0	0	0	0	0	0	0	0	0	12	0	0	0	0	0	0	0	0	0	0	0	0	0	0	0	0	0	0	0	0	0	0	0	0	0	0	0
ASV984	Viridiplantae	Streptophyta	Magnoliopsida	Vitales	Vitaceae	Vitis	Vitis vinifera	0	0	10	7	0	0	0	0	0	0	0	0	0	0	0	10	0	0	0	0	0	137	85	0	0	0	0	0	0	0	0	0	0	0	0	0	0	0	0	0	0	0
ASV985	Stramenopila	Heterokontophyta	Oomycetes	Pythiales	Pythiogetonaceae	Pythiogeton	Pythiogeton proliferatum	0	0	0	0	0	249	0	0	0	0	0	0	0	0	0	0	0	0	0	0	0	0	0	0	0	0	0	0	0	0	0	0	0	0	0	0	0	0	0	0	0	0
ASV986		'uncultured eukaryote'	'uncultured eukaryote'	'uncultured eukaryote'	'uncultured eukaryote'	'uncultured eukaryote'	uncultured eukaryote	0	0	0	0	0	0	0	0	0	0	0	0	0	0	0	0	0	0	0	0	0	0	0	0	0	0	0	0	0	0	0	0	0	0	0	0	112	0	0	0	0	0
ASV987	Fungi	'uncultured fungus'	'uncultured fungus'	'uncultured fungus'	'uncultured fungus'	'uncultured fungus'	uncultured fungus	0	0	0	0	0	0	0	0	0	0	0	0	0	0	0	0	0	0	0	0	0	0	0	0	0	118	0	0	0	0	0	0	0	0	0	0	0	0	0	0	0	0
ASV988			Chrysophyceae	Chromulinales	Chromulinaceae	Spumella	Spumella sp.	0	0	0	0	0	0	0	0	0	0	0	0	0	0	0	0	0	0	0	0	0	0	0	0	0	0	0	0	0	0	0	0	0	0	0	0	0	0	0	0	0	0
ASV989	Stramenopila	Heterokontophyta	Oomycetes	Pythiales	Pythiaceae	Pythium	Pythium aristosporum	0	0	0	0	0	48	0	0	0	0	0	0	0	0	0	0	0	0	0	0	0	0	0	0	0	0	0	0	0	0	0	0	0	0	0	0	0	0	0	46	0	0
ASV990	Fungi	'uncultured fungus'	'uncultured fungus'	'uncultured fungus'	'uncultured fungus'	'uncultured fungus'	uncultured fungus	0	0	0	0	0	0	0	0	0	0	0	0	0	0	0	0	0	0	0	0	0	8	0	0	0	0	0	0	0	0	0	0	46	0	0	0	0	0	0	0	0	0
ASV991	Stramenopila	Heterokontophyta	Oomycetes	Peronosporales	Peronosporaceae	Hyaloperonospora	Hyaloperonospora cochleariae	0	0	0	0	0	0	0	0	0	0	246	0	0	0	0	0	0	0	0	0	0	0	0	0	0	0	0	0	0	0	0	0	0	0	0	0	0	0	0	0	0	0
ASV992	Fungi	'uncultured fungus'	'uncultured fungus'	'uncultured fungus'	'uncultured fungus'	'uncultured fungus'	uncultured fungus	0	0	0	0	0	0	0	0	0	0	0	0	0	0	0	0	0	0	0	0	0	0	0	0	0	0	0	0	0	0	0	0	0	0	0	0	0	0	0	0	0	0
ASV993	Fungi	Ascomycota	Saccharomycetes	Saccharomycetales	Debaryomycetaceae	Debaryomyces	Debaryomyces hansenii	0	0	0	0	0	0	0	0	0	0	0	0	0	0	0	0	0	0	0	0	0	0	0	0	0	0	0	0	0	0	0	0	0	0	0	0	0	0	0	0	0	0
ASV994	Metazoa	Chordata	Actinopteri	Spariformes	Sparidae	Sparus	Sparus aurata	0	0	0	0	0	0	0	0	0	0	0	0	0	0	0	0	0	0	0	0	0	0	0	0	0	0	0	0	0	0	0	0	0	0	0	0	0	0	0	0	0	0
ASV995			Chrysophyceae	Chromulinales	Chromulinaceae	Pedospumella	Pedospumella sp. JBM19	0	0	0	0	0	0	0	0	0	0	0	0	0	0	0	0	0	0	0	0	0	0	0	0	0	0	0	0	0	0	0	0	0	0	0	0	0	0	0	0	0	0
ASV996			Dinophyceae	Prorocentrales	Prorocentraceae	Prorocentrum	Prorocentrum micans	0	0	0	0	0	0	0	0	0	0	0	0	0	0	0	0	0	0	0	0	0	0	0	0	0	0	20	0	0	0	0	0	0	0	0	0	0	0	0	0	0	0
ASV997			Chrysophyceae	Chromulinales	Chromulinaceae	'Spumella-like'	Spumella-like flagellate 391f	0	0	0	0	0	0	0	0	0	43	0	0	0	0	0	0	0	0	0	0	0	0	0	0	0	0	4	0	0	0	0	0	0	0	0	0	0	0	5	0	0	0
ASV998	Fungi	'uncultured fungus'	'uncultured fungus'	'uncultured fungus'	'uncultured fungus'	'uncultured fungus'	uncultured fungus	0	0	0	0	0	0	0	0	0	0	0	0	0	115	0	0	0	0	0	0	0	0	0	0	0	0	0	0	0	0	0	0	0	0	0	0	0	0	0	0	0	0
ASV999	Stramenopila	Heterokontophyta	Oomycetes	Peronosporales	Peronosporaceae	Phytophthora	Phytophthora undulata	0	0	0	0	30	0	0	0	145	0	0	0	0	0	0	0	0	0	0	0	0	0	0	0	0	0	0	0	0	0	0	0	0	0	0	0	0	0	0	0	0	0
ASV1001	Metazoa	Chordata	Aves	Apterygiformes	Apterygidae	Apteryx	Apteryx mantelli	0	0	0	0	0	0	0	0	0	0	0	0	0	0	0	0	0	0	0	0	0	0	0	0	0	0	0	0	0	0	0	0	0	0	0	0	0	0	0	0	0	0
ASV1002	Stramenopila	Heterokontophyta	Oomycetes	Pythiales	Pythiaceae	Pythium	Pythium attrantheridium	0	0	0	0	0	0	0	0	0	0	0	0	0	0	0	0	0	0	0	0	243	0	0	0	0	0	0	0	0	0	0	0	0	0	0	0	0	0	0	0	0	0
ASV1003	Fungi	'uncultured fungus'	'uncultured fungus'	'uncultured fungus'	'uncultured fungus'	'uncultured fungus'	uncultured fungus	0	0	0	0	0	0	0	0	0	0	0	0	0	0	0	0	0	0	0	0	0	0	0	0	0	0	0	0	0	0	0	0	0	0	0	0	0	0	0	0	0	0
ASV1004	Stramenopila	Heterokontophyta	Oomycetes	Peronosporales	Peronosporaceae	Phytophthora	Phytophthora pseudotsugae	0	0	0	0	0	0	0	0	0	0	0	0	0	0	0	0	242	0	0	0	0	0	0	0	0	0	0	0	0	0	0	0	0	0	0	0	0	0	0	0	0	0
ASV1005	Viridiplantae	Streptophyta	Magnoliopsida	Fabales	Fabaceae	Vigna	Vigna unguiculata	0	0	0	0	0	0	0	0	0	0	0	0	0	0	0	0	0	0	0	0	0	0	0	0	0	0	0	0	0	0	0	0	0	0	0	0	0	0	0	0	0	0
ASV1006	Metazoa	Chordata	Mammalia	Artiodactyla	Bovidae	Bos	Bos mutus	0	0	0	0	0	0	0	0	0	0	0	0	0	0	0	0	0	0	0	0	0	0	0	0	0	0	0	0	0	0	0	0	0	0	0	0	0	0	0	0	0	0
ASV1007	Stramenopila	Heterokontophyta	Oomycetes	Lagenidiales	Lagenidiaceae	Lagenidium	Lagenidium sp. PWL-2010i	0	0	0	0	0	0	0	0	0	0	0	0	39	0	0	0	0	0	0	0	0	0	0	0	0	0	0	0	0	0	0	0	0	0	0	0	0	0	0	0	0	0
ASV1008			Chrysophyceae	Chromulinales	Chromulinaceae	Spumella	Spumella sp.	0	0	0	0	0	0	0	0	0	0	0	0	0	0	0	0	0	0	0	0	0	0	0	0	0	0	0	0	0	0	0	0	0	0	0	0	0	0	0	0	0	0
ASV1009	Metazoa	Arthropoda	Insecta	Hymenoptera	Vespidae	Polistes	Polistes canadensis	0	0	0	0	0	0	0	0	0	0	0	0	0	0	0	0	0	0	0	0	0	0	0	0	0	0	0	0	0	0	0	0	0	0	0	0	0	0	0	0	0	0
ASV1010	Stramenopila	Heterokontophyta	Oomycetes	Pythiales	Pythiaceae	Pythium	Pythium pleroticum	0	0	0	0	0	0	0	0	0	0	0	0	0	0	0	0	0	0	0	0	0	0	0	0	0	0	0	0	0	0	0	0	0	0	0	0	0	0	0	0	0	0
ASV1011	Stramenopila	Heterokontophyta	Oomycetes	Pythiales	Pythiaceae	Globisporangium	Globisporangium oryzicola	0	0	68	35	0	0	0	0	0	0	0	0	0	0	0	0	0	0	0	0	0	0	0	0	0	0	0	0	0	0	0	0	0	0	0	0	0	0	0	0	0	0
ASV1012	Stramenopila	Heterokontophyta	Oomycetes	Pythiales	Pythiaceae	Phytopythium	Phytopythium vexans	0	0	0	0	0	0	0	0	0	0	0	0	0	0	0	0	0	0	0	0	0	0	0	0	0	0	0	0	0	0	0	0	0	0	0	0	0	0	0	0	0	0
ASV1013	Stramenopila	Heterokontophyta	Oomycetes	Pythiales	Pythiaceae	Phytopythium	Phytopythium citrinum	0	0	0	0	0	0	0	0	0	0	0	0	0	0	0	0	0	0	0	0	0	0	0	0	0	0	0	0	0	0	0	0	0	0	0	0	0	0	0	0	0	0
ASV1014			Chrysophyceae	Chromulinales	Chromulinaceae	'Spumella-like'	Spumella-like flagellate 1031	0	0	0	0	0	0	0	0	0	0	0	0	0	0	0	0	0	0	0	0	0	0	0	0	0	0	0	0	15	0	0	20	54	0	3	0	0	0	0	26	18	0
ASV1015	Metazoa	Chordata	Amphibia	Anura	Pipidae	Xenopus	Xenopus tropicalis	0	0	0	0	0	0	0	0	0	0	239	0	0	0	0	0	0	0	0	0	0	0	0	0	0	0	0	0	0	0	0	0	0	0	0	0	0	0	0	0	0	0
ASV1016		Ciliophora	Oligohymenophorea	Hymenostomatida	Tetrahymenidae	Tetrahymena	Tetrahymena thermophila	0	0	0	0	0	0	0	0	0	0	0	0	0	0	0	0	0	0	0	0	0	0	99	0	0	0	0	0	0	0	0	0	0	0	0	0	0	0	0	0	0	0
ASV1017	Fungi	'uncultured fungus'	'uncultured fungus'	'uncultured fungus'	'uncultured fungus'	'uncultured fungus'	uncultured fungus	0	53	0	0	0	0	0	185	0	0	0	0	0	0	0	0	0	0	0	0	0	0	0	0	0	0	0	0	0	0	0	0	0	0	0	0	0	0	0	0	0	0
ASV1018	Metazoa	Arthropoda	Insecta	Hymenoptera	Apidae	Apis	Apis dorsata	0	0	10	18	0	0	0	0	0	0	0	0	0	0	0	0	0	0	0	0	0	210	0	0	0	0	0	0	0	0	0	0	0	0	0	0	0	0	0	0	0	0
ASV1019	Metazoa	Chordata	Actinopteri	Cypriniformes	Cyprinidae	Cyprinus	Cyprinus carpio	0	0	0	0	0	0	0	0	0	0	0	0	0	0	0	0	0	0	0	0	27	0	0	0	0	0	0	0	0	0	0	0	0	0	0	0	0	0	0	0	0	0
ASV1020	Fungi	'uncultured fungus'	'uncultured fungus'	'uncultured fungus'	'uncultured fungus'	'uncultured fungus'	uncultured fungus	0	0	0	0	0	0	0	0	0	0	0	0	0	0	0	0	0	0	0	0	0	0	0	0	0	0	0	0	0	0	0	0	30	0	0	0	0	18	0	0	0	45
ASV1021	Viridiplantae	Streptophyta	Magnoliopsida	Malpighiales	Salicaceae	Populus	Populus trichocarpa	0	0	0	0	0	0	0	0	0	0	0	0	0	0	0	0	0	0	0	0	0	0	0	0	0	0	0	0	0	0	0	0	0	0	0	0	0	0	0	0	0	0
ASV1022			Chrysophyceae			'Spumella-like'	Spumella-like flagellate JBC/S24	0	0	0	0	0	0	0	0	0	0	0	0	0	0	0	0	0	0	0	0	0	0	0	0	0	0	0	0	0	0	0	0	0	0	0	0	0	0	0	0	0	0
ASV1023	Viridiplantae	Streptophyta	Magnoliopsida	Ranunculales	Papaveraceae	Papaver	Papaver somniferum	0	0	0	0	0	0	0	0	0	0	0	0	0	0	0	0	0	0	0	0	0	0	0	0	0	0	0	0	0	0	0	0	0	0	0	0	0	0	0	0	0	0
ASV1024	Stramenopila	Heterokontophyta	Oomycetes	Pythiales	Pythiaceae	Pythium	Pythium aphanidermatum	0	0	0	0	0	0	0	0	0	0	0	0	0	0	0	0	0	0	0	0	0	0	0	0	0	0	0	0	0	0	0	0	0	0	0	0	0	0	0	0	0	0
ASV1025			Chrysophyceae	Chromulinales	Chromulinaceae	Spumella	Spumella sp.	0	0	0	0	0	99	0	0	0	0	0	0	0	0	0	0	0	0	0	0	0	0	0	0	0	0	0	0	0	0	0	0	0	0	0	0	0	0	0	0	5	0
ASV1026	Metazoa	Chordata	Mammalia	Primates	Hominidae	Homo	Homo sapiens	0	0	0	0	0	0	0	0	0	0	0	0	0	0	0	0	0	0	0	0	0	0	0	0	0	0	0	0	0	0	0	0	0	0	0	0	0	0	0	0	0	0
ASV1027			Chrysophyceae	Chromulinales	Chromulinaceae	Spumella	Spumella sp.	0	0	0	0	0	0	0	0	0	0	0	0	0	0	0	0	0	0	0	0	0	0	0	0	0	0	0	0	0	0	0	0	0	0	0	0	0	0	0	0	0	0
ASV1028	Stramenopila	Heterokontophyta	Oomycetes	Pythiales	Pythiaceae	Pythium	Pythium oligandrum	0	0	0	0	0	0	0	0	0	0	0	0	0	0	0	0	0	0	0	0	0	0	0	0	0	0	0	0	0	0	0	0	0	0	0	0	0	0	0	0	0	0
ASV1029	Stramenopila	Heterokontophyta	Oomycetes	Pythiales	Pythiaceae	Pythium	Pythium sp. unique1	0	0	0	0	0	0	0	0	0	0	0	0	0	0	90	0	0	0	0	0	0	0	0	0	0	0	0	0	0	0	0	0	0	0	0	0	0	0	0	0	0	0
ASV1030	Fungi	'uncultured fungus'	'uncultured fungus'	'uncultured fungus'	'uncultured fungus'	'uncultured fungus'	uncultured fungus	0	0	0	0	0	0	0	0	0	0	0	0	0	0	0	0	0	0	0	0	3	0	0	0	0	0	0	0	0	0	0	0	25	0	0	0	0	0	0	0	0	100
ASV1031	Stramenopila	Heterokontophyta	Oomycetes	Pythiales	Pythiaceae	Pythium	Pythium polymastum	0	0	0	0	0	0	0	0	0	0	0	0	0	0	0	0	0	0	0	0	0	0	0	0	0	0	29	0	0	0	0	0	0	0	0	0	0	0	0	205	0	0
ASV1032	Stramenopila	Heterokontophyta	Oomycetes	Pythiales	Pythiaceae	Pythium	Pythium okanoganense	0	46	0	0	18	0	0	0	0	0	0	0	0	0	0	0	0	0	0	0	0	0	0	0	0	0	0	0	0	0	0	0	0	0	0	0	0	0	0	0	0	0
ASV1033		Apicomplexa	Aconoidasida	Haemosporida	Plasmodiidae	Plasmodium	Plasmodium sp. DRC-Itaito	0	0	126	108	0	0	0	0	0	0	0	0	0	0	0	0	0	0	0	0	0	0	0	0	0	0	0	0	0	0	0	0	0	0	0	0	0	0	0	0	0	0
ASV1034	Stramenopila	Heterokontophyta	Oomycetes	Pythiales	Pythiaceae	Pythium	Pythium sp. unique1	0	0	0	0	0	0	0	0	0	0	0	0	0	0	0	0	0	0	0	0	0	0	0	0	0	0	234	0	0	0	0	0	0	0	0	0	0	0	0	0	0	0
ASV1035	Metazoa	Chordata	Aves	Gruiformes	Mesitornithidae	Mesitornis	Mesitornis unicolor	0	0	0	0	0	0	0	0	0	0	0	0	0	0	0	0	0	0	0	0	0	0	0	0	0	0	0	0	0	0	0	0	0	0	0	0	0	0	0	0	0	0
ASV1036			Chrysophyceae			'Spumella-like'	Spumella-like flagellate JBC/S24	0	0	0	0	0	0	0	0	0	0	0	0	0	0	0	0	0	0	0	0	0	0	0	0	0	0	0	0	22	0	0	0	0	0	0	0	0	0	0	0	0	36
ASV1037	Fungi	'uncultured fungus'	'uncultured fungus'	'uncultured fungus'	'uncultured fungus'	'uncultured fungus'	uncultured fungus	0	0	0	0	0	0	0	0	0	0	0	0	0	0	0	0	0	0	0	0	0	0	0	0	0	0	0	0	0	0	0	0	121	0	0	0	0	0	0	0	0	91
ASV1038	Stramenopila	Heterokontophyta	Oomycetes	Pythiales	Pythiaceae	Phytopythium	Phytopythium citrinum	0	233	0	0	0	0	0	0	0	0	0	0	0	0	0	0	0	0	0	0	0	0	0	0	0	0	0	0	0	0	0	0	0	0	0	0	0	0	0	0	0	0
ASV1039	Stramenopila	Heterokontophyta	Oomycetes	Saprolegniales	Saprolegniaceae	Plectospira	Plectospira myriandra	0	0	0	0	0	0	0	232	0	0	0	0	0	0	0	0	0	0	0	0	0	0	0	0	0	0	0	0	0	0	0	0	0	0	0	0	0	0	0	0	0	0
ASV1040			Chrysophyceae	Chromulinales	Chromulinaceae	Pedospumella	Pedospumella sp. JBM19	0	0	0	0	0	0	0	0	0	0	0	0	0	0	0	0	0	0	0	0	0	0	0	0	0	0	0	0	0	0	0	0	0	0	0	0	0	0	0	0	0	0
ASV1041		Bacillariophyta	Bacillariophyceae	Surirellales	Surirellaceae	Surirella	Surirella sp. CCAP 1071/2	0	0	0	0	0	0	0	0	231	0	0	0	0	0	0	0	0	0	0	0	0	0	0	0	0	0	0	0	0	0	0	0	0	0	0	0	0	0	0	0	0	0
ASV1042	Stramenopila	Heterokontophyta	Oomycetes	Pythiales	Pythiaceae	Globisporangium	Globisporangium ultimum	0	0	0	0	0	0	0	0	0	0	0	0	0	0	0	0	0	0	231	0	0	0	0	0	0	0	0	0	0	0	0	0	0	0	0	0	0	0	0	0	0	0
ASV1043	Viridiplantae	Streptophyta	Magnoliopsida	Malpighiales	Salicaceae	Populus	Populus trichocarpa	0	0	0	0	0	0	0	0	0	0	0	0	0	0	0	0	0	0	0	0	0	0	0	0	0	0	0	0	0	0	0	0	0	0	0	0	0	0	0	0	0	0
ASV1044			Chrysophyceae	Chromulinales	Chromulinaceae	'Spumella-like'	Spumella-like flagellate 194f	0	0	0	0	0	0	0	0	0	0	0	0	0	0	0	0	0	0	0	0	0	0	0	0	0	0	0	0	0	0	0	0	0	0	0	0	0	0	0	0	0	0
ASV1045		Bacillariophyta	Bacillariophyceae	Surirellales	Surirellaceae	Surirella	Surirella sp. CCAP 1071/2	0	0	0	0	0	0	0	0	0	0	0	0	0	0	0	0	0	0	0	0	0	0	0	0	0	0	0	0	0	0	0	0	0	0	0	0	0	0	0	0	0	0
ASV1046			Chrysophyceae	Chromulinales	Chromulinaceae	'Spumella-like'	Spumella-like flagellate 1006	0	39	0	0	0	0	0	0	0	0	0	0	0	0	0	0	0	0	0	0	0	0	0	0	0	0	0	0	0	0	0	0	0	0	0	0	0	0	0	0	0	0
ASV1047	Stramenopila	Heterokontophyta	Oomycetes	Myzocytiopsidales	Myzocytiopsidaceae	Myzocytiopsis	Myzocytiopsis sp. venatrix	0	0	0	230	0	0	0	0	0	0	0	0	0	0	0	0	0	0	0	0	0	0	0	0	0	0	0	0	0	0	0	0	0	0	0	0	0	0	0	0	0	0
ASV1048	Fungi	'uncultured fungus'	'uncultured fungus'	'uncultured fungus'	'uncultured fungus'	'uncultured fungus'	uncultured fungus	0	0	0	0	0	0	0	0	0	0	0	0	0	0	0	0	0	0	0	0	0	0	0	0	0	0	0	0	0	0	0	0	0	0	0	0	0	0	0	0	0	0
ASV1049			Chrysophyceae			Segregatospumella	Segregatospumella sp.	0	0	0	0	0	0	0	0	0	0	0	0	0	0	0	0	0	0	0	0	0	0	0	0	0	0	0	0	0	0	0	0	0	0	0	0	0	0	0	0	0	0
ASV1050	Stramenopila	Heterokontophyta	Oomycetes	Lagenidiales		Paralagenidium	Paralagenidium karlingii	0	0	0	0	0	0	0	0	0	0	0	0	0	0	19	77	0	0	0	0	0	0	0	0	0	0	132	0	0	0	0	0	0	0	0	0	0	0	0	0	0	0
ASV1051	Stramenopila	Heterokontophyta	Oomycetes	Pythiales	Pythiaceae	Pythium	Pythium aff. macrosporum	0	0	0	0	0	0	0	0	0	0	0	0	0	0	0	0	0	0	0	0	0	0	0	0	0	0	0	0	0	0	0	0	0	57	0	0	0	0	0	0	0	0
ASV1052	Stramenopila	Heterokontophyta	Oomycetes	Peronosporales	Peronosporaceae	Hyaloperonospora	Hyaloperonospora barbareae	0	0	0	0	0	0	0	0	0	0	0	0	0	0	0	0	0	0	0	0	0	0	0	0	0	0	0	0	0	0	0	0	0	0	0	0	227	0	0	0	0	0
ASV1053	Stramenopila	Heterokontophyta	Oomycetes	Pythiales	Pythiogetonaceae	Pythiogeton	Pythiogeton proliferatum	0	0	0	0	0	0	0	0	0	0	0	0	0	0	0	0	0	0	0	0	0	0	0	0	0	0	0	0	0	0	0	0	0	0	0	0	0	0	0	0	0	0
ASV1054	Fungi	'uncultured fungus'	'uncultured fungus'	'uncultured fungus'	'uncultured fungus'	'uncultured fungus'	uncultured fungus	0	0	0	0	0	0	0	0	0	0	0	0	0	0	0	0	0	0	0	0	0	0	0	0	0	0	0	0	0	0	0	0	0	0	0	0	0	0	0	0	0	0
ASV1055	Stramenopila	Heterokontophyta	Oomycetes	Pythiales	Pythiaceae	Pythium	Pythium oligandrum	0	0	0	0	0	0	0	0	0	0	0	0	0	0	0	0	0	0	0	0	0	0	0	0	0	0	0	0	0	0	0	0	0	0	0	0	0	0	0	0	0	0
ASV1056	Stramenopila	Heterokontophyta	Oomycetes	Pythiales	Pythiaceae	Pythium	Pythium chondricola	0	0	0	0	110	0	0	0	0	0	0	0	0	0	0	0	0	0	0	0	0	0	0	0	0	0	0	0	0	0	0	0	0	0	0	0	0	0	0	0	0	0
ASV1057	Stramenopila	Heterokontophyta	Oomycetes	Pythiales	Pythiaceae	Phytopythium	Phytopythium citrinum	0	193	0	0	0	0	0	0	0	0	0	34	0	0	0	0	0	0	0	0	0	0	0	0	0	0	0	0	0	0	0	0	0	0	0	0	0	0	0	0	0	0
ASV1058	Fungi	'uncultured fungus'	'uncultured fungus'	'uncultured fungus'	'uncultured fungus'	'uncultured fungus'	uncultured fungus	0	0	164	63	0	0	0	0	0	0	0	0	0	0	0	0	0	0	0	0	0	0	0	0	0	0	0	0	0	0	0	0	0	0	0	0	0	0	0	0	0	0
ASV1059	Stramenopila	Heterokontophyta	Oomycetes	Saprolegniales	Saprolegniaceae	Aphanomyces	Aphanomyces stellatus	0	0	0	0	0	0	0	0	0	0	0	0	0	0	0	0	0	0	0	0	0	0	0	0	0	0	0	0	0	0	0	0	0	0	0	0	0	0	0	0	0	0
ASV1060	Stramenopila	Heterokontophyta	Oomycetes	Pythiales	Pythiaceae	Pythium	Pythium sp.	0	0	0	0	21	0	0	0	0	0	0	0	0	0	0	0	0	0	0	0	0	0	0	0	0	0	0	0	0	0	0	0	0	0	0	0	0	0	0	0	0	0
ASV1061	Fungi	'uncultured fungus'	'uncultured fungus'	'uncultured fungus'	'uncultured fungus'	'uncultured fungus'	uncultured fungus	0	0	0	0	0	0	0	0	0	0	0	0	0	0	0	0	0	0	0	0	0	0	0	0	0	0	0	0	0	0	0	0	0	0	0	9	56	0	0	0	0	0
ASV1062	Fungi	'uncultured fungus'	'uncultured fungus'	'uncultured fungus'	'uncultured fungus'	'uncultured fungus'	uncultured fungus	0	0	0	0	0	0	0	0	0	0	0	0	0	0	0	0	0	0	0	0	0	0	0	0	0	0	0	0	0	0	0	0	0	0	0	0	0	65	0	0	0	0
ASV1063	Stramenopila	Heterokontophyta	Oomycetes	Pythiales	Pythiaceae	Pythium	Pythium selbyi	0	0	0	0	0	0	0	0	0	0	0	0	0	0	0	0	0	0	0	0	0	0	0	0	0	0	0	0	0	0	0	0	0	0	0	0	0	0	0	0	0	0
ASV1064	Fungi	'uncultured fungus'	'uncultured fungus'	'uncultured fungus'	'uncultured fungus'	'uncultured fungus'	uncultured fungus	0	0	0	0	0	0	0	0	0	0	0	0	0	0	0	0	0	0	0	0	0	0	0	7	74	0	0	0	0	0	0	0	0	0	0	0	0	0	0	0	0	0
ASV1065	Stramenopila	Heterokontophyta	Oomycetes	Pythiales	Pythiaceae	Pythium	Pythium polymastum	0	224	0	0	0	0	0	0	0	0	0	0	0	0	0	0	0	0	0	0	0	0	0	0	0	0	0	0	0	0	0	0	0	0	0	0	0	0	0	0	0	0
ASV1066			Chrysophyceae	Chromulinales	Chromulinaceae	'Spumella-like'	Spumella-like flagellate Got220	0	0	0	0	0	0	0	0	0	0	0	0	0	0	0	0	0	0	0	0	0	0	0	0	0	0	0	0	0	0	0	0	0	0	0	0	0	0	0	37	0	0
ASV1067		Bacteroidetes	Flavobacteriia	Flavobacteriales	Flavobacteriaceae	Flavobacterium	Flavobacterium pallidum	0	0	0	0	0	0	0	0	0	0	0	0	0	0	0	0	0	0	0	0	0	0	0	0	0	0	0	0	0	0	0	0	0	0	0	0	0	0	0	0	0	0
ASV1068	Stramenopila	Heterokontophyta	Oomycetes	Pythiales	Pythiaceae	Pythium	Pythium rostratum	0	0	0	0	0	0	0	0	0	0	0	0	0	0	0	0	0	0	0	0	20	0	0	0	0	0	0	0	0	0	0	0	0	0	0	0	0	0	0	0	0	0
ASV1069		Bacillariophyta	Bacillariophyceae	Surirellales	Surirellaceae	Surirella	Surirella sp. CCAP 1071/2	0	0	0	0	0	0	0	0	223	0	0	0	0	0	0	0	0	0	0	0	0	0	0	0	0	0	0	0	0	0	0	0	0	0	0	0	0	0	0	0	0	0
ASV1070	Fungi	'uncultured fungus'	'uncultured fungus'	'uncultured fungus'	'uncultured fungus'	'uncultured fungus'	uncultured fungus	0	0	0	0	0	0	3	0	0	0	0	0	0	0	0	0	0	0	0	0	0	6	0	0	0	71	0	0	0	0	0	0	0	0	0	0	0	0	0	0	0	102
ASV1071	Fungi	'uncultured fungus'	'uncultured fungus'	'uncultured fungus'	'uncultured fungus'	'uncultured fungus'	uncultured fungus	0	0	0	0	0	0	0	0	0	0	0	0	0	0	0	0	0	0	0	0	0	0	0	0	0	0	0	0	0	0	0	0	0	0	0	193	0	0	0	0	0	0
ASV1072		'uncultured eukaryote'	'uncultured eukaryote'	'uncultured eukaryote'	'uncultured eukaryote'	'uncultured eukaryote'	uncultured eukaryote	0	0	0	0	0	0	0	0	0	0	0	0	0	0	0	0	0	0	0	0	0	0	0	0	0	0	0	0	0	0	0	0	0	0	0	0	0	0	0	0	0	0
ASV1073	Fungi	'uncultured fungus'	'uncultured fungus'	'uncultured fungus'	'uncultured fungus'	'uncultured fungus'	uncultured fungus	0	0	0	0	0	0	0	0	0	0	0	0	0	0	0	0	0	0	0	0	0	0	0	0	0	0	0	0	71	0	0	0	0	0	0	0	0	30	0	0	0	20
ASV1074			Chrysophyceae			Segregatospumella	Segregatospumella sp.	0	0	0	0	0	0	0	0	0	0	0	0	0	0	0	0	0	0	0	0	0	0	0	0	0	220	0	0	0	0	0	0	0	0	0	0	0	0	0	0	0	0
ASV1075	Stramenopila	Heterokontophyta	Oomycetes	Peronosporales	Peronosporaceae	Hyaloperonospora	Hyaloperonospora cochleariae	0	0	0	0	0	0	0	0	0	0	0	0	0	0	0	0	0	0	0	0	0	0	0	0	0	0	0	0	0	0	0	0	0	17	0	0	0	0	0	0	0	0
ASV1076	Stramenopila	Heterokontophyta	Oomycetes	Pythiales	Pythiogetonaceae	Pythiogeton	Pythiogeton uniforme	0	0	0	0	0	0	0	0	0	0	0	0	0	0	0	0	0	0	0	0	0	0	0	0	0	0	0	0	0	0	0	0	0	0	0	0	0	0	0	0	0	0
ASV1077	Stramenopila	Heterokontophyta	Oomycetes	Pythiales	Pythiaceae	Pythium	Pythium tracheiphilum	0	0	0	0	0	0	0	0	0	0	0	0	0	0	0	0	0	0	0	0	0	0	0	0	0	0	0	0	0	0	0	0	0	0	0	0	0	0	0	0	0	0
ASV1078	Metazoa	Chordata	Actinopteri	Kurtiformes	Apogonidae	Sphaeramia	Sphaeramia orbicularis	0	0	0	0	0	0	0	0	0	0	0	0	0	0	0	0	0	0	0	0	0	0	0	0	0	0	0	0	0	0	0	0	0	0	0	0	0	0	0	0	0	0
ASV1079	Fungi	'uncultured fungus'	'uncultured fungus'	'uncultured fungus'	'uncultured fungus'	'uncultured fungus'	uncultured fungus	0	0	0	0	0	0	0	0	0	0	17	0	0	0	0	0	0	0	0	0	0	0	0	0	0	0	0	0	12	0	0	0	0	0	12	0	0	0	0	0	0	0
ASV1080	Viridiplantae	Streptophyta	Magnoliopsida	Malpighiales	Salicaceae	Populus	Populus trichocarpa	0	0	24	0	0	0	0	0	0	0	0	0	0	0	0	0	0	0	0	0	0	0	0	0	0	0	132	0	0	0	0	0	0	0	0	0	0	0	0	0	0	0
ASV1081		Bacillariophyta	Bacillariophyceae	Surirellales	Surirellaceae	Surirella	Surirella sp. CCAP 1071/2	0	0	0	0	17	0	0	0	0	153	0	0	0	0	0	0	0	0	0	0	0	0	0	0	0	0	0	0	0	0	0	0	0	0	0	0	0	0	0	0	0	0
ASV1082	Stramenopila	Heterokontophyta	Oomycetes	Pythiales	Pythiaceae	Pythium	Pythium apiculatum	0	0	0	0	0	0	0	0	0	0	0	0	0	0	0	0	0	0	0	0	0	0	0	0	0	0	218	0	0	0	0	0	0	0	0	0	0	0	0	0	0	0
ASV1083	Fungi	'uncultured fungus'	'uncultured fungus'	'uncultured fungus'	'uncultured fungus'	'uncultured fungus'	uncultured fungus	0	0	0	0	0	0	0	0	0	0	0	0	0	0	0	0	0	0	0	0	0	0	0	0	0	0	0	0	0	0	0	0	0	0	0	0	0	0	0	0	0	0
ASV1084	Stramenopila	Heterokontophyta	Oomycetes	Pythiales	Pythiogetonaceae	Pythiogeton	Pythiogeton uniforme	0	0	0	0	0	0	0	0	0	0	0	0	0	0	0	0	0	0	0	0	0	0	0	0	0	0	0	0	0	0	0	0	0	0	0	0	0	0	0	0	0	0
ASV1085	Stramenopila	Heterokontophyta	Oomycetes	Pythiales	Pythiaceae	Pythium	Pythium monospermum	0	0	0	0	0	0	0	0	0	0	0	0	0	0	0	0	0	0	0	0	0	0	0	0	0	0	0	0	0	0	0	0	0	0	0	0	0	0	0	0	0	0
ASV1086	Stramenopila	Heterokontophyta	Oomycetes	Peronosporales	Peronosporaceae	Hyaloperonospora	Hyaloperonospora cochleariae	0	0	0	0	0	0	0	0	0	0	0	0	0	6	0	0	0	0	0	0	8	0	0	0	0	0	0	0	0	0	0	0	37	0	0	0	0	0	0	36	77	0
ASV1087	Stramenopila	Heterokontophyta	Oomycetes		Lagenaceae	Lagena	Lagena radicicola	0	0	0	0	0	0	0	217	0	0	0	0	0	0	0	0	0	0	0	0	0	0	0	0	0	0	0	0	0	0	0	0	0	0	0	0	0	0	0	0	0	0
ASV1088	Stramenopila	Heterokontophyta	Oomycetes	Pythiales	Pythiaceae	Pythium	Pythium pachycaule	0	0	0	0	0	0	0	0	0	0	0	0	0	0	0	0	0	0	0	0	0	0	0	0	0	0	0	0	0	0	0	0	0	0	0	0	0	0	0	0	0	0
ASV1089			Chrysophyceae	Chromulinales	Chromulinaceae	Spumella	Spumella rivalis	0	0	0	0	0	0	0	0	0	0	0	0	0	0	0	0	0	0	0	0	0	0	0	0	0	0	0	0	0	0	0	0	0	0	0	0	0	0	0	0	0	0
ASV1090	Metazoa	Nematoda	Chromadorea	Rhabditida	Strongyloididae	Strongyloides	Strongyloides stercoralis	212	4	0	0	0	0	0	0	0	0	0	0	0	0	0	0	0	0	0	0	0	0	0	0	0	0	0	0	0	0	0	0	0	0	0	0	0	0	0	0	0	0
ASV1091	Stramenopila	Heterokontophyta	Oomycetes	Pythiales	Pythiaceae	Pythium	Pythium sp. unique2	0	0	0	0	0	0	0	0	0	0	0	0	0	0	0	0	0	0	0	0	0	0	0	0	0	0	0	0	0	0	0	0	0	0	0	0	0	0	0	0	0	0
ASV1092			Dinophyceae	Prorocentrales	Prorocentraceae	Prorocentrum	Prorocentrum micans	0	0	0	0	0	0	0	0	0	0	0	26	0	0	0	0	0	0	0	0	0	0	0	0	0	0	0	0	0	0	0	0	0	0	0	0	0	0	0	0	0	0
ASV1093		Bacillariophyta	Bacillariophyceae	Surirellales	Surirellaceae	Surirella	Surirella sp. CCAP 1071/2	0	0	0	0	0	0	0	0	0	215	0	0	0	0	0	0	0	0	0	0	0	0	0	0	0	0	0	0	0	0	0	0	0	0	0	0	0	0	0	0	0	0
ASV1094	Stramenopila	Heterokontophyta	Oomycetes	Pythiales	Pythiaceae	Pythium	Pythium heterothallicum	0	0	0	0	0	0	0	0	0	0	0	0	0	0	0	0	0	0	0	0	0	0	0	0	0	0	0	0	0	0	0	0	0	0	0	0	0	0	0	0	0	0
ASV1095								0	0	0	0	0	0	0	0	0	0	0	0	0	0	0	0	0	0	0	0	0	0	0	0	16	0	0	15	0	0	0	0	0	3	0	0	0	0	0	21	0	0
ASV1096			Dinophyceae	Prorocentrales	Prorocentraceae	Prorocentrum	Prorocentrum micans	0	0	0	0	21	0	0	0	113	0	0	0	0	0	0	0	0	0	0	0	0	0	0	0	0	0	0	0	0	0	0	0	0	0	0	0	0	0	0	0	0	0
ASV1097	Stramenopila	Heterokontophyta	Oomycetes	Pythiales	Pythiaceae	Pythium	Pythium polymastum	0	0	0	0	0	0	0	0	0	214	0	0	0	0	0	0	0	0	0	0	0	0	0	0	0	0	0	0	0	0	0	0	0	0	0	0	0	0	0	0	0	0
ASV1098		Proteobacteria	Gammaproteobacteria	Enterobacterales	Morganellaceae	Proteus	Proteus vulgaris	0	0	0	0	0	0	0	0	0	0	0	0	0	0	0	0	0	0	0	0	0	0	0	0	0	0	0	0	0	0	0	0	0	0	0	0	0	0	0	190	0	0
ASV1099	Stramenopila	Heterokontophyta	Oomycetes	Pythiales	Pythiaceae	Pythium	Pythium polymastum	0	52	0	0	0	0	0	0	0	0	0	0	0	0	0	0	0	0	0	0	0	0	0	0	16	0	0	0	0	0	0	0	0	0	0	0	0	0	0	0	0	0
ASV1100	Stramenopila	Heterokontophyta	Oomycetes	Pythiales	Pythiaceae	Pythium	Pythium anandrum	0	0	0	0	8	0	0	0	0	0	66	0	0	0	0	0	0	0	0	0	0	0	0	0	0	0	0	0	0	0	0	0	0	0	0	0	0	0	0	0	32	0
ASV1101	Stramenopila	Heterokontophyta	Oomycetes	Pythiales	Pythiaceae	Pythium	Pythium sp. OPU1449	0	0	0	0	62	0	0	0	0	0	0	0	0	0	38	113	0	0	0	0	0	0	0	0	0	0	0	0	0	0	0	0	0	0	0	0	0	0	0	0	0	0
ASV1102	Fungi	'uncultured fungus'	'uncultured fungus'	'uncultured fungus'	'uncultured fungus'	'uncultured fungus'	uncultured fungus	0	0	0	0	0	0	0	0	0	0	0	0	0	0	0	0	0	0	0	0	0	0	0	0	0	0	0	0	0	0	0	0	0	0	0	19	0	7	0	0	0	0
ASV1103		Bacillariophyta	Bacillariophyceae	Bacillariales	Bacillariaceae	Cylindrotheca	Cylindrotheca closterium	0	0	0	0	0	0	0	0	0	0	0	0	0	0	0	0	0	0	0	0	0	0	0	0	0	0	0	0	0	0	0	0	0	0	0	0	0	0	0	15	0	0
ASV1104		Apicomplexa	Aconoidasida	Haemosporida	Plasmodiidae	Plasmodium	Plasmodium reichenowi	0	0	0	0	0	0	0	0	0	0	0	0	0	0	0	0	0	0	0	0	0	0	0	0	0	0	0	0	0	0	0	0	0	0	0	0	0	0	0	0	0	0
ASV1105	Metazoa	Arthropoda	Insecta	Lepidoptera	Noctuidae	Spodoptera	Spodoptera litura	0	0	0	0	0	0	0	0	0	0	0	0	0	0	0	0	0	0	0	0	0	0	0	0	0	0	0	0	0	0	0	0	0	0	0	0	0	0	0	0	0	0
ASV1106	Metazoa	Chordata	Aves	Apterygiformes	Apterygidae	Apteryx	Apteryx mantelli	0	0	0	0	0	0	0	0	0	0	0	0	0	0	0	0	0	0	0	0	0	0	0	0	0	0	0	0	0	0	0	0	0	0	0	0	0	0	0	0	0	0
ASV1107	Stramenopila	Heterokontophyta	Oomycetes	Lagenidiales	Haliphthoraceae	Atkinsiella	Atkinsiella dubia	0	0	0	0	0	0	0	0	0	0	0	0	0	0	0	0	0	0	0	0	0	0	0	0	0	0	0	19	0	0	0	0	0	0	0	0	0	0	193	0	0	0
ASV1108	Stramenopila	Heterokontophyta	Oomycetes	Pythiales	Pythiogetonaceae	Pythiogeton	Pythiogeton uniforme	0	0	0	0	0	0	0	34	0	0	0	0	0	0	0	0	0	0	0	0	0	0	0	0	0	0	0	0	91	0	0	0	0	0	0	0	0	0	0	0	0	0
ASV1109	Metazoa	Chordata	Actinopteri	Kurtiformes	Apogonidae	Sphaeramia	Sphaeramia orbicularis	0	0	0	0	0	0	0	0	0	0	0	0	0	0	0	0	0	0	0	0	0	212	0	0	0	0	0	0	0	0	0	0	0	0	0	0	0	0	0	0	0	0
ASV1110	Viridiplantae	Streptophyta	Magnoliopsida	Fabales	Fabaceae	Vigna	Vigna unguiculata	0	0	0	0	0	0	0	0	0	0	0	0	0	0	0	0	0	0	0	0	0	0	0	0	0	0	0	0	0	0	0	0	0	0	0	0	0	0	0	0	0	0
ASV1111	Fungi	'uncultured fungus'	'uncultured fungus'	'uncultured fungus'	'uncultured fungus'	'uncultured fungus'	uncultured fungus	0	0	0	0	0	0	0	0	0	0	0	0	0	0	0	0	0	0	0	0	0	0	0	0	0	0	0	0	0	0	0	0	0	0	0	0	0	0	0	0	0	0
ASV1112	Fungi	'uncultured fungus'	'uncultured fungus'	'uncultured fungus'	'uncultured fungus'	'uncultured fungus'	uncultured fungus	0	0	0	0	0	0	0	0	0	0	0	0	0	0	0	0	0	0	0	0	0	0	0	0	0	0	0	0	0	0	0	0	0	0	0	0	0	0	0	0	0	0
ASV1113			Chrysophyceae			Segregatospumella	Segregatospumella sp.	0	0	0	0	0	0	0	0	0	0	0	0	0	0	0	0	0	0	0	0	0	0	0	0	0	0	0	0	0	0	0	0	0	0	0	0	0	0	0	0	0	0
ASV1114	Metazoa	Chordata	Actinopteri		Ambassidae	Parambassis	Parambassis ranga	0	0	0	0	0	0	0	186	0	0	0	0	0	0	0	0	0	0	0	0	0	0	0	0	0	0	0	0	0	0	0	0	0	0	0	0	0	0	0	0	0	0
ASV1115	Metazoa	Chordata	Mammalia	Primates	Hominidae	Homo	Homo sapiens	0	0	0	0	0	0	0	0	0	0	0	0	0	0	0	0	0	0	0	0	0	0	0	0	0	0	0	0	0	0	0	0	0	0	0	0	0	0	0	0	0	0
ASV1116	Metazoa	Arthropoda	Insecta	Hymenoptera	Apidae	Apis	Apis dorsata	0	0	0	0	0	0	0	0	0	0	0	0	0	0	0	0	0	0	0	0	0	74	32	0	0	0	0	0	0	0	0	0	0	0	0	0	0	0	0	0	0	0
ASV1117		Bacillariophyta	Bacillariophyceae	Surirellales	Surirellaceae	Surirella	Surirella sp. CCAP 1071/2	0	25	0	0	0	0	0	0	185	0	0	0	0	0	0	0	0	0	0	0	0	0	0	0	0	0	0	0	0	0	0	0	0	0	0	0	0	0	0	0	0	0
ASV1118		Bacillariophyta	Bacillariophyceae	Surirellales	Surirellaceae	Surirella	Surirella sp. CCAP 1071/2	0	0	0	0	0	0	0	0	210	0	0	0	0	0	0	0	0	0	0	0	0	0	0	0	0	0	0	0	0	0	0	0	0	0	0	0	0	0	0	0	0	0
ASV1119			Chrysophyceae	Chromulinales	Chromulinaceae	Pedospumella	Pedospumella sp. JBM19	0	0	0	0	0	0	0	0	0	0	0	0	0	0	0	0	0	0	0	0	0	0	0	0	0	0	210	0	0	0	0	0	0	0	0	0	0	0	0	0	0	0
ASV1120	Stramenopila	Heterokontophyta	Oomycetes	Peronosporales	Peronosporaceae	Phytophthora	Phytophthora castanetorum	0	0	0	0	0	0	0	0	0	0	0	0	0	0	0	0	0	0	0	0	0	0	0	0	0	0	0	0	0	0	0	0	0	0	0	0	0	0	0	0	0	0
ASV1121							eukaryotic synthetic construct	0	0	0	0	0	0	0	0	0	0	0	0	0	0	0	0	0	0	0	0	0	0	0	0	0	0	0	0	0	0	0	0	0	0	0	0	0	0	0	0	0	0
ASV1122	Stramenopila	Heterokontophyta	Oomycetes	Pythiales	Pythiaceae	Pythium	Pythium oligandrum	0	0	0	0	0	0	0	0	0	0	0	0	0	0	0	0	0	0	0	0	0	0	0	0	0	0	0	0	0	0	0	0	0	0	0	0	0	0	0	0	0	0
ASV1123		'uncultured eukaryote'	'uncultured eukaryote'	'uncultured eukaryote'	'uncultured eukaryote'	'uncultured eukaryote'	uncultured eukaryote	0	0	0	0	0	0	0	0	0	0	0	0	0	0	0	0	0	0	0	0	0	0	0	0	0	0	0	0	0	0	0	0	0	0	0	0	0	0	0	0	0	0
ASV1124	Fungi	'uncultured fungus'	'uncultured fungus'	'uncultured fungus'	'uncultured fungus'	'uncultured fungus'	uncultured fungus	0	0	0	0	0	0	0	0	0	0	0	0	0	0	0	0	0	0	0	0	0	0	0	0	0	0	0	0	0	0	0	0	0	0	0	0	0	0	0	0	0	0
ASV1125	Viridiplantae	Streptophyta	Magnoliopsida	Brassicales	Brassicaceae	Brassica	Brassica oleracea	0	0	0	0	0	0	0	0	0	0	0	0	0	0	0	0	0	0	0	0	0	0	0	0	0	0	0	0	0	0	0	0	0	0	0	0	0	0	0	0	0	0
ASV1126	Stramenopila	Heterokontophyta	Oomycetes				Oomycetes sp. NF-4	0	0	0	0	0	0	0	0	0	0	0	0	0	0	0	0	0	0	0	0	0	0	0	0	0	0	0	0	0	0	0	0	0	0	0	0	0	0	0	0	0	0
ASV1127	Viridiplantae	Streptophyta	Magnoliopsida	Malpighiales	Salicaceae	Populus	Populus trichocarpa	0	0	0	0	0	0	0	0	0	0	0	0	0	0	0	0	0	0	0	0	0	0	0	0	0	0	0	0	0	0	0	0	0	0	0	0	0	0	0	0	0	0
ASV1128			Chrysophyceae			Segregatospumella	Segregatospumella sp.	0	0	0	0	0	0	0	0	0	0	0	0	0	0	0	0	0	0	0	0	0	0	0	0	0	67	0	0	0	0	0	0	0	0	0	140	0	0	0	0	0	0
ASV1129			Chrysophyceae	Chromulinales	Chromulinaceae	'Spumella-like'	Spumella-like flagellate 1031	0	0	0	0	0	0	0	0	0	0	90	0	0	0	0	0	0	0	0	0	0	0	0	0	0	0	0	0	0	0	0	0	0	0	0	0	0	0	0	0	0	0
ASV1130	Stramenopila	Heterokontophyta	Oomycetes	Pythiales	Pythiaceae	Pythium	Pythium attrantheridium	0	0	0	0	0	0	0	0	0	0	0	0	0	0	0	0	0	0	0	0	0	0	0	0	0	0	0	0	0	0	0	0	0	0	0	0	0	0	0	0	0	0
ASV1131		Bacillariophyta	Bacillariophyceae	Surirellales	Surirellaceae	Surirella	Surirella sp. CCAP 1071/2	0	0	0	0	0	0	0	0	0	0	0	0	0	0	0	0	0	0	0	0	0	0	0	0	0	0	0	0	0	0	0	0	0	0	0	0	0	0	0	0	0	0
ASV1132	Stramenopila	Heterokontophyta	Oomycetes	Pythiales	Pythiaceae	Pythium	Pythium sylvaticum	0	0	0	0	0	0	0	0	0	0	0	0	0	0	0	0	0	0	0	0	0	0	0	0	0	0	0	0	0	0	0	0	0	0	0	0	0	0	0	0	0	0
ASV1133		'uncultured eukaryote'	'uncultured eukaryote'	'uncultured eukaryote'	'uncultured eukaryote'	'uncultured eukaryote'	uncultured eukaryote	0	0	0	0	0	0	0	0	0	0	0	0	0	0	0	0	0	0	0	0	0	0	0	0	0	23	0	0	0	0	0	0	0	0	0	0	0	0	0	0	0	0
ASV1134	Stramenopila	Heterokontophyta	Oomycetes	Pythiales	Pythiaceae	Pythium	Pythium sylvaticum	0	0	0	0	0	0	0	0	0	0	0	0	0	0	0	0	0	0	0	0	0	0	0	0	0	0	0	0	0	0	0	0	0	0	0	0	0	0	0	0	0	0
ASV1135	Stramenopila	Heterokontophyta	Oomycetes	Pythiales	Pythiaceae	Pythium	Pythium tracheiphilum	0	0	0	0	0	0	0	0	0	0	0	0	0	0	0	0	0	0	0	0	0	0	0	0	0	0	0	0	0	0	0	0	0	0	0	0	0	0	0	0	0	0
ASV1136		Bacillariophyta	Bacillariophyceae	Surirellales	Surirellaceae	Surirella	Surirella sp. CCAP 1071/2	0	0	0	0	0	0	0	0	0	0	0	0	0	0	0	0	0	0	0	0	0	0	0	0	0	0	0	0	0	0	0	0	0	0	0	0	0	0	0	0	0	0
ASV1137			Chrysophyceae	Chromulinales	Chromulinaceae	Pedospumella	Pedospumella sp. JBM19	0	0	0	0	0	0	0	0	0	0	0	0	0	0	0	0	0	0	0	0	0	0	0	0	0	0	0	0	0	0	0	0	0	0	0	0	0	0	0	0	0	0
ASV1139		Ciliophora	Oligohymenophorea	Hymenostomatida	Tetrahymenidae	Tetrahymena	Tetrahymena thermophila	0	0	0	0	0	0	0	0	0	0	0	0	0	0	0	0	0	0	0	0	0	0	144	0	0	0	0	0	0	0	0	0	0	0	0	0	0	0	0	0	0	0
ASV1140	Stramenopila	Heterokontophyta	Oomycetes	Pythiales	Pythiaceae	Pythium	Pythium junctum	0	0	0	0	0	0	0	0	0	0	0	0	0	0	0	204	0	0	0	0	0	0	0	0	0	0	0	0	0	0	0	0	0	0	0	0	0	0	0	0	0	0
ASV1141	Stramenopila	Heterokontophyta	Oomycetes	Pythiales	Pythiaceae	Globisporangium	Globisporangium ultimum	0	0	0	0	0	0	0	0	0	0	0	0	0	0	0	0	0	0	0	0	0	0	0	0	0	0	0	0	0	0	0	0	0	0	0	0	0	0	0	0	0	0
ASV1142			Dinophyceae	Prorocentrales	Prorocentraceae	Prorocentrum	Prorocentrum micans	0	0	0	0	0	0	0	0	0	0	0	0	0	0	0	0	0	0	0	0	0	0	0	0	0	0	0	0	0	0	0	0	0	0	0	0	0	0	0	0	0	0
ASV1143			Chrysophyceae	Chromulinales	Chromulinaceae	Pedospumella	Pedospumella sp. JBM19	0	0	0	0	0	0	0	0	0	0	0	203	0	0	0	0	0	0	0	0	0	0	0	0	0	0	0	0	0	0	0	0	0	0	0	0	0	0	0	0	0	0
ASV1144			Chrysophyceae	Chromulinales	Chromulinaceae	'Spumella-like'	Spumella-like flagellate Got220	0	0	0	0	0	0	0	0	0	0	0	0	0	0	0	0	0	0	0	0	0	0	0	0	0	0	0	0	0	0	0	8	194	0	0	0	0	0	0	0	0	0
ASV1145	Metazoa	Chordata	Actinopteri	Kurtiformes	Apogonidae	Sphaeramia	Sphaeramia orbicularis	0	0	0	0	0	0	0	0	0	0	0	0	0	0	0	0	0	0	0	0	0	19	107	0	0	0	0	0	0	36	0	0	0	0	0	0	0	0	0	0	0	0
ASV1146	Stramenopila	Heterokontophyta	Oomycetes	Pythiales	Pythiaceae	Pythium	Pythium apleroticum	0	0	0	0	0	0	0	0	201	0	0	0	0	0	0	0	0	0	0	0	0	0	0	0	0	0	0	0	0	0	0	0	0	0	0	0	0	0	0	0	0	0
ASV1147	Viridiplantae	Streptophyta	Magnoliopsida	Zygophyllales	Krameriaceae	Krameria	Krameria bicolor	0	0	0	0	0	0	0	0	0	0	0	0	0	0	0	0	0	0	0	0	0	0	0	0	0	0	0	0	0	0	0	0	0	0	0	0	0	0	0	0	0	0
ASV1148	Viridiplantae	Streptophyta	Magnoliopsida	Fabales	Fabaceae	Dalbergia	Dalbergia cultrata	0	0	0	0	0	0	0	0	0	0	0	0	0	0	0	0	0	0	0	0	0	0	0	0	0	0	0	0	0	0	0	0	0	0	0	0	0	0	0	0	0	0
ASV1149			Chrysophyceae	Chromulinales	Chromulinaceae	'Spumella-like'	Spumella-like flagellate Got220	0	0	0	0	0	0	0	0	0	0	0	0	0	0	0	0	0	0	0	0	0	0	0	0	0	0	0	0	0	0	0	0	0	0	0	0	0	0	0	0	0	0
ASV1150		Bacillariophyta	Bacillariophyceae	Bacillariales	Bacillariaceae	Cylindrotheca	Cylindrotheca closterium	0	0	0	0	0	0	0	0	0	0	0	0	0	77	0	0	0	0	0	0	0	0	0	0	0	0	0	0	0	0	0	0	0	0	0	46	39	0	0	0	0	0
ASV1151	Fungi	'uncultured fungus'	'uncultured fungus'	'uncultured fungus'	'uncultured fungus'	'uncultured fungus'	uncultured fungus	0	0	0	0	0	0	0	0	0	0	0	0	0	0	0	0	0	0	0	0	0	0	0	0	0	0	0	0	0	0	0	0	0	7	0	4	0	23	0	0	0	0
ASV1152	Fungi	'uncultured fungus'	'uncultured fungus'	'uncultured fungus'	'uncultured fungus'	'uncultured fungus'	uncultured fungus	0	0	0	0	0	0	0	0	0	0	0	0	0	0	0	0	0	0	0	0	0	0	0	0	0	0	0	0	0	0	0	0	0	0	0	0	0	0	0	0	0	0
ASV1153	Stramenopila	Heterokontophyta	Oomycetes	Pythiales	Pythiaceae	Globisporangium	Globisporangium intermedium	0	0	0	0	0	0	0	0	0	0	0	0	0	0	0	0	0	0	0	0	0	0	0	0	0	0	0	0	0	0	0	0	0	0	0	0	0	0	0	0	0	0
ASV1154	Fungi	'uncultured fungus'	'uncultured fungus'	'uncultured fungus'	'uncultured fungus'	'uncultured fungus'	uncultured fungus	0	0	0	0	0	0	0	0	153	0	0	0	0	0	0	0	0	0	0	0	0	0	0	0	0	0	0	0	0	0	0	0	0	0	0	0	0	0	0	0	0	0
ASV1155	Stramenopila	Heterokontophyta	Oomycetes				Oomycetes sp. NF-4	0	0	0	0	0	0	0	0	0	0	0	0	0	0	0	0	0	0	0	0	0	0	0	0	0	0	0	0	0	0	0	0	0	0	0	0	0	0	0	0	0	0
ASV1156	Stramenopila	Heterokontophyta	Oomycetes	Peronosporales	Peronosporaceae	Phytophthora	Phytophthora cinnamomi	0	0	0	0	0	0	0	0	0	0	0	0	0	0	0	0	0	0	0	0	197	0	0	0	0	0	0	0	0	0	0	0	0	0	0	0	0	0	0	0	0	0
ASV1157	Stramenopila	Heterokontophyta	Oomycetes	Pythiales	Pythiogetonaceae	Pythiogeton	Pythiogeton uniforme	0	0	0	0	0	0	0	0	0	0	0	0	0	0	0	0	0	0	0	0	0	0	0	0	0	0	0	0	0	0	0	0	0	0	0	196	0	0	0	0	0	0
ASV1158	Stramenopila	Heterokontophyta	Oomycetes	Pythiales	Pythiaceae	Pythium	Pythium oligandrum	0	0	0	0	0	0	0	0	0	0	0	0	0	0	0	0	0	0	0	0	0	0	0	0	0	0	0	0	0	0	0	0	0	0	0	0	0	0	0	0	0	0
ASV1159	Stramenopila	Heterokontophyta	Oomycetes	Pythiales	Pythiaceae	Pythium	Pythium sp. unique1	0	0	0	0	0	0	0	0	0	0	0	0	0	0	0	0	0	0	0	0	0	0	0	0	0	0	0	0	0	0	0	0	0	0	0	0	0	0	0	0	0	0
ASV1160	Fungi	'uncultured fungus'	'uncultured fungus'	'uncultured fungus'	'uncultured fungus'	'uncultured fungus'	uncultured fungus	0	0	0	0	0	0	0	0	0	0	0	0	0	0	0	0	0	0	40	0	45	0	0	0	4	0	0	0	0	0	0	0	0	0	0	0	0	0	0	0	0	0
ASV1161	Stramenopila	Heterokontophyta	Oomycetes	Saprolegniales	Saprolegniaceae	Saprolegnia	Saprolegnia ferax	0	0	0	0	0	0	0	0	0	0	0	0	0	0	32	164	0	0	0	0	0	0	0	0	0	0	0	0	0	0	0	0	0	0	0	0	0	0	0	0	0	0
ASV1162		Bacillariophyta	Bacillariophyceae	Surirellales	Surirellaceae	Surirella	Surirella sp. CCAP 1071/2	0	0	0	0	0	0	0	0	0	0	0	0	0	0	0	0	0	0	0	0	0	0	0	0	196	0	0	0	0	0	0	0	0	0	0	0	0	0	0	0	0	0
ASV1163	Stramenopila	Heterokontophyta	Oomycetes	Peronosporales	Peronosporaceae	Peronospora	Peronospora belbahrii	0	0	0	0	0	0	0	0	0	0	0	0	0	0	0	0	0	0	0	0	0	0	0	0	0	196	0	0	0	0	0	0	0	0	0	0	0	0	0	0	0	0
ASV1164	Stramenopila	Heterokontophyta	Oomycetes	Peronosporales	Peronosporaceae	Hyaloperonospora	Hyaloperonospora cochleariae	0	0	0	0	0	0	0	0	0	0	170	0	0	0	0	0	0	0	0	0	0	0	0	0	0	0	0	0	0	0	0	0	0	0	0	0	0	0	0	7	3	0
ASV1165	Stramenopila	Heterokontophyta	Oomycetes	Pythiales	Pythiaceae	Pythium	Pythium oligandrum	0	0	0	0	0	0	0	0	0	0	0	0	0	0	0	0	0	0	0	0	0	0	0	0	0	0	0	0	0	0	0	0	0	0	0	0	0	0	0	0	0	0
ASV1166		Bacillariophyta	Bacillariophyceae	Surirellales	Surirellaceae	Surirella	Surirella sp. CCAP 1071/2	0	0	0	0	0	0	0	0	0	0	0	0	0	0	0	0	0	0	0	0	0	0	0	0	0	0	0	0	0	0	0	0	0	0	0	0	0	0	0	0	0	0
ASV1167	Fungi	'uncultured fungus'	'uncultured fungus'	'uncultured fungus'	'uncultured fungus'	'uncultured fungus'	uncultured fungus	0	0	0	0	0	0	0	193	0	0	0	0	0	0	0	0	0	0	0	0	0	0	0	0	0	0	0	0	0	0	0	0	0	0	0	0	0	0	0	0	0	0
ASV1168			Chrysophyceae	Chromulinales	Chromulinaceae	Spumella	Spumella sp.	0	0	0	0	0	0	0	0	0	0	0	0	0	0	0	0	0	0	0	0	0	0	0	0	0	0	0	0	0	0	0	0	0	0	0	0	0	55	0	0	0	0
ASV1169	Stramenopila	Heterokontophyta	Oomycetes	Pythiales	Pythiogetonaceae	Pythiogeton	Pythiogeton uniforme	0	0	0	0	0	0	0	0	0	0	0	0	0	0	0	0	0	0	0	0	0	0	0	0	0	0	0	0	0	0	0	0	0	0	0	0	0	0	0	0	0	0
ASV1170		Bacillariophyta	Bacillariophyceae	Naviculales	Naviculaceae	Navicula	Navicula trivialis	0	0	0	0	0	0	0	0	0	0	0	0	0	0	0	0	0	0	0	0	0	0	0	0	0	0	0	0	0	0	0	0	0	0	0	0	0	0	0	0	0	0
ASV1171	Metazoa	Chordata	Coelacanthimorpha	Coelacanthiformes	Coelacanthidae	Latimeria	Latimeria chalumnae	0	0	0	0	0	0	0	0	0	0	0	0	0	0	0	0	0	0	0	0	0	0	0	0	0	0	0	0	0	0	0	0	0	0	0	0	0	0	0	0	0	0
ASV1172	Stramenopila	Heterokontophyta	Oomycetes	Pythiales	Pythiogetonaceae	Pythiogeton	Pythiogeton uniforme	0	0	0	0	0	0	0	0	0	0	0	0	0	0	0	0	0	0	0	0	0	0	0	0	0	0	0	0	0	0	0	0	0	0	0	0	0	0	0	0	0	0
ASV1173	Stramenopila	Heterokontophyta	Oomycetes	Saprolegniales	Saprolegniaceae	Aphanomyces	Aphanomyces sp. 65	0	0	0	0	0	0	0	0	0	0	0	0	0	0	0	0	0	0	0	0	0	0	0	0	0	0	0	0	0	0	0	0	0	0	0	0	0	0	0	0	0	0
ASV1174	Viridiplantae	Streptophyta	Magnoliopsida	Myrtales	Myrtaceae	Syzygium	Syzygium oleosum	0	0	0	0	0	0	0	0	0	0	0	0	0	0	0	0	0	0	0	0	0	0	0	0	0	0	0	0	0	0	0	0	0	0	0	0	0	0	0	0	0	0
ASV1175		Bacillariophyta	Bacillariophyceae	Surirellales	Surirellaceae	Surirella	Surirella sp. CCAP 1071/2	0	0	0	0	0	0	0	0	0	0	0	0	0	0	0	0	0	0	0	0	0	0	0	0	191	0	0	0	0	0	0	0	0	0	0	0	0	0	0	0	0	0
ASV1176			Chrysophyceae			'Spumella-like'	Spumella-like flagellate JBC/S24	0	0	0	0	0	0	0	0	0	0	0	0	0	0	0	0	0	0	0	0	0	0	0	0	0	0	0	0	0	0	0	0	0	0	0	0	0	0	0	111	0	0
ASV1177			Chrysophyceae	Chromulinales	Chromulinaceae	Pedospumella	Pedospumella sp. JBM19	0	0	0	0	0	0	0	0	0	0	0	0	0	0	0	0	0	0	0	0	0	0	0	0	0	0	0	0	0	0	0	0	0	0	0	0	0	0	0	0	0	0
ASV1178			Dinophyceae	Prorocentrales	Prorocentraceae	Prorocentrum	Prorocentrum micans	0	0	0	0	0	0	0	0	0	0	0	0	0	0	0	0	0	0	0	0	0	0	0	0	0	0	0	0	0	0	0	0	0	0	0	0	0	0	0	0	0	0
ASV1179	Fungi	'uncultured fungus'	'uncultured fungus'	'uncultured fungus'	'uncultured fungus'	'uncultured fungus'	uncultured fungus	0	0	0	0	0	0	0	0	0	0	0	0	0	0	0	0	0	0	0	0	0	0	0	0	0	0	0	0	0	0	0	0	139	0	0	0	0	0	0	0	0	0
ASV1180	Fungi	'uncultured fungus'	'uncultured fungus'	'uncultured fungus'	'uncultured fungus'	'uncultured fungus'	uncultured fungus	0	0	83	33	0	0	0	0	0	0	0	0	0	0	5	0	27	0	0	0	0	0	0	0	0	0	0	0	0	0	0	0	0	0	0	0	0	0	0	0	0	0
ASV1181	Fungi	'uncultured fungus'	'uncultured fungus'	'uncultured fungus'	'uncultured fungus'	'uncultured fungus'	uncultured fungus	0	0	0	0	0	0	0	0	0	0	0	0	0	0	0	0	0	0	0	0	0	0	0	0	0	0	0	0	0	0	0	0	0	0	0	0	0	0	0	189	0	0
ASV1182	Stramenopila	Heterokontophyta	Oomycetes		Lagenaceae	Lagena	Lagena radicicola	0	0	0	0	0	0	0	0	0	0	0	0	0	0	0	0	0	0	0	0	0	0	0	0	0	0	0	0	0	0	0	0	0	0	0	0	0	0	0	0	0	0
ASV1183		'uncultured eukaryote'	'uncultured eukaryote'	'uncultured eukaryote'	'uncultured eukaryote'	'uncultured eukaryote'	uncultured eukaryote	0	0	0	0	0	0	0	0	0	41	0	0	0	0	0	0	0	0	0	0	0	0	0	0	0	0	0	0	0	0	0	0	0	0	0	0	27	0	0	0	0	0
ASV1184			Chrysophyceae	Chromulinales	Chromulinaceae	Spumella	Spumella rivalis	0	0	0	0	0	0	0	0	0	0	0	0	0	0	0	0	0	0	0	0	0	0	0	0	0	0	0	0	0	0	0	18	89	12	0	0	0	0	0	0	0	0
ASV1185	Stramenopila	Heterokontophyta	Oomycetes	Lagenidiales	Lagenidiaceae	Lagenidium	Lagenidium sp. SL10	0	0	0	0	0	0	0	0	0	0	0	0	63	0	0	0	0	0	0	0	0	0	0	0	0	0	0	0	0	0	0	0	126	0	0	0	0	0	0	0	0	0
ASV1186	Stramenopila	Heterokontophyta	Oomycetes	Pythiales	Pythiaceae	Pythium	Pythium attrantheridium	0	0	0	0	0	0	0	0	0	0	0	0	0	0	0	0	0	0	0	0	0	0	0	0	0	0	0	0	0	0	0	0	0	0	0	0	0	0	0	0	0	0
ASV1187			Chrysophyceae			'Spumella-like'	Spumella-like flagellate JBL14	0	0	0	0	0	0	0	0	0	0	0	0	0	0	0	0	0	0	0	0	0	0	0	0	11	0	0	0	0	0	0	0	0	0	0	0	0	0	0	0	0	0
ASV1188		Ciliophora	Oligohymenophorea	Hymenostomatida	Tetrahymenidae	Tetrahymena	Tetrahymena thermophila	0	0	0	0	0	0	0	0	0	0	0	0	0	0	0	0	0	0	0	0	0	0	29	0	0	0	0	0	0	0	0	0	0	0	0	0	0	0	0	0	0	0
ASV1189	Stramenopila	Heterokontophyta	Oomycetes	Pythiales	Pythiaceae	Pythium	Pythium violae	0	0	0	0	0	0	40	0	0	0	0	0	0	0	0	0	0	0	0	0	0	0	0	0	0	0	0	0	0	0	0	0	0	0	0	0	0	0	0	0	0	0
ASV1190	Stramenopila	Heterokontophyta	Oomycetes	Myzocytiopsidales	Myzocytiopsidaceae	Myzocytiopsis	Myzocytiopsis vermicola	31	52	0	0	0	0	0	0	0	0	0	0	0	0	0	0	0	0	0	0	0	0	0	0	0	0	0	0	0	0	0	0	0	0	0	0	0	0	0	0	0	0
ASV1191			Dinophyceae	Prorocentrales	Prorocentraceae	Prorocentrum	Prorocentrum micans	0	0	0	0	0	0	16	172	0	0	0	0	0	0	0	0	0	0	0	0	0	0	0	0	0	0	0	0	0	0	0	0	0	0	0	0	0	0	0	0	0	0
ASV1193	Fungi	'uncultured fungus'	'uncultured fungus'	'uncultured fungus'	'uncultured fungus'	'uncultured fungus'	uncultured fungus	0	0	0	0	0	0	0	0	0	0	0	0	0	0	0	0	0	0	0	0	0	0	0	0	0	0	0	0	0	0	0	0	0	0	0	0	0	0	0	0	0	0
ASV1194		Apicomplexa	Conoidasida	Eucoccidiorida	Cryptosporidiidae	Cryptosporidium	Cryptosporidium muris	0	0	0	0	0	0	0	0	0	0	0	0	0	0	0	0	0	0	0	0	0	0	0	0	0	0	0	0	0	0	0	0	0	0	0	0	0	0	0	0	0	0
ASV1195	Stramenopila	Heterokontophyta	Oomycetes	Pythiales	Pythiaceae	Pythium	Pythium oligandrum	0	0	0	0	0	0	0	67	0	0	0	0	0	86	0	0	0	0	0	0	0	0	0	0	0	0	34	0	0	0	0	0	0	0	0	0	0	0	0	0	0	0
ASV1196		Proteobacteria	Gammaproteobacteria	Enterobacterales	Morganellaceae	Proteus	Proteus vulgaris	0	0	0	0	0	0	0	0	0	0	0	0	0	0	0	0	0	0	0	0	0	0	0	0	0	0	0	0	0	0	0	0	187	0	0	0	0	0	0	0	0	0
ASV1197	Stramenopila	Heterokontophyta	Oomycetes	Pythiales	Pythiaceae	Pythium	Pythium heterothallicum	0	0	0	0	0	0	0	0	0	0	0	0	0	0	0	0	0	0	0	0	0	0	0	0	0	0	0	0	0	0	0	0	0	0	0	0	0	0	0	0	0	0
ASV1198			Dinophyceae	Prorocentrales	Prorocentraceae	Prorocentrum	Prorocentrum micans	0	0	0	0	0	0	0	0	0	0	0	0	0	0	0	0	0	0	0	0	0	0	0	0	0	0	0	0	0	0	0	0	0	0	0	0	0	0	0	0	0	0
ASV1199		'uncultured eukaryote'	'uncultured eukaryote'	'uncultured eukaryote'	'uncultured eukaryote'	'uncultured eukaryote'	uncultured eukaryote	0	0	0	0	0	0	0	0	0	0	0	0	0	0	0	0	0	0	0	0	0	0	0	0	0	0	0	0	0	0	0	0	0	0	0	0	0	0	0	0	0	0
ASV1200	Stramenopila	Heterokontophyta	Oomycetes	Peronosporales	Peronosporaceae	Hyaloperonospora	Hyaloperonospora cochleariae	0	0	0	0	0	0	0	0	0	0	0	0	0	0	0	0	0	0	0	0	0	0	0	0	0	0	0	0	0	0	0	0	7	0	0	0	0	0	0	0	0	0
ASV1201			Chrysophyceae	Chromulinales	Chromulinaceae	'Spumella-like'	Spumella-like flagellate 391f	0	0	0	0	0	0	0	0	0	0	0	0	0	0	0	0	0	0	0	0	0	0	0	0	0	0	0	0	24	0	0	2	29	0	0	0	0	0	0	0	0	0
ASV1202			Dinophyceae	Prorocentrales	Prorocentraceae	Prorocentrum	Prorocentrum micans	0	0	0	0	0	0	0	0	90	0	0	0	0	0	0	0	0	0	0	0	0	0	0	0	0	0	0	0	0	0	0	0	0	0	0	0	0	0	0	0	0	0
ASV1203	Stramenopila	Heterokontophyta	Oomycetes			Haptoglossa	Haptoglossa zoospora	0	0	0	0	0	0	0	0	0	0	0	0	0	0	0	0	0	0	0	0	0	0	0	0	0	0	0	110	0	0	0	0	0	0	0	0	0	0	0	0	0	0
ASV1204	Stramenopila	Heterokontophyta	Oomycetes	Pythiales	Pythiaceae	Globisporangium	Globisporangium intermedium	0	186	0	0	0	0	0	0	0	0	0	0	0	0	0	0	0	0	0	0	0	0	0	0	0	0	0	0	0	0	0	0	0	0	0	0	0	0	0	0	0	0
ASV1205	Stramenopila	Heterokontophyta	Oomycetes	Pythiales	Pythiaceae	Pythium	Pythium polymastum	0	0	0	0	0	0	0	0	0	0	0	0	0	0	0	0	0	0	0	0	0	0	0	0	0	0	0	0	0	0	0	0	0	0	0	0	0	0	0	0	0	0
ASV1206			Chrysophyceae	Chromulinales	Chromulinaceae	'Spumella-like'	Spumella-like flagellate 1006	0	0	0	0	0	0	0	0	0	0	0	0	0	0	0	0	0	0	0	0	0	0	0	0	0	0	0	0	0	0	0	0	0	0	0	0	0	0	0	0	0	0
ASV1207	Viridiplantae	Streptophyta	Magnoliopsida	Brassicales	Brassicaceae	Arabis	Arabis alpina	0	0	0	0	0	0	0	0	0	0	0	0	0	0	0	0	0	0	0	0	0	0	0	0	0	0	0	0	0	0	0	0	0	0	0	0	0	0	0	0	0	0
ASV1208			Chrysophyceae			'Spumella-like'	Spumella-like flagellate JBL14	0	0	0	0	0	0	0	0	0	0	0	0	0	0	0	0	0	0	0	0	0	18	0	0	0	12	0	0	8	0	0	0	0	0	0	0	0	0	0	0	0	0
ASV1209	Stramenopila	Heterokontophyta	Oomycetes	Peronosporales	Peronosporaceae	Phytophthora	Phytophthora pseudosyringae	0	0	0	0	0	0	0	0	0	0	0	0	0	0	0	0	0	0	0	0	0	0	0	0	0	0	0	0	0	0	0	0	0	0	0	0	0	0	0	0	0	0
ASV1210		Ciliophora	Oligohymenophorea	Hymenostomatida	Tetrahymenidae	Tetrahymena	Tetrahymena thermophila	0	0	0	0	0	0	0	0	0	0	0	0	0	0	0	0	0	0	0	0	0	0	29	0	0	0	0	0	0	0	0	0	0	0	0	0	0	0	0	0	0	0
ASV1211	Metazoa	Arthropoda	Hexanauplia	Siphonostomatoida	Caligidae	Caligus	Caligus rogercresseyi	0	0	0	0	0	0	0	0	0	0	0	0	0	0	0	0	0	0	0	0	0	0	0	0	0	0	0	0	0	0	0	0	0	0	0	0	0	0	0	0	0	0
ASV1212	Stramenopila	Heterokontophyta	Oomycetes	Pythiales	Pythiaceae	Pythium	Pythium sp. FL-2016f	0	0	0	0	0	0	0	0	0	0	0	0	0	0	0	0	0	0	0	0	0	0	0	0	0	0	0	0	0	0	0	0	0	0	0	0	0	0	0	0	0	0
ASV1213	Stramenopila	Heterokontophyta	Oomycetes	Pythiales	Pythiogetonaceae	Pythiogeton	Pythiogeton uniforme	0	0	0	0	0	0	0	0	0	0	0	0	0	0	0	0	0	0	0	0	0	0	0	0	0	0	0	0	0	0	0	0	0	0	0	0	0	0	0	0	0	0
ASV1214	Stramenopila	Heterokontophyta	Oomycetes	Pythiales	Pythiaceae	Pythium	Pythium junctum	0	0	0	0	0	0	0	0	0	0	0	0	0	0	71	0	111	0	0	0	0	0	0	0	0	0	0	0	0	0	0	0	0	0	0	0	0	0	0	0	0	0
ASV1215	Viridiplantae	Streptophyta	Magnoliopsida	Malpighiales	Salicaceae	Populus	Populus trichocarpa	0	0	0	0	0	0	0	0	0	0	0	0	0	0	0	0	0	0	0	0	0	0	0	0	0	0	0	0	0	0	0	71	111	0	0	0	0	0	0	0	0	0
ASV1216	Metazoa	Chordata	Actinopteri	Salmoniformes	Salmonidae	Coregonus	Coregonus sp. 'balchen'	0	0	0	0	0	0	0	0	0	0	0	0	0	0	0	0	0	0	0	0	0	0	0	0	0	0	0	0	0	0	0	0	0	0	0	0	0	0	0	0	0	0
ASV1217	Stramenopila	Heterokontophyta	Oomycetes	Pythiales	Pythiaceae	Pythium	Pythium pachycaule	0	0	0	0	0	0	0	0	0	0	0	0	0	0	0	0	0	0	0	0	0	0	0	0	0	0	0	0	0	0	0	0	0	0	0	0	0	0	0	0	0	0
ASV1218			Chrysophyceae	Chromulinales	Chromulinaceae	'Spumella-like'	Spumella-like flagellate 391f	0	0	0	0	0	0	0	0	0	0	0	0	0	0	0	0	0	0	0	0	0	60	16	0	12	0	0	0	0	0	0	0	0	0	0	0	0	0	0	0	0	0
ASV1219	Stramenopila	Heterokontophyta	Oomycetes	Pythiales	Pythiaceae	Pythium	Pythium okanoganense	0	0	0	0	0	0	0	0	112	0	0	0	0	0	0	0	0	0	0	0	0	0	0	0	0	0	0	0	0	0	0	0	0	0	0	0	0	0	0	0	0	0
ASV1220			Chrysophyceae	Chromulinales	Chromulinaceae	Spumella	Spumella sp.	0	0	0	0	0	0	0	0	0	0	0	0	0	0	0	0	0	0	0	0	0	0	0	0	0	0	0	0	0	0	0	0	0	0	0	0	0	4	0	0	0	0
ASV1221	Stramenopila	Heterokontophyta	Oomycetes	Lagenidiales	Lagenidiaceae	Lagenidium	Lagenidium sp. SLG-2014b	0	0	0	0	0	0	0	0	0	0	0	0	0	0	0	0	0	0	0	0	0	0	0	0	0	0	0	0	0	0	0	0	0	0	0	0	0	0	0	0	0	0
ASV1222	Stramenopila	Heterokontophyta	Oomycetes	Lagenidiales	Lagenidiaceae	Lagenidium	Lagenidium sp. SLG-2014b	0	0	0	0	0	0	0	0	180	0	0	0	0	0	0	0	0	0	0	0	0	0	0	0	0	0	0	0	0	0	0	0	0	0	0	0	0	0	0	0	0	0
ASV1223	Stramenopila	Heterokontophyta	Oomycetes	Pythiales	Pythiaceae	Pythium	Pythium sp. AL-2010	0	0	0	0	0	0	0	0	0	0	0	0	0	0	37	0	143	0	0	0	0	0	0	0	0	0	0	0	0	0	0	0	0	0	0	0	0	0	0	0	0	0
ASV1224	Viridiplantae	Streptophyta	Magnoliopsida	Brassicales	Brassicaceae	Arabidopsis	Arabidopsis thaliana	0	0	0	0	0	0	0	0	0	0	0	0	0	0	0	0	0	0	0	0	0	180	0	0	0	0	0	0	0	0	0	0	0	0	0	0	0	0	0	0	0	0
ASV1225	Stramenopila	Heterokontophyta	Oomycetes	Pythiales	Pythiaceae	Pythium	Pythium polymastum	0	0	0	0	0	0	0	0	0	0	0	0	0	0	0	0	0	0	0	0	0	0	0	0	0	0	0	0	0	0	0	0	0	0	0	0	0	0	0	0	0	0
ASV1226		'uncultured eukaryote'	'uncultured eukaryote'	'uncultured eukaryote'	'uncultured eukaryote'	'uncultured eukaryote'	uncultured eukaryote	0	0	0	0	0	0	0	0	0	0	0	0	0	0	0	0	0	0	0	0	0	0	0	0	0	0	0	0	0	0	0	0	0	0	0	0	0	0	0	0	0	0
ASV1227	Fungi	'uncultured fungus'	'uncultured fungus'	'uncultured fungus'	'uncultured fungus'	'uncultured fungus'	uncultured fungus	0	0	0	0	0	0	0	0	0	13	0	0	0	10	0	0	0	0	0	0	0	0	0	0	0	0	0	0	0	0	0	0	0	0	0	0	0	12	0	0	0	0
ASV1228	Stramenopila	Heterokontophyta	Oomycetes	Saprolegniales	Saprolegniaceae	Achlya	Achlya bisexualis	0	0	0	0	0	0	0	0	0	0	0	0	0	179	0	0	0	0	0	0	0	0	0	0	0	0	0	0	0	0	0	0	0	0	0	0	0	0	0	0	0	0
ASV1229	Metazoa	Arthropoda	Insecta	Diptera	Ceratopogonidae	Culicoides	Culicoides sonorensis	0	0	0	0	0	0	0	0	0	0	0	0	0	0	0	0	0	0	0	0	0	0	0	0	0	0	0	0	0	0	0	0	0	0	0	0	0	0	0	178	0	0
ASV1230	Stramenopila	Heterokontophyta	Oomycetes	Pythiales	Pythiaceae	Pythium	Pythium sp. CAL-2011f	0	0	0	0	0	0	0	0	0	0	0	0	0	0	0	0	0	0	0	0	0	0	0	0	0	0	0	0	0	0	0	0	0	0	0	0	0	0	0	0	0	85
ASV1231	Stramenopila	Heterokontophyta	Oomycetes	Pythiales	Pythiaceae	Pythium	Pythium insidiosum	0	0	0	0	0	0	0	0	0	0	0	0	0	0	0	0	0	0	0	0	0	0	0	0	0	0	0	0	0	0	0	0	0	0	0	0	0	0	0	0	0	0
ASV1232	Fungi	'uncultured fungus'	'uncultured fungus'	'uncultured fungus'	'uncultured fungus'	'uncultured fungus'	uncultured fungus	0	0	0	0	0	0	0	0	0	0	0	0	0	0	0	0	0	0	0	0	0	0	0	0	0	0	0	0	0	0	0	0	0	0	0	0	0	0	0	0	0	0
ASV1233	Stramenopila	Heterokontophyta	Oomycetes	Pythiales	Pythiaceae	Pythium	Pythium sp. C73	0	0	0	0	0	0	0	0	0	0	0	0	0	0	62	0	0	0	0	0	0	0	0	0	0	0	0	0	0	0	0	0	0	0	0	0	0	0	0	0	0	0
ASV1234		Bacillariophyta	Bacillariophyceae	Surirellales	Surirellaceae	Surirella	Surirella sp. CCAP 1071/2	0	0	0	0	0	0	0	178	0	0	0	0	0	0	0	0	0	0	0	0	0	0	0	0	0	0	0	0	0	0	0	0	0	0	0	0	0	0	0	0	0	0
ASV1235	Metazoa	Chordata	Actinopteri	Perciformes	Bovichtidae	Cottoperca	Cottoperca gobio	0	0	0	0	0	0	0	0	0	0	0	0	0	0	0	0	0	0	0	0	0	0	0	0	0	0	0	0	0	0	0	0	0	0	0	0	0	0	0	0	0	0
ASV1236	Stramenopila	Heterokontophyta	Oomycetes	Pythiales	Pythiogetonaceae	Pythiogeton	Pythiogeton uniforme	0	0	0	0	0	0	0	0	0	0	0	0	0	0	0	0	0	0	0	0	0	0	0	0	0	0	0	0	0	0	0	0	0	0	0	0	0	0	0	0	0	0
ASV1237			Dinophyceae	Prorocentrales	Prorocentraceae	Prorocentrum	Prorocentrum micans	0	0	0	0	0	0	0	0	0	0	0	0	0	0	0	0	0	0	0	0	0	0	0	0	0	0	0	0	0	0	0	0	0	0	0	0	0	0	0	0	0	0
ASV1238	Stramenopila	Heterokontophyta	Oomycetes	Pythiales	Pythiaceae	Globisporangium	Globisporangium ultimum	0	0	0	0	0	25	0	0	0	0	0	0	0	0	0	0	0	0	0	0	0	0	0	0	0	0	0	0	0	0	0	0	0	0	0	0	0	0	0	0	0	0
ASV1239		Ciliophora	Oligohymenophorea	Hymenostomatida	Tetrahymenidae	Tetrahymena	Tetrahymena thermophila	0	0	0	0	0	0	0	0	0	0	0	0	0	0	0	0	0	0	0	0	0	28	76	0	0	0	0	0	0	0	0	0	0	0	0	0	0	0	0	0	0	0
ASV1240		Bacillariophyta	Bacillariophyceae	Surirellales	Surirellaceae	Surirella	Surirella sp. CCAP 1071/2	0	0	0	0	0	0	0	177	0	0	0	0	0	0	0	0	0	0	0	0	0	0	0	0	0	0	0	0	0	0	0	0	0	0	0	0	0	0	0	0	0	0
ASV1241			Chrysophyceae			'Spumella-like'	Spumella-like flagellate JBL14	0	0	0	0	0	0	0	0	0	0	0	0	0	0	0	0	0	0	0	0	0	0	0	0	0	0	0	0	0	0	0	0	0	0	0	0	0	0	0	0	0	0
ASV1242	Fungi	'uncultured fungus'	'uncultured fungus'	'uncultured fungus'	'uncultured fungus'	'uncultured fungus'	uncultured fungus	0	0	0	0	0	0	0	0	0	0	0	0	0	0	0	0	0	0	0	0	0	0	0	0	0	0	0	0	0	0	0	0	0	0	0	0	0	0	0	0	0	0
ASV1243	Stramenopila	Heterokontophyta	Oomycetes	Pythiales	Pythiaceae	Pythium	Pythium polymastum	0	0	0	0	0	0	0	0	66	0	0	0	0	0	0	0	0	0	0	0	0	0	0	0	0	0	0	0	0	0	0	0	0	0	0	0	0	0	0	0	87	0
ASV1244	Metazoa	Chordata	Actinopteri	Anabantiformes	Anabantidae	Anabas	Anabas testudineus	0	0	0	0	0	0	0	0	0	0	176	0	0	0	0	0	0	0	0	0	0	0	0	0	0	0	0	0	0	0	0	0	0	0	0	0	0	0	0	0	0	0
ASV1245			Chrysophyceae	Chromulinales	Chromulinaceae	'Spumella-like'	Spumella-like flagellate Got220	0	0	0	0	0	0	0	0	0	0	0	0	0	0	0	0	0	0	0	0	0	0	0	0	0	0	176	0	0	0	0	0	0	0	0	0	0	0	0	0	0	0
ASV1246	Stramenopila	Heterokontophyta	Oomycetes	Saprolegniales	Saprolegniaceae	Aphanomyces	Aphanomyces sp.	0	0	0	0	0	0	0	0	0	0	0	0	0	0	0	0	0	0	0	0	0	0	0	0	0	0	0	0	0	0	0	0	0	0	0	0	0	0	0	0	0	0
ASV1247	Viridiplantae	Streptophyta	Magnoliopsida	Malpighiales	Salicaceae	Populus	Populus trichocarpa	0	0	0	0	0	0	0	0	0	0	0	0	0	0	0	0	0	0	0	0	0	0	0	0	0	0	0	0	0	0	0	0	0	0	0	0	0	0	0	0	0	0
ASV1248			Chrysophyceae	Chromulinales	Chromulinaceae	'Spumella-like'	Spumella-like flagellate 391f	0	0	0	0	0	0	0	0	0	0	0	0	0	22	0	0	0	0	0	0	0	0	12	0	0	0	0	0	0	0	0	0	0	38	0	0	0	0	0	0	0	0
ASV1249			Chrysophyceae			'Spumella-like'	Spumella-like flagellate JBNZ39	0	0	0	0	0	0	0	0	0	0	0	0	0	0	0	0	0	0	0	0	0	0	0	0	21	34	0	0	0	0	0	0	0	0	0	0	0	0	0	34	0	0
ASV1250			Chrysophyceae	Chromulinales	Chromulinaceae	'Spumella-like'	Spumella-like flagellate Got220	0	0	60	0	0	0	0	0	0	0	0	0	0	0	0	0	0	0	0	0	0	0	0	0	0	0	0	0	0	0	0	0	0	0	0	0	115	0	0	0	0	0
ASV1251	Metazoa	Chordata	Actinopteri	Salmoniformes	Salmonidae	Salmo	Salmo trutta	0	0	0	0	0	0	0	0	0	0	0	0	0	0	0	0	0	0	0	0	0	0	0	0	0	0	0	0	0	0	0	0	0	0	0	0	0	0	0	0	0	0
ASV1252	Fungi	'uncultured fungus'	'uncultured fungus'	'uncultured fungus'	'uncultured fungus'	'uncultured fungus'	uncultured fungus	0	0	0	0	0	0	0	0	0	0	0	0	0	0	0	0	0	0	0	0	0	0	0	0	0	0	0	0	0	0	0	0	0	0	0	0	0	0	0	0	0	0
ASV1253	Fungi	'uncultured fungus'	'uncultured fungus'	'uncultured fungus'	'uncultured fungus'	'uncultured fungus'	uncultured fungus	0	0	0	0	0	0	0	0	0	0	0	0	0	0	0	0	0	0	0	0	0	0	0	0	0	0	0	0	0	0	0	0	0	0	0	0	0	0	0	0	0	0
ASV1254	Stramenopila	Heterokontophyta	Oomycetes	Pythiales	Pythiaceae	Pythium	Pythium pleroticum	0	0	0	0	0	0	0	0	0	0	0	0	0	0	0	0	0	0	0	0	0	0	0	0	0	0	0	0	0	0	0	0	0	0	0	0	0	0	0	0	0	0
ASV1255	Fungi	'uncultured fungus'	'uncultured fungus'	'uncultured fungus'	'uncultured fungus'	'uncultured fungus'	uncultured fungus	0	0	0	3	0	0	0	0	0	0	0	0	0	0	0	0	0	0	0	0	0	0	0	0	0	0	0	0	0	0	0	0	0	0	0	0	0	0	63	0	0	0
ASV1256	Stramenopila	Heterokontophyta	Oomycetes	Pythiales	Pythiogetonaceae	Pythiogeton	Pythiogeton uniforme	0	0	0	0	0	0	0	0	0	0	0	0	0	0	0	0	0	0	0	0	0	0	0	0	0	0	0	0	0	0	0	0	0	0	0	43	0	0	0	0	0	0
ASV1257	Stramenopila	Heterokontophyta	Oomycetes	Peronosporales	Peronosporaceae	Phytophthora	Phytophthora undulata	0	0	0	0	0	0	0	0	0	0	0	0	0	0	0	0	0	0	0	0	0	0	0	0	0	0	0	0	0	0	0	0	0	0	0	0	161	0	0	0	0	0
ASV1258	Stramenopila	Heterokontophyta	Oomycetes	Pythiales	Pythiaceae	Pythium	Pythium sp. F-1517.1	0	0	0	0	0	0	0	0	0	0	0	0	0	0	0	0	0	0	0	0	0	0	0	0	0	0	0	0	0	0	0	0	0	0	0	0	0	0	0	0	0	0
ASV1259			Chrysophyceae	Chromulinales	Chromulinaceae	Spumella	Spumella sp.	0	0	0	0	0	0	0	0	0	0	0	0	0	0	0	0	0	0	0	0	0	0	0	0	0	0	0	0	0	0	0	0	0	0	0	0	0	0	0	0	0	0
ASV1260			Chrysophyceae	Chromulinales	Chromulinaceae	Pedospumella	Pedospumella encystans	0	0	0	0	0	0	0	0	0	0	0	0	0	0	0	0	0	0	0	0	0	0	0	0	0	0	0	0	0	0	0	0	0	0	0	0	0	0	0	0	0	0
ASV1261		Bacillariophyta	Bacillariophyceae	Surirellales	Surirellaceae	Surirella	Surirella sp. CCAP 1071/2	0	0	0	0	0	0	0	173	0	0	0	0	0	0	0	0	0	0	0	0	0	0	0	0	0	0	0	0	0	0	0	0	0	0	0	0	0	0	0	0	0	0
ASV1262			Chrysophyceae			Segregatospumella	Segregatospumella sp.	0	0	0	0	0	0	0	0	0	0	0	0	0	0	0	0	0	0	0	0	0	0	0	0	0	0	0	0	0	0	0	0	0	0	0	71	101	0	0	0	0	0
ASV1263	Fungi	'uncultured fungus'	'uncultured fungus'	'uncultured fungus'	'uncultured fungus'	'uncultured fungus'	uncultured fungus	0	0	0	0	0	0	0	0	0	0	0	0	0	0	0	0	0	0	0	0	0	0	0	0	0	0	0	0	0	0	0	0	0	0	0	0	0	0	0	30	56	0
ASV1264			Chrysophyceae	Chromulinales	Chromulinaceae	'Spumella-like'	Spumella-like flagellate 1006	0	0	0	0	0	0	0	0	0	0	0	0	0	0	0	0	0	0	0	0	0	0	0	0	0	0	0	0	0	0	0	0	0	0	0	0	0	0	0	0	0	0
ASV1265	Stramenopila	Heterokontophyta	Oomycetes	Pythiales	Pythiaceae	Pythium	Pythium camurandrum	0	0	0	0	0	0	0	0	0	0	0	0	0	0	0	0	0	0	0	0	0	0	0	0	0	0	0	0	0	0	0	0	0	0	0	0	0	0	0	0	0	0
ASV1266	Metazoa	Platyhelminthes	Cestoda	Diphyllobothriidea	Diphyllobothriidae	Spirometra	Spirometra erinaceieuropaei	0	0	0	0	0	0	0	0	0	0	0	0	0	0	0	0	0	0	0	0	0	0	0	0	0	0	0	0	0	0	0	0	0	0	0	0	0	0	0	0	0	0
ASV1267	Stramenopila	Heterokontophyta	Oomycetes	Pythiales	Pythiaceae	Pythium	Pythium heterothallicum	0	0	0	0	0	0	0	0	0	0	0	0	0	0	0	0	0	0	0	0	0	0	0	0	0	0	0	71	0	0	0	0	0	0	0	0	0	0	0	0	0	0
ASV1268		Ciliophora	Oligohymenophorea	Hymenostomatida	Tetrahymenidae	Tetrahymena	Tetrahymena thermophila	0	0	0	0	0	0	0	0	0	0	0	0	0	0	0	0	0	0	0	0	0	51	49	0	0	0	0	0	0	0	0	0	0	0	0	0	0	0	0	0	0	0
ASV1269	Stramenopila	Heterokontophyta	Oomycetes	Saprolegniales	Saprolegniaceae	Saprolegnia	Saprolegnia delica	0	0	0	0	0	0	0	106	0	0	0	0	0	0	0	0	0	0	0	0	0	0	0	13	0	0	0	0	0	0	0	0	0	0	0	0	0	0	0	0	0	0
ASV1270	Stramenopila	Heterokontophyta	Oomycetes	Pythiales	Pythiaceae	Pythium	Pythium rostratum	0	0	0	0	0	0	0	0	0	0	0	0	0	0	0	0	0	0	0	0	0	0	0	0	0	0	0	0	0	0	0	0	0	0	0	0	0	0	171	0	0	0
ASV1271	Stramenopila	Heterokontophyta	Oomycetes	Pythiales	Pythiaceae	Globisporangium	Globisporangium intermedium	0	0	0	0	0	0	0	0	0	0	0	0	0	0	0	0	171	0	0	0	0	0	0	0	0	0	0	0	0	0	0	0	0	0	0	0	0	0	0	0	0	0
ASV1272	Stramenopila	Heterokontophyta	Oomycetes		Lagenaceae	Lagena	Lagena radicicola	0	0	0	0	0	0	0	0	0	0	0	0	0	0	0	0	0	0	0	0	0	0	0	0	0	0	0	0	0	0	0	0	0	0	0	0	0	0	0	0	0	0
ASV1273			Chrysophyceae			'Spumella-like'	Spumella-like flagellate JBC/S24	0	0	0	0	0	0	0	0	0	0	46	0	0	0	0	0	0	0	0	0	0	0	0	0	0	0	0	0	0	0	0	0	0	0	0	0	0	0	0	0	0	0
ASV1274	Stramenopila	Heterokontophyta	Oomycetes	Pythiales	Pythiaceae	Pythium	Pythium sp.	0	0	0	0	0	0	0	0	0	0	0	0	0	0	0	0	0	0	0	0	0	0	0	0	0	0	0	0	0	0	0	0	0	0	0	0	0	0	0	0	0	0
ASV1275	Stramenopila	Heterokontophyta	Oomycetes	Pythiales	Pythiaceae	Pythium	Pythium okanoganense	0	0	0	0	0	0	0	0	0	0	0	0	0	0	0	0	0	0	0	0	0	0	0	0	0	0	0	0	0	0	0	0	0	0	0	0	0	0	0	0	0	0
ASV1276	Stramenopila	Heterokontophyta	Oomycetes	Pythiales	Pythiogetonaceae	Pythiogeton	Pythiogeton uniforme	0	0	0	0	0	0	0	0	0	0	0	0	0	0	0	0	0	0	0	0	0	0	0	0	0	0	0	0	0	0	0	0	0	0	0	0	0	0	0	0	0	0
ASV1277	Stramenopila	Heterokontophyta	Oomycetes	Pythiales	Pythiaceae	Globisporangium	Globisporangium intermedium	0	0	0	0	0	0	0	0	0	0	0	0	0	0	0	0	0	0	0	0	0	0	0	0	0	0	0	0	0	0	0	0	0	0	0	0	0	0	0	0	0	0
ASV1278	Stramenopila	Heterokontophyta	Oomycetes	Pythiales	Pythiaceae	Pythium	Pythium anandrum	0	0	0	0	0	0	0	0	0	0	0	0	0	0	0	0	0	0	0	0	0	0	0	0	0	14	0	0	0	0	0	0	0	0	73	0	0	0	0	0	0	0
ASV1279	Stramenopila	Heterokontophyta	Oomycetes	Lagenidiales	Lagenidiaceae	Lagenidium	Lagenidium sp. SLG-2014b	0	0	0	0	0	0	0	0	0	169	0	0	0	0	0	0	0	0	0	0	0	0	0	0	0	0	0	0	0	0	0	0	0	0	0	0	0	0	0	0	0	0
ASV1280	Stramenopila	Heterokontophyta	Oomycetes	Saprolegniales	Saprolegniaceae	Achlya	Achlya bisexualis	0	0	0	0	0	0	0	0	0	0	0	0	0	169	0	0	0	0	0	0	0	0	0	0	0	0	0	0	0	0	0	0	0	0	0	0	0	0	0	0	0	0
ASV1281	Stramenopila	Heterokontophyta	Oomycetes	Leptomitales		Apodachlya	Apodachlya minima	0	0	0	0	0	0	0	0	0	0	0	0	0	0	0	0	0	0	0	0	0	0	0	0	0	0	0	0	0	0	0	0	0	0	0	0	0	0	0	0	0	0
ASV1282	Stramenopila	Heterokontophyta	Oomycetes	Albuginales	Albuginaceae	Wilsoniana	Wilsoniana amaranthi	0	0	0	0	0	0	0	0	0	0	0	0	0	0	0	0	0	0	0	0	0	0	0	0	0	0	0	0	0	0	0	0	0	0	0	0	0	0	0	0	0	0
ASV1283	Stramenopila	Heterokontophyta	Oomycetes	Pythiales	Pythiaceae	Pythium	Pythium pleroticum	0	0	0	0	0	0	0	0	0	0	0	0	0	0	0	0	0	0	0	0	0	0	0	0	0	0	0	0	0	0	0	0	0	0	0	0	0	0	0	0	0	0
ASV1284	Stramenopila	Heterokontophyta	Oomycetes	Pythiales	Pythiaceae	Pythium	Pythium pachycaule	0	0	0	0	0	0	0	0	0	0	0	0	0	0	0	0	0	0	0	0	0	0	0	0	0	0	0	0	0	0	0	0	0	0	0	0	0	0	0	0	0	0
ASV1285			Chrysophyceae	Chromulinales	Chromulinaceae	'Spumella-like'	Spumella-like flagellate 1031	0	0	0	0	0	0	0	0	0	0	0	0	0	0	0	0	0	0	0	0	0	0	0	0	0	47	0	0	52	0	0	0	13	12	0	0	0	0	0	0	0	0
ASV1286	Metazoa	Chordata	Actinopteri		Sciaenidae	Larimichthys	Larimichthys crocea	0	0	25	21	0	0	0	0	0	0	0	0	0	0	0	122	0	0	0	0	0	0	0	0	0	0	0	0	0	0	0	0	0	0	0	0	0	0	0	0	0	0
ASV1287	Stramenopila	Heterokontophyta	Oomycetes	Pythiales	Pythiaceae	Pythium	Pythium kandovanense	0	0	0	0	0	0	43	0	0	0	0	0	0	0	0	0	0	0	0	0	0	0	0	0	0	0	0	0	125	0	0	0	0	0	0	0	0	0	0	0	0	0
ASV1288		Bacillariophyta	Bacillariophyceae	Naviculales	Naviculaceae	Navicula	Navicula trivialis	0	0	0	0	0	0	0	0	125	0	0	0	0	0	0	0	0	0	0	0	0	0	0	0	0	0	0	0	43	0	0	0	0	0	0	0	0	0	0	0	0	0
ASV1289	Fungi	'uncultured fungus'	'uncultured fungus'	'uncultured fungus'	'uncultured fungus'	'uncultured fungus'	uncultured fungus	0	0	0	0	0	0	0	0	0	0	0	0	0	0	0	0	0	0	0	0	0	0	0	0	0	0	0	0	0	0	0	0	0	0	0	0	0	0	0	0	0	0
ASV1290			Chrysophyceae			Segregatospumella	Segregatospumella sp.	0	0	0	0	0	0	0	0	0	0	0	0	0	0	0	0	0	0	0	0	0	0	0	0	0	0	0	0	0	0	0	0	0	0	0	0	0	0	0	0	0	0
ASV1291	Fungi	'uncultured fungus'	'uncultured fungus'	'uncultured fungus'	'uncultured fungus'	'uncultured fungus'	uncultured fungus	0	0	0	0	0	0	0	0	0	0	0	0	0	0	0	0	0	0	0	0	0	0	0	0	0	15	0	0	0	0	0	0	0	0	0	0	0	0	0	0	0	0
ASV1292			Chrysophyceae	Chromulinales	Chromulinaceae	Spumella	Spumella rivalis	0	0	0	0	0	0	0	0	0	0	40	0	0	0	0	0	0	0	0	0	0	0	0	0	0	0	0	0	0	0	0	0	0	0	0	0	0	0	0	0	0	0
ASV1293	Stramenopila	Heterokontophyta	Oomycetes	Pythiales	Pythiaceae	Pythium	Pythium camurandrum	0	0	0	0	23	0	144	0	0	0	0	0	0	0	0	0	0	0	0	0	0	0	0	0	0	0	0	0	0	0	0	0	0	0	0	0	0	0	0	0	0	0
ASV1294		Bacillariophyta	Bacillariophyceae	Surirellales	Surirellaceae	Surirella	Surirella sp. CCAP 1071/2	0	0	0	0	0	0	0	0	0	167	0	0	0	0	0	0	0	0	0	0	0	0	0	0	0	0	0	0	0	0	0	0	0	0	0	0	0	0	0	0	0	0
ASV1295	Stramenopila	Heterokontophyta	Oomycetes	Saprolegniales	Saprolegniaceae	Geolegnia	Geolegnia helicoides	0	0	0	0	0	0	0	0	0	0	0	0	0	0	0	167	0	0	0	0	0	0	0	0	0	0	0	0	0	0	0	0	0	0	0	0	0	0	0	0	0	0
ASV1296			Chrysophyceae			'Spumella-like'	Spumella-like flagellate JBC/S24	0	0	0	0	0	0	0	0	0	0	0	0	9	109	0	0	0	0	0	0	0	0	0	0	0	0	0	0	0	0	0	0	0	0	0	0	0	0	0	0	0	0
ASV1297		'uncultured eukaryote'	'uncultured eukaryote'	'uncultured eukaryote'	'uncultured eukaryote'	'uncultured eukaryote'	uncultured eukaryote	0	0	0	0	0	0	0	0	0	0	0	0	0	0	0	0	0	0	0	0	0	0	0	0	0	0	0	0	0	0	0	0	0	0	0	91	0	0	0	0	0	0
ASV1298	Stramenopila	Heterokontophyta	Oomycetes	Leptomitales		Apodachlya	Apodachlya brachynema	0	0	0	0	0	0	0	0	0	0	0	0	0	0	0	0	0	0	0	0	0	0	0	0	0	0	0	0	0	0	0	0	0	0	0	0	0	0	0	0	0	0
ASV1299			Chrysophyceae	Chromulinales	Chromulinaceae	Spumella	Spumella sp.	0	0	0	0	0	0	0	0	0	0	0	0	0	0	0	0	0	0	0	0	0	0	0	0	0	0	0	0	0	0	0	0	0	0	0	0	0	0	0	0	0	0
ASV1300	Stramenopila	Heterokontophyta	Oomycetes	Saprolegniales	Saprolegniaceae	Saprolegnia	Saprolegnia bulbosa	0	0	0	0	0	0	0	0	0	0	0	0	0	0	0	0	0	0	0	0	0	0	0	0	0	0	0	0	0	0	0	0	0	0	0	0	0	0	0	0	0	0
ASV1301	Fungi	'uncultured fungus'	'uncultured fungus'	'uncultured fungus'	'uncultured fungus'	'uncultured fungus'	uncultured fungus	0	0	0	0	0	0	0	0	0	0	0	0	0	0	0	0	0	0	0	0	0	0	0	0	0	0	0	0	0	0	0	0	0	0	0	0	0	0	0	0	0	0
ASV1302	Fungi	'uncultured fungus'	'uncultured fungus'	'uncultured fungus'	'uncultured fungus'	'uncultured fungus'	uncultured fungus	0	0	0	0	0	0	0	0	0	0	0	0	0	0	6	0	0	0	0	0	0	0	0	0	0	0	0	0	0	0	0	0	0	0	0	88	71	0	0	0	0	0
ASV1303			Dinophyceae	Prorocentrales	Prorocentraceae	Prorocentrum	Prorocentrum micans	16	0	0	0	0	0	0	0	0	0	0	0	0	0	0	0	0	0	0	0	0	0	0	0	0	0	0	0	0	0	0	0	0	0	0	0	0	0	0	0	0	0
ASV1304			Dinophyceae	Prorocentrales	Prorocentraceae	Prorocentrum	Prorocentrum micans	0	0	0	0	0	0	21	0	0	0	0	16	0	0	0	0	0	0	0	0	0	0	0	0	0	0	0	0	0	0	0	0	0	0	0	0	0	0	0	0	0	0
ASV1305	Fungi	'uncultured fungus'	'uncultured fungus'	'uncultured fungus'	'uncultured fungus'	'uncultured fungus'	uncultured fungus	0	0	0	0	0	0	0	0	51	0	0	0	0	0	0	0	0	0	0	0	0	0	0	0	0	0	0	0	0	0	0	0	0	0	0	0	0	0	0	0	0	0
ASV1306			Chrysophyceae	Chromulinales	Chromulinaceae	'Spumella-like'	Spumella-like flagellate Got220	0	0	0	0	0	0	0	0	0	0	0	0	0	0	0	0	0	0	0	0	0	0	0	0	0	0	0	0	0	0	0	0	0	0	0	0	164	0	0	0	0	0
ASV1307	Stramenopila	Heterokontophyta	Oomycetes	Pythiales	Pythiaceae	Pythium	Pythium mamillatum	0	0	0	0	0	0	0	0	0	0	0	0	0	0	0	0	0	0	0	0	0	0	0	0	0	0	0	0	0	0	0	0	0	0	0	0	0	27	0	6	0	0
ASV1308	Fungi	'uncultured fungus'	'uncultured fungus'	'uncultured fungus'	'uncultured fungus'	'uncultured fungus'	uncultured fungus	0	0	0	0	0	0	0	0	0	0	0	0	0	0	0	0	0	0	0	0	0	0	0	0	0	0	0	0	0	0	0	0	0	0	0	0	0	0	0	0	0	42
ASV1309		Bacillariophyta	Bacillariophyceae	Surirellales	Surirellaceae	Surirella	Surirella sp. CCAP 1071/2	0	0	0	0	0	0	0	0	0	0	0	0	0	0	0	0	0	0	0	0	0	0	0	0	0	0	0	0	0	0	0	0	0	0	0	0	0	0	0	0	0	0
ASV1310	Fungi	'uncultured fungus'	'uncultured fungus'	'uncultured fungus'	'uncultured fungus'	'uncultured fungus'	uncultured fungus	0	0	0	0	0	0	0	0	0	0	0	15	0	0	0	0	0	0	0	0	0	0	0	0	0	0	0	0	0	0	0	0	0	0	0	0	0	0	0	0	0	0
ASV1311	Metazoa	Chordata	Actinopteri	Cypriniformes	Cyprinidae	Cyprinus	Cyprinus carpio	0	0	0	0	0	0	0	0	0	0	0	0	0	0	0	41	0	0	0	0	0	0	0	0	0	0	0	0	0	0	0	0	0	0	0	0	0	0	0	0	0	0
ASV1312	Metazoa	Chordata	Actinopteri		Ambassidae	Parambassis	Parambassis ranga	0	0	0	0	0	0	0	0	0	0	0	106	0	0	0	0	0	0	0	0	0	0	0	0	0	0	0	0	0	0	0	0	0	0	0	0	0	0	0	0	0	0
ASV1313			Chrysophyceae	Chromulinales	Chromulinaceae	'Spumella-like'	Spumella-like flagellate Got220	0	0	163	0	0	0	0	0	0	0	0	0	0	0	0	0	0	0	0	0	0	0	0	0	0	0	0	0	0	0	0	0	0	0	0	0	0	0	0	0	0	0
ASV1314	Stramenopila	Heterokontophyta	Oomycetes			Haptoglossa	Haptoglossa sp. SL20	0	0	29	37	0	0	0	0	0	0	0	0	0	0	30	0	0	0	0	0	0	0	0	0	0	0	0	0	0	0	0	0	0	0	0	66	0	0	0	0	0	0
ASV1315	Stramenopila	Heterokontophyta	Oomycetes	Peronosporales	Peronosporaceae	Hyaloperonospora	Hyaloperonospora cochleariae	0	0	0	0	0	0	0	0	0	0	146	0	0	0	0	0	0	0	0	0	0	0	0	0	0	0	0	0	0	0	0	0	0	0	0	0	0	0	0	0	0	0
ASV1316	Stramenopila	Heterokontophyta	Oomycetes	Lagenidiales	Lagenidiaceae	Lagenidium	Lagenidium juracyae	0	0	0	0	0	0	0	0	0	0	0	0	0	0	0	0	0	0	0	0	0	0	0	0	0	0	0	0	0	0	0	0	0	0	0	0	0	0	0	0	0	0
ASV1317			Chrysophyceae			'Spumella-like'	Spumella-like flagellate JBC/S24	0	0	0	0	0	0	0	0	0	0	0	0	0	0	0	0	0	0	0	0	0	0	0	0	0	0	0	0	0	0	0	0	0	0	0	0	0	0	0	0	0	0
ASV1318			Chrysophyceae	Chromulinales	Chromulinaceae	'Spumella-like'	Spumella-like flagellate 1031	0	0	0	0	0	0	0	0	0	0	0	0	0	0	0	0	0	0	0	0	0	0	0	0	0	0	2	0	22	0	0	0	0	4	0	0	0	0	0	0	0	0
ASV1319		Apicomplexa	Aconoidasida	Haemosporida	Plasmodiidae	Plasmodium	Plasmodium falciparum	0	0	0	0	0	0	0	0	0	0	0	0	0	0	0	0	0	0	0	0	0	0	0	0	0	0	0	0	161	0	0	0	0	0	0	0	0	0	0	0	0	0
ASV1320	Fungi	'uncultured fungus'	'uncultured fungus'	'uncultured fungus'	'uncultured fungus'	'uncultured fungus'	uncultured fungus	0	0	0	0	0	0	0	0	0	0	0	0	0	0	0	0	0	0	0	0	0	0	0	0	0	0	0	0	0	0	0	0	0	0	0	0	0	0	0	58	0	0
ASV1321	Fungi	'uncultured fungus'	'uncultured fungus'	'uncultured fungus'	'uncultured fungus'	'uncultured fungus'	uncultured fungus	0	0	0	0	0	0	0	0	0	0	0	0	0	0	0	0	0	0	0	0	0	0	0	0	0	0	0	0	0	0	0	0	0	0	0	0	0	0	0	0	0	0
ASV1322			Chrysophyceae			Segregatospumella	Segregatospumella sp.	0	0	0	0	0	0	0	0	0	0	0	0	0	0	0	0	0	0	0	0	0	0	0	0	0	0	0	0	0	0	0	0	0	0	0	0	0	0	0	0	0	0
ASV1323	Stramenopila	Heterokontophyta	Oomycetes	Lagenidiales	Lagenidiaceae	Lagenidium	Lagenidium sp. SLG-2014b	0	0	0	0	0	0	0	0	0	0	0	0	0	0	0	0	0	0	0	0	0	0	0	0	0	0	0	0	0	0	0	0	0	0	0	0	0	0	0	0	0	0
ASV1324	Stramenopila	Heterokontophyta	Oomycetes	Pythiales	Pythiaceae	Phytopythium	Phytopythium citrinum	0	0	0	0	0	0	0	0	0	0	0	0	0	0	0	0	0	0	0	0	0	0	0	0	0	0	0	0	0	0	0	0	0	0	0	0	0	0	0	0	0	0
ASV1325			Chrysophyceae	Chromulinales	Chromulinaceae	'Spumella-like'	Spumella-like flagellate 194f	0	0	0	0	0	0	0	0	0	0	0	0	0	0	0	0	0	0	0	0	0	0	0	0	0	6	0	0	0	0	0	0	0	0	0	0	0	0	0	0	0	0
ASV1326	Fungi	'uncultured fungus'	'uncultured fungus'	'uncultured fungus'	'uncultured fungus'	'uncultured fungus'	uncultured fungus	0	0	0	0	0	0	0	0	0	0	0	0	0	0	0	0	0	0	0	0	0	0	0	0	10	0	0	0	0	0	0	0	0	0	0	0	0	0	0	0	0	0
ASV1327			Chrysophyceae	Chromulinales	Chromulinaceae	'Spumella-like'	Spumella-like flagellate 1031	0	0	0	0	0	0	0	0	0	16	0	0	0	0	0	0	0	0	0	0	0	0	0	0	0	0	0	0	0	0	0	34	0	0	22	0	0	0	0	0	0	14
ASV1328	Stramenopila	Heterokontophyta	Oomycetes	Pythiales	Pythiaceae	Pythium	Pythium attrantheridium	0	0	0	0	0	0	160	0	0	0	0	0	0	0	0	0	0	0	0	0	0	0	0	0	0	0	0	0	0	0	0	0	0	0	0	0	0	0	0	0	0	0
ASV1329	Fungi	'uncultured fungus'	'uncultured fungus'	'uncultured fungus'	'uncultured fungus'	'uncultured fungus'	uncultured fungus	0	0	0	0	0	0	0	0	0	0	0	0	0	0	0	0	0	0	0	0	0	0	0	0	0	0	0	0	0	0	0	0	0	0	0	0	0	0	0	0	0	0
ASV1330		Bacteroidetes	Flavobacteriia	Flavobacteriales	Flavobacteriaceae	Elizabethkingia	Elizabethkingia ursingii	0	0	0	0	0	0	0	0	0	0	0	0	0	0	0	0	0	0	0	0	0	0	0	0	0	0	0	0	0	0	0	0	0	0	0	0	0	0	0	0	0	0
ASV1331			Chrysophyceae	Chromulinales	Chromulinaceae	Pedospumella	Pedospumella sp.	0	0	0	0	7	0	0	0	0	0	0	0	0	0	0	0	0	0	0	0	0	0	0	0	0	42	0	0	0	0	0	0	0	0	0	0	0	0	0	0	0	0
ASV1332		Apicomplexa				Nephromyces	Nephromyces sp. ex Molgula occidentalis	0	0	61	98	0	0	0	0	0	0	0	0	0	0	0	0	0	0	0	0	0	0	0	0	0	0	0	0	0	0	0	0	0	0	0	0	0	0	0	0	0	0
ASV1333	Stramenopila	Heterokontophyta	Oomycetes	Pythiales	Pythiaceae	Pythium	Pythium sp. 1 ROH-2015	0	0	0	0	0	0	0	0	0	159	0	0	0	0	0	0	0	0	0	0	0	0	0	0	0	0	0	0	0	0	0	0	0	0	0	0	0	0	0	0	0	0
ASV1334	Stramenopila	Heterokontophyta	Oomycetes	Pythiales	Pythiaceae	Pythium	Pythium sp.	0	0	0	0	0	0	0	0	0	0	0	0	0	0	0	0	0	0	0	0	0	0	0	0	0	0	159	0	0	0	0	0	0	0	0	0	0	0	0	0	0	0
ASV1335		'uncultured eukaryote'	'uncultured eukaryote'	'uncultured eukaryote'	'uncultured eukaryote'	'uncultured eukaryote'	uncultured eukaryote	0	0	0	0	0	0	0	0	0	0	0	0	0	0	0	0	0	0	0	0	0	0	0	0	0	0	0	0	0	0	0	0	0	0	0	0	0	0	0	0	0	0
ASV1336			Chrysophyceae			'Spumella-like'	Spumella-like flagellate JBC/S24	0	0	0	0	0	0	0	0	0	0	0	0	0	0	0	0	0	0	0	0	0	0	0	0	0	0	0	0	0	0	0	0	0	0	0	0	0	0	0	0	0	0
ASV1337	Fungi	'uncultured fungus'	'uncultured fungus'	'uncultured fungus'	'uncultured fungus'	'uncultured fungus'	uncultured fungus	0	0	0	0	0	0	0	0	0	0	0	0	0	0	0	0	0	0	0	0	0	0	0	0	0	0	0	0	0	0	0	7	0	0	0	0	0	0	0	9	0	0
ASV1338	Metazoa	Arthropoda	Insecta	Hymenoptera	Braconidae	Microplitis	Microplitis demolitor	0	0	0	0	0	0	0	0	0	0	0	0	0	0	0	0	0	0	0	0	0	104	53	0	0	0	0	0	0	0	0	0	0	0	0	0	0	0	0	0	0	0
ASV1339	Stramenopila	Heterokontophyta	Oomycetes	Pythiales	Pythiaceae	Pythium	Pythium attrantheridium	0	0	0	0	0	0	0	0	0	0	0	0	0	0	0	0	0	0	0	0	0	0	0	0	0	0	0	0	0	0	0	0	0	0	0	0	0	0	0	0	0	0
ASV1340		'uncultured eukaryote'	'uncultured eukaryote'	'uncultured eukaryote'	'uncultured eukaryote'	'uncultured eukaryote'	uncultured eukaryote	0	0	0	0	0	0	0	28	0	0	0	0	0	0	0	0	0	0	0	0	0	0	0	0	0	0	0	0	0	0	0	0	0	0	0	0	0	0	0	0	31	0
ASV1341			Chrysophyceae	Chromulinales	Chromulinaceae	Pedospumella	Pedospumella sp. JBM19	0	0	0	0	0	0	0	0	0	0	0	0	0	0	0	0	0	0	0	0	0	0	0	0	0	0	0	0	0	0	0	0	0	0	0	0	0	0	0	0	0	0
ASV1342	Metazoa	Chordata	Amphibia	Gymnophiona	Rhinatrematidae	Rhinatrema	Rhinatrema bivittatum	0	0	0	0	0	0	0	0	0	0	0	0	0	0	0	0	0	0	0	0	0	0	0	0	0	0	0	0	0	0	0	0	0	0	0	0	0	0	0	0	0	0
ASV1343	Stramenopila	Heterokontophyta	Oomycetes	Saprolegniales	Saprolegniaceae	Aphanomyces	Aphanomyces euteiches	0	0	0	0	0	0	0	0	0	0	0	0	0	0	0	0	0	0	0	0	0	0	0	0	0	0	0	0	0	0	0	0	0	0	0	0	0	0	0	0	0	0
ASV1344	Stramenopila	Heterokontophyta	Oomycetes	Pythiales	Pythiaceae	Pythium	Pythium camurandrum	0	0	0	0	0	0	0	0	0	0	0	0	0	0	0	0	0	0	0	0	0	0	0	0	0	0	0	0	0	0	0	0	0	0	0	0	0	0	0	0	0	0
ASV1345	Metazoa	Chordata		Testudines	Cheloniidae	Chelonia	Chelonia mydas	0	0	0	0	0	0	0	0	0	0	0	0	0	0	0	0	0	0	0	0	0	0	0	0	0	0	0	0	0	0	0	0	0	0	0	0	0	0	0	0	0	0
ASV1346	Stramenopila	Heterokontophyta	Oomycetes	Pythiales	Pythiogetonaceae	Pythiogeton	Pythiogeton proliferatum	0	0	0	0	0	0	0	0	0	0	0	0	0	0	0	0	0	0	0	0	0	0	0	0	0	0	0	0	0	0	0	0	0	0	0	0	0	0	0	0	0	0
ASV1347	Stramenopila	Heterokontophyta	Oomycetes	Pythiales	Pythiaceae	Pythium	Pythium sp. OPU797	0	0	0	0	0	0	0	0	0	0	0	0	0	0	0	0	0	0	0	0	0	0	0	0	0	0	0	0	0	0	0	0	0	0	0	0	0	0	0	0	0	0
ASV1348			Chrysophyceae			Segregatospumella	Segregatospumella sp.	0	0	0	0	0	0	0	0	0	0	0	0	0	0	0	0	0	0	0	0	0	110	0	0	0	0	0	0	0	0	0	0	0	0	0	0	0	0	0	0	0	0
ASV1349	Stramenopila	Heterokontophyta	Oomycetes	Saprolegniales	Saprolegniaceae	Plectospira	Plectospira myriandra	0	0	0	0	0	0	0	154	0	0	0	0	0	0	0	0	0	0	0	0	0	0	0	0	0	0	0	0	0	0	0	0	0	0	0	0	0	0	0	0	0	0
ASV1350	Fungi	'uncultured fungus'	'uncultured fungus'	'uncultured fungus'	'uncultured fungus'	'uncultured fungus'	uncultured fungus	0	0	0	0	0	0	0	0	0	0	0	0	0	0	0	0	0	0	0	0	0	0	0	0	0	0	0	0	0	0	0	0	0	0	0	0	0	0	0	0	0	0
ASV1351		Proteobacteria	Gammaproteobacteria	Oceanospirillales	Halomonadaceae	Kushneria	Kushneria konosiri	0	0	0	0	0	0	0	0	0	0	0	0	0	0	0	0	0	0	0	0	0	0	0	0	0	98	26	0	0	0	0	0	0	0	0	0	0	0	0	0	0	0
ASV1352	Stramenopila	Heterokontophyta	Oomycetes	Pythiales	Pythiaceae	Pythium	Pythium sp.	0	0	0	0	0	0	0	0	0	0	0	0	0	0	0	0	0	0	0	0	0	0	0	0	0	0	0	0	0	0	0	0	0	0	0	0	0	0	0	0	0	0
ASV1353			Chrysophyceae			Segregatospumella	Segregatospumella sp.	0	0	0	0	0	0	0	0	0	0	0	0	0	0	0	0	0	0	0	0	0	0	0	0	0	0	0	0	0	0	0	0	0	0	0	0	0	0	0	0	0	0
ASV1354	Metazoa	Arthropoda	Hexanauplia	Siphonostomatoida	Caligidae	Caligus	Caligus rogercresseyi	0	0	0	0	0	0	0	0	0	0	0	0	0	0	0	0	0	0	0	0	0	0	0	0	0	0	0	0	0	0	0	0	0	0	0	0	0	0	0	0	0	0
ASV1355	Fungi	'uncultured fungus'	'uncultured fungus'	'uncultured fungus'	'uncultured fungus'	'uncultured fungus'	uncultured fungus	0	0	14	11	0	0	0	0	0	0	0	0	0	0	0	0	0	0	0	0	0	0	0	0	0	0	0	0	0	0	0	0	0	0	0	0	127	0	0	0	0	0
ASV1356	Metazoa	Chordata	Actinopteri	Salmoniformes	Salmonidae	Coregonus	Coregonus sp. 'balchen'	0	0	0	0	0	0	0	0	0	0	0	0	0	0	0	0	0	0	0	0	0	0	0	0	0	0	0	0	0	0	0	0	0	0	0	0	0	0	0	0	0	0
ASV1357		Apicomplexa	Aconoidasida	Haemosporida	Plasmodiidae	Plasmodium	Plasmodium sp. gorilla clade G3	0	0	0	0	0	0	0	0	0	0	0	0	0	0	0	0	0	0	0	0	0	0	0	0	0	0	0	0	0	0	0	0	0	0	0	0	0	0	0	0	0	0
ASV1358	Metazoa	Chordata	Aves	Accipitriformes	Accipitridae	Aquila	Aquila chrysaetos	0	0	0	0	0	0	0	0	0	0	0	0	0	0	0	0	0	0	0	0	0	0	0	0	0	0	0	0	0	0	0	0	0	0	0	0	0	0	0	0	0	0
ASV1359		'uncultured eukaryote'	'uncultured eukaryote'	'uncultured eukaryote'	'uncultured eukaryote'	'uncultured eukaryote'	uncultured eukaryote	0	0	0	0	0	0	0	55	0	0	0	0	0	0	0	0	0	0	0	0	0	0	0	0	0	0	0	0	0	0	0	0	0	0	0	21	0	0	0	21	0	0
ASV1360		Bacillariophyta	Bacillariophyceae	Naviculales	Naviculaceae	Navicula	Navicula trivialis	0	0	0	0	0	0	0	0	150	0	0	0	0	0	0	0	0	0	0	0	0	0	0	0	0	0	0	0	0	0	0	0	0	0	0	0	0	0	0	0	0	0
ASV1361	Stramenopila	Heterokontophyta	Oomycetes	Lagenidiales	Lagenidiaceae	Lagenidium	Lagenidium sp. SLG-2014b	0	0	0	0	0	0	0	0	0	0	0	0	0	0	0	0	0	0	0	0	0	0	150	0	0	0	0	0	0	0	0	0	0	0	0	0	0	0	0	0	0	0
ASV1362	Stramenopila	Heterokontophyta	Oomycetes	Pythiales	Pythiaceae	Pythium	Pythium oligandrum	0	0	0	0	0	0	0	0	0	0	0	0	0	0	0	0	0	0	0	0	0	0	0	0	0	0	0	0	0	0	0	0	0	0	0	0	0	0	0	0	0	0
ASV1363	Stramenopila	Heterokontophyta	Oomycetes	Peronosporales	Peronosporaceae	Hyaloperonospora	Hyaloperonospora cochleariae	0	0	0	0	0	0	0	0	0	0	0	0	0	0	0	0	0	0	0	0	0	0	0	0	0	0	0	0	0	0	0	0	0	0	0	0	0	0	0	0	0	0
ASV1364	Stramenopila	Heterokontophyta	Oomycetes	Pythiales	Pythiaceae	Phytopythium	Phytopythium litorale	0	0	0	0	0	0	0	0	0	0	0	0	0	0	0	0	0	0	0	0	0	0	0	0	0	0	0	0	0	0	0	0	0	0	0	0	0	0	0	0	0	0
ASV1365	Stramenopila	Heterokontophyta	Oomycetes	Pythiales	Pythiaceae	Pythium	Pythium attrantheridium	0	0	0	0	0	0	0	0	0	0	0	0	0	0	0	0	0	0	0	0	0	0	0	0	0	0	0	0	0	0	0	0	0	0	0	0	0	0	0	0	0	0
ASV1366	Fungi	'uncultured fungus'	'uncultured fungus'	'uncultured fungus'	'uncultured fungus'	'uncultured fungus'	uncultured fungus	0	0	0	0	0	0	0	0	0	0	0	0	0	0	0	0	0	0	0	0	0	0	0	0	0	0	0	0	0	0	0	0	0	0	0	0	0	0	0	0	0	0
ASV1367	Stramenopila	Heterokontophyta	Oomycetes	Pythiales	Pythiogetonaceae	Pythiogeton	Pythiogeton uniforme	0	0	0	0	0	0	0	0	0	0	0	0	0	0	0	0	0	0	0	0	0	0	0	0	0	0	0	0	0	0	0	0	0	0	0	0	0	0	0	0	0	0
ASV1368	Stramenopila	Heterokontophyta	Oomycetes		Lagenaceae	Lagena	Lagena radicicola	0	0	0	0	0	0	0	0	0	0	0	0	0	0	0	0	0	0	0	0	0	0	0	0	148	0	0	0	0	0	0	0	0	0	0	0	0	0	0	0	0	0
ASV1369			Chrysophyceae	Chromulinales	Chromulinaceae	Pedospumella	Pedospumella encystans	0	0	0	0	0	0	0	0	0	0	0	0	0	0	0	0	0	0	0	0	0	0	0	0	0	0	0	0	0	0	0	0	0	0	0	0	0	0	0	0	0	0
ASV1370	Stramenopila	Heterokontophyta	Oomycetes	Lagenidiales	Lagenidiaceae	Lagenidium	Lagenidium sp. SL10	0	0	0	0	0	0	0	0	0	0	0	0	0	0	0	0	0	0	0	0	0	0	0	0	0	0	0	0	0	0	0	0	0	0	0	0	0	0	0	0	0	0
ASV1371	Stramenopila	Heterokontophyta	Oomycetes	Pythiales	Pythiogetonaceae	Pythiogeton	Pythiogeton uniforme	0	0	0	0	0	0	0	0	0	0	0	0	0	0	0	0	0	0	0	0	0	0	0	0	0	0	0	0	0	0	0	0	0	0	0	146	0	0	0	0	0	0
ASV1372	Stramenopila	Heterokontophyta	Oomycetes	Pythiales	Pythiaceae	Pythium	Pythium perplexum	0	0	0	0	0	0	0	0	0	0	0	0	0	0	0	0	0	0	0	0	0	0	0	0	0	0	0	0	0	0	0	0	0	0	0	0	0	0	0	0	0	0
ASV1373	Fungi	Ascomycota	Saccharomycetes	Saccharomycetales	Debaryomycetaceae	Hyphopichia	Hyphopichia pseudoburtonii	0	0	0	0	0	0	0	0	0	0	0	0	0	0	0	0	0	0	0	0	0	0	0	0	0	0	0	8	0	0	0	0	0	0	0	0	0	0	0	0	0	0
ASV1374	Fungi	'uncultured fungus'	'uncultured fungus'	'uncultured fungus'	'uncultured fungus'	'uncultured fungus'	uncultured fungus	0	0	0	0	0	0	0	0	0	0	0	0	0	0	0	0	0	0	0	0	0	0	0	0	0	0	0	0	0	0	0	0	82	0	0	0	0	0	0	0	0	0
ASV1376		Bacillariophyta	Bacillariophyceae	Naviculales	Naviculaceae	Navicula	Navicula cryptocephala	0	0	0	0	0	0	0	0	146	0	0	0	0	0	0	0	0	0	0	0	0	0	0	0	0	0	0	0	0	0	0	0	0	0	0	0	0	0	0	0	0	0
ASV1377			Chrysophyceae	Chromulinales	Chromulinaceae	'Spumella-like'	Spumella-like flagellate Got220	0	0	0	0	0	0	0	0	0	0	0	0	0	0	0	0	0	0	0	146	0	0	0	0	0	0	0	0	0	0	0	0	0	0	0	0	0	0	0	0	0	0
ASV1378	Fungi	'uncultured fungus'	'uncultured fungus'	'uncultured fungus'	'uncultured fungus'	'uncultured fungus'	uncultured fungus	0	0	0	0	0	0	0	0	0	0	0	0	0	0	0	0	0	0	0	0	0	0	0	0	0	0	0	0	0	0	0	0	0	0	0	0	0	0	0	47	0	0
ASV1379	Metazoa	Arthropoda	Insecta	Hymenoptera	Formicidae	Cyphomyrmex	Cyphomyrmex costatus	0	0	0	0	0	0	0	0	0	0	0	0	0	0	0	0	0	0	0	0	0	0	0	0	0	0	0	0	0	0	0	0	0	0	0	0	0	0	0	0	0	0
ASV1380	Stramenopila	Heterokontophyta	Oomycetes	Pythiales	Pythiaceae	Pythium	Pythium rhizosaccharum	0	0	0	0	0	0	0	0	0	0	0	0	0	0	0	0	0	0	0	0	0	0	0	0	0	0	0	0	0	0	0	0	0	0	0	0	0	0	0	0	0	0
ASV1381	Stramenopila	Heterokontophyta	Oomycetes	Pythiales	Pythiaceae	Pythium	Pythium oligandrum	0	0	0	0	0	0	0	0	0	0	0	0	0	0	0	0	0	0	0	0	0	0	0	0	0	0	0	0	0	0	0	0	0	0	0	0	0	0	0	0	0	0
ASV1382	Stramenopila	Heterokontophyta	Oomycetes	Pythiales	Pythiaceae	Pythium	Pythium oligandrum	0	0	0	0	0	0	0	0	0	0	0	0	0	0	0	0	0	0	0	0	0	0	0	0	0	0	0	0	0	0	0	0	0	0	0	0	0	0	0	0	0	0
ASV1383		'uncultured eukaryote'	'uncultured eukaryote'	'uncultured eukaryote'	'uncultured eukaryote'	'uncultured eukaryote'	uncultured eukaryote	0	0	0	0	0	0	0	0	0	0	0	0	0	0	0	0	0	0	0	0	0	0	0	0	0	0	0	0	0	0	0	0	0	0	0	0	0	0	0	0	0	0
ASV1384	Stramenopila	Heterokontophyta	Oomycetes	Pythiales	Pythiaceae	Pythium	Pythium rostratifingens	0	0	0	0	0	0	0	0	0	0	0	0	0	0	0	0	0	0	0	0	0	0	0	0	0	88	0	0	0	57	0	0	0	0	0	0	0	0	0	0	0	0
ASV1385	Stramenopila	Heterokontophyta	Oomycetes	Pythiales	Pythiogetonaceae	Pythiogeton	Pythiogeton uniforme	0	0	0	0	0	0	0	0	0	0	0	0	0	0	0	0	0	0	0	0	0	0	0	0	0	0	0	0	0	0	0	0	0	0	0	0	0	0	0	0	0	0
ASV1386	Viridiplantae	Streptophyta	Magnoliopsida	Gentianales	Apocynaceae	Prestonia	Prestonia annularis	0	0	0	14	0	0	0	0	0	0	0	0	0	0	0	0	0	0	0	0	0	73	57	0	0	0	0	0	0	0	0	0	0	0	0	0	0	0	0	0	0	0
ASV1387			Chrysophyceae	Chromulinales	Chromulinaceae	Spumella	Spumella sp.	0	0	0	0	0	0	0	0	0	0	0	0	0	0	0	0	0	0	0	0	0	0	0	0	0	0	0	0	0	0	0	0	0	0	0	0	0	0	0	0	0	0
ASV1388	Fungi	'uncultured fungus'	'uncultured fungus'	'uncultured fungus'	'uncultured fungus'	'uncultured fungus'	uncultured fungus	0	0	0	0	0	0	0	0	0	0	0	0	0	0	0	0	0	0	0	0	0	0	0	0	0	0	0	0	0	0	0	0	0	0	0	0	0	0	0	0	0	0
ASV1389			Chrysophyceae			Segregatospumella	Segregatospumella sp.	0	0	0	0	0	0	0	0	0	0	0	0	0	0	0	0	0	0	0	0	0	0	0	0	0	0	0	0	0	0	0	0	0	0	0	0	0	0	0	0	0	0
ASV1390	Stramenopila	Heterokontophyta	Oomycetes	Pythiales	Pythiaceae	Pythium	Pythium rostratum	0	0	0	0	0	0	0	0	0	0	0	0	0	0	0	0	0	0	0	0	0	0	0	0	0	0	0	0	0	0	0	0	0	0	0	0	0	0	0	0	0	0
ASV1391	Fungi	'uncultured fungus'	'uncultured fungus'	'uncultured fungus'	'uncultured fungus'	'uncultured fungus'	uncultured fungus	0	0	0	4	0	0	0	0	0	0	0	0	0	0	0	0	0	0	0	0	0	0	0	0	0	0	0	0	0	0	0	0	0	0	0	0	0	85	0	0	0	0
ASV1392	Stramenopila	Heterokontophyta	Oomycetes	Saprolegniales	Saprolegniaceae	Aphanomyces	Aphanomyces sp. APH1	0	0	0	0	0	0	0	0	0	0	0	0	0	0	0	0	0	0	0	0	0	0	0	0	0	0	143	0	0	0	0	0	0	0	0	0	0	0	0	0	0	0
ASV1393		Bacillariophyta	Bacillariophyceae	Naviculales	Naviculaceae	Navicula	Navicula arenaria	0	0	0	0	0	0	0	0	0	0	0	0	0	0	0	0	0	0	0	0	0	0	0	0	0	0	0	0	0	0	0	0	0	0	0	142	0	0	0	0	0	0
ASV1394		'uncultured eukaryote'	'uncultured eukaryote'	'uncultured eukaryote'	'uncultured eukaryote'	'uncultured eukaryote'	uncultured eukaryote	0	0	0	0	0	0	0	0	0	0	0	0	0	0	0	0	0	0	0	0	0	0	0	0	0	0	0	0	0	0	0	0	0	0	0	0	0	0	0	0	0	0
ASV1395			Dinophyceae	Prorocentrales	Prorocentraceae	Prorocentrum	Prorocentrum micans	28	0	0	0	0	0	0	0	0	0	0	0	0	0	0	0	0	0	0	0	0	0	0	0	0	0	0	0	0	0	0	0	0	0	0	0	0	0	0	0	0	0
ASV1396	Fungi	'uncultured fungus'	'uncultured fungus'	'uncultured fungus'	'uncultured fungus'	'uncultured fungus'	uncultured fungus	0	0	25	0	0	0	0	0	0	0	0	0	0	0	0	0	18	0	0	0	0	0	0	0	0	0	0	0	0	0	0	0	0	0	0	53	0	0	0	0	0	15
ASV1397	Fungi	'uncultured fungus'	'uncultured fungus'	'uncultured fungus'	'uncultured fungus'	'uncultured fungus'	uncultured fungus	0	0	0	0	0	0	0	0	0	0	0	0	0	0	0	0	0	0	0	0	0	0	0	0	0	0	0	0	0	0	0	0	0	0	0	0	0	0	0	0	6	0
ASV1398	Fungi	'uncultured fungus'	'uncultured fungus'	'uncultured fungus'	'uncultured fungus'	'uncultured fungus'	uncultured fungus	0	0	0	0	0	0	0	0	0	0	0	0	0	0	0	0	0	0	0	0	0	0	0	0	0	0	0	0	0	0	0	0	0	0	0	0	0	0	0	0	0	0
ASV1399	Stramenopila	Heterokontophyta	Oomycetes	Peronosporales	Peronosporaceae	Phytophthora	Phytophthora sojae	0	0	0	0	0	0	0	0	0	0	0	0	0	0	0	0	0	0	0	0	0	0	0	0	0	0	0	0	0	0	0	0	0	0	0	0	0	0	0	0	0	0
ASV1400	Stramenopila	Heterokontophyta	Oomycetes	Pythiales	Pythiaceae	Pythium	Pythium oligandrum	0	0	0	0	0	0	0	0	0	0	0	0	0	0	0	0	0	0	0	0	0	0	0	0	0	0	0	0	0	0	0	0	0	0	0	0	0	0	0	0	0	0
ASV1401	Stramenopila	Heterokontophyta	Oomycetes	Pythiales	Pythiaceae	Pythium	Pythium sp. unique1sub3	0	0	0	0	0	0	0	0	0	0	0	0	0	0	0	0	0	0	0	0	0	0	0	0	0	0	0	0	0	0	0	0	0	0	0	0	0	0	0	0	0	0
ASV1402	Stramenopila	Heterokontophyta	Oomycetes	Pythiales	Pythiogetonaceae	Pythiogeton	Pythiogeton uniforme	0	0	0	0	0	0	0	0	0	0	0	19	0	0	0	0	0	0	0	0	0	0	0	0	0	0	0	0	0	0	0	0	0	122	0	0	0	0	0	0	0	0
ASV1403	Stramenopila	Heterokontophyta	Oomycetes	Leptomitales		Apodachlya	Apodachlya minima	0	0	0	0	0	0	0	0	0	0	0	0	0	88	0	0	0	0	0	0	0	0	0	0	0	0	0	0	0	0	0	0	0	0	0	0	0	0	0	0	0	0
ASV1404		Bacillariophyta	Bacillariophyceae	Surirellales	Surirellaceae	Surirella	Surirella sp. CCAP 1071/2	0	0	0	0	0	0	0	0	141	0	0	0	0	0	0	0	0	0	0	0	0	0	0	0	0	0	0	0	0	0	0	0	0	0	0	0	0	0	0	0	0	0
ASV1405	Stramenopila	Heterokontophyta	Oomycetes	Pythiales	Pythiaceae	Pythium	Pythium polymastum	0	0	0	0	0	0	0	0	0	0	0	0	0	0	0	0	0	0	0	0	0	141	0	0	0	0	0	0	0	0	0	0	0	0	0	0	0	0	0	0	0	0
ASV1406	Stramenopila	Heterokontophyta	Oomycetes	Pythiales	Pythiaceae	Pythium	Pythium sp. V1	0	0	0	0	0	0	0	0	0	0	0	0	0	0	0	0	0	0	0	0	0	0	0	0	0	0	0	0	0	0	0	0	0	0	0	0	0	0	0	0	0	0
ASV1407			Chrysophyceae	Chromulinales	Chromulinaceae	'Spumella-like'	Spumella-like flagellate 1006	0	0	0	0	0	0	0	0	0	0	0	0	0	0	0	0	0	0	0	0	0	0	0	0	0	0	0	0	0	0	0	0	0	0	0	0	0	0	0	0	0	0
ASV1408	Fungi	'uncultured fungus'	'uncultured fungus'	'uncultured fungus'	'uncultured fungus'	'uncultured fungus'	uncultured fungus	0	0	0	0	0	0	0	0	0	0	0	0	0	0	0	0	0	0	0	0	0	0	0	0	0	0	0	0	0	0	0	0	0	0	0	0	0	0	0	0	0	0
ASV1409	Stramenopila	Heterokontophyta	Oomycetes	Peronosporales	Peronosporaceae	Phytophthora	Phytophthora cambivora	0	0	60	80	0	0	0	0	0	0	0	0	0	0	0	0	0	0	0	0	0	0	0	0	0	0	0	0	0	0	0	0	0	0	0	0	0	0	0	0	0	0
ASV1410	Metazoa	Arthropoda	Hexanauplia	Siphonostomatoida	Caligidae	Caligus	Caligus rogercresseyi	0	0	0	0	0	0	0	0	0	0	0	0	0	0	0	0	0	0	0	0	0	0	0	0	0	0	0	0	0	0	0	0	0	0	0	0	0	0	0	0	0	0
ASV1411		Firmicutes	Bacilli	Lactobacillales	Streptococcaceae	Streptococcus	Streptococcus porcinus	0	0	0	0	0	0	0	0	0	0	0	0	0	0	0	0	0	0	0	0	0	0	0	0	0	0	0	0	0	0	0	0	0	0	0	0	0	0	0	0	0	0
ASV1412		Bacillariophyta	Bacillariophyceae	Bacillariales	Bacillariaceae	Nitzschia	Nitzschia palea	10	0	0	0	0	0	0	0	0	0	0	0	0	0	0	0	0	0	0	0	0	0	0	0	0	0	0	0	0	0	0	0	0	0	0	0	0	0	0	0	0	0
ASV1413	Fungi	Ascomycota	Dothideomycetes	Pleosporales	Leptosphaeriaceae	Leptosphaeria	Leptosphaeria biglobosa	0	0	0	0	0	0	0	0	0	0	0	0	0	0	0	0	0	0	0	0	0	0	0	0	0	0	0	0	0	0	0	0	0	0	0	0	0	0	0	0	0	0
ASV1414	Stramenopila	Heterokontophyta	Oomycetes	Pythiales	Pythiaceae	Pythium	Pythium alternatum	0	0	0	0	0	0	0	0	0	0	0	0	0	0	0	0	0	0	0	0	0	0	0	0	0	0	0	0	0	0	0	0	0	0	0	0	0	0	0	0	0	0
ASV1415	Stramenopila	Heterokontophyta	Oomycetes	Pythiales	Pythiaceae	Pythium	Pythium cf. deliense D2.5S2P21-2	0	0	0	0	0	0	0	0	0	0	0	0	0	0	46	92	0	0	0	0	0	0	0	0	0	0	0	0	0	0	0	0	0	0	0	0	0	0	0	0	0	0
ASV1416	Stramenopila	Heterokontophyta	Oomycetes	Saprolegniales	Saprolegniaceae	Saprolegnia	Saprolegnia anisospora	0	0	0	0	0	0	0	0	0	0	0	0	0	0	0	0	0	0	0	0	0	0	0	0	0	0	0	0	0	0	0	0	0	0	0	0	0	0	0	0	0	0
ASV1417	Stramenopila	Heterokontophyta	Oomycetes	Peronosporales	Peronosporaceae	Bremia	Bremia centaureae	0	0	0	0	0	0	0	0	0	0	0	0	0	0	0	0	0	0	0	0	0	0	0	0	0	0	0	0	0	0	0	0	0	0	0	0	0	0	0	0	0	0
ASV1418			Chrysophyceae	Chromulinales	Chromulinaceae	Pedospumella	Pedospumella sp. JBM19	0	0	0	0	0	0	0	0	0	0	0	0	0	0	0	0	0	0	0	0	0	0	0	0	0	0	0	0	0	0	0	0	0	0	0	0	0	0	0	0	0	0
ASV1419			Chrysophyceae	Chromulinales	Chromulinaceae	Pedospumella	Pedospumella sp. JBM19	0	0	0	0	0	0	0	0	0	0	0	0	0	0	0	0	0	0	0	0	0	0	0	0	0	0	0	0	0	0	0	0	0	0	0	0	0	0	0	0	0	0
ASV1420		Proteobacteria	Gammaproteobacteria	Vibrionales	Vibrionaceae	Aliivibrio	Aliivibrio wodanis	0	0	0	0	0	0	0	0	0	0	0	0	0	0	0	0	0	0	0	0	0	0	0	0	0	0	0	0	0	0	0	0	0	0	0	0	0	0	0	0	0	0
ASV1421	Fungi	'uncultured fungus'	'uncultured fungus'	'uncultured fungus'	'uncultured fungus'	'uncultured fungus'	uncultured fungus	0	0	0	0	0	0	0	0	0	0	0	0	0	0	0	0	0	0	0	0	0	0	0	0	0	0	0	0	0	0	0	0	0	0	0	0	0	0	0	0	0	0
ASV1422	Stramenopila	Heterokontophyta	Oomycetes	Pythiales	Pythiaceae	Globisporangium	Globisporangium intermedium	0	0	0	0	0	0	0	0	0	0	0	0	0	0	0	0	0	0	0	0	0	0	0	0	0	0	0	0	0	0	0	0	0	0	0	0	0	0	0	0	0	0
ASV1423	Metazoa	Chordata	Actinopteri		Sciaenidae	Larimichthys	Larimichthys crocea	0	0	0	0	0	0	0	0	0	0	0	0	0	0	0	34	0	0	0	0	0	0	0	0	0	0	0	0	0	0	0	0	0	0	0	103	0	0	0	0	0	0
ASV1424	Stramenopila	Heterokontophyta	Oomycetes	Pythiales	Pythiaceae	Pythium	Pythium aff. monospermum	0	0	0	0	0	0	0	0	0	137	0	0	0	0	0	0	0	0	0	0	0	0	0	0	0	0	0	0	0	0	0	0	0	0	0	0	0	0	0	0	0	0
ASV1425	Stramenopila	Heterokontophyta	Oomycetes	Pythiales	Pythiaceae	Pythium	Pythium heterothallicum	0	0	0	0	0	0	0	0	0	0	0	0	0	0	0	0	0	0	0	0	0	0	0	0	0	0	0	0	0	0	0	0	0	0	0	136	0	0	0	0	0	0
ASV1426		Bacillariophyta	Bacillariophyceae	Bacillariales	Bacillariaceae	Nitzschia	Nitzschia palea	0	0	0	0	0	0	0	0	0	0	0	0	0	0	0	0	0	0	0	0	0	0	0	0	0	0	0	0	0	0	0	0	0	0	0	0	0	0	0	0	0	0
ASV1427	Stramenopila	Heterokontophyta	Oomycetes	Pythiales	Pythiaceae	Globisporangium	Globisporangium intermedium	0	0	0	0	0	0	0	0	0	0	0	0	0	0	0	0	0	0	0	0	0	0	0	0	0	0	0	0	0	0	0	0	0	0	0	0	0	0	0	0	0	0
ASV1428	Stramenopila	Heterokontophyta	Oomycetes	Saprolegniales	Saprolegniaceae	Achlya	Achlya bisexualis	0	0	0	0	0	0	0	0	0	0	0	0	0	87	0	0	0	0	0	0	0	0	0	0	0	0	0	0	0	0	0	0	0	0	0	0	0	0	0	0	0	0
ASV1429		Ciliophora	Oligohymenophorea	Hymenostomatida	Tetrahymenidae	Tetrahymena	Tetrahymena thermophila	0	0	0	0	0	0	0	0	0	0	0	0	0	0	0	0	0	0	0	0	0	0	104	0	0	0	0	0	0	0	0	0	0	0	0	0	0	0	0	0	0	0
ASV1430	Fungi	'uncultured fungus'	'uncultured fungus'	'uncultured fungus'	'uncultured fungus'	'uncultured fungus'	uncultured fungus	0	0	115	21	0	0	0	0	0	0	0	0	0	0	0	0	0	0	0	0	0	0	0	0	0	0	0	0	0	0	0	0	0	0	0	0	0	0	0	0	0	0
ASV1431	Stramenopila	Heterokontophyta	Oomycetes	Lagenidiales	Lagenidiaceae	Lagenidium	Lagenidium sp. SLG-2014b	0	0	0	0	0	0	0	0	0	136	0	0	0	0	0	0	0	0	0	0	0	0	0	0	0	0	0	0	0	0	0	0	0	0	0	0	0	0	0	0	0	0
ASV1432	Stramenopila	Heterokontophyta	Oomycetes	Lagenidiales	Lagenidiaceae	Lagenidium	Lagenidium sp. SLG-2014b	0	0	0	0	0	0	0	0	0	0	0	0	0	0	0	0	0	0	0	0	0	0	136	0	0	0	0	0	0	0	0	0	0	0	0	0	0	0	0	0	0	0
ASV1433	Fungi	'uncultured fungus'	'uncultured fungus'	'uncultured fungus'	'uncultured fungus'	'uncultured fungus'	uncultured fungus	0	0	0	0	0	0	0	0	0	0	0	0	0	0	0	0	0	0	0	0	0	0	0	0	0	0	0	0	0	0	0	0	0	0	0	0	0	90	0	0	0	0
ASV1434	Viridiplantae	Streptophyta	Magnoliopsida	Malvales	Malvaceae	Gossypioides	Gossypioides kirkii	0	0	0	0	0	0	0	0	0	0	0	0	0	0	0	0	0	0	0	0	0	0	0	0	0	0	0	0	0	0	0	0	0	0	0	0	0	0	0	0	0	0
ASV1435			Dinophyceae	Prorocentrales	Prorocentraceae	Prorocentrum	Prorocentrum micans	0	31	0	0	0	0	0	0	13	0	0	0	0	0	0	0	0	0	0	0	0	0	0	0	0	66	0	0	0	0	0	0	0	0	0	0	0	0	0	0	0	0
ASV1436			Chrysophyceae	Chromulinales	Chromulinaceae	'Spumella-like'	Spumella-like flagellate 194f	0	0	0	0	0	0	0	0	0	0	0	0	0	0	0	0	0	0	0	0	0	0	0	0	0	0	0	0	0	0	0	0	0	0	0	0	0	63	0	0	0	0
ASV1437			Chrysophyceae	Chromulinales	Chromulinaceae	'Spumella-like'	Spumella-like flagellate 1006	0	0	0	0	0	0	0	0	0	0	0	0	0	0	0	0	0	0	0	0	0	0	0	0	0	0	0	0	0	0	0	0	0	0	0	0	0	0	0	0	0	0
ASV1438	Fungi	'uncultured fungus'	'uncultured fungus'	'uncultured fungus'	'uncultured fungus'	'uncultured fungus'	uncultured fungus	0	0	0	0	0	0	0	0	0	0	0	0	0	0	0	0	0	0	0	0	0	0	0	0	0	0	0	0	0	0	0	0	0	0	0	0	0	0	0	0	0	0
ASV1439	Stramenopila	Heterokontophyta	Oomycetes	Pythiales	Pythiaceae	Pilasporangium	Pilasporangium apinafurcum	0	0	0	0	0	0	0	0	0	0	0	0	0	0	0	0	0	0	0	0	0	0	0	0	0	0	0	0	0	0	0	0	0	0	0	0	0	0	0	0	0	0
ASV1440	Stramenopila	Heterokontophyta	Oomycetes	Pythiales	Pythiaceae	Pythium	Pythium macrosporum	0	0	0	0	0	0	0	0	0	0	0	0	0	0	0	0	0	0	0	0	0	0	0	0	0	0	0	0	0	0	0	0	0	0	0	0	0	0	0	0	0	0
ASV1441		Bacillariophyta	Bacillariophyceae	Bacillariales	Bacillariaceae	Cylindrotheca	Cylindrotheca closterium	0	0	0	0	0	0	0	0	0	0	0	0	0	0	0	0	0	0	0	0	0	0	55	0	0	0	0	0	0	0	0	0	0	0	0	0	0	0	0	0	0	0
ASV1442			Chrysophyceae	Chromulinales	Chromulinaceae	'Spumella-like'	Spumella-like flagellate Got220	0	0	0	134	0	0	0	0	0	0	0	0	0	0	0	0	0	0	0	0	0	0	0	0	0	0	0	0	0	0	0	0	0	0	0	0	0	0	0	0	0	0
ASV1443	Metazoa	Chordata	Actinopteri		Ambassidae	Parambassis	Parambassis ranga	0	0	0	0	0	0	0	0	37	0	0	0	0	97	0	0	0	0	0	0	0	0	0	0	0	0	0	0	0	0	0	0	0	0	0	0	0	0	0	0	0	0
ASV1444	Stramenopila	Heterokontophyta	Oomycetes	Pythiales	Pythiaceae	Pythium	Pythium oligandrum	0	0	0	0	0	0	0	0	0	0	0	0	0	0	0	0	0	0	0	0	0	0	0	0	0	0	0	0	0	0	0	0	0	0	0	0	0	0	0	0	0	0
ASV1445	Stramenopila	Heterokontophyta	Oomycetes	Pythiales	Pythiaceae	Pythium	Pythium oligandrum	0	0	0	0	0	0	0	0	0	0	0	0	0	0	0	0	0	0	0	0	0	0	0	0	0	0	0	0	0	0	0	0	0	0	0	0	0	0	0	0	0	0
ASV1446			Chrysophyceae			'Spumella-like'	Spumella-like flagellate JBC/S24	0	0	0	0	0	0	0	0	0	0	0	0	0	0	0	0	0	0	0	0	0	0	0	0	0	0	0	0	0	0	0	0	0	0	0	0	0	0	0	0	0	0
ASV1447	Stramenopila	Heterokontophyta	Oomycetes	Saprolegniales	Saprolegniaceae	Saprolegnia	Saprolegnia sp.	0	0	0	0	0	0	0	0	0	0	0	18	0	0	0	0	0	0	0	0	0	0	0	0	0	0	0	0	0	0	0	0	0	0	0	0	0	0	0	0	0	36
ASV1448	Stramenopila	Heterokontophyta	Oomycetes	Peronosporales	Peronosporaceae	Peronospora	Peronospora trivialis	0	0	0	0	0	0	0	0	0	0	0	0	0	0	0	0	0	0	0	0	0	0	0	0	133	0	0	0	0	0	0	0	0	0	0	0	0	0	0	0	0	0
ASV1449		Bacillariophyta	Bacillariophyceae	Naviculales	Naviculaceae	Navicula	Navicula trivialis	0	0	0	0	0	0	0	0	0	0	0	0	0	0	0	0	0	0	0	0	0	0	0	0	0	0	0	0	133	0	0	0	0	0	0	0	0	0	0	0	0	0
ASV1450			Chrysophyceae	Chromulinales	Chromulinaceae	'Spumella-like'	Spumella-like flagellate 391f	0	0	0	0	0	0	0	0	0	0	0	0	0	0	0	0	0	0	0	0	0	0	0	0	0	0	0	0	0	0	0	0	0	0	0	0	0	0	0	0	0	0
ASV1451	Stramenopila	Heterokontophyta	Oomycetes	Pythiales	Pythiogetonaceae	Pythiogeton	Pythiogeton zizaniae	0	0	0	0	0	0	0	0	0	0	0	0	0	0	0	0	0	0	0	0	0	0	0	0	0	0	0	0	0	0	0	0	0	0	0	0	0	0	0	0	0	0
ASV1452		Bacillariophyta	Bacillariophyceae	Bacillariales	Bacillariaceae	Nitzschia	Nitzschia palea	0	0	0	0	0	0	0	0	0	0	0	0	0	0	0	0	0	0	0	0	0	0	0	0	0	0	0	0	0	0	0	0	0	0	0	0	0	0	0	0	0	0
ASV1453	Metazoa	Chordata	Actinopteri		Ambassidae	Parambassis	Parambassis ranga	0	0	0	0	0	0	0	0	0	0	0	84	0	0	0	0	0	0	0	0	0	0	0	0	0	0	0	0	0	0	0	0	0	0	0	0	0	0	0	0	33	0
ASV1454	Metazoa	Chordata	Actinopteri	Atheriniformes	Phallostethidae	Neostethus	Neostethus bicornis	0	0	0	0	0	0	0	0	0	0	0	0	0	102	0	0	0	0	0	0	0	0	0	0	0	0	0	0	0	0	0	0	0	0	0	0	0	0	0	0	0	0
ASV1455	Stramenopila	Heterokontophyta	Oomycetes	Peronosporales	Peronosporaceae	Phytophthora	Phytophthora hibernalis	0	0	0	0	0	0	0	0	0	0	0	0	0	0	0	0	0	0	0	0	0	0	0	0	0	0	0	0	0	121	0	0	0	0	0	0	0	0	0	0	0	0
ASV1456	Stramenopila	Heterokontophyta	Oomycetes	Leptomitales		Apodachlya	Apodachlya brachynema	0	0	0	74	0	0	0	0	0	0	0	0	0	0	0	0	0	0	0	0	58	0	0	0	0	0	0	0	0	0	0	0	0	0	0	0	0	0	0	0	0	0
ASV1457	Stramenopila	Heterokontophyta	Oomycetes	Pythiales	Pythiaceae	Globisporangium	Globisporangium intermedium	0	0	0	0	0	0	0	132	0	0	0	0	0	0	0	0	0	0	0	0	0	0	0	0	0	0	0	0	0	0	0	0	0	0	0	0	0	0	0	0	0	0
ASV1458	Fungi	'uncultured fungus'	'uncultured fungus'	'uncultured fungus'	'uncultured fungus'	'uncultured fungus'	uncultured fungus	0	0	0	0	0	0	0	0	0	0	0	0	0	0	0	0	0	0	0	0	0	0	0	0	0	0	0	0	0	0	0	0	0	0	0	0	0	0	0	0	0	0
ASV1459	Metazoa	Chordata	Mammalia	Primates	Hominidae	Homo	Homo sapiens	0	0	0	0	0	0	0	0	0	0	0	0	0	0	0	0	0	0	0	0	0	0	0	0	0	0	0	0	0	0	0	0	0	0	0	0	0	0	0	0	0	0
ASV1460	Fungi	'uncultured fungus'	'uncultured fungus'	'uncultured fungus'	'uncultured fungus'	'uncultured fungus'	uncultured fungus	0	0	0	0	0	0	0	0	0	0	0	0	0	0	0	0	0	0	0	0	0	0	0	0	0	0	0	0	0	0	0	0	0	0	0	0	0	0	0	0	0	0
ASV1461			Chrysophyceae	Chromulinales	Chromulinaceae	Spumella	Spumella vulgaris	0	0	0	0	0	0	0	0	0	0	0	0	0	0	0	0	0	0	0	0	0	0	0	0	0	0	0	0	0	0	0	0	0	0	0	0	0	0	0	0	0	0
ASV1462			Chrysophyceae	Chromulinales	Chromulinaceae	Spumella	Spumella sp.	0	0	0	0	0	0	0	0	0	0	0	0	0	0	0	0	0	0	0	0	0	0	0	0	0	0	0	0	0	0	0	0	0	0	0	0	0	0	0	0	0	0
ASV1463	Stramenopila	Heterokontophyta	Oomycetes	Peronosporales	Peronosporaceae	Peronospora	Peronospora myosotidis	0	0	0	0	0	0	0	0	0	0	0	0	0	0	0	0	0	0	0	0	0	0	0	0	0	0	0	0	0	0	0	0	0	0	0	0	0	0	0	0	0	0
ASV1464			Chrysophyceae	Chromulinales	Chromulinaceae	Spumella	Spumella sp.	0	0	0	0	0	0	0	0	0	0	0	0	0	0	0	0	0	0	0	0	0	0	0	0	0	0	0	0	0	0	0	0	0	0	0	0	0	0	0	0	0	0
ASV1465	Fungi	'uncultured fungus'	'uncultured fungus'	'uncultured fungus'	'uncultured fungus'	'uncultured fungus'	uncultured fungus	0	0	0	0	0	0	0	0	0	0	0	0	0	0	0	0	0	0	0	0	0	0	0	0	0	0	0	0	45	0	0	0	0	0	0	49	24	0	0	0	0	0
ASV1466	Stramenopila	Heterokontophyta	Oomycetes	Pythiales	Pythiaceae	Pythium	Pythium okanoganense	0	0	0	0	9	0	0	0	121	0	0	0	0	0	0	0	0	0	0	0	0	0	0	0	0	0	0	0	0	0	0	0	0	0	0	0	0	0	0	0	0	0
ASV1467	Stramenopila	Heterokontophyta	Oomycetes	Saprolegniales	Saprolegniaceae	Achlya	Achlya bisexualis	0	0	0	0	0	0	0	0	0	0	0	0	0	130	0	0	0	0	0	0	0	0	0	0	0	0	0	0	0	0	0	0	0	0	0	0	0	0	0	0	0	0
ASV1468		'uncultured eukaryote'	'uncultured eukaryote'	'uncultured eukaryote'	'uncultured eukaryote'	'uncultured eukaryote'	uncultured eukaryote	0	0	0	0	0	0	0	0	0	0	0	0	0	0	0	0	0	0	0	0	0	0	0	0	0	0	0	0	0	0	0	0	0	0	0	0	0	0	0	0	0	0
ASV1469			Chrysophyceae	Chromulinales	Chromulinaceae	'Spumella-like'	Spumella-like flagellate 1006	0	0	0	0	0	0	0	0	0	0	0	0	0	0	0	0	0	0	0	0	0	0	0	0	0	0	0	0	0	0	0	0	0	0	0	0	0	0	0	0	0	0
ASV1470	Stramenopila	Heterokontophyta	Oomycetes	Pythiales	Pythiaceae	Pythium	Pythium aff. macrosporum	0	0	0	0	20	0	0	0	19	0	0	0	0	0	0	0	0	0	0	0	0	0	0	0	0	0	0	0	0	0	0	0	0	0	0	0	0	0	0	0	0	0
ASV1471		Bacillariophyta	Bacillariophyceae	Naviculales	Naviculaceae	Navicula	Navicula trivialis	0	0	0	0	0	0	0	0	129	0	0	0	0	0	0	0	0	0	0	0	0	0	0	0	0	0	0	0	0	0	0	0	0	0	0	0	0	0	0	0	0	0
ASV1472	Stramenopila	Heterokontophyta	Oomycetes	Pythiales	Pythiaceae	Globisporangium	Globisporangium intermedium	0	0	0	0	0	0	0	0	0	0	0	0	0	0	0	0	0	0	0	0	0	0	0	0	0	0	0	0	0	0	0	0	0	0	0	0	0	0	0	0	0	0
ASV1473	Stramenopila	Heterokontophyta	Oomycetes	Pythiales	Pythiaceae	Pythium	Pythium oligandrum	0	0	0	0	0	0	0	0	0	0	0	0	0	0	0	0	0	0	0	0	0	0	0	0	0	0	0	0	0	0	0	0	0	0	0	0	0	0	0	0	0	0
ASV1474		Bacillariophyta	'uncultured freshwater diatom'	'uncultured freshwater diatom'	'uncultured freshwater diatom'	'uncultured freshwater diatom'	uncultured freshwater diatom	0	0	0	0	0	0	0	0	0	0	0	0	0	0	0	0	0	0	0	0	0	0	0	0	0	0	0	0	0	0	0	0	0	0	0	0	0	0	0	0	0	0
ASV1475	Stramenopila	Heterokontophyta	Oomycetes	Pythiales	Pythiaceae	Globisporangium	Globisporangium intermedium	0	0	0	0	0	0	0	0	0	0	0	0	0	0	0	0	0	0	0	0	0	0	0	0	0	0	0	0	0	0	0	0	0	0	0	0	0	0	0	0	0	0
ASV1476			Chrysophyceae	Chromulinales	Chromulinaceae	Spumella	Spumella vulgaris	0	0	0	0	0	0	0	0	0	0	0	0	0	0	0	0	0	0	0	0	0	0	0	0	0	0	0	0	0	0	0	0	0	0	0	0	0	0	0	0	0	0
ASV1477			Dinophyceae	Prorocentrales	Prorocentraceae	Prorocentrum	Prorocentrum micans	0	0	0	0	0	3	0	0	0	0	0	0	0	0	0	0	0	0	0	0	0	0	0	0	0	0	0	0	0	0	0	0	0	0	0	0	0	0	0	0	0	0
ASV1478	Stramenopila	Heterokontophyta	Oomycetes	Pythiales	Pythiaceae	Pythium	Pythium okanoganense	0	0	0	0	0	0	0	0	0	0	0	0	0	0	0	0	0	0	0	0	0	0	0	0	0	0	0	0	0	0	0	62	0	0	0	0	0	0	0	0	0	0
ASV1479		'uncultured eukaryote'	'uncultured eukaryote'	'uncultured eukaryote'	'uncultured eukaryote'	'uncultured eukaryote'	uncultured eukaryote	0	0	0	80	0	0	0	0	0	0	0	0	0	0	0	0	0	0	0	0	0	0	0	0	0	0	0	0	0	0	0	0	0	0	0	0	0	0	0	0	0	0
ASV1480	Stramenopila	Heterokontophyta	Oomycetes	Saprolegniales	Saprolegniaceae	Achlya	Achlya bisexualis	0	0	0	0	0	0	0	0	0	0	0	0	0	128	0	0	0	0	0	0	0	0	0	0	0	0	0	0	0	0	0	0	0	0	0	0	0	0	0	0	0	0
ASV1481	Stramenopila	Heterokontophyta	Oomycetes	Pythiales	Pythiogetonaceae	Pythiogeton	Pythiogeton uniforme	0	0	0	0	0	0	0	0	0	0	0	0	0	0	0	0	0	0	0	0	0	0	0	0	0	0	0	0	0	0	0	0	0	0	0	0	0	0	0	0	0	0
ASV1482			Chrysophyceae	Chromulinales	Chromulinaceae	Spumella	Spumella sp.	0	0	0	0	0	0	0	0	0	0	0	0	0	0	0	0	0	0	0	0	0	0	0	0	0	0	0	0	0	0	0	0	0	0	0	0	0	0	0	0	0	0
ASV1483	Stramenopila	Heterokontophyta	Oomycetes	Pythiales	Pythiaceae	Pythium	Pythium torulosum	0	0	0	0	0	0	0	0	0	0	0	0	0	0	0	0	0	0	0	0	0	0	0	0	0	0	0	0	0	0	0	0	0	0	0	0	0	0	0	0	0	0
ASV1484	Stramenopila	Heterokontophyta	Oomycetes	Pythiales	Pythiaceae	Pythium	Pythium oligandrum	0	0	0	0	0	0	0	0	0	0	0	0	0	0	0	0	0	0	0	0	0	0	0	0	0	0	0	0	0	0	0	0	0	0	0	0	0	0	0	0	0	0
ASV1485	Stramenopila	Heterokontophyta	Oomycetes	Pythiales	Pythiaceae	Pythium	Pythium monospermum	127	0	0	0	0	0	0	0	0	0	0	0	0	0	0	0	0	0	0	0	0	0	0	0	0	0	0	0	0	0	0	0	0	0	0	0	0	0	0	0	0	0
ASV1486	Stramenopila	Heterokontophyta	Oomycetes	Pythiales	Pythiaceae	Pythium	Pythium polymastum	0	0	0	0	0	0	0	0	0	0	0	0	0	0	0	0	0	0	0	0	0	0	0	0	127	0	0	0	0	0	0	0	0	0	0	0	0	0	0	0	0	0
ASV1487	Stramenopila	Heterokontophyta	Oomycetes		Lagenaceae	Lagena	Lagena radicicola	0	0	0	0	0	0	0	0	0	0	0	0	0	0	0	0	0	0	0	0	0	0	0	0	0	0	0	0	0	127	0	0	0	0	0	0	0	0	0	0	0	0
ASV1488	Fungi	'uncultured fungus'	'uncultured fungus'	'uncultured fungus'	'uncultured fungus'	'uncultured fungus'	uncultured fungus	0	0	0	0	0	0	0	0	0	0	0	0	0	0	0	0	0	0	0	0	0	0	0	0	0	0	0	0	0	0	0	0	0	0	0	0	0	0	0	66	0	0
ASV1489			Dinophyceae	Prorocentrales	Prorocentraceae	Prorocentrum	Prorocentrum micans	0	0	0	0	0	0	0	0	0	0	0	0	0	0	0	0	0	0	0	0	0	0	0	0	0	0	0	0	0	0	0	0	0	0	0	0	0	0	0	0	0	0
ASV1490	Stramenopila	Heterokontophyta	Oomycetes	Pythiales	Pythiaceae	Pythium	Pythium pleroticum	0	0	0	0	0	0	0	0	0	0	0	0	0	0	0	0	0	0	0	0	0	0	0	0	0	0	0	0	0	0	0	0	0	0	0	0	0	0	0	0	0	0
ASV1491	Stramenopila	Heterokontophyta	Oomycetes	Pythiales	Pythiaceae	Pythium	Pythium sylvaticum	0	0	0	0	0	0	0	0	0	0	0	0	0	0	0	0	0	0	0	0	0	0	0	0	0	0	0	0	0	0	0	0	0	0	0	0	0	0	0	0	0	0
ASV1492	Stramenopila	Heterokontophyta	Oomycetes	Pythiales	Pythiaceae	Pythium	Pythium acanthicum	0	0	0	0	0	0	0	0	0	0	0	0	0	0	0	0	0	0	0	0	0	0	0	0	0	0	0	0	0	0	0	0	0	0	0	0	0	0	0	0	0	0
ASV1493	Viridiplantae	Streptophyta	Magnoliopsida	Fabales	Fabaceae	Dalbergia	Dalbergia cultrata	0	0	0	0	0	0	0	0	0	0	0	0	0	0	0	0	0	0	0	0	0	0	0	0	0	0	0	0	81	0	0	0	0	0	0	0	0	0	0	0	0	0
ASV1494	Stramenopila	Heterokontophyta	Oomycetes	Pythiales	Pythiaceae	Pythium	Pythium pleroticum	0	0	0	0	0	0	0	0	0	0	0	0	0	0	0	0	0	0	0	0	0	0	0	0	0	0	0	0	0	0	0	0	0	0	0	78	22	0	0	0	0	0
ASV1495	Stramenopila	Heterokontophyta	Oomycetes	Pythiales	Pythiaceae	Globisporangium	Globisporangium spinosum	0	0	0	0	0	0	0	0	0	0	0	0	0	0	0	0	0	0	0	0	0	0	0	0	0	0	0	0	0	0	0	0	0	0	0	0	0	0	0	0	0	0
ASV1496	Viridiplantae	Streptophyta	Magnoliopsida	Caryophyllales	Chenopodiaceae	Beta	Beta vulgaris	0	0	0	0	0	0	0	0	0	0	0	0	0	0	0	0	0	0	0	0	0	0	0	0	0	0	0	0	0	0	0	0	0	0	0	0	0	0	0	0	0	0
ASV1497	Stramenopila	Heterokontophyta	Oomycetes	Pythiales	Pythiogetonaceae	Pythiogeton	Pythiogeton uniforme	0	0	0	0	0	0	0	0	0	0	0	0	0	0	0	0	0	0	0	0	0	0	0	0	0	0	0	0	0	0	0	0	0	0	0	0	0	0	0	0	0	0
ASV1498	Metazoa	Nematoda	Enoplea	Trichinellida	Trichinellidae	Trichinella	Trichinella spiralis	0	0	0	0	0	0	0	0	0	0	0	0	0	0	0	0	0	0	0	0	0	0	0	0	0	0	0	0	0	0	0	0	0	0	0	0	0	0	0	0	0	0
ASV1499	Fungi	'uncultured fungus'	'uncultured fungus'	'uncultured fungus'	'uncultured fungus'	'uncultured fungus'	uncultured fungus	0	0	0	0	0	0	0	0	0	0	0	0	9	116	0	0	0	0	0	0	0	0	0	0	0	0	0	0	0	0	0	0	0	0	0	0	0	0	0	0	0	0
ASV1500		Planctomycetes					Planctomycetes bacterium V202	0	0	0	0	0	0	0	0	0	0	0	0	0	0	0	0	0	0	0	0	0	0	0	0	0	0	0	0	0	0	0	125	0	0	0	0	0	0	0	0	0	0
ASV1501			Chrysophyceae	Chromulinales	Chromulinaceae	'Spumella-like'	Spumella-like flagellate 391f	0	0	0	0	0	0	0	0	0	0	0	0	0	0	0	0	0	0	0	0	0	0	0	0	0	0	0	0	0	0	0	0	0	0	0	0	0	0	0	0	0	0
ASV1502	Stramenopila	Heterokontophyta	Oomycetes	Myzocytiopsidales	Myzocytiopsidaceae	Myzocytiopsis	Myzocytiopsis glutinospora	0	0	0	0	0	0	0	0	0	0	0	0	0	0	0	0	0	0	0	0	0	0	0	0	0	0	0	0	0	0	0	0	0	0	0	0	0	0	0	0	0	0
ASV1503	Fungi	'uncultured fungus'	'uncultured fungus'	'uncultured fungus'	'uncultured fungus'	'uncultured fungus'	uncultured fungus	0	0	0	0	0	0	0	0	0	0	0	0	0	0	0	0	0	0	0	0	0	0	0	0	0	0	0	0	0	0	0	0	0	0	0	0	0	0	0	0	0	0
ASV1504		Tenericutes	Mollicutes	Entomoplasmatales	Entomoplasmataceae	Mesoplasma	Mesoplasma tabanidae	0	0	0	0	0	0	0	0	0	0	0	0	0	0	0	0	0	0	0	0	0	0	0	0	0	0	0	0	0	0	0	0	0	0	0	0	0	0	0	0	0	0
ASV1505		'uncultured eukaryote'	'uncultured eukaryote'	'uncultured eukaryote'	'uncultured eukaryote'	'uncultured eukaryote'	uncultured eukaryote	0	0	0	0	0	0	0	0	0	0	0	0	0	0	0	0	0	0	0	0	0	0	0	0	0	0	0	0	0	0	0	0	0	0	0	0	0	0	0	0	0	0
ASV1506		'uncultured eukaryote'	'uncultured eukaryote'	'uncultured eukaryote'	'uncultured eukaryote'	'uncultured eukaryote'	uncultured eukaryote	0	0	0	0	0	0	0	0	0	0	0	0	0	0	0	0	0	0	0	0	0	0	0	0	0	0	0	0	0	0	0	0	0	0	0	0	0	0	0	0	0	0
ASV1507			Chrysophyceae			'Spumella-like'	Spumella-like flagellate JBL14	5	0	0	0	0	0	0	0	14	0	0	0	0	0	0	0	0	0	0	0	0	0	0	0	0	0	0	0	0	0	0	0	0	0	0	0	0	0	0	0	0	0
ASV1508	Stramenopila	Heterokontophyta	Oomycetes	Saprolegniales	Saprolegniaceae	Pythiopsis	Pythiopsis terrestris	0	28	0	0	30	0	0	0	0	0	0	0	0	0	0	0	0	0	0	0	0	0	0	0	40	0	0	0	0	0	0	0	0	0	0	0	0	0	0	0	0	0
ASV1509		Apicomplexa	Aconoidasida	Haemosporida	Plasmodiidae	Plasmodium	Plasmodium falciparum	0	0	0	0	0	0	0	0	0	0	124	0	0	0	0	0	0	0	0	0	0	0	0	0	0	0	0	0	0	0	0	0	0	0	0	0	0	0	0	0	0	0
ASV1510	Stramenopila	Heterokontophyta	Oomycetes	Pythiales	Pythiaceae	Pythium	Pythium aff. torulosum	0	0	0	0	0	0	0	0	0	0	0	0	0	0	0	0	0	0	0	0	0	0	0	0	0	0	0	0	0	0	0	23	0	0	0	0	0	0	0	0	0	0
ASV1511	Stramenopila	Heterokontophyta	Oomycetes	Peronosporales	Peronosporaceae	Phytophthora	Phytophthora citrophthora	0	0	0	0	0	0	0	0	0	0	0	0	0	0	0	0	0	0	124	0	0	0	0	0	0	0	0	0	0	0	0	0	0	0	0	0	0	0	0	0	0	0
ASV1512	Metazoa	Chordata	Actinopteri	Cypriniformes	Cyprinidae	Cyprinus	Cyprinus carpio	0	0	0	0	0	0	0	0	0	0	0	0	0	0	0	0	0	0	0	0	0	0	0	0	0	0	0	0	0	0	0	0	0	0	0	123	0	0	0	0	0	0
ASV1513			Chrysophyceae	Chromulinales	Chromulinaceae	Spumella	Spumella vulgaris	0	0	0	0	0	0	0	0	0	0	0	0	0	0	0	0	0	0	0	0	0	0	0	0	0	0	0	0	0	0	0	0	0	0	0	57	0	0	0	0	0	0
ASV1514			Chrysophyceae	Chromulinales	Chromulinaceae	'Spumella-like'	Spumella-like flagellate 391f	0	0	0	0	0	0	0	0	0	0	0	0	0	0	0	0	0	0	0	0	0	0	0	0	0	0	0	0	0	0	0	0	0	0	0	0	0	0	0	0	0	11
ASV1515	Stramenopila	Heterokontophyta	Oomycetes	Pythiales	Pythiaceae	Pythium	Pythium radiosum	0	0	0	0	0	0	0	0	0	0	0	0	0	0	0	0	0	0	0	0	0	0	0	0	0	0	0	0	0	0	0	0	0	0	0	0	0	0	0	0	0	0
ASV1516	Stramenopila	Heterokontophyta	Oomycetes	Pythiales	Pythiaceae	Pythium	Pythium pleroticum	0	0	0	0	0	0	0	0	123	0	0	0	0	0	0	0	0	0	0	0	0	0	0	0	0	0	0	0	0	0	0	0	0	0	0	0	0	0	0	0	0	0
ASV1517	Metazoa	Chordata	Actinopteri	Salmoniformes	Salmonidae	Salmo	Salmo trutta	0	0	0	0	0	0	0	0	0	0	0	0	0	0	0	0	0	0	0	0	0	0	0	0	0	0	0	0	0	0	0	0	0	0	0	0	0	0	0	0	0	0
ASV1518	Fungi	'uncultured fungus'	'uncultured fungus'	'uncultured fungus'	'uncultured fungus'	'uncultured fungus'	uncultured fungus	0	0	0	0	0	0	0	0	0	0	0	0	0	0	0	0	0	0	0	0	0	0	0	0	0	0	0	0	0	0	0	0	0	0	0	0	0	0	0	0	0	0
ASV1519	Stramenopila	Heterokontophyta	Oomycetes	Pythiales	Pythiaceae	Globisporangium	Globisporangium splendens	0	0	0	0	0	0	0	0	0	0	0	0	0	0	0	0	0	0	0	0	0	0	0	0	0	0	0	0	0	0	0	0	0	0	0	0	0	0	0	0	0	0
ASV1520	Stramenopila	Heterokontophyta	Oomycetes	Pythiales	Pythiaceae	Pythium	Pythium oligandrum	0	0	0	0	0	0	0	0	0	0	0	0	0	0	0	0	0	0	0	0	0	0	0	0	0	0	0	0	0	0	0	0	0	0	0	0	0	0	0	0	0	0
ASV1521	Stramenopila	Heterokontophyta	Oomycetes	Pythiales	Pythiaceae	Globisporangium	Globisporangium intermedium	0	0	0	0	0	7	0	0	0	0	0	0	0	0	0	0	0	0	0	0	0	0	0	0	0	0	0	0	0	0	0	0	0	0	0	0	0	0	0	0	0	0
ASV1522			Chrysophyceae	Chromulinales	Chromulinaceae	'Spumella-like'	Spumella-like flagellate 1006	0	0	0	0	0	0	0	0	0	0	0	0	0	0	0	0	0	0	0	0	0	0	0	0	0	0	32	0	0	0	0	23	0	0	0	15	0	0	0	0	0	0
ASV1523			Chrysophyceae	Chromulinales	Chromulinaceae	Pedospumella	Pedospumella sp. JBM19	0	0	24	0	0	0	0	0	0	0	0	0	0	0	0	0	0	0	0	18	0	0	0	0	0	0	0	0	0	0	24	0	0	0	0	32	0	0	0	0	0	0
ASV1524	Stramenopila	Heterokontophyta	Oomycetes	Saprolegniales	Saprolegniaceae	Saprolegnia	Saprolegnia terrestris	0	0	0	0	22	0	0	100	0	0	0	0	0	0	0	0	0	0	0	0	0	0	0	0	0	0	0	0	0	0	0	0	0	0	0	0	0	0	0	0	0	0
ASV1525	Stramenopila	Heterokontophyta	Oomycetes	Pythiales	Pythiaceae	Pythium	Pythium irregulare	0	0	0	0	0	0	0	0	0	0	0	0	0	0	0	0	0	0	0	122	0	0	0	0	0	0	0	0	0	0	0	0	0	0	0	0	0	0	0	0	0	0
ASV1526	Fungi	'uncultured fungus'	'uncultured fungus'	'uncultured fungus'	'uncultured fungus'	'uncultured fungus'	uncultured fungus	0	0	0	0	0	0	0	0	0	0	0	0	0	0	0	0	0	0	0	0	0	0	0	0	0	0	0	0	0	0	0	0	0	0	0	2	0	0	0	0	0	0
ASV1527	Stramenopila	Heterokontophyta	Oomycetes	Pythiales	Pythiaceae	Pythium	Pythium polymastum	0	0	0	0	0	0	0	0	0	0	0	0	0	0	0	0	0	0	0	0	0	0	0	0	0	0	0	0	0	0	0	0	0	0	0	0	0	0	0	0	0	0
ASV1528	Fungi	'uncultured fungus'	'uncultured fungus'	'uncultured fungus'	'uncultured fungus'	'uncultured fungus'	uncultured fungus	0	0	0	0	0	0	0	0	0	0	0	0	0	0	0	0	0	0	0	0	0	0	0	0	0	0	0	0	0	0	0	0	0	0	0	0	0	0	0	0	0	0
ASV1529	Stramenopila	Heterokontophyta	Oomycetes	Pythiales	'uncultured Pythium'	'uncultured Pythium'	uncultured Pythium	0	0	0	42	0	0	0	0	0	0	0	0	0	0	0	0	0	0	0	0	0	0	0	0	0	0	0	0	0	0	0	0	0	0	0	0	0	0	0	0	0	0
ASV1530			Chrysophyceae	Chromulinales	Chromulinaceae	'Spumella-like'	Spumella-like flagellate Got220	121	0	0	0	0	0	0	0	0	0	0	0	0	0	0	0	0	0	0	0	0	0	0	0	0	0	0	0	0	0	0	0	0	0	0	0	0	0	0	0	0	0
ASV1531	Stramenopila	Heterokontophyta	Oomycetes	Lagenidiales		Paralagenidium	Paralagenidium karlingii	0	0	0	121	0	0	0	0	0	0	0	0	0	0	0	0	0	0	0	0	0	0	0	0	0	0	0	0	0	0	0	0	0	0	0	0	0	0	0	0	0	0
ASV1532	Viridiplantae	Streptophyta	Magnoliopsida	Brassicales	Brassicaceae	Arabidopsis	Arabidopsis thaliana	0	0	0	0	0	0	0	0	0	0	0	0	0	0	0	0	0	0	0	0	0	82	39	0	0	0	0	0	0	0	0	0	0	0	0	0	0	0	0	0	0	0
ASV1533			Chrysophyceae	Chromulinales	Chromulinaceae	'Spumella-like'	Spumella-like flagellate 1006	0	0	0	0	0	0	0	0	0	0	0	0	0	0	0	0	0	0	0	0	0	0	0	0	0	0	0	0	0	0	0	0	0	0	0	0	86	0	0	0	0	0
ASV1534	Fungi	'uncultured fungus'	'uncultured fungus'	'uncultured fungus'	'uncultured fungus'	'uncultured fungus'	uncultured fungus	0	0	0	0	0	0	0	0	0	0	0	0	0	0	0	0	0	0	0	0	0	0	0	0	0	0	0	0	0	0	0	0	0	0	0	0	0	0	0	0	0	0
ASV1535			Chrysophyceae	Chromulinales	Chromulinaceae	'Spumella-like'	Spumella-like flagellate 1031	0	0	0	0	0	0	0	0	0	0	0	0	0	0	0	0	0	0	0	0	0	0	0	0	0	0	0	0	0	0	0	0	0	0	0	0	0	0	0	0	0	0
ASV1536	Stramenopila	Heterokontophyta	Oomycetes	Pythiales	Pythiaceae	Pythium	Pythium oligandrum	0	0	0	0	0	0	0	0	0	0	0	0	0	0	0	0	0	0	0	0	0	0	0	0	0	0	0	0	0	0	0	0	0	0	0	0	0	0	0	0	0	0
ASV1537	Stramenopila	Heterokontophyta	Oomycetes	Saprolegniales	Saprolegniaceae	Aphanomyces	Aphanomyces frigidophilus	0	0	0	0	0	0	0	0	0	0	0	0	0	0	0	0	0	0	0	0	0	0	0	0	0	0	0	0	0	0	0	0	0	0	0	0	0	0	0	0	0	0
ASV1538		Bacillariophyta	Bacillariophyceae	Naviculales	Naviculaceae	Navicula	Navicula trivialis	0	0	0	0	16	0	0	0	0	0	0	0	0	0	0	0	0	0	0	0	0	0	0	0	0	0	0	0	0	0	0	0	0	0	0	0	0	0	0	0	0	0
ASV1539			Chrysophyceae			'Spumella-like'	Spumella-like flagellate JBL14	0	6	0	0	4	0	0	0	0	19	0	0	0	0	0	0	0	0	0	0	0	0	0	0	0	0	0	0	0	0	0	0	0	0	0	0	0	0	0	0	0	13
ASV1540	Metazoa	Chordata	Actinopteri		Pomacentridae	Amphiprion	Amphiprion ocellaris	0	0	0	0	0	0	0	0	0	0	0	0	0	0	0	0	0	0	0	0	0	0	120	0	0	0	0	0	0	0	0	0	0	0	0	0	0	0	0	0	0	0
ASV1541	Stramenopila	Heterokontophyta	Oomycetes	Pythiales	Pythiaceae	Pythium	Pythium radiosum	0	0	0	0	0	0	0	0	0	0	0	0	0	0	0	0	0	0	0	0	0	0	0	0	0	0	0	0	0	0	0	0	0	0	0	0	0	0	0	0	0	0
ASV1542	Stramenopila	Heterokontophyta	Oomycetes	Pythiales	Pythiaceae	Pythium	Pythium sp. unique1	0	0	0	0	0	0	0	0	0	0	0	0	0	0	0	0	0	0	0	0	0	0	0	0	0	0	0	0	0	0	0	0	0	0	0	0	0	0	0	0	0	0
ASV1543	Fungi	'uncultured fungus'	'uncultured fungus'	'uncultured fungus'	'uncultured fungus'	'uncultured fungus'	uncultured fungus	0	0	0	0	0	0	0	0	0	0	0	0	0	0	0	0	0	0	0	0	0	0	0	0	0	0	0	0	0	0	0	0	0	0	0	0	0	0	0	0	0	0
ASV1544	Stramenopila	Heterokontophyta	Oomycetes	Pythiales	Pythiaceae	Pythium	Pythium oligandrum	0	0	0	0	0	0	0	0	0	0	0	0	0	0	0	0	0	0	0	0	0	0	0	0	0	0	0	0	0	0	0	0	0	0	0	0	0	0	0	0	0	0
ASV1545			Chrysophyceae	Chromulinales	Chromulinaceae	'Spumella-like'	Spumella-like flagellate Got220	0	0	18	0	0	0	0	0	0	0	0	0	0	0	0	0	0	0	0	0	0	0	0	0	0	0	0	0	0	0	0	0	0	0	0	0	0	0	0	0	0	0
ASV1546	Stramenopila	Heterokontophyta	Oomycetes	Myzocytiopsidales	Myzocytiopsidaceae	Myzocytiopsis	Myzocytiopsis osiris	0	0	0	0	0	0	0	101	0	0	0	0	0	0	0	0	0	0	0	0	0	0	0	0	0	0	0	0	0	0	0	0	0	0	0	0	0	0	0	0	0	0
ASV1547	Metazoa	Arthropoda	Insecta	Hymenoptera	Apidae	Apis	Apis dorsata	0	0	0	0	0	0	0	0	0	0	0	0	0	0	0	0	0	0	0	0	0	0	119	0	0	0	0	0	0	0	0	0	0	0	0	0	0	0	0	0	0	0
ASV1548	Stramenopila	Heterokontophyta	Oomycetes	Pythiales	Pythiaceae	Pythium	Pythium sp. C73	0	0	0	0	0	0	0	0	0	0	0	0	0	0	0	0	0	0	0	0	0	0	0	0	0	0	0	0	0	0	0	0	0	0	0	0	0	0	0	0	0	0
ASV1549			Chrysophyceae	Chromulinales	Chromulinaceae	Spumella	Spumella sp.	0	0	0	0	0	0	0	0	0	0	0	0	0	0	0	0	0	0	0	0	0	0	0	0	0	0	0	0	0	0	0	0	0	0	0	0	0	0	0	0	0	0
ASV1550			Dinophyceae	Prorocentrales	Prorocentraceae	Prorocentrum	Prorocentrum micans	0	0	0	0	0	0	0	0	0	0	0	0	0	0	0	0	0	0	0	0	0	0	0	0	0	0	0	0	0	0	0	0	0	0	0	0	0	0	0	0	0	0
ASV1551	Stramenopila	Heterokontophyta	Oomycetes	Pythiales	Pythiaceae	Globisporangium	Globisporangium spinosum	0	0	0	0	0	0	0	0	0	0	0	0	0	0	0	0	0	0	0	0	0	0	0	0	0	0	0	0	0	0	0	0	0	0	0	0	0	0	0	0	0	0
ASV1552	Fungi	'uncultured fungus'	'uncultured fungus'	'uncultured fungus'	'uncultured fungus'	'uncultured fungus'	uncultured fungus	0	0	0	0	0	0	0	0	0	0	0	0	0	0	0	0	0	0	0	0	0	0	0	0	0	0	0	0	0	0	0	0	0	0	0	0	0	0	0	0	0	0
ASV1553	Fungi	'uncultured fungus'	'uncultured fungus'	'uncultured fungus'	'uncultured fungus'	'uncultured fungus'	uncultured fungus	0	0	0	0	0	0	0	0	0	0	0	0	0	0	0	0	0	2	0	0	0	0	0	0	0	0	0	0	0	0	0	0	0	0	0	0	0	0	0	23	93	0
ASV1554		Proteobacteria	Oligoflexia	Bacteriovoracales	Bacteriovoracaceae	Bacteriovorax	Bacteriovorax stolpii	0	0	0	0	0	0	0	0	0	0	0	26	0	0	0	0	0	0	0	0	0	0	0	0	0	0	0	0	0	0	0	0	0	0	0	0	0	20	0	0	0	0
ASV1555	Fungi	'uncultured fungus'	'uncultured fungus'	'uncultured fungus'	'uncultured fungus'	'uncultured fungus'	uncultured fungus	0	0	0	0	0	0	58	0	0	0	0	0	0	0	0	0	0	0	0	0	0	0	0	0	0	0	0	0	0	0	0	0	0	0	0	0	0	0	0	0	0	0
ASV1556	Stramenopila	Heterokontophyta	Oomycetes	Pythiales	Pythiaceae	Pythium	Pythium longipapillum	0	0	0	0	0	0	0	0	0	0	0	0	0	0	0	0	0	0	0	0	0	0	0	0	0	0	0	0	0	0	0	0	118	0	0	0	0	0	0	0	0	0
ASV1557	Viridiplantae	Streptophyta	Magnoliopsida	Malpighiales	Salicaceae	Populus	Populus trichocarpa	0	0	0	0	0	0	0	0	0	0	0	0	0	0	0	0	0	0	0	0	0	0	0	0	0	0	0	0	0	0	0	0	0	0	0	0	0	0	0	0	0	0
ASV1558	Stramenopila	Heterokontophyta	Oomycetes	Pythiales	Pythiaceae	Globisporangium	Globisporangium intermedium	0	0	0	0	0	0	0	0	0	0	0	0	0	0	0	0	0	0	0	0	0	0	0	0	0	0	0	0	0	0	0	0	0	0	0	0	0	0	0	0	0	0
ASV1559	Stramenopila	Heterokontophyta	Oomycetes	Pythiales	Pythiaceae	Pythium	Pythium oligandrum	0	0	0	0	0	0	0	0	0	0	0	0	0	0	0	0	0	0	0	0	0	0	0	0	0	0	0	0	0	0	0	0	0	0	0	0	0	0	0	0	0	0
ASV1560		Bacillariophyta	Bacillariophyceae	Surirellales	Surirellaceae	Surirella	Surirella sp. CCAP 1071/2	0	0	0	0	0	0	0	0	0	117	0	0	0	0	0	0	0	0	0	0	0	0	0	0	0	0	0	0	0	0	0	0	0	0	0	0	0	0	0	0	0	0
ASV1561	Stramenopila	Heterokontophyta	Oomycetes	Pythiales	Pythiaceae	Pythium	Pythium attrantheridium	0	0	0	0	0	0	0	0	0	0	0	0	0	0	0	0	0	0	0	0	0	0	0	0	0	0	0	0	0	117	0	0	0	0	0	0	0	0	0	0	0	0
ASV1562	Stramenopila	Heterokontophyta	Oomycetes	Pythiales	Pythiaceae	Pythium	Pythium polymastum	0	0	0	0	0	0	0	0	0	0	0	0	0	0	0	0	0	0	0	0	0	0	0	0	0	0	0	0	0	0	0	0	117	0	0	0	0	0	0	0	0	0
ASV1563	Stramenopila	Heterokontophyta	Oomycetes	Pythiales	Pythiaceae	Pythium	Pythium aff. monospermum	0	0	0	0	0	0	0	0	0	0	0	0	0	0	0	0	0	0	0	0	0	0	0	0	0	0	0	0	0	0	0	0	0	0	0	0	0	0	0	0	0	0
ASV1564	Stramenopila	Heterokontophyta	Oomycetes	Pythiales	Pythiaceae	Pythium	Pythium pleroticum	0	0	0	0	0	0	0	0	0	0	0	0	0	0	0	0	0	0	0	0	0	0	0	0	0	0	0	0	0	0	0	0	0	0	0	0	0	0	0	0	0	0
ASV1565	Viridiplantae	Streptophyta	Magnoliopsida	Brassicales	Brassicaceae	Arabis	Arabis alpina	0	0	0	0	0	0	0	0	0	0	0	0	0	0	0	0	0	0	0	0	0	0	0	0	0	0	0	0	0	0	0	0	0	0	0	0	0	0	0	0	0	0
ASV1566		Apicomplexa	Aconoidasida	Haemosporida	Plasmodiidae	Plasmodium	Plasmodium vivax	0	0	0	0	0	0	0	0	0	0	0	0	0	0	0	0	0	0	0	0	0	0	0	0	0	0	0	0	0	0	0	0	0	0	0	0	0	0	0	0	0	0
ASV1567			Chrysophyceae	Chromulinales	Chromulinaceae	'Spumella-like'	Spumella-like flagellate 1006	0	0	0	0	0	0	0	0	0	0	0	0	0	0	0	0	0	0	0	0	0	0	0	0	0	0	0	0	0	0	0	0	0	0	0	0	0	0	0	0	0	0
ASV1568	Stramenopila	Heterokontophyta	Oomycetes	Saprolegniales	Saprolegniaceae	Aphanomyces	Aphanomyces euteiches	0	0	0	0	0	0	0	0	0	0	0	0	0	0	0	0	0	0	0	0	0	0	0	0	0	0	0	0	0	0	0	0	0	0	0	0	0	0	0	0	0	0
ASV1569	Stramenopila	Heterokontophyta	Oomycetes	Pythiales	Pythiogetonaceae	Pythiogeton	Pythiogeton uniforme	0	0	0	14	0	0	0	0	0	0	0	0	0	0	0	0	0	0	0	0	0	0	0	0	0	0	0	0	0	0	0	0	0	0	0	0	0	0	0	0	0	0
ASV1570	Fungi	'uncultured fungus'	'uncultured fungus'	'uncultured fungus'	'uncultured fungus'	'uncultured fungus'	uncultured fungus	0	0	0	0	0	0	0	0	0	0	0	0	0	31	0	0	0	0	0	0	0	0	0	0	0	0	0	0	0	0	0	0	0	12	11	0	0	0	0	0	0	9
ASV1571	Stramenopila	Heterokontophyta	Oomycetes	Myzocytiopsidales	Myzocytiopsidaceae	Myzocytiopsis	Myzocytiopsis lenticularis	58	0	0	0	0	0	0	0	0	0	0	0	0	0	0	0	0	0	0	0	0	0	0	0	0	0	0	0	0	0	0	0	0	0	0	0	0	0	0	0	0	0
ASV1572			Chrysophyceae	Chromulinales	Chromulinaceae	Spumella	Spumella vulgaris	0	0	0	0	0	0	0	0	0	0	61	0	0	0	0	0	0	0	0	0	0	0	0	0	0	0	0	0	0	0	0	0	0	0	0	0	0	0	0	0	0	0
ASV1573	Viridiplantae	Streptophyta	Magnoliopsida	Gentianales	Apocynaceae	Artia	Artia balansae	0	0	0	12	0	0	0	0	0	0	0	0	0	0	0	0	0	0	0	0	0	63	0	0	0	0	0	0	0	41	0	0	0	0	0	0	0	0	0	0	0	0
ASV1574	Stramenopila	Heterokontophyta	Oomycetes		Lagenaceae	Lagena	Lagena radicicola	0	0	0	0	0	0	116	0	0	0	0	0	0	0	0	0	0	0	0	0	0	0	0	0	0	0	0	0	0	0	0	0	0	0	0	0	0	0	0	0	0	0
ASV1575	Fungi	'uncultured fungus'	'uncultured fungus'	'uncultured fungus'	'uncultured fungus'	'uncultured fungus'	uncultured fungus	0	0	0	0	0	0	0	0	0	0	0	0	0	0	0	0	0	0	0	0	0	0	0	0	0	0	0	0	0	0	0	0	0	0	0	91	0	0	0	0	0	7
ASV1576			Chrysophyceae	Chromulinales	Chromulinaceae	'Spumella-like'	Spumella-like flagellate 1006	0	0	0	0	0	0	0	0	0	0	0	0	0	0	0	0	0	0	0	0	0	0	0	0	0	0	0	0	0	0	0	0	0	0	0	0	0	0	0	0	0	0
ASV1577	Metazoa	Chordata	Actinopteri	Cypriniformes	Cyprinidae	Cyprinus	Cyprinus carpio	0	0	0	0	0	0	0	0	0	0	0	0	0	0	0	0	0	0	0	0	0	0	0	0	0	0	0	0	0	0	0	0	0	0	0	0	0	0	0	0	0	0
ASV1578	Metazoa	Chordata	Mammalia	Rodentia	Chinchillidae	Chinchilla	Chinchilla lanigera	0	0	0	0	0	0	0	0	0	0	0	0	0	0	0	0	0	0	0	0	0	0	0	0	0	0	0	0	0	0	0	0	0	0	0	0	0	0	0	0	0	0
ASV1579	Stramenopila	Heterokontophyta	Oomycetes	Saprolegniales	Saprolegniaceae	Aphanomyces	Aphanomyces stellatus	0	0	0	0	0	0	0	0	0	0	0	0	0	0	0	0	0	0	0	0	0	0	0	0	0	0	0	0	0	0	0	0	0	0	0	0	0	0	0	0	0	0
ASV1580	Stramenopila	Heterokontophyta	Oomycetes	Pythiales	Pythiaceae	Pythium	Pythium sp. FL-2016h	0	0	0	0	0	0	0	0	0	0	0	0	0	0	0	0	0	0	0	0	0	0	0	0	0	0	0	0	0	0	0	0	0	0	0	0	0	0	0	0	0	0
ASV1581			Chrysophyceae	Chromulinales	Chromulinaceae	Spumella	Spumella vulgaris	11	0	0	0	0	0	0	0	8	0	0	0	0	0	0	0	0	0	0	0	0	0	0	0	0	0	0	0	0	0	0	0	0	0	0	0	0	0	0	0	0	0
ASV1582	Fungi	'uncultured fungus'	'uncultured fungus'	'uncultured fungus'	'uncultured fungus'	'uncultured fungus'	uncultured fungus	0	0	0	0	0	0	0	0	0	0	0	0	0	0	0	0	0	0	0	0	0	0	0	0	0	0	0	0	0	0	0	0	24	0	0	66	0	0	0	0	0	0
ASV1583	Stramenopila	Heterokontophyta	Oomycetes	Pythiales	Pythiaceae	Pythium	Pythium periplocum	0	0	0	0	0	0	0	0	0	0	0	0	0	0	11	0	24	0	0	0	0	0	0	0	0	0	0	0	0	0	0	0	0	0	0	0	0	0	0	0	0	0
ASV1584	Fungi	'uncultured fungus'	'uncultured fungus'	'uncultured fungus'	'uncultured fungus'	'uncultured fungus'	uncultured fungus	0	0	0	0	0	0	0	0	0	0	0	0	0	0	0	0	0	0	0	0	0	0	0	0	0	70	0	0	0	0	0	0	0	0	0	0	0	0	0	0	0	0
ASV1585	Stramenopila	Heterokontophyta	Oomycetes	Peronosporales	Peronosporaceae	Hyaloperonospora	Hyaloperonospora nasturtii-aquatici	0	0	0	0	0	0	0	0	0	0	0	0	0	0	0	0	115	0	0	0	0	0	0	0	0	0	0	0	0	0	0	0	0	0	0	0	0	0	0	0	0	0
ASV1586		Cyanobacteria					cyanobacterium endosymbiont of Epithemia turgida	0	0	0	0	0	0	0	0	0	0	0	0	0	0	0	0	0	0	0	0	0	115	0	0	0	0	0	0	0	0	0	0	0	0	0	0	0	0	0	0	0	0
ASV1587			Dinophyceae	Prorocentrales	Prorocentraceae	Prorocentrum	Prorocentrum micans	0	0	0	0	0	0	0	0	0	0	0	0	0	0	0	0	0	0	0	0	0	0	0	0	0	98	17	0	0	0	0	0	0	0	0	0	0	0	0	0	0	0
ASV1588	Stramenopila	Heterokontophyta	Oomycetes	Pythiales	Pythiogetonaceae	Pythiogeton	Pythiogeton uniforme	0	0	0	0	0	0	0	0	0	0	0	0	0	0	0	0	0	0	0	0	0	0	0	0	0	0	0	0	0	0	0	0	0	0	0	114	0	0	0	0	0	0
ASV1589			Chrysophyceae	Chromulinales	Chromulinaceae	'Spumella-like'	Spumella-like flagellate 1006	0	0	0	0	0	0	0	0	0	0	0	0	0	0	0	0	0	0	0	0	0	0	0	0	0	0	0	0	0	0	0	0	0	0	0	0	0	0	0	0	0	0
ASV1590		Bacillariophyta	Bacillariophyceae	Bacillariales	Bacillariaceae	Nitzschia	Nitzschia palea	0	0	0	0	0	0	0	0	0	0	0	0	0	0	0	0	0	0	0	0	0	0	0	0	0	0	0	0	0	0	0	0	0	0	0	0	0	0	0	0	0	0
ASV1591	Fungi	'uncultured fungus'	'uncultured fungus'	'uncultured fungus'	'uncultured fungus'	'uncultured fungus'	uncultured fungus	0	0	0	0	0	0	0	0	0	0	0	0	0	0	0	0	0	0	0	0	0	0	0	0	0	0	0	0	0	0	0	0	0	0	0	0	0	0	0	0	0	0
ASV1592	Stramenopila	Heterokontophyta	Oomycetes	Pythiales	Pythiaceae	Globisporangium	Globisporangium spinosum	0	0	0	0	0	0	0	0	0	0	0	0	0	0	0	0	0	0	0	0	0	0	0	0	0	0	0	0	0	0	0	0	0	0	0	0	0	0	0	0	0	0
ASV1593	Fungi	Ascomycota	Eurotiomycetes	Eurotiales	Aspergillaceae	Aspergillus	Aspergillus flavus	0	74	0	0	0	10	30	0	0	0	0	0	0	0	0	0	0	0	0	0	0	0	0	0	0	0	0	0	0	0	0	0	0	0	0	0	0	0	0	0	0	0
ASV1594		Bacillariophyta	Bacillariophyceae	Naviculales	Naviculaceae	Navicula	Navicula trivialis	0	0	0	0	0	0	0	0	0	114	0	0	0	0	0	0	0	0	0	0	0	0	0	0	0	0	0	0	0	0	0	0	0	0	0	0	0	0	0	0	0	0
ASV1595	Metazoa	Arthropoda	Insecta	Hymenoptera	Apidae	Apis	Apis dorsata	0	0	0	0	0	0	0	0	0	0	0	0	0	0	0	0	0	0	0	0	0	66	48	0	0	0	0	0	0	0	0	0	0	0	0	0	0	0	0	0	0	0
ASV1596			Chrysophyceae	Chromulinales	Chromulinaceae	'Spumella-like'	Spumella-like flagellate 1006	0	0	0	0	0	0	0	0	0	0	0	0	0	0	0	0	0	0	0	0	0	0	0	0	0	0	114	0	0	0	0	0	0	0	0	0	0	0	0	0	0	0
ASV1598	Stramenopila	Heterokontophyta	Oomycetes	Lagenidiales	Lagenidiaceae	Lagenidium	Lagenidium sp. SLG-2014b	0	0	0	0	0	0	0	0	0	0	0	0	0	0	0	0	0	0	0	0	0	0	0	0	0	0	0	0	0	0	0	0	0	0	0	0	0	0	0	0	0	0
ASV1599			Chrysophyceae	Chromulinales	Chromulinaceae	Pedospumella	Pedospumella sp.	0	0	0	0	0	0	0	0	0	0	0	0	0	0	0	0	0	0	0	0	0	0	0	0	0	0	0	0	0	0	0	0	0	0	0	0	0	0	0	0	0	0
ASV1600	Stramenopila	Heterokontophyta	Oomycetes	Pythiales	Pythiaceae	Globisporangium	Globisporangium intermedium	0	0	0	0	0	0	0	0	0	0	0	0	0	0	0	0	0	0	0	0	0	0	0	0	0	0	0	0	0	0	0	0	0	0	0	0	0	0	0	0	0	0
ASV1601	Stramenopila	Heterokontophyta	Oomycetes	Pythiales	Pythiaceae	Pythium	Pythium heterothallicum	0	0	0	0	0	0	0	0	0	0	0	0	0	0	0	0	0	0	0	0	0	0	0	0	0	0	0	113	0	0	0	0	0	0	0	0	0	0	0	0	0	0
ASV1602	Stramenopila	Heterokontophyta	Oomycetes	Peronosporales	Peronosporaceae	Phytophthora	Phytophthora nicotianae	0	0	0	0	0	0	0	0	0	0	0	0	0	0	0	0	0	0	0	0	0	0	0	0	0	0	0	0	0	0	0	0	0	0	0	0	0	0	0	0	0	0
ASV1603	Stramenopila	Heterokontophyta	Oomycetes	Saprolegniales	Saprolegniaceae	Plectospira	Plectospira myriandra	0	0	0	0	0	0	0	0	0	0	0	0	0	0	0	0	0	0	0	0	0	0	0	0	0	0	0	0	0	0	0	0	0	0	0	0	0	0	0	0	0	0
ASV1604	Stramenopila	Heterokontophyta	Oomycetes	Lagenidiales	Lagenidiaceae	Lagenidium	Lagenidium sp. SLG-2014b	0	0	0	0	0	0	0	0	0	0	0	0	0	0	0	0	0	0	0	0	0	0	0	0	0	0	0	0	0	0	0	0	0	0	0	0	0	0	0	0	0	0
ASV1605	Stramenopila	Heterokontophyta	Oomycetes	Pythiales	Pythiaceae	Globisporangium	Globisporangium intermedium	0	0	0	0	0	0	0	0	0	0	0	0	0	0	0	0	0	0	0	0	0	0	0	0	0	0	0	0	0	0	0	0	0	0	0	0	0	0	0	0	0	0
ASV1606			Chrysophyceae	Chromulinales	Chromulinaceae	'Spumella-like'	Spumella-like flagellate 391f	0	0	0	0	0	0	0	0	0	0	0	0	0	0	0	0	0	0	0	0	0	0	0	0	0	0	0	0	0	0	0	0	0	0	0	0	0	0	0	0	0	0
ASV1607		Proteobacteria	Gammaproteobacteria	Pseudomonadales	Pseudomonadaceae	Azotobacter	Azotobacter vinelandii	0	0	0	0	0	0	0	0	0	0	0	0	0	0	0	0	0	0	0	0	0	0	0	0	0	0	0	0	0	0	0	0	0	0	0	0	0	0	0	0	0	0
ASV1608	Metazoa	Chordata	Aves	Passeriformes	Tyrannidae	Empidonax	Empidonax traillii	0	0	0	0	0	0	0	0	0	0	0	0	0	0	0	0	0	0	0	0	0	0	0	0	0	0	0	0	0	0	0	0	0	0	0	0	0	0	0	0	0	0
ASV1609			Chrysophyceae	Chromulinales	Chromulinaceae	'Spumella-like'	Spumella-like flagellate 391f	0	0	0	0	0	0	0	0	0	0	0	0	0	0	0	0	0	0	0	0	0	0	0	0	0	0	0	0	0	0	0	19	0	0	0	0	0	0	0	0	0	0
ASV1610			Chrysophyceae	Chromulinales	Chromulinaceae	Pedospumella	Pedospumella encystans	0	36	0	0	0	0	0	0	0	0	0	0	0	0	0	0	0	0	0	0	0	0	0	0	0	0	0	0	0	0	0	0	0	0	0	0	0	0	0	0	0	0
ASV1611			Chrysophyceae			Segregatospumella	Segregatospumella sp.	0	0	0	0	0	0	0	0	0	0	0	0	0	0	0	0	0	0	0	0	0	0	0	0	0	0	24	0	0	0	0	0	30	0	0	0	12	0	0	0	0	0
ASV1612	Fungi	'uncultured fungus'	'uncultured fungus'	'uncultured fungus'	'uncultured fungus'	'uncultured fungus'	uncultured fungus	0	0	0	0	0	0	0	0	0	0	0	0	0	0	0	0	0	0	0	0	0	0	0	0	0	0	0	0	0	0	0	0	0	0	0	0	0	0	0	0	0	0
ASV1613	Stramenopila	Heterokontophyta	Oomycetes	Saprolegniales	Saprolegniaceae	Achlya	Achlya bisexualis	0	0	0	0	0	0	0	0	0	0	0	0	0	112	0	0	0	0	0	0	0	0	0	0	0	0	0	0	0	0	0	0	0	0	0	0	0	0	0	0	0	0
ASV1614			Chrysophyceae			Segregatospumella	Segregatospumella sp.	0	0	0	0	0	0	0	0	0	0	0	0	0	0	0	0	0	0	0	0	0	0	0	0	0	0	0	0	112	0	0	0	0	0	0	0	0	0	0	0	0	0
ASV1615	Stramenopila	Heterokontophyta	Oomycetes	Pythiales	Pythiaceae	Pythium	Pythium camurandrum	0	0	0	0	0	0	0	0	0	0	0	0	0	0	0	0	0	0	0	0	0	0	0	0	0	0	0	0	0	0	0	112	0	0	0	0	0	0	0	0	0	0
ASV1616	Stramenopila	Heterokontophyta	Oomycetes	Pythiales	Pythiogetonaceae	Pythiogeton	Pythiogeton uniforme	0	0	0	0	0	0	0	0	0	0	0	0	0	0	0	0	0	0	0	0	0	0	0	0	0	0	0	0	0	0	0	0	0	0	0	111	0	0	0	0	0	0
ASV1617			Chrysophyceae	Chromulinales	Chromulinaceae	Spumella	Spumella sp.	0	0	0	0	0	0	0	0	0	0	0	0	0	0	0	0	0	0	0	0	0	0	0	0	0	0	0	0	0	0	0	0	0	0	0	0	0	0	0	0	0	0
ASV1618	Stramenopila	Heterokontophyta	Oomycetes	Pythiales	Pythiaceae	Pythium	Pythium oligandrum	0	0	0	0	0	0	0	0	0	0	0	0	0	0	0	0	0	0	0	0	0	0	0	0	0	0	0	0	0	0	0	0	0	0	0	0	0	0	0	0	0	0
ASV1619		'uncultured eukaryote'	'uncultured eukaryote'	'uncultured eukaryote'	'uncultured eukaryote'	'uncultured eukaryote'	uncultured eukaryote	0	0	0	0	0	0	0	0	0	0	0	0	0	0	0	0	0	0	0	0	0	0	0	0	0	0	0	0	0	0	0	0	0	0	0	0	0	0	0	0	0	0
ASV1620			Choanoflagellata	Craspedida	Salpingoecidae	Salpingoeca	Salpingoeca rosetta	0	0	0	0	0	0	0	0	0	0	0	0	0	0	0	0	0	0	0	0	0	0	0	0	0	0	0	0	0	0	0	0	64	0	0	0	0	0	0	0	3	0
ASV1621	Stramenopila	Heterokontophyta	Oomycetes	Pythiales	Pythiaceae	Pythium	Pythium kandovanense	53	0	0	0	58	0	0	0	0	0	0	0	0	0	0	0	0	0	0	0	0	0	0	0	0	0	0	0	0	0	0	0	0	0	0	0	0	0	0	0	0	0
ASV1622	Stramenopila	Heterokontophyta	Oomycetes	Pythiales	Pythiaceae	Pythium	Pythium polymastum	0	0	0	0	0	0	0	0	0	111	0	0	0	0	0	0	0	0	0	0	0	0	0	0	0	0	0	0	0	0	0	0	0	0	0	0	0	0	0	0	0	0
ASV1623	Stramenopila	Heterokontophyta	Oomycetes	Pythiales	Pythiaceae	Pythium	Pythium camurandrum	0	0	0	0	0	0	0	0	0	0	0	0	0	0	0	0	0	0	0	0	0	0	0	0	0	0	0	0	0	0	0	111	0	0	0	0	0	0	0	0	0	0
ASV1624		'uncultured eukaryote'	'uncultured eukaryote'	'uncultured eukaryote'	'uncultured eukaryote'	'uncultured eukaryote'	uncultured eukaryote	0	0	0	0	0	0	0	0	0	0	0	0	0	0	0	0	0	0	0	0	0	0	0	0	0	0	0	0	0	0	0	0	0	0	0	0	0	0	0	0	0	0
ASV1625	Stramenopila	Heterokontophyta	Oomycetes	Pythiales	Pythiaceae	Globisporangium	Globisporangium intermedium	0	0	0	0	0	0	0	0	0	0	0	0	0	0	0	0	0	0	0	0	0	0	0	0	0	0	0	0	0	0	0	0	0	0	0	0	0	0	0	0	0	0
ASV1626		Bacillariophyta	Bacillariophyceae	Naviculales	Naviculaceae	Navicula	Navicula trivialis	0	0	0	0	0	0	0	0	0	110	0	0	0	0	0	0	0	0	0	0	0	0	0	0	0	0	0	0	0	0	0	0	0	0	0	0	0	0	0	0	0	0
ASV1627								0	0	0	0	0	0	0	0	0	0	0	0	0	0	0	0	0	0	0	0	0	0	0	0	0	0	0	0	0	0	0	0	110	0	0	0	0	0	0	0	0	0
ASV1628		Bacteroidetes	Flavobacteriia	Flavobacteriales	Flavobacteriaceae	Capnocytophaga	Capnocytophaga stomatis	0	0	0	0	0	0	0	0	0	0	0	0	0	0	0	0	0	0	0	0	0	0	0	0	0	0	0	0	0	0	0	0	0	0	0	0	0	0	0	0	0	0
ASV1629	Metazoa	Chordata	Mammalia	Primates	Hominidae	Homo	Homo sapiens	0	0	0	0	0	0	0	0	0	0	0	0	0	0	0	0	0	0	0	0	0	0	0	0	0	0	0	0	0	0	0	0	0	0	0	0	0	0	0	0	0	0
ASV1630	Fungi	'uncultured fungus'	'uncultured fungus'	'uncultured fungus'	'uncultured fungus'	'uncultured fungus'	uncultured fungus	0	0	0	0	0	0	0	0	0	0	0	0	0	0	0	0	0	0	0	0	0	0	0	0	0	0	0	0	0	0	0	0	0	0	0	0	0	0	0	0	0	0
ASV1631			Dinophyceae	Prorocentrales	Prorocentraceae	Prorocentrum	Prorocentrum micans	0	0	0	0	0	0	0	0	0	0	0	0	0	0	0	0	0	0	0	0	0	0	0	0	0	0	0	0	0	0	0	0	0	0	0	0	0	0	0	0	0	0
ASV1632	Metazoa	Chordata	Actinopteri	Salmoniformes	Salmonidae	Salmo	Salmo trutta	0	0	0	0	0	0	0	0	0	0	0	0	0	0	0	0	0	0	0	0	0	0	0	0	0	0	0	0	0	0	0	0	0	0	0	0	0	0	0	0	0	0
ASV1633	Stramenopila	Heterokontophyta	Oomycetes	Peronosporales	Peronosporaceae	Phytophthora	Phytophthora undulata	0	0	0	0	0	0	0	0	0	0	0	0	0	0	0	0	0	0	0	0	0	0	0	0	0	0	0	0	0	0	0	0	0	0	0	0	0	0	0	0	0	0
ASV1634		Tenericutes	Mollicutes	Entomoplasmatales	Entomoplasmataceae	Mesoplasma	Mesoplasma tabanidae	0	0	0	0	0	0	0	0	0	0	0	0	0	0	0	0	0	0	0	0	0	0	0	0	0	0	0	0	0	0	0	0	0	0	0	0	0	0	0	0	0	0
ASV1635	Stramenopila	Heterokontophyta	Oomycetes	Pythiales	Pythiaceae	Pythium	Pythium oligandrum	0	0	0	0	0	0	0	78	0	0	0	0	0	0	0	0	0	0	0	0	0	0	0	0	0	0	0	0	0	0	0	0	0	0	0	0	0	0	0	0	0	0
ASV1636		Bacillariophyta	Bacillariophyceae	Bacillariales	Bacillariaceae	Pseudo-nitzschia	Pseudo-nitzschia lineola	0	0	0	0	0	0	0	0	0	0	0	0	0	0	0	0	0	0	0	0	0	0	109	0	0	0	0	0	0	0	0	0	0	0	0	0	0	0	0	0	0	0
ASV1637	Stramenopila	Heterokontophyta	Oomycetes	Pythiales	Pythiaceae	Pythium	Pythium nagaii	0	0	0	0	0	0	0	0	0	0	0	0	0	0	0	0	0	0	0	0	0	0	0	0	0	0	0	0	0	0	0	0	0	0	0	0	108	0	0	0	0	0
ASV1638	Stramenopila	Heterokontophyta	Oomycetes	Pythiales	Pythiaceae	Pythium	Pythium myriotylum	0	0	0	0	0	0	0	0	0	0	0	0	0	0	0	0	0	0	0	0	0	0	0	0	0	0	0	0	0	0	0	0	0	0	0	0	0	0	0	0	0	0
ASV1639	Stramenopila	Heterokontophyta	Oomycetes	Pythiales	Pythiaceae	Pythium	Pythium sp.	0	0	0	0	0	0	0	0	0	0	0	0	0	0	0	0	0	0	0	0	0	0	0	0	0	0	0	0	0	0	0	0	0	0	0	0	0	0	0	0	0	0
ASV1640			Chrysophyceae	Chromulinales	Chromulinaceae	Pedospumella	Pedospumella sp. JBM19	0	0	0	0	0	0	0	0	0	0	0	0	0	0	0	0	0	0	0	0	0	0	0	0	0	0	0	0	0	0	0	0	0	0	0	0	0	0	0	0	0	0
ASV1641	Stramenopila	Heterokontophyta	Oomycetes	Pythiales	Pythiaceae	Pythium	Pythium camurandrum	0	0	0	0	0	0	0	0	0	0	0	0	0	0	0	0	0	0	0	0	0	0	0	0	0	0	0	0	0	0	0	0	0	0	0	0	0	0	0	0	0	0
ASV1642		'uncultured eukaryote'	'uncultured eukaryote'	'uncultured eukaryote'	'uncultured eukaryote'	'uncultured eukaryote'	uncultured eukaryote	0	0	0	0	0	0	0	0	0	0	0	0	0	0	0	0	0	0	0	0	0	0	0	0	0	0	0	0	0	0	0	0	0	0	0	0	0	0	0	0	0	0
ASV1643			Chrysophyceae			'Spumella-like'	Spumella-like flagellate JBC/S24	0	0	0	0	0	0	0	0	0	108	0	0	0	0	0	0	0	0	0	0	0	0	0	0	0	0	0	0	0	0	0	0	0	0	0	0	0	0	0	0	0	0
ASV1644	Metazoa	Chordata	Actinopteri	Perciformes	Bovichtidae	Cottoperca	Cottoperca gobio	0	0	0	0	0	0	0	0	0	0	0	0	0	0	0	0	0	0	0	0	0	0	0	0	0	0	0	0	108	0	0	0	0	0	0	0	0	0	0	0	0	0
ASV1645	Metazoa	Chordata	Actinopteri	Anabantiformes	Anabantidae	Anabas	Anabas testudineus	0	0	0	0	0	0	0	0	0	0	0	0	0	0	0	0	0	0	0	0	0	0	0	0	0	0	0	0	0	0	0	0	0	0	0	0	0	0	0	0	0	0
ASV1646		Fusobacteria	Fusobacteriia	Fusobacteriales	Leptotrichiaceae	Leptotrichia	Leptotrichia sp. oral taxon 498	0	0	0	6	0	0	0	0	0	0	0	0	0	0	0	0	0	0	0	0	0	0	0	0	0	0	0	0	0	0	0	0	0	0	0	27	0	0	0	0	0	0
ASV1647			Chrysophyceae	Chromulinales	Chromulinaceae	'Spumella-like'	Spumella-like flagellate 391f	0	0	0	0	0	0	0	0	0	0	0	0	0	0	0	0	0	0	0	0	0	0	0	0	0	0	0	0	0	0	0	0	21	0	0	0	0	0	0	65	0	0
ASV1648	Fungi	'uncultured fungus'	'uncultured fungus'	'uncultured fungus'	'uncultured fungus'	'uncultured fungus'	uncultured fungus	0	0	27	0	0	0	0	0	0	0	0	0	0	0	0	0	0	0	0	0	0	0	0	0	0	0	0	0	0	0	0	0	0	0	0	0	80	0	0	0	0	0
ASV1649			Chrysophyceae	Chromulinales	Chromulinaceae	Spumella	Spumella sp.	0	0	0	0	0	39	0	0	0	0	0	0	0	0	0	0	0	0	0	0	0	0	0	0	0	0	0	0	0	0	0	0	0	0	0	0	0	0	0	0	0	0
ASV1650		Bacillariophyta	Bacillariophyceae	Bacillariales	Bacillariaceae	Pseudo-nitzschia	Pseudo-nitzschia lineola	0	0	0	54	0	0	0	0	0	0	0	0	0	0	0	53	0	0	0	0	0	0	0	0	0	0	0	0	0	0	0	0	0	0	0	0	0	0	0	0	0	0
ASV1651	Stramenopila	Heterokontophyta	Oomycetes	Saprolegniales	Saprolegniaceae	Achlya	Achlya spiralis	0	0	0	0	0	0	54	0	0	0	0	0	0	0	0	0	0	0	0	0	53	0	0	0	0	0	0	0	0	0	0	0	0	0	0	0	0	0	0	0	0	0
ASV1652			Chrysophyceae	Chromulinales	Chromulinaceae	Spumella	Spumella sp.	0	0	0	0	0	0	0	0	0	0	0	0	0	0	0	0	0	0	0	0	0	0	0	0	0	0	0	0	0	0	0	0	0	0	106	0	0	0	0	0	0	0
ASV1653	Stramenopila	Heterokontophyta	Oomycetes	Peronosporales	Peronosporaceae	Hyaloperonospora	Hyaloperonospora barbareae	0	0	0	0	0	0	0	0	0	0	0	0	0	0	0	0	0	0	0	0	0	0	0	0	0	0	0	0	0	0	0	0	0	0	0	0	0	0	0	35	0	0
ASV1654	Stramenopila	Heterokontophyta	Oomycetes	Pythiales	Pythiogetonaceae	Pythiogeton	Pythiogeton uniforme	0	0	0	0	0	0	0	0	0	0	0	0	0	0	0	0	0	0	0	0	0	0	0	0	0	0	0	0	0	0	0	0	0	0	0	0	0	0	0	0	0	0
ASV1655	Fungi	'uncultured fungus'	'uncultured fungus'	'uncultured fungus'	'uncultured fungus'	'uncultured fungus'	uncultured fungus	0	0	0	0	0	0	0	0	0	0	0	0	0	0	0	0	0	0	0	0	0	0	0	0	0	0	0	0	0	0	0	0	0	0	0	0	0	0	0	0	0	0
ASV1656	Metazoa	Chordata	Actinopteri	Atheriniformes	Phallostethidae	Neostethus	Neostethus bicornis	0	0	0	0	0	0	0	0	0	0	0	0	0	0	0	0	0	0	0	0	0	0	0	0	0	0	0	0	0	0	0	0	0	0	0	0	0	0	0	0	0	0
ASV1657	Stramenopila	Heterokontophyta	Oomycetes	Pythiales	Pythiaceae	Pythium	Pythium heterothallicum	0	0	0	0	0	0	0	0	0	0	0	0	0	0	0	0	0	0	0	0	0	0	0	0	0	0	0	0	0	0	0	0	0	0	0	0	0	0	0	0	0	0
ASV1658			Chrysophyceae	Chromulinales	Chromulinaceae	Spumella	Spumella sp.	0	0	0	0	0	0	0	0	0	0	0	0	0	0	0	0	0	0	0	0	0	0	0	0	0	0	0	0	0	0	0	0	0	0	0	0	0	0	0	0	0	0
ASV1659	Stramenopila	Heterokontophyta	Oomycetes	Saprolegniales	Saprolegniaceae	Achlya	Achlya bisexualis	0	0	0	0	0	0	0	0	0	0	0	0	0	106	0	0	0	0	0	0	0	0	0	0	0	0	0	0	0	0	0	0	0	0	0	0	0	0	0	0	0	0
ASV1660	Metazoa	Chordata	Mammalia	Rodentia	Muridae	Mus	Mus musculus	0	0	0	0	0	0	0	0	0	0	0	0	0	0	0	0	0	0	0	0	0	106	0	0	0	0	0	0	0	0	0	0	0	0	0	0	0	0	0	0	0	0
ASV1661	Stramenopila	Heterokontophyta	Oomycetes	Pythiales	Pythiaceae	Pythium	Pythium aff. monospermum	0	0	0	0	0	0	0	0	0	0	0	0	0	0	0	0	0	0	0	0	0	0	0	0	106	0	0	0	0	0	0	0	0	0	0	0	0	0	0	0	0	0
ASV1662		'uncultured eukaryote'	'uncultured eukaryote'	'uncultured eukaryote'	'uncultured eukaryote'	'uncultured eukaryote'	uncultured eukaryote	0	0	0	0	0	0	0	0	0	0	0	0	0	0	0	0	0	0	0	0	0	0	0	0	0	0	0	0	0	0	0	0	0	14	0	0	0	0	0	0	0	0
ASV1663	Stramenopila	Heterokontophyta	Oomycetes	Pythiales	Pythiogetonaceae	Pythiogeton	Pythiogeton uniforme	0	0	0	0	0	0	0	0	0	0	0	0	0	0	0	0	0	0	0	0	0	0	0	0	0	0	0	0	0	0	0	0	0	0	0	105	0	0	0	0	0	0
ASV1664			Chrysophyceae	Chromulinales	Chromulinaceae	'Spumella-like'	Spumella-like flagellate 1031	0	0	0	0	0	0	0	0	0	0	0	0	0	0	0	0	0	0	0	0	0	0	0	0	0	0	0	0	0	0	0	0	0	0	0	0	0	0	0	0	0	0
ASV1665							Human ORFeome Gateway entry vector	0	0	0	0	0	0	0	0	0	0	0	0	0	0	0	0	0	0	0	0	0	0	0	0	0	0	0	0	0	0	0	0	0	0	0	0	0	0	0	0	0	0
ASV1666	Fungi	'uncultured fungus'	'uncultured fungus'	'uncultured fungus'	'uncultured fungus'	'uncultured fungus'	uncultured fungus	0	0	0	0	0	0	0	0	0	0	0	0	0	0	0	0	0	0	0	0	0	0	0	0	0	0	0	0	0	0	0	0	0	0	0	0	0	0	0	0	0	0
ASV1667	Fungi	'uncultured fungus'	'uncultured fungus'	'uncultured fungus'	'uncultured fungus'	'uncultured fungus'	uncultured fungus	0	0	0	0	0	0	0	0	0	0	0	0	0	0	0	0	0	0	0	0	0	0	0	0	0	0	0	0	0	0	0	0	0	0	0	0	0	0	0	0	0	0
ASV1668	Metazoa	Arthropoda	Insecta	Hymenoptera	Braconidae	Microplitis	Microplitis demolitor	0	0	0	0	0	0	0	0	0	0	0	0	0	0	0	0	0	0	0	0	0	0	0	0	0	0	0	0	0	0	0	21	0	0	0	11	0	0	0	0	0	0
ASV1669		Bacillariophyta	Bacillariophyceae	Surirellales	Surirellaceae	Surirella	Surirella sp. CCAP 1071/2	0	0	0	0	0	0	0	0	0	105	0	0	0	0	0	0	0	0	0	0	0	0	0	0	0	0	0	0	0	0	0	0	0	0	0	0	0	0	0	0	0	0
ASV1670			Chrysophyceae	Chromulinales	Chromulinaceae	'Spumella-like'	Spumella-like flagellate 194f	0	0	0	0	0	0	0	0	0	0	0	0	0	0	0	0	0	0	0	0	0	0	0	0	0	0	0	0	0	0	0	0	0	0	0	0	0	0	0	0	0	0
ASV1671	Metazoa	Chordata	Mammalia	Rodentia	Chinchillidae	Chinchilla	Chinchilla lanigera	0	0	0	0	0	0	0	0	0	0	0	0	0	0	0	0	0	0	0	0	0	0	0	0	0	0	0	0	0	0	0	0	0	0	0	0	0	0	0	0	0	0
ASV1672		Apicomplexa	Aconoidasida	Haemosporida	Plasmodiidae	Plasmodium	Plasmodium sp. gorilla clade G2	0	0	0	0	0	0	0	0	0	0	0	0	0	0	0	0	0	0	0	0	0	0	0	0	0	0	0	0	0	0	0	0	0	0	0	0	0	0	0	0	0	0
ASV1673		'uncultured eukaryote'	'uncultured eukaryote'	'uncultured eukaryote'	'uncultured eukaryote'	'uncultured eukaryote'	uncultured eukaryote	0	0	0	0	0	0	0	0	0	0	0	0	0	0	0	0	0	0	0	0	0	0	0	0	0	0	0	0	0	0	0	0	0	0	0	0	0	0	0	0	0	0
ASV1674			Chrysophyceae			Segregatospumella	Segregatospumella sp.	0	0	0	0	0	0	0	0	0	0	0	0	0	0	0	0	0	0	0	0	0	0	0	0	0	0	0	0	24	0	0	0	0	0	0	0	0	0	0	0	0	0
ASV1675		Bacillariophyta	Bacillariophyceae	Naviculales	Naviculaceae	Navicula	Navicula trivialis	0	0	0	0	0	0	0	0	0	104	0	0	0	0	0	0	0	0	0	0	0	0	0	0	0	0	0	0	0	0	0	0	0	0	0	0	0	0	0	0	0	0
ASV1676	Stramenopila	Heterokontophyta	Oomycetes			Haptoglossa	Haptoglossa zoospora	0	0	0	0	0	0	0	0	0	0	0	0	0	0	0	0	0	0	0	0	0	0	104	0	0	0	0	0	0	0	0	0	0	0	0	0	0	0	0	0	0	0
ASV1677	Stramenopila	Heterokontophyta	Oomycetes	Pythiales	Pythiaceae	Globisporangium	Globisporangium intermedium	0	0	0	0	0	0	0	0	0	0	0	0	0	0	0	0	0	0	0	0	0	0	0	0	0	0	0	0	0	0	0	0	104	0	0	0	0	0	0	0	0	0
ASV1678			Chrysophyceae	Chromulinales	Chromulinaceae	Pedospumella	Pedospumella sp. JBM19	0	0	0	0	0	0	0	0	0	0	0	0	0	0	0	0	0	0	0	0	0	0	0	0	0	0	0	0	0	0	0	0	0	0	0	0	0	0	0	0	0	0
ASV1679			Chrysophyceae			Segregatospumella	Segregatospumella sp.	0	0	0	0	0	0	0	0	0	0	0	0	0	0	0	0	0	0	0	0	0	0	0	0	0	0	0	0	0	0	0	0	0	0	0	0	0	0	0	0	0	0
ASV1680			Chrysophyceae			'Spumella-like'	Spumella-like flagellate JBC/S24	0	0	0	0	0	0	0	0	0	0	0	0	0	0	0	0	0	0	0	0	0	0	0	0	0	0	0	0	0	0	0	0	0	0	0	0	0	0	0	0	0	0
ASV1681	Metazoa	Nematoda	Chromadorea	Rhabditida	Strongyloididae	Parastrongyloides	Parastrongyloides trichosuri	0	0	0	0	0	0	0	0	0	0	0	0	0	0	0	0	0	0	0	0	0	0	0	0	0	0	0	0	0	0	0	0	0	0	0	0	0	0	0	0	0	0
ASV1682	Metazoa	Chordata	Actinopteri		Ambassidae	Parambassis	Parambassis ranga	0	0	0	0	0	0	0	0	0	0	0	0	0	0	0	0	0	0	0	0	0	0	0	0	0	0	0	0	0	0	0	0	0	0	0	0	0	0	0	0	0	0
ASV1683	Fungi	'uncultured fungus'	'uncultured fungus'	'uncultured fungus'	'uncultured fungus'	'uncultured fungus'	uncultured fungus	0	0	0	0	0	0	0	0	0	0	0	0	0	0	0	0	0	0	0	0	0	0	0	0	0	0	0	0	0	0	0	0	0	0	0	0	0	0	0	0	0	0
ASV1684			Chrysophyceae	Chromulinales	Chromulinaceae	'Spumella-like'	Spumella-like flagellate 194f	0	0	0	0	0	0	0	0	0	0	0	0	0	0	0	0	0	0	0	0	0	0	0	0	0	0	0	0	0	0	0	0	0	0	0	0	0	0	0	0	0	0
ASV1685	Metazoa	Chordata	Mammalia	Rodentia	Muridae	Mus	Mus musculus	0	0	0	0	0	0	0	0	0	0	0	0	0	0	0	0	0	0	0	0	0	0	0	0	0	0	0	0	0	0	0	0	0	0	0	0	0	0	0	0	0	0
ASV1686		Apicomplexa	Aconoidasida	Haemosporida	Plasmodiidae	Plasmodium	Plasmodium reichenowi	0	0	0	0	0	0	0	0	0	0	0	0	0	0	0	0	0	0	0	0	0	0	0	0	0	0	0	0	0	0	0	0	0	0	0	0	0	0	0	0	0	0
ASV1687	Stramenopila	Heterokontophyta	Oomycetes	Pythiales	Pythiaceae	Pythium	Pythium sp. M-2017a	0	0	0	0	0	0	0	0	0	0	0	0	0	0	0	0	0	0	0	0	0	0	0	0	0	0	0	0	0	0	0	0	0	0	0	0	0	0	0	0	0	0
ASV1688	Metazoa	Arthropoda	Insecta	Hemiptera	Aleyrodidae	Bemisia	Bemisia tabaci	0	0	0	0	0	0	0	0	0	0	0	0	7	0	0	0	0	0	0	0	0	0	0	0	0	0	0	0	0	0	0	0	0	34	0	0	0	0	0	0	0	0
ASV1689	Stramenopila	Heterokontophyta	Oomycetes	Pythiales	Pythiaceae	Pythium	Pythium anandrum	0	0	0	0	0	0	0	0	0	0	5	0	0	7	0	0	0	0	0	0	0	0	0	0	0	0	0	0	0	0	0	0	0	0	0	0	0	0	0	0	22	0
ASV1690	Stramenopila	Heterokontophyta	Oomycetes	Pythiales	Pythiogetonaceae	Pythiogeton	Pythiogeton uniforme	0	0	0	13	0	0	0	0	0	0	0	0	0	0	0	0	0	0	0	0	0	0	0	0	0	0	0	0	0	0	0	0	0	0	0	30	0	0	0	0	0	0
ASV1691	Fungi	'uncultured fungus'	'uncultured fungus'	'uncultured fungus'	'uncultured fungus'	'uncultured fungus'	uncultured fungus	0	0	0	0	0	0	0	0	0	0	80	0	0	0	0	0	0	0	0	0	0	0	0	0	0	0	0	0	0	0	0	0	0	0	0	0	13	0	0	0	0	0
ASV1692	Stramenopila	Heterokontophyta	Oomycetes	Lagenidiales	Lagenidiaceae	Lagenidium	Lagenidium sp. SLG-2014b	0	103	0	0	0	0	0	0	0	0	0	0	0	0	0	0	0	0	0	0	0	0	0	0	0	0	0	0	0	0	0	0	0	0	0	0	0	0	0	0	0	0
ASV1693		Apicomplexa	Aconoidasida	Haemosporida	Plasmodiidae	Plasmodium	Plasmodium reichenowi	0	0	103	0	0	0	0	0	0	0	0	0	0	0	0	0	0	0	0	0	0	0	0	0	0	0	0	0	0	0	0	0	0	0	0	0	0	0	0	0	0	0
ASV1694	Stramenopila	Heterokontophyta	Oomycetes	Pythiales	Pythiaceae	Pythium	Pythium heterothallicum	0	0	0	0	0	30	0	0	0	0	0	0	0	0	0	73	0	0	0	0	0	0	0	0	0	0	0	0	0	0	0	0	0	0	0	0	0	0	0	0	0	0
ASV1695	Viridiplantae	Streptophyta	Magnoliopsida	Gentianales	Apocynaceae	Prestonia	Prestonia annularis	0	0	0	0	0	0	0	0	0	0	0	0	0	0	0	0	0	0	0	0	0	91	12	0	0	0	0	0	0	0	0	0	0	0	0	0	0	0	0	0	0	0
ASV1696	Fungi	'uncultured fungus'	'uncultured fungus'	'uncultured fungus'	'uncultured fungus'	'uncultured fungus'	uncultured fungus	0	0	0	0	0	0	0	0	0	0	0	0	0	0	0	0	0	0	0	0	0	0	0	0	0	0	103	0	0	0	0	0	0	0	0	0	0	0	0	0	0	0
ASV1697	Metazoa	Arthropoda	Insecta	Diptera	Glossinidae	Glossina	Glossina morsitans	0	0	0	0	0	0	0	0	0	0	0	0	0	0	0	0	0	0	0	0	0	0	0	0	0	0	0	0	0	0	0	0	0	0	0	0	0	0	0	0	0	0
ASV1698	Fungi	'uncultured fungus'	'uncultured fungus'	'uncultured fungus'	'uncultured fungus'	'uncultured fungus'	uncultured fungus	0	0	0	0	0	0	0	0	0	0	0	0	0	0	0	0	0	0	0	0	0	0	0	0	0	0	0	0	0	0	0	0	0	0	0	0	0	0	0	0	0	0
ASV1699	Metazoa	Arthropoda	Hexanauplia	Siphonostomatoida	Caligidae	Caligus	Caligus rogercresseyi	0	0	0	0	0	0	0	0	0	0	0	0	0	0	0	0	0	0	0	0	0	0	0	0	0	0	0	0	0	0	0	0	0	0	0	0	0	0	0	0	0	0
ASV1700	Stramenopila	Heterokontophyta	Oomycetes	Pythiales	Pythiaceae	Pythium	Pythium apiculatum	0	0	0	0	0	0	0	0	0	0	0	0	0	0	0	0	0	0	0	0	0	0	0	0	0	0	0	0	0	0	0	0	0	0	0	0	0	0	0	0	0	0
ASV1701	Stramenopila	Heterokontophyta	Oomycetes	Pythiales	Pythiaceae	Pythium	Pythium sp. FL-2016f	0	0	0	0	0	0	0	0	0	0	0	0	0	0	0	0	0	0	0	0	0	0	0	0	0	0	0	0	0	0	0	0	0	0	0	0	0	0	0	0	0	0
ASV1702			Chrysophyceae	Chromulinales	Chromulinaceae	'Spumella-like'	Spumella-like flagellate Got220	0	0	0	0	0	0	0	0	0	0	0	0	0	0	0	0	0	0	0	0	0	0	0	0	0	0	0	0	0	0	0	0	0	0	0	0	0	0	0	0	0	0
ASV1703	Metazoa	Chordata	Mammalia	Rodentia	Bathyergidae	Heterocephalus	Heterocephalus glaber	0	0	28	0	0	0	0	0	0	0	0	0	0	0	0	74	0	0	0	0	0	0	0	0	0	0	0	0	0	0	0	0	0	0	0	0	0	0	0	0	0	0
ASV1704		'uncultured eukaryote'	'uncultured eukaryote'	'uncultured eukaryote'	'uncultured eukaryote'	'uncultured eukaryote'	uncultured eukaryote	0	0	0	0	0	0	0	102	0	0	0	0	0	0	0	0	0	0	0	0	0	0	0	0	0	0	0	0	0	0	0	0	0	0	0	0	0	0	0	0	0	0
ASV1705			Chrysophyceae			Segregatospumella	Segregatospumella sp.	0	0	0	0	0	0	0	0	0	102	0	0	0	0	0	0	0	0	0	0	0	0	0	0	0	0	0	0	0	0	0	0	0	0	0	0	0	0	0	0	0	0
ASV1706		'uncultured eukaryote'	'uncultured eukaryote'	'uncultured eukaryote'	'uncultured eukaryote'	'uncultured eukaryote'	uncultured eukaryote	0	0	0	0	0	0	0	0	0	0	0	0	0	102	0	0	0	0	0	0	0	0	0	0	0	0	0	0	0	0	0	0	0	0	0	0	0	0	0	0	0	0
ASV1707	Metazoa	Chordata	Actinopteri	Cypriniformes	Cyprinidae	Cyprinus	Cyprinus carpio	0	0	0	0	0	0	0	0	0	0	0	0	0	0	0	0	0	0	0	0	0	0	0	0	0	0	0	0	0	0	0	0	0	0	0	0	0	0	0	101	0	0
ASV1708			Chrysophyceae	Chromulinales	Chromulinaceae	'Spumella-like'	Spumella-like flagellate 391f	0	0	0	0	0	0	0	0	0	0	0	0	0	0	0	0	0	0	0	0	0	0	0	0	0	0	0	0	0	0	0	0	0	0	0	0	0	0	0	0	0	6
ASV1709	Fungi	'uncultured fungus'	'uncultured fungus'	'uncultured fungus'	'uncultured fungus'	'uncultured fungus'	uncultured fungus	0	0	0	0	0	0	0	0	0	0	0	0	0	0	0	0	0	0	0	0	0	0	0	0	0	0	0	0	0	0	0	0	0	0	0	0	0	0	0	0	0	0
ASV1710	Viridiplantae	Streptophyta	Magnoliopsida	Brassicales	Brassicaceae	Brassica	Brassica oleracea	0	0	0	0	0	0	0	0	0	0	0	0	0	0	0	0	0	0	0	0	0	0	0	0	0	0	0	0	0	0	0	0	0	0	0	0	0	0	0	0	0	0
ASV1711	Fungi	'uncultured fungus'	'uncultured fungus'	'uncultured fungus'	'uncultured fungus'	'uncultured fungus'	uncultured fungus	0	0	0	0	0	0	0	0	0	0	0	0	0	0	0	0	0	0	0	0	0	0	0	0	0	0	0	0	0	0	0	0	0	0	0	0	0	0	0	0	0	0
ASV1712	Stramenopila	Heterokontophyta	Oomycetes	Pythiales	Pythiogetonaceae	Pythiogeton	Pythiogeton uniforme	0	0	0	0	0	0	0	0	0	0	0	0	0	0	0	0	0	0	0	0	0	0	0	0	0	0	0	0	0	0	0	0	0	0	0	0	0	0	0	0	0	0
ASV1713		Ciliophora	Oligohymenophorea	Hymenostomatida	Tetrahymenidae	Tetrahymena	Tetrahymena thermophila	0	0	0	0	0	0	0	0	0	0	0	0	0	0	0	0	0	0	0	0	0	0	0	0	0	0	0	0	0	0	0	0	0	0	0	0	0	0	0	0	0	0
ASV1714	Fungi	'uncultured fungus'	'uncultured fungus'	'uncultured fungus'	'uncultured fungus'	'uncultured fungus'	uncultured fungus	0	0	0	0	0	0	0	0	0	0	0	0	0	0	0	0	0	0	0	0	0	0	0	0	0	0	0	0	0	0	0	0	0	0	0	0	0	0	0	0	0	0
ASV1715	Metazoa	Chordata	Actinopteri	Beloniformes	Adrianichthyidae	Oryzias	Oryzias latipes	0	0	0	0	0	0	0	0	0	0	0	0	0	0	0	0	0	0	0	0	0	0	0	0	0	0	0	0	0	0	0	0	0	0	0	0	0	0	0	0	0	0
ASV1716		Bacillariophyta	Bacillariophyceae	Naviculales	Naviculaceae	Navicula	Navicula trivialis	0	0	0	0	0	0	0	0	0	0	0	0	0	0	0	0	0	0	0	0	0	0	0	0	0	0	0	0	0	0	0	0	0	0	0	0	0	0	0	0	0	0
ASV1717	Metazoa	Nematoda	Chromadorea	Rhabditida	Strongyloididae	Strongyloides	Strongyloides stercoralis	0	0	0	0	0	0	0	0	0	0	0	0	0	0	0	0	0	0	0	0	0	0	0	0	0	0	0	0	0	0	0	0	0	0	0	0	0	0	0	0	0	0
ASV1718		Evosea	Eumycetozoa	Dictyosteliales	Dictyosteliaceae	Dictyostelium	Dictyostelium discoideum	0	0	0	0	0	0	0	0	0	0	0	0	0	0	0	0	0	0	0	0	0	0	0	0	0	0	0	0	0	0	0	0	0	0	0	0	0	0	0	0	0	0
ASV1719	Metazoa	Chordata	Mammalia	Rodentia	Muridae	Rattus	Rattus norvegicus	4	0	0	0	0	0	0	0	0	0	0	0	0	0	0	0	0	0	0	0	0	0	0	0	0	0	0	0	0	0	0	0	0	0	0	0	97	0	0	0	0	0
ASV1720	Stramenopila	Heterokontophyta	Oomycetes			Haptoglossa	Haptoglossa zoospora	0	0	0	0	0	0	0	0	0	0	0	0	0	0	0	0	0	0	0	0	0	0	0	0	0	0	0	0	0	0	0	0	0	0	0	0	100	0	0	0	0	0
ASV1721			Synurophyceae	Ochromonadales	Ochromonadaceae	Poterioochromonas	Poterioochromonas stipitata	0	0	0	0	0	0	0	0	0	0	0	0	0	0	0	0	0	0	0	0	0	0	0	0	0	0	0	0	0	0	0	0	0	0	0	0	88	0	0	0	0	0
ASV1722	Stramenopila	Heterokontophyta	Oomycetes	Peronosporales	Peronosporaceae	Phytophthora	Phytophthora infestans	0	0	0	0	0	0	0	0	0	0	0	0	0	0	0	0	0	0	0	0	0	0	0	0	0	0	0	0	0	0	0	0	0	0	0	0	0	0	0	0	0	0
ASV1723	Metazoa	Chordata	Actinopteri	Atheriniformes	Phallostethidae	Neostethus	Neostethus bicornis	0	0	0	0	0	0	0	0	0	0	0	0	0	0	0	0	0	0	0	0	0	0	0	0	0	0	0	0	0	0	0	0	0	0	0	0	0	0	0	0	0	0
ASV1724	Fungi	'uncultured fungus'	'uncultured fungus'	'uncultured fungus'	'uncultured fungus'	'uncultured fungus'	uncultured fungus	0	0	0	0	0	0	0	0	0	0	0	0	0	0	0	0	0	0	0	0	0	0	0	0	0	0	0	0	0	0	0	0	0	0	0	0	0	0	0	0	0	0
ASV1725	Viridiplantae	Streptophyta	Magnoliopsida	Malvales	Malvaceae	Gossypium	Gossypium hirsutum	0	0	0	0	0	0	0	0	0	0	0	0	0	0	0	0	0	0	0	0	0	0	0	0	0	0	0	0	0	0	0	0	0	0	0	0	0	0	0	0	0	0
ASV1726			Chrysophyceae	Chromulinales	Chromulinaceae	Spumella	Spumella sp.	0	0	0	0	4	0	0	0	0	0	0	0	0	0	0	0	0	0	0	0	0	0	0	0	0	0	23	0	0	0	0	0	0	0	0	0	0	0	0	0	0	0
ASV1727	Fungi	'uncultured fungus'	'uncultured fungus'	'uncultured fungus'	'uncultured fungus'	'uncultured fungus'	uncultured fungus	0	0	0	0	0	0	0	0	0	0	0	0	0	0	0	0	0	0	0	0	0	0	0	0	0	0	0	0	27	0	0	0	0	0	0	0	0	0	0	0	0	0
ASV1728			Chrysophyceae	Chromulinales	Chromulinaceae	'Spumella-like'	Spumella-like flagellate 391f	0	0	0	0	0	0	0	0	0	0	100	0	0	0	0	0	0	0	0	0	0	0	0	0	0	0	0	0	0	0	0	0	0	0	0	0	0	0	0	0	0	0
ASV1729	Stramenopila	Heterokontophyta	Oomycetes	Pythiales	Pythiaceae	Pythium	Pythium sp. C73	0	0	0	0	0	0	0	0	0	0	0	0	0	0	0	100	0	0	0	0	0	0	0	0	0	0	0	0	0	0	0	0	0	0	0	0	0	0	0	0	0	0
ASV1730		'uncultured eukaryote'	'uncultured eukaryote'	'uncultured eukaryote'	'uncultured eukaryote'	'uncultured eukaryote'	uncultured eukaryote	0	0	0	0	0	0	0	0	0	0	0	0	0	0	0	0	0	0	0	0	0	0	0	0	0	0	0	0	0	0	0	0	100	0	0	0	0	0	0	0	0	0
ASV1731	Fungi	'uncultured fungus'	'uncultured fungus'	'uncultured fungus'	'uncultured fungus'	'uncultured fungus'	uncultured fungus	0	0	0	0	0	0	0	0	0	0	0	0	0	0	0	0	0	0	0	0	0	0	0	0	0	0	0	0	0	0	0	0	0	0	0	0	0	0	0	0	0	0
ASV1732		Bacillariophyta	Bacillariophyceae	Cymbellales	Gomphonemataceae	Gomphonema	Gomphonema saprophilum	0	0	0	0	0	0	0	0	0	0	0	0	0	0	0	0	0	0	0	0	0	0	0	0	0	0	0	0	0	0	0	0	0	0	0	0	0	0	0	0	0	0
ASV1733	Stramenopila	Heterokontophyta	Oomycetes	Peronosporales	Peronosporaceae	Phytophthora	Phytophthora nicotianae	0	0	0	0	0	0	0	0	0	0	0	0	0	0	0	0	0	0	0	0	0	0	0	0	0	0	0	0	0	0	0	0	0	0	0	0	0	0	0	0	0	0
ASV1734	Stramenopila	Heterokontophyta	Oomycetes	Pythiales	Pythiogetonaceae	Pythiogeton	Pythiogeton uniforme	0	0	0	0	0	0	0	0	0	0	0	0	0	0	0	0	0	0	0	0	0	0	0	0	0	0	0	0	0	0	0	0	0	0	0	0	0	0	0	0	0	0
ASV1735								0	0	0	0	0	0	0	0	0	0	0	36	0	0	0	0	0	0	0	0	0	0	0	0	0	0	0	0	0	0	0	0	0	0	0	0	0	0	0	0	0	0
ASV1736		Bacillariophyta	Bacillariophyceae	Surirellales	Surirellaceae	Surirella	Surirella sp. CCAP 1071/2	0	0	0	0	0	0	0	0	0	99	0	0	0	0	0	0	0	0	0	0	0	0	0	0	0	0	0	0	0	0	0	0	0	0	0	0	0	0	0	0	0	0
ASV1737	Fungi	'uncultured fungus'	'uncultured fungus'	'uncultured fungus'	'uncultured fungus'	'uncultured fungus'	uncultured fungus	0	0	0	0	0	0	0	0	0	0	0	0	0	99	0	0	0	0	0	0	0	0	0	0	0	0	0	0	0	0	0	0	0	0	0	0	0	0	0	0	0	0
ASV1738	Stramenopila	Heterokontophyta	Oomycetes	Leptomitales		Apodachlya	Apodachlya minima	0	0	0	0	0	0	0	0	0	0	0	0	0	0	0	0	99	0	0	0	0	0	0	0	0	0	0	0	0	0	0	0	0	0	0	0	0	0	0	0	0	0
ASV1739	Stramenopila	Heterokontophyta	Oomycetes	Pythiales	Pythiaceae	Pythium	Pythium irregulare	0	0	0	0	0	0	0	0	0	0	0	0	0	0	0	0	0	0	99	0	0	0	0	0	0	0	0	0	0	0	0	0	0	0	0	0	0	0	0	0	0	0
ASV1741	Metazoa	Chordata	Actinopteri		Ambassidae	Parambassis	Parambassis ranga	0	0	0	0	0	0	0	0	0	0	0	0	0	0	0	0	0	0	0	0	0	0	0	0	0	0	0	0	0	0	0	0	0	0	0	0	0	0	0	56	0	0
ASV1742			Chrysophyceae	Chromulinales	Chromulinaceae	'Spumella-like'	Spumella-like flagellate 194f	0	0	0	0	0	0	0	0	0	0	0	0	0	0	0	0	0	0	0	0	0	0	0	0	0	0	0	0	0	0	0	0	0	0	0	0	0	0	0	0	0	0
ASV1743	Stramenopila	Heterokontophyta	Oomycetes	Pythiales	Pythiaceae	Pythium	Pythium polymastum	0	0	0	0	0	0	0	0	0	0	0	0	0	0	0	0	0	0	0	0	0	0	0	0	0	0	0	0	0	0	0	0	0	0	0	0	0	0	0	0	0	0
ASV1744	Stramenopila	Heterokontophyta	Oomycetes	Pythiales	Pythiogetonaceae	Pythiogeton	Pythiogeton uniforme	0	0	0	0	0	0	0	0	0	0	0	0	0	0	0	0	0	0	0	0	0	0	0	0	0	0	0	0	0	0	0	0	0	0	0	0	0	0	0	0	0	0
ASV1745		'uncultured eukaryote'	'uncultured eukaryote'	'uncultured eukaryote'	'uncultured eukaryote'	'uncultured eukaryote'	uncultured eukaryote	0	0	0	0	0	0	0	0	0	0	0	0	0	0	0	0	0	0	0	0	0	0	0	0	0	0	0	0	0	0	0	0	0	0	0	0	0	0	0	0	0	0
ASV1746		'uncultured eukaryote'	'uncultured eukaryote'	'uncultured eukaryote'	'uncultured eukaryote'	'uncultured eukaryote'	uncultured eukaryote	0	0	0	0	0	0	0	0	0	0	0	0	0	0	0	0	0	0	0	0	0	0	0	0	0	0	0	0	0	0	0	0	0	0	0	0	0	0	0	0	0	0
ASV1747	Metazoa	Chordata	Actinopteri	Perciformes	Bovichtidae	Cottoperca	Cottoperca gobio	0	0	0	0	4	0	0	0	0	0	0	0	0	0	0	0	0	0	0	0	0	0	0	0	0	0	0	0	0	0	0	0	0	0	0	0	0	0	0	0	0	0
ASV1748	Stramenopila	Heterokontophyta	Oomycetes	Pythiales	Pythiaceae	Pythium	Pythium oligandrum	0	0	0	0	0	0	0	27	0	0	0	0	0	42	0	0	0	0	0	0	0	0	0	0	0	0	13	0	0	0	0	0	8	0	0	0	0	0	0	0	0	0
ASV1749	Fungi	'uncultured fungus'	'uncultured fungus'	'uncultured fungus'	'uncultured fungus'	'uncultured fungus'	uncultured fungus	0	0	0	0	0	0	0	0	0	0	0	0	0	0	0	0	0	0	0	0	0	0	0	0	0	0	0	0	0	0	0	0	0	0	0	0	0	0	0	0	0	0
ASV1750	Fungi	'uncultured fungus'	'uncultured fungus'	'uncultured fungus'	'uncultured fungus'	'uncultured fungus'	uncultured fungus	0	0	0	0	0	0	0	0	0	0	0	0	0	0	0	0	0	0	0	0	0	0	0	0	0	0	0	0	0	0	0	0	0	0	0	0	0	0	0	0	0	0
ASV1751	Metazoa	Chordata	Actinopteri	Kurtiformes	Apogonidae	Sphaeramia	Sphaeramia orbicularis	0	0	0	0	0	0	0	0	0	0	0	0	0	0	0	0	0	0	0	0	0	0	0	0	0	0	0	0	0	0	0	0	0	0	0	0	0	0	0	0	0	0
ASV1752	Stramenopila	Heterokontophyta	Oomycetes	Pythiales	Pythiaceae	Pythium	Pythium jasmonium	0	0	0	0	0	0	0	0	0	0	0	0	0	0	0	0	0	0	0	0	0	0	0	0	0	0	0	0	0	0	0	0	0	0	0	0	0	0	0	0	0	0
ASV1753		'uncultured eukaryote'	'uncultured eukaryote'	'uncultured eukaryote'	'uncultured eukaryote'	'uncultured eukaryote'	uncultured eukaryote	0	0	0	0	0	0	0	0	0	0	0	0	0	0	0	0	0	0	0	0	0	0	0	0	0	0	0	0	0	0	0	0	0	0	0	0	0	0	0	0	0	0
ASV1754	Fungi	'uncultured fungus'	'uncultured fungus'	'uncultured fungus'	'uncultured fungus'	'uncultured fungus'	uncultured fungus	0	0	0	0	0	0	0	0	0	0	0	0	0	0	0	0	0	0	0	0	0	0	0	0	0	0	0	0	0	0	0	0	0	0	0	0	0	0	0	0	0	0
ASV1755	Stramenopila	Heterokontophyta	Oomycetes	Peronosporales	Peronosporaceae	Hyaloperonospora	Hyaloperonospora cochleariae	0	0	0	0	0	0	0	0	0	0	0	0	0	0	0	0	0	0	0	0	0	0	0	0	0	0	0	0	0	0	0	0	0	0	0	0	0	0	0	0	0	0
ASV1756		'uncultured eukaryote'	'uncultured eukaryote'	'uncultured eukaryote'	'uncultured eukaryote'	'uncultured eukaryote'	uncultured eukaryote	0	0	0	0	0	0	0	0	0	0	0	0	0	0	0	0	0	0	0	0	0	0	0	0	0	0	0	0	0	0	0	0	0	0	0	0	0	0	0	0	0	0
ASV1757			Chrysophyceae	Chromulinales	Chromulinaceae	Spumella	Spumella vulgaris	12	0	2	0	0	0	0	0	0	0	0	0	0	0	0	0	0	0	0	0	0	0	0	0	0	0	0	0	0	0	0	0	10	0	0	0	0	0	0	0	0	0
ASV1758	Stramenopila	Heterokontophyta	Oomycetes	Pythiales	Pythiogetonaceae	Pythiogeton	Pythiogeton uniforme	0	0	0	0	0	0	0	0	0	0	0	0	0	0	0	0	0	0	0	0	0	0	34	0	0	0	0	0	0	0	0	0	0	0	0	0	0	0	0	0	0	0
ASV1759	Stramenopila	Heterokontophyta	Oomycetes	Pythiales	Pythiaceae	Globisporangium	Globisporangium ultimum	0	0	0	0	0	0	0	0	0	97	0	0	0	0	0	0	0	0	0	0	0	0	0	0	0	0	0	0	0	0	0	0	0	0	0	0	0	0	0	0	0	0
ASV1760	Stramenopila	Heterokontophyta	Oomycetes	Pythiales	Pythiaceae	Pythium	Pythium helicandrum	0	0	0	0	0	0	0	0	0	0	0	0	0	0	0	0	97	0	0	0	0	0	0	0	0	0	0	0	0	0	0	0	0	0	0	0	0	0	0	0	0	0
ASV1761			Chrysophyceae	Chromulinales	Chromulinaceae	Pedospumella	Pedospumella sp. JBM19	0	0	0	0	0	0	0	0	0	0	0	0	0	0	0	0	0	0	0	0	0	0	0	0	0	0	0	0	0	0	0	0	0	0	0	0	0	0	0	0	0	0
ASV1762	Fungi	'uncultured fungus'	'uncultured fungus'	'uncultured fungus'	'uncultured fungus'	'uncultured fungus'	uncultured fungus	0	0	0	0	0	0	0	0	0	0	0	0	0	0	0	0	0	0	0	0	0	0	0	0	0	0	0	0	0	0	0	0	0	0	0	0	0	0	0	0	0	0
ASV1763	Metazoa	Chordata	Actinopteri	Holocentriformes	Holocentridae	Myripristis	Myripristis murdjan	0	0	0	0	0	0	0	0	0	0	0	0	0	0	0	0	0	0	0	0	0	0	0	0	0	0	0	0	0	0	0	0	0	0	0	0	0	0	0	0	0	0
ASV1764	Fungi	'uncultured fungus'	'uncultured fungus'	'uncultured fungus'	'uncultured fungus'	'uncultured fungus'	uncultured fungus	0	0	0	0	0	0	0	0	0	0	0	0	0	0	0	0	0	0	0	0	0	0	0	0	0	0	0	0	0	0	0	0	0	0	0	0	0	0	0	0	0	0
ASV1765	Fungi	'uncultured fungus'	'uncultured fungus'	'uncultured fungus'	'uncultured fungus'	'uncultured fungus'	uncultured fungus	0	2	0	0	0	0	0	0	0	0	0	0	0	0	0	0	0	0	0	0	0	0	27	0	0	0	0	0	0	0	0	0	0	0	0	0	0	0	0	0	0	0
ASV1766			Chrysophyceae			Segregatospumella	Segregatospumella sp.	0	0	0	0	0	0	0	0	0	0	0	0	0	0	0	0	0	0	0	0	0	0	0	0	0	90	0	0	0	0	0	0	0	0	0	0	0	0	0	0	0	0
ASV1767	Stramenopila	Heterokontophyta	Oomycetes	Leptomitales		Apodachlya	Apodachlya minima	0	0	0	0	0	0	0	0	0	0	0	0	96	0	0	0	0	0	0	0	0	0	0	0	0	0	0	0	0	0	0	0	0	0	0	0	0	0	0	0	0	0
ASV1768	Stramenopila	Heterokontophyta	Oomycetes	Pythiales	Pythiaceae	Pythium	Pythium rostratum	0	0	0	0	0	0	0	0	0	0	0	0	0	0	0	0	0	0	0	0	0	0	0	5	0	0	0	0	0	0	0	91	0	0	0	0	0	0	0	0	0	0
ASV1769	Metazoa	Chordata	Aves	Passeriformes	Thraupidae	Geospiza	Geospiza fortis	0	0	0	0	0	0	0	0	0	0	0	0	0	0	0	0	0	0	0	0	0	0	0	0	0	0	96	0	0	0	0	0	0	0	0	0	0	0	0	0	0	0
ASV1770	Stramenopila	Heterokontophyta	Oomycetes	Pythiales	Pythiogetonaceae	Pythiogeton	Pythiogeton uniforme	0	0	0	0	0	0	0	0	0	0	0	0	0	0	0	0	0	0	0	0	0	0	0	0	0	0	0	0	0	0	0	0	0	0	0	50	0	0	0	0	0	0
ASV1771	Stramenopila	Heterokontophyta	Oomycetes	Saprolegniales	Saprolegniaceae	Achlya	Achlya bisexualis	0	0	0	0	0	0	0	0	0	0	0	0	0	0	0	0	0	0	0	0	0	0	0	0	0	0	0	0	0	0	0	0	0	0	0	0	0	0	0	0	0	0
ASV1772			Chrysophyceae	Chromulinales	Chromulinaceae	Spumella	Spumella sp.	0	0	0	0	0	0	0	0	0	0	0	0	0	0	0	0	0	0	0	0	0	0	0	0	0	0	0	0	0	0	0	0	0	0	0	0	0	0	0	0	0	0
ASV1773			Chrysophyceae	Chromulinales	Chromulinaceae	'Spumella-like'	Spumella-like flagellate 194f	0	0	0	0	0	0	0	0	0	0	0	0	0	0	0	0	0	0	0	0	0	0	0	0	0	0	0	0	0	0	0	0	0	0	0	0	0	0	0	0	0	0
ASV1774			Chrysophyceae	Chromulinales	Chromulinaceae	Spumella	Spumella sp.	0	0	0	0	0	0	0	0	0	0	0	0	0	0	0	0	0	0	0	0	0	0	0	0	0	0	0	0	0	0	0	0	0	0	0	0	0	0	0	0	0	0
ASV1775	Stramenopila	Heterokontophyta	Oomycetes	Pythiales	Pythiogetonaceae	Pythiogeton	Pythiogeton uniforme	0	0	0	0	0	0	0	0	0	0	0	0	0	0	0	0	0	0	0	0	0	0	0	0	0	0	0	0	0	0	0	0	0	0	0	0	0	0	0	0	0	0
ASV1776	Fungi	'uncultured fungus'	'uncultured fungus'	'uncultured fungus'	'uncultured fungus'	'uncultured fungus'	uncultured fungus	0	0	0	0	0	0	0	0	0	0	0	0	0	0	0	0	0	0	0	0	0	0	0	0	0	0	0	0	0	0	0	0	0	0	0	0	0	0	0	0	0	0
ASV1777	Fungi	'uncultured fungus'	'uncultured fungus'	'uncultured fungus'	'uncultured fungus'	'uncultured fungus'	uncultured fungus	0	0	0	0	0	0	0	0	0	2	0	0	0	0	0	0	0	0	0	0	0	0	0	0	0	0	0	0	0	0	0	0	0	0	0	0	0	0	0	0	0	0
ASV1778			Chrysophyceae	Chromulinales	Chromulinaceae	Spumella	Spumella sp.	0	0	0	0	0	0	0	0	0	25	0	0	0	0	0	0	0	0	0	0	0	0	0	0	50	0	0	0	0	0	0	0	0	0	0	0	0	0	0	0	0	0
ASV1779	Stramenopila	Heterokontophyta	Oomycetes	Pythiales	Pythiogetonaceae	Pythiogeton	Pythiogeton puliense	0	0	0	0	0	5	0	0	0	0	0	0	0	0	0	0	0	0	0	90	0	0	0	0	0	0	0	0	0	0	0	0	0	0	0	0	0	0	0	0	0	0
ASV1780			Chrysophyceae	Chromulinales	Chromulinaceae	Spumella	Spumella lacusvadosi	0	0	0	0	0	0	0	18	77	0	0	0	0	0	0	0	0	0	0	0	0	0	0	0	0	0	0	0	0	0	0	0	0	0	0	0	0	0	0	0	0	0
ASV1781	Stramenopila	Heterokontophyta	Oomycetes	Pythiales	Pythiaceae	Pythium	Pythium barbulae	0	0	0	0	0	0	0	0	0	0	0	0	0	95	0	0	0	0	0	0	0	0	0	0	0	0	0	0	0	0	0	0	0	0	0	0	0	0	0	0	0	0
ASV1782	Viridiplantae	Streptophyta	Magnoliopsida	Gentianales	Apocynaceae	Ochrosia	Ochrosia miana	0	0	0	0	0	0	0	0	0	0	0	0	0	0	0	12	0	0	0	0	0	0	80	3	0	0	0	0	0	0	0	0	0	0	0	0	0	0	0	0	0	0
ASV1783		Proteobacteria	Gammaproteobacteria	Enterobacterales	Erwiniaceae	Buchnera	Buchnera aphidicola	0	0	0	0	0	0	0	0	0	0	0	0	0	0	0	0	0	0	0	0	0	49	46	0	0	0	0	0	0	0	0	0	0	0	0	0	0	0	0	0	0	0
ASV1784	Metazoa	Nematoda	Chromadorea	Rhabditida	Strongyloididae	Strongyloides	Strongyloides ratti	0	0	0	0	0	0	0	0	0	0	0	0	0	0	0	0	0	0	0	0	0	0	0	0	0	0	0	0	0	0	0	95	0	0	0	0	0	0	0	0	0	0
ASV1785	Fungi	'uncultured fungus'	'uncultured fungus'	'uncultured fungus'	'uncultured fungus'	'uncultured fungus'	uncultured fungus	0	0	0	0	0	0	0	0	0	0	0	0	0	0	0	0	0	0	0	0	0	0	0	0	0	0	0	0	0	0	0	0	0	0	0	0	0	0	0	0	0	0
ASV1786	Fungi	'uncultured fungus'	'uncultured fungus'	'uncultured fungus'	'uncultured fungus'	'uncultured fungus'	uncultured fungus	0	0	0	0	0	0	0	0	0	0	0	0	0	0	0	0	0	0	0	0	0	0	0	0	0	0	0	0	0	0	0	0	0	0	0	0	0	0	0	0	0	0
ASV1787	Metazoa	Chordata	Actinopteri	Holocentriformes	Holocentridae	Myripristis	Myripristis murdjan	0	0	0	0	0	0	0	0	0	0	0	0	0	0	0	0	0	0	0	0	0	0	0	0	0	0	0	0	0	0	0	0	0	0	0	0	0	0	0	0	0	0
ASV1788	Stramenopila	Heterokontophyta	Oomycetes	Pythiales	Pythiaceae	Pythium	Pythium megalacanthum	0	0	0	0	0	0	0	0	0	0	0	0	0	0	0	0	0	0	0	0	0	0	0	0	0	0	0	0	0	0	0	0	0	0	0	0	0	0	0	0	0	0
ASV1789	Stramenopila	Heterokontophyta	Oomycetes	Pythiales	Pythiaceae	Pythium	Pythium myriotylum	0	0	0	0	0	0	0	0	0	0	0	0	0	0	0	0	0	0	0	0	0	0	0	0	0	0	0	0	0	0	0	0	0	0	0	0	0	0	0	0	0	0
ASV1790		Apicomplexa	Aconoidasida	Haemosporida	Plasmodiidae	Plasmodium	Plasmodium falciparum	0	0	0	0	0	0	0	0	0	0	0	0	0	0	0	0	0	0	0	0	0	0	0	0	0	0	0	0	0	0	0	0	0	0	0	0	0	0	0	0	0	0
ASV1791			Chrysophyceae			Segregatospumella	Segregatospumella sp.	0	0	0	0	0	0	0	0	0	0	0	0	0	0	0	0	0	0	0	0	0	0	0	0	0	0	0	0	0	0	0	0	0	0	0	0	0	0	0	0	0	0
ASV1792			Chrysophyceae	Chromulinales	Chromulinaceae	Spumella	Spumella sp.	0	0	0	0	0	0	0	0	0	0	0	0	0	64	0	0	0	0	0	0	0	0	0	0	0	0	0	0	0	0	0	0	0	0	0	0	0	0	0	25	0	0
ASV1793			Chrysophyceae	Chromulinales	Chromulinaceae	'Spumella-like'	Spumella-like flagellate Got220	0	0	69	0	0	0	0	0	0	0	0	0	0	0	0	0	0	0	0	0	0	0	0	0	0	0	0	0	0	0	0	0	0	0	0	0	0	0	0	0	0	0
ASV1794	Metazoa	Chordata	Mammalia	Primates	Hominidae	Homo	Homo sapiens	0	0	0	5	0	0	0	0	0	0	0	0	0	0	0	0	0	0	0	0	0	67	22	0	0	0	0	0	0	0	0	0	0	0	0	0	0	0	0	0	0	0
ASV1795	Fungi	'uncultured fungus'	'uncultured fungus'	'uncultured fungus'	'uncultured fungus'	'uncultured fungus'	uncultured fungus	0	0	0	0	0	0	16	78	0	0	0	0	0	0	0	0	0	0	0	0	0	0	0	0	0	0	0	0	0	0	0	0	0	0	0	0	0	0	0	0	0	0
ASV1796	Stramenopila	Heterokontophyta	Oomycetes	Pythiales	Pythiaceae	Pythium	Pythium okanoganense	0	0	0	0	0	0	0	94	0	0	0	0	0	0	0	0	0	0	0	0	0	0	0	0	0	0	0	0	0	0	0	0	0	0	0	0	0	0	0	0	0	0
ASV1797	Metazoa	Chordata	Actinopteri	Blenniiformes	Gobiesocidae	Gouania	Gouania willdenowi	0	0	0	0	0	0	0	0	0	0	0	0	0	0	0	0	0	0	0	0	0	0	0	0	0	0	0	0	0	0	0	0	0	0	0	93	0	0	0	0	0	0
ASV1798		Bacillariophyta	Bacillariophyceae	Bacillariales	Bacillariaceae	Nitzschia	Nitzschia palea	0	0	0	0	0	0	0	0	0	0	0	0	0	0	0	0	0	0	0	0	0	0	0	0	0	0	0	0	0	0	0	0	0	0	0	0	5	0	0	0	0	0
ASV1799		Apicomplexa	Aconoidasida	Haemosporida	Plasmodiidae	Plasmodium	Plasmodium falciparum	0	0	0	0	0	0	0	0	0	0	0	0	0	0	0	0	0	0	0	0	0	0	0	0	0	0	0	0	0	0	0	0	0	0	0	0	0	0	0	65	0	0
ASV1800			Chrysophyceae	Chromulinales	Chromulinaceae	Spumella	Spumella vulgaris	0	0	0	0	0	0	0	0	0	0	0	0	0	0	0	0	0	0	0	0	0	0	0	0	0	0	0	0	0	0	0	0	0	0	0	0	0	0	0	0	0	0
ASV1801	Metazoa	Arthropoda	Hexanauplia	Siphonostomatoida	Caligidae	Caligus	Caligus rogercresseyi	0	0	0	0	0	0	0	0	0	0	0	0	0	0	0	0	0	0	0	0	0	0	0	0	0	0	0	0	0	0	0	0	0	0	0	0	0	0	0	0	0	0
ASV1802	Stramenopila	Heterokontophyta	Oomycetes	Lagenidiales	Haliphthoraceae	Atkinsiella	Atkinsiella dubia	0	0	0	0	0	0	0	0	0	0	0	0	0	0	0	0	0	0	0	0	0	0	0	0	0	0	0	0	0	0	0	0	0	0	0	0	0	0	0	0	0	0
ASV1803		'uncultured eukaryote'	'uncultured eukaryote'	'uncultured eukaryote'	'uncultured eukaryote'	'uncultured eukaryote'	uncultured eukaryote	0	0	0	0	0	0	0	0	0	0	0	0	0	0	0	0	0	0	0	0	0	0	0	0	0	0	0	0	0	0	0	0	0	0	0	0	0	0	0	0	0	0
ASV1804	Metazoa	Chordata	Actinopteri	Cypriniformes	Cyprinidae	Danio	Danio rerio	0	0	0	0	0	0	0	0	0	0	0	0	0	0	0	0	0	0	0	0	0	0	52	0	0	0	0	0	0	0	0	0	0	0	0	0	0	0	0	0	0	0
ASV1805		Ciliophora	Oligohymenophorea	Hymenostomatida	Tetrahymenidae	Tetrahymena	Tetrahymena thermophila	0	0	0	0	0	0	0	0	0	0	0	0	0	0	0	0	0	0	0	0	0	0	93	0	0	0	0	0	0	0	0	0	0	0	0	0	0	0	0	0	0	0
ASV1806	Fungi	'uncultured fungus'	'uncultured fungus'	'uncultured fungus'	'uncultured fungus'	'uncultured fungus'	uncultured fungus	0	0	0	0	0	0	0	0	0	0	0	0	0	0	0	0	0	0	0	0	0	0	0	0	0	0	0	0	0	0	0	0	0	0	0	0	0	0	0	0	0	0
ASV1807	Stramenopila	Heterokontophyta	Oomycetes	Pythiales	Pythiaceae	Pythium	Pythium rostratum	0	0	0	0	0	0	0	0	0	0	0	0	0	0	0	0	0	0	0	0	0	0	0	0	0	0	0	0	0	0	0	0	0	0	0	0	0	0	0	0	0	0
ASV1808			Chrysophyceae	Chromulinales	Chromulinaceae	'Spumella-like'	Spumella-like flagellate 1031	0	0	0	0	0	0	0	0	0	0	0	0	0	0	0	0	0	0	0	0	0	0	0	0	0	57	0	0	0	0	0	0	0	0	0	0	0	0	0	0	0	0
ASV1809			Chrysophyceae	Chromulinales	Chromulinaceae	'Spumella-like'	Spumella-like flagellate 391f	0	0	0	0	0	0	0	29	0	0	0	0	0	25	0	0	0	0	0	0	0	0	0	0	8	0	0	0	0	0	0	0	0	0	0	0	0	0	0	0	0	0
ASV1810			Chrysophyceae	Chromulinales	Chromulinaceae	'Spumella-like'	Spumella-like flagellate 391f	0	0	0	0	0	0	0	0	0	0	0	0	0	0	0	0	0	0	0	0	0	0	0	0	0	0	0	0	0	0	0	0	0	0	0	0	0	0	0	0	0	0
ASV1811	Stramenopila	Heterokontophyta	Oomycetes	Peronosporales	Peronosporaceae	Phytophthora	Phytophthora cambivora	0	0	0	92	0	0	0	0	0	0	0	0	0	0	0	0	0	0	0	0	0	0	0	0	0	0	0	0	0	0	0	0	0	0	0	0	0	0	0	0	0	0
ASV1812		Bacillariophyta	Bacillariophyceae	Surirellales	Surirellaceae	Surirella	Surirella sp. CCAP 1071/2	0	0	0	0	0	0	0	0	92	0	0	0	0	0	0	0	0	0	0	0	0	0	0	0	0	0	0	0	0	0	0	0	0	0	0	0	0	0	0	0	0	0
ASV1813	Stramenopila	Heterokontophyta	Oomycetes	Saprolegniales	Saprolegniaceae	Saprolegnia	Saprolegnia delica	0	0	0	0	0	0	0	0	92	0	0	0	0	0	0	0	0	0	0	0	0	0	0	0	0	0	0	0	0	0	0	0	0	0	0	0	0	0	0	0	0	0
ASV1814			Chrysophyceae			Segregatospumella	Segregatospumella sp.	0	0	0	0	0	0	0	0	0	0	0	0	0	0	0	0	0	0	0	0	0	0	0	0	0	0	0	0	0	0	0	0	0	0	0	0	91	0	0	0	0	0
ASV1815	Viridiplantae	Streptophyta	Magnoliopsida	Brassicales	Brassicaceae	Brassica	Brassica rapa	0	0	0	0	0	0	0	0	0	0	0	0	0	0	0	0	0	0	0	0	0	0	0	0	0	0	0	0	0	0	0	0	0	0	0	0	0	0	0	0	0	0
ASV1816	Fungi	'uncultured fungus'	'uncultured fungus'	'uncultured fungus'	'uncultured fungus'	'uncultured fungus'	uncultured fungus	0	0	0	0	0	0	0	0	0	0	0	0	0	0	0	0	0	0	0	0	0	0	0	0	0	0	0	0	0	0	0	0	0	0	0	0	0	0	0	0	0	0
ASV1817		Bacillariophyta	'uncultured freshwater diatom'	'uncultured freshwater diatom'	'uncultured freshwater diatom'	'uncultured freshwater diatom'	uncultured freshwater diatom	0	0	0	0	0	0	0	0	0	0	0	0	0	0	0	0	0	0	0	0	0	0	0	0	0	0	0	0	0	0	0	0	0	0	0	0	0	0	0	0	0	0
ASV1818	Stramenopila	Heterokontophyta	Oomycetes	Pythiales	Pythiaceae	Phytopythium	Phytopythium litorale	0	0	0	0	0	0	0	0	0	0	0	0	0	0	0	0	0	0	0	0	0	0	0	0	0	0	0	0	0	0	0	0	0	0	0	0	0	0	0	0	0	0
ASV1819		Proteobacteria	Gammaproteobacteria	Enterobacterales	Enterobacteriaceae	Cedecea	Cedecea neteri	0	0	0	0	0	0	0	0	0	0	0	0	0	0	0	0	0	0	0	0	0	0	0	0	0	0	0	0	78	0	0	0	0	0	0	0	0	0	0	0	13	0
ASV1820			Chrysophyceae	Chromulinales	Chromulinaceae	Pedospumella	Pedospumella sp. JBM19	0	0	0	0	0	0	0	0	0	0	0	0	0	0	0	0	0	0	0	0	0	0	91	0	0	0	0	0	0	0	0	0	0	0	0	0	0	0	0	0	0	0
ASV1821	Viridiplantae	Streptophyta	Magnoliopsida	Fabales	Fabaceae	Cicer	Cicer arietinum	0	0	0	0	0	0	0	0	0	0	0	0	0	0	0	0	0	0	0	0	0	0	0	0	0	0	0	0	0	0	0	91	0	0	0	0	0	0	0	0	0	0
ASV1822		'uncultured eukaryote'	'uncultured eukaryote'	'uncultured eukaryote'	'uncultured eukaryote'	'uncultured eukaryote'	uncultured eukaryote	0	0	0	0	0	0	0	0	0	0	0	0	0	0	0	0	0	0	0	0	0	0	0	0	0	0	0	0	0	0	0	0	0	0	0	0	0	0	21	0	0	0
ASV1823	Metazoa	Chordata	Mammalia	Primates	Hominidae	Homo	Homo sapiens	0	0	0	0	0	0	0	0	0	0	0	0	0	0	0	0	0	0	0	0	0	0	0	0	0	0	0	0	0	0	0	0	0	0	0	0	0	0	0	0	0	0
ASV1824	Fungi	'uncultured fungus'	'uncultured fungus'	'uncultured fungus'	'uncultured fungus'	'uncultured fungus'	uncultured fungus	0	0	0	0	0	0	0	0	0	0	0	0	0	0	0	0	0	0	0	0	0	0	0	0	0	0	0	0	0	0	0	0	0	0	0	0	0	0	0	0	0	0
ASV1825		'uncultured eukaryote'	'uncultured eukaryote'	'uncultured eukaryote'	'uncultured eukaryote'	'uncultured eukaryote'	uncultured eukaryote	0	0	0	0	0	0	0	0	0	0	0	0	0	0	0	0	0	0	0	0	0	0	0	0	0	0	0	0	0	0	0	0	0	0	0	0	0	0	0	0	0	0
ASV1826	Fungi	'uncultured fungus'	'uncultured fungus'	'uncultured fungus'	'uncultured fungus'	'uncultured fungus'	uncultured fungus	0	0	0	0	0	0	0	0	0	0	0	0	0	0	0	0	0	0	0	0	0	0	0	0	0	0	0	0	0	0	0	0	0	0	0	0	0	0	0	0	0	0
ASV1827		'uncultured eukaryote'	'uncultured eukaryote'	'uncultured eukaryote'	'uncultured eukaryote'	'uncultured eukaryote'	uncultured eukaryote	0	0	0	0	0	0	0	0	0	0	0	0	0	0	0	0	0	0	0	0	0	0	0	0	0	0	0	0	0	0	0	0	0	0	0	0	0	0	0	0	0	0
ASV1828	Metazoa	Chordata	Actinopteri	Salmoniformes	Salmonidae	Coregonus	Coregonus sp. 'balchen'	0	0	0	0	0	0	0	0	0	0	0	0	0	0	0	0	0	0	0	0	0	0	0	0	0	0	0	0	0	0	0	0	66	0	0	0	0	0	0	0	0	0
ASV1829	Metazoa	Chordata	Actinopteri	Beloniformes	Adrianichthyidae	Oryzias	Oryzias latipes	0	0	0	9	0	0	0	0	0	0	0	0	0	0	0	0	0	0	0	0	0	81	0	0	0	0	0	0	0	0	0	0	0	0	0	0	0	0	0	0	0	0
ASV1830			Chrysophyceae			'Spumella-like'	Spumella-like flagellate JBC/S24	0	0	0	0	0	0	0	0	0	77	0	0	0	0	0	0	0	0	0	0	0	0	0	13	0	0	0	0	0	0	0	0	0	0	0	0	0	0	0	0	0	0
ASV1831	Stramenopila	Heterokontophyta	Oomycetes	Pythiales	Pythiaceae	Pythium	Pythium aff. monospermum	0	0	0	0	0	0	0	0	0	0	0	90	0	0	0	0	0	0	0	0	0	0	0	0	0	0	0	0	0	0	0	0	0	0	0	0	0	0	0	0	0	0
ASV1832	Stramenopila	Heterokontophyta	Oomycetes	Peronosporales	Peronosporaceae	Phytophthora	Phytophthora undulata	0	0	0	0	0	0	0	0	0	0	0	0	0	0	0	0	0	0	0	0	0	0	0	0	0	0	0	0	0	0	0	0	0	0	0	0	89	0	0	0	0	0
ASV1833	Stramenopila	Heterokontophyta	Oomycetes	Saprolegniales	Saprolegniaceae	Saprolegnia	Saprolegnia sp.	0	0	0	0	0	0	0	0	0	0	0	0	0	0	0	0	0	0	0	0	0	0	0	0	0	0	0	0	0	0	0	0	0	0	0	0	0	0	0	0	0	0
ASV1834	Fungi	'uncultured fungus'	'uncultured fungus'	'uncultured fungus'	'uncultured fungus'	'uncultured fungus'	uncultured fungus	0	0	0	0	0	0	0	0	0	0	0	0	0	0	0	0	0	0	0	0	0	0	0	0	0	0	0	0	0	0	0	0	0	0	0	0	0	0	0	0	0	0
ASV1835			Chrysophyceae	Chromulinales	Chromulinaceae	Spumella	Spumella sp.	0	0	0	0	0	0	0	0	0	0	0	0	0	0	0	0	0	0	0	0	0	0	0	0	0	0	0	0	0	0	0	0	0	0	0	0	0	0	0	0	0	0
ASV1836	Fungi	'uncultured fungus'	'uncultured fungus'	'uncultured fungus'	'uncultured fungus'	'uncultured fungus'	uncultured fungus	0	0	0	0	0	0	0	0	41	2	0	0	0	0	0	0	0	0	0	0	0	0	0	0	0	0	0	0	0	0	0	0	0	0	0	0	0	0	0	0	0	0
ASV1837	Stramenopila	Heterokontophyta	Oomycetes	Pythiales	Pythiaceae	Pythium	Pythium sp. unique1sub3	0	0	0	0	0	0	0	0	0	0	0	0	89	0	0	0	0	0	0	0	0	0	0	0	0	0	0	0	0	0	0	0	0	0	0	0	0	0	0	0	0	0
ASV1839	Metazoa	Chordata		Testudines	Cheloniidae	Chelonia	Chelonia mydas	0	0	0	0	0	0	0	0	0	0	0	0	0	0	0	0	0	0	0	0	0	0	0	0	0	0	0	0	0	0	0	0	0	0	0	0	0	0	0	0	0	0
ASV1840	Fungi	'uncultured fungus'	'uncultured fungus'	'uncultured fungus'	'uncultured fungus'	'uncultured fungus'	uncultured fungus	0	0	0	0	0	0	0	0	0	0	0	0	0	0	0	0	0	0	0	0	0	0	0	0	0	0	0	0	0	0	0	0	0	0	0	0	0	0	0	0	0	0
ASV1841	Viridiplantae	Streptophyta	Magnoliopsida	Brassicales	Brassicaceae	Arabis	Arabis alpina	0	0	0	0	0	0	0	0	0	0	0	0	0	0	0	0	0	0	0	0	0	0	0	0	0	0	0	0	0	0	0	0	0	0	0	0	0	0	0	0	0	0
ASV1842	Fungi	'uncultured fungus'	'uncultured fungus'	'uncultured fungus'	'uncultured fungus'	'uncultured fungus'	uncultured fungus	0	0	0	0	0	0	0	0	0	0	0	0	0	0	0	0	0	0	0	0	0	0	0	0	0	0	0	0	0	0	0	0	0	0	0	0	0	0	0	0	0	0
ASV1843		Ciliophora	Oligohymenophorea	Hymenostomatida	Tetrahymenidae	Tetrahymena	Tetrahymena thermophila	0	0	0	0	0	0	0	0	0	0	0	0	0	0	0	0	0	0	0	0	0	0	0	0	0	0	0	0	0	0	0	0	0	0	0	0	0	0	0	0	0	0
ASV1844	Fungi	'uncultured fungus'	'uncultured fungus'	'uncultured fungus'	'uncultured fungus'	'uncultured fungus'	uncultured fungus	0	0	0	0	0	0	0	0	0	0	0	0	0	0	0	0	0	0	0	0	0	0	0	0	0	0	0	0	0	0	0	0	0	0	0	0	0	0	0	0	0	0
ASV1845			Dinophyceae	Prorocentrales	Prorocentraceae	Prorocentrum	Prorocentrum micans	0	0	0	0	0	0	0	0	0	0	0	0	0	0	0	0	0	0	0	0	0	0	0	0	0	0	0	0	0	0	0	0	0	0	0	0	0	0	0	0	0	0
ASV1846	Fungi	'uncultured fungus'	'uncultured fungus'	'uncultured fungus'	'uncultured fungus'	'uncultured fungus'	uncultured fungus	0	0	0	0	0	0	0	0	0	0	0	0	0	0	0	0	0	0	0	0	0	0	0	0	0	0	0	0	0	0	0	0	0	0	0	0	0	0	0	0	0	0
ASV1847	Stramenopila	Heterokontophyta	Oomycetes	Saprolegniales	Saprolegniaceae	Saprolegnia	Saprolegnia sp. SAP1	0	0	0	0	0	0	0	0	0	0	0	0	0	0	0	0	0	0	0	0	0	0	0	0	0	0	0	0	0	0	0	0	0	0	0	0	0	0	0	0	0	0
ASV1848		'uncultured eukaryote'	'uncultured eukaryote'	'uncultured eukaryote'	'uncultured eukaryote'	'uncultured eukaryote'	uncultured eukaryote	0	0	0	0	0	0	0	0	0	0	0	5	0	0	0	0	0	0	0	0	0	0	0	0	0	0	0	0	0	0	0	0	0	0	0	0	0	0	0	0	0	0
ASV1849	Viridiplantae	Streptophyta	Magnoliopsida	Brassicales	Brassicaceae	Arabidopsis	Arabidopsis thaliana	0	0	0	0	0	0	0	0	0	0	0	0	0	0	0	0	0	0	0	0	0	0	88	0	0	0	0	0	0	0	0	0	0	0	0	0	0	0	0	0	0	0
ASV1851	Viridiplantae	Streptophyta	Magnoliopsida	Malvales	Malvaceae	Gossypium	Gossypium turneri	0	0	0	0	0	0	0	0	0	0	0	0	0	0	0	0	0	0	0	0	0	0	0	0	0	0	0	0	0	0	0	0	0	0	0	0	0	0	0	0	59	0
ASV1852	Fungi	'uncultured fungus'	'uncultured fungus'	'uncultured fungus'	'uncultured fungus'	'uncultured fungus'	uncultured fungus	0	0	0	0	0	0	0	0	0	0	0	0	0	0	0	0	0	0	0	0	0	0	0	0	0	0	0	0	0	0	0	0	0	0	0	0	0	0	0	0	0	0
ASV1853	Stramenopila	Heterokontophyta	Oomycetes	Peronosporales	Peronosporaceae	Phytophthora	Phytophthora undulata	0	0	0	0	0	0	0	0	0	0	0	0	0	0	0	0	0	0	0	0	0	0	0	0	0	0	0	0	0	0	0	0	0	0	0	0	0	0	0	0	0	0
ASV1854	Fungi	'uncultured fungus'	'uncultured fungus'	'uncultured fungus'	'uncultured fungus'	'uncultured fungus'	uncultured fungus	0	0	0	0	0	0	0	0	0	0	0	0	0	0	0	0	0	0	0	0	0	0	0	0	0	0	0	0	0	0	0	0	0	0	0	0	0	0	0	0	0	0
ASV1855	Metazoa	Chordata	Actinopteri	Syngnathiformes	Syngnathidae	Syngnathus	Syngnathus acus	0	0	0	0	0	0	0	0	0	0	0	0	0	0	0	0	0	0	0	0	0	0	0	0	0	0	0	0	0	0	0	0	0	0	0	0	0	0	0	0	0	0
ASV1856	Stramenopila	Heterokontophyta	Oomycetes	Pythiales	Pythiaceae	Pythium	Pythium rostratum	0	0	0	0	0	0	0	0	0	0	0	0	0	0	0	0	0	0	0	0	0	0	0	0	0	0	0	0	0	0	0	0	0	0	0	0	0	0	0	0	0	0
ASV1857	Stramenopila	Heterokontophyta	Oomycetes	Peronosporales	Peronosporaceae	Hyaloperonospora	Hyaloperonospora cochleariae	0	0	0	0	0	0	0	0	0	0	0	0	0	0	0	0	0	0	0	0	0	0	0	0	0	0	0	0	0	0	0	0	37	0	0	0	0	0	0	0	0	0
ASV1858	Fungi	'uncultured fungus'	'uncultured fungus'	'uncultured fungus'	'uncultured fungus'	'uncultured fungus'	uncultured fungus	0	0	0	0	0	0	0	0	0	0	53	0	0	0	0	0	0	0	0	0	0	0	0	0	4	0	0	0	0	0	0	0	0	0	30	0	0	0	0	0	0	0
ASV1859	Stramenopila	Heterokontophyta	Oomycetes	Peronosporales	Peronosporaceae	Phytophthora	Phytophthora cambivora	0	0	87	0	0	0	0	0	0	0	0	0	0	0	0	0	0	0	0	0	0	0	0	0	0	0	0	0	0	0	0	0	0	0	0	0	0	0	0	0	0	0
ASV1860	Viridiplantae	Streptophyta	Magnoliopsida	Malpighiales	Salicaceae	Populus	Populus trichocarpa	0	0	0	0	0	0	0	87	0	0	0	0	0	0	0	0	0	0	0	0	0	0	0	0	0	0	0	0	0	0	0	0	0	0	0	0	0	0	0	0	0	0
ASV1861			Chrysophyceae	Chromulinales	Chromulinaceae	Spumella	Spumella vulgaris	0	0	0	0	0	0	0	0	0	0	25	0	0	0	0	0	0	0	0	0	0	0	0	0	0	0	0	0	38	0	0	0	24	0	0	0	0	0	0	0	0	0
ASV1862	Stramenopila	Heterokontophyta	Oomycetes	Pythiales	Pythiaceae	Phytopythium	Phytopythium citrinum	0	0	0	0	0	0	0	0	0	0	0	0	0	0	0	0	0	0	0	0	0	0	0	0	0	0	0	0	0	0	0	0	0	0	0	0	0	0	0	0	0	0
ASV1863	Fungi	'uncultured fungus'	'uncultured fungus'	'uncultured fungus'	'uncultured fungus'	'uncultured fungus'	uncultured fungus	0	0	0	0	0	0	0	0	0	0	0	0	0	0	0	0	0	0	0	0	0	0	0	0	0	0	0	0	0	0	0	0	0	0	0	0	0	0	0	0	0	0
ASV1864			Chrysophyceae	Chromulinales	Chromulinaceae	'Spumella-like'	Spumella-like flagellate 391f	0	0	0	0	0	0	0	0	0	0	0	0	0	0	0	0	0	0	0	0	0	0	0	0	0	0	0	0	0	0	0	0	0	0	0	0	0	0	0	0	0	0
ASV1865	Viridiplantae	Streptophyta	Magnoliopsida	Ranunculales	Papaveraceae	Papaver	Papaver somniferum	0	0	0	0	0	0	0	0	0	0	0	0	0	0	0	0	0	0	0	0	0	0	0	0	0	0	0	0	0	0	0	0	0	0	0	0	0	0	0	0	0	0
ASV1866		Apicomplexa	Aconoidasida	Haemosporida	Plasmodiidae	Plasmodium	Plasmodium sp. gorilla clade G2	0	0	0	0	0	0	0	0	0	0	0	0	0	0	0	0	0	0	0	0	0	0	0	0	0	0	0	0	0	0	0	0	0	0	0	0	0	0	0	0	0	0
ASV1867	Metazoa	Chordata	Mammalia	Artiodactyla	Bovidae	Bos	Bos mutus	0	0	0	0	0	0	0	0	0	0	0	0	0	0	0	0	0	0	0	0	0	0	0	0	0	0	0	0	0	0	0	0	0	0	0	0	0	0	0	0	0	0
ASV1868	Stramenopila	Heterokontophyta	Oomycetes	Pythiales	Pythiaceae	Pythium	Pythium middletonii	0	0	0	0	0	0	0	0	0	0	0	0	0	0	0	0	0	0	0	0	0	0	0	0	0	0	0	0	0	0	0	0	0	0	0	0	0	0	0	0	0	0
ASV1869			Chrysophyceae	Chromulinales	Chromulinaceae	'Spumella-like'	Spumella-like flagellate 391f	0	0	0	0	0	0	0	0	0	0	0	0	0	49	0	0	0	0	0	0	0	0	0	0	0	0	0	0	0	0	0	0	29	0	0	0	0	0	0	0	0	0
ASV1870			Chrysophyceae	Chromulinales	Chromulinaceae	'Spumella-like'	Spumella-like flagellate 194f	0	0	0	0	0	0	0	0	0	0	0	0	0	0	0	0	0	0	0	0	0	0	0	0	0	0	0	0	0	0	0	0	0	0	0	0	85	0	0	0	0	0
ASV1871	Metazoa	Chordata	Aves	Apterygiformes	Apterygidae	Apteryx	Apteryx mantelli	0	0	0	0	0	0	0	0	0	0	0	0	0	0	0	0	0	0	0	0	0	0	0	0	0	0	0	0	0	0	0	0	0	0	0	0	0	0	0	85	0	0
ASV1872			Chrysophyceae	Chromulinales	Chromulinaceae	'Spumella-like'	Spumella-like flagellate 1006	0	0	0	0	0	0	0	0	0	0	0	0	0	0	0	0	0	0	0	0	0	0	0	0	0	0	0	0	0	0	0	0	0	0	0	0	0	0	0	0	0	0
ASV1873	Stramenopila	Heterokontophyta	Oomycetes	Pythiales	Pythiaceae	Pythium	Pythium radiosum	0	0	0	0	0	0	0	0	0	0	0	0	0	0	0	0	0	0	0	0	0	0	0	0	0	0	0	0	0	0	0	0	0	0	0	0	0	0	0	0	0	0
ASV1874	Stramenopila	Heterokontophyta	Oomycetes	Pythiales	Pythiogetonaceae	Pythiogeton	Pythiogeton uniforme	0	0	0	0	0	0	0	0	0	0	0	0	0	0	0	0	0	0	0	0	0	0	0	0	0	0	0	0	0	0	0	0	0	0	0	0	0	0	0	0	0	0
ASV1875	Metazoa	Chordata	Actinopteri	Cyprinodontiformes	Nothobranchiidae	Nothobranchius	Nothobranchius furzeri	0	0	0	0	0	0	0	0	0	0	0	0	0	0	0	0	0	0	0	0	0	0	0	0	0	0	0	0	0	0	0	0	0	0	0	0	0	0	0	0	0	0
ASV1876		Proteobacteria	Gammaproteobacteria	Vibrionales	Vibrionaceae	Aliivibrio	Aliivibrio wodanis	0	0	0	0	0	0	0	0	0	0	0	0	0	0	0	0	0	0	0	0	0	0	0	0	0	0	0	0	0	0	0	0	0	0	0	0	0	0	0	0	0	0
ASV1877	Stramenopila	Heterokontophyta	Oomycetes	Pythiales	Pythiaceae	Pythium	Pythium oligandrum	0	0	0	0	0	0	0	0	0	0	0	0	0	0	0	0	0	0	0	0	0	0	0	0	0	0	0	0	0	0	0	0	0	0	0	0	0	0	0	0	0	0
ASV1878			Dinophyceae	Prorocentrales	Prorocentraceae	Prorocentrum	Prorocentrum micans	0	0	0	0	0	0	0	0	0	0	0	0	0	0	0	0	0	0	0	0	0	0	0	0	0	0	0	0	0	0	0	0	0	0	0	0	0	0	0	0	0	0
ASV1879			Chrysophyceae	Chromulinales	Chromulinaceae	Spumella	Spumella rivalis	0	0	0	0	0	0	0	0	0	0	0	0	0	0	0	0	0	0	0	0	0	0	0	0	0	0	0	0	0	0	14	0	0	0	0	0	0	0	0	0	0	0
ASV1880	Stramenopila	Heterokontophyta	Oomycetes	Myzocytiopsidales	Myzocytiopsidaceae	Myzocytiopsis	Myzocytiopsis sp. venatrix	0	0	0	0	0	0	0	0	0	0	0	0	0	0	0	85	0	0	0	0	0	0	0	0	0	0	0	0	0	0	0	0	0	0	0	0	0	0	0	0	0	0
ASV1881	Stramenopila	Heterokontophyta	Oomycetes	Pythiales	Pythiogetonaceae	Pythiogeton	Pythiogeton uniforme	0	0	0	0	0	0	0	0	0	0	0	0	0	0	0	0	0	0	0	0	0	0	0	0	0	0	0	0	0	0	0	0	0	0	0	84	0	0	0	0	0	0
ASV1882		Apicomplexa	Aconoidasida	Haemosporida	Plasmodiidae	Plasmodium	Plasmodium falciparum	0	0	0	0	0	0	0	0	0	0	0	0	0	0	0	0	0	0	0	0	0	0	0	0	0	0	0	0	0	0	0	0	0	0	0	0	84	0	0	0	0	0
ASV1883	Metazoa	Arthropoda	Insecta	Hemiptera	Aphididae	Acyrthosiphon	Acyrthosiphon pisum	0	0	0	0	0	0	0	0	0	0	0	0	0	0	0	0	0	0	0	0	0	0	0	0	0	0	0	0	0	0	0	0	0	0	0	0	0	0	0	0	0	0
ASV1884	Stramenopila	Heterokontophyta	Oomycetes	Saprolegniales	Saprolegniaceae	Pythiopsis	Pythiopsis terrestris	0	0	0	0	0	0	0	0	0	0	0	0	0	0	0	0	0	0	0	0	0	0	0	0	0	0	0	0	0	0	0	0	0	0	0	0	0	0	0	0	0	0
ASV1885	Stramenopila	Heterokontophyta	Oomycetes	Saprolegniales	Saprolegniaceae	Saprolegnia	Saprolegnia anisospora	0	0	0	0	0	0	0	0	0	0	0	0	0	0	0	0	0	0	0	0	0	0	0	0	0	0	0	0	0	0	0	0	0	0	0	0	0	0	0	0	0	0
ASV1886			Chrysophyceae			Segregatospumella	Segregatospumella sp.	0	0	0	0	0	0	0	0	0	0	0	0	0	0	0	0	0	0	0	0	0	0	0	0	0	0	0	0	0	0	0	0	0	0	0	0	0	0	0	0	0	0
ASV1887	Stramenopila	Heterokontophyta	Oomycetes	Pythiales	Pythiaceae	Globisporangium	Globisporangium paroecandrum	0	0	0	0	0	0	0	0	0	0	0	0	0	0	0	0	0	0	0	0	0	0	0	0	0	0	0	0	0	0	0	0	0	0	0	0	0	0	0	0	0	0
ASV1888	Stramenopila	Heterokontophyta	Oomycetes	Saprolegniales	Saprolegniaceae	Plectospira	Plectospira myriandra	0	0	0	0	0	0	0	0	0	0	0	0	0	0	0	0	0	0	0	0	0	0	0	0	0	0	0	0	0	0	0	0	0	0	0	0	0	0	0	0	0	0
ASV1889	Stramenopila	Heterokontophyta	Oomycetes	Pythiales	Pythiaceae	Pythium	Pythium oligandrum	0	0	0	0	0	0	0	0	0	0	0	0	0	0	0	0	0	0	0	0	0	0	0	0	0	0	0	0	0	0	0	0	0	0	0	0	0	0	0	0	0	0
ASV1890	Stramenopila	Heterokontophyta	Oomycetes	Leptomitales		Apodachlya	Apodachlya brachynema	0	84	0	0	0	0	0	0	0	0	0	0	0	0	0	0	0	0	0	0	0	0	0	0	0	0	0	0	0	0	0	0	0	0	0	0	0	0	0	0	0	0
ASV1891			Chrysophyceae	Chromulinales	Chromulinaceae	'Spumella-like'	Spumella-like flagellate Got220	0	0	0	0	0	0	0	0	0	0	0	0	0	0	0	0	0	0	0	0	0	84	0	0	0	0	0	0	0	0	0	0	0	0	0	0	0	0	0	0	0	0
ASV1892	Metazoa	Arthropoda	Insecta	Hymenoptera	Apidae	Apis	Apis dorsata	0	0	0	0	0	0	0	0	0	0	0	0	0	0	0	0	0	0	0	0	0	0	61	0	0	0	0	0	0	23	0	0	0	0	0	0	0	0	0	0	0	0
ASV1893	Stramenopila	Heterokontophyta	Oomycetes	Pythiales	Pythiaceae	Globisporangium	Globisporangium intermedium	0	0	0	0	0	0	0	0	0	0	0	0	0	0	0	0	0	0	0	0	0	0	0	0	0	0	0	0	84	0	0	0	0	0	0	0	0	0	0	0	0	0
ASV1894	Fungi	'uncultured fungus'	'uncultured fungus'	'uncultured fungus'	'uncultured fungus'	'uncultured fungus'	uncultured fungus	0	0	0	0	0	0	0	0	0	0	0	0	0	0	0	0	0	0	0	0	0	0	0	0	0	0	0	0	0	0	0	0	0	0	0	0	0	0	0	83	0	0
ASV1895	Viridiplantae	Streptophyta	Magnoliopsida	Fabales	Fabaceae	Vigna	Vigna unguiculata	0	0	0	0	0	0	0	0	0	0	0	0	0	0	0	0	0	0	0	0	0	0	0	0	0	0	0	0	0	0	0	0	0	0	0	0	0	0	0	0	0	0
ASV1896	Stramenopila	Heterokontophyta	Oomycetes	Pythiales	Pythiaceae	Pythium	Pythium polymastum	0	0	0	0	0	0	0	0	0	0	0	0	0	0	0	0	0	0	0	0	0	0	0	0	0	0	0	0	0	0	0	0	0	0	0	0	0	0	0	0	0	0
ASV1897		'uncultured eukaryote'	'uncultured eukaryote'	'uncultured eukaryote'	'uncultured eukaryote'	'uncultured eukaryote'	uncultured eukaryote	0	0	0	0	0	0	0	0	0	0	0	0	0	0	0	0	0	0	0	0	0	0	0	0	0	0	0	0	0	0	0	0	0	0	0	0	0	0	0	0	0	0
ASV1898		Apicomplexa	Aconoidasida	Haemosporida	Plasmodiidae	Plasmodium	Plasmodium sp. gorilla clade G2	0	0	0	0	0	0	0	0	0	0	0	0	0	0	0	0	0	0	0	0	0	0	0	0	0	0	0	0	0	0	0	0	0	0	0	0	0	0	0	0	0	0
ASV1899	Fungi	'uncultured fungus'	'uncultured fungus'	'uncultured fungus'	'uncultured fungus'	'uncultured fungus'	uncultured fungus	0	0	0	0	0	0	0	0	0	0	0	0	0	0	0	0	0	0	0	0	0	0	0	0	0	0	0	0	0	0	0	0	0	0	0	0	0	0	0	0	0	0
ASV1900			Chrysophyceae	Chromulinales	Chromulinaceae	Spumella	Spumella sp.	0	0	0	0	0	0	0	0	0	0	0	0	0	0	0	0	0	0	0	0	0	0	0	0	0	0	0	0	0	0	0	0	0	0	0	0	0	0	0	0	0	0
ASV1901	Stramenopila	Heterokontophyta	Oomycetes	Pythiales	Pythiogetonaceae	Pythiogeton	Pythiogeton uniforme	0	0	0	0	0	0	0	0	0	0	0	0	0	0	0	0	0	0	0	0	0	0	19	0	0	0	0	0	0	0	0	0	0	0	0	0	0	0	0	0	0	0
ASV1902	Stramenopila	Heterokontophyta	Oomycetes	Pythiales	Pythiaceae	Pythium	Pythium salpingophorum	0	0	0	0	0	0	0	0	0	0	0	0	0	0	83	0	0	0	0	0	0	0	0	0	0	0	0	0	0	0	0	0	0	0	0	0	0	0	0	0	0	0
ASV1903	Metazoa	Chordata	Mammalia	Chiroptera	Pteropodidae	Pteropus	Pteropus alecto	0	0	0	0	0	0	0	0	0	0	0	0	0	0	0	0	0	0	0	0	0	0	83	0	0	0	0	0	0	0	0	0	0	0	0	0	0	0	0	0	0	0
ASV1904			Chrysophyceae	Chromulinales	Chromulinaceae	'Spumella-like'	Spumella-like flagellate Got220	0	0	0	0	0	0	0	0	0	0	0	0	0	0	0	0	0	0	0	0	0	0	0	0	0	0	0	0	0	0	0	0	83	0	0	0	0	0	0	0	0	0
ASV1905	Fungi	'uncultured fungus'	'uncultured fungus'	'uncultured fungus'	'uncultured fungus'	'uncultured fungus'	uncultured fungus	0	0	0	0	0	0	0	0	0	0	0	0	0	0	0	0	0	0	0	0	0	0	0	0	0	0	0	0	0	0	0	0	0	0	0	0	0	82	0	0	0	0
ASV1906	Stramenopila	Heterokontophyta	Oomycetes	Pythiales	Pythiogetonaceae	Pythiogeton	Pythiogeton uniforme	0	0	0	0	0	0	0	0	0	0	0	0	0	0	0	0	0	0	0	0	0	0	0	0	0	0	0	0	0	0	0	0	0	0	0	0	0	0	0	0	0	0
ASV1907			Chrysophyceae	Chromulinales	Chromulinaceae	Spumella	Spumella lacusvadosi	0	0	0	0	0	0	0	0	0	0	0	0	0	0	0	0	0	0	0	0	0	0	0	0	0	0	0	0	0	0	0	0	0	0	0	0	0	0	0	0	0	0
ASV1908	Metazoa	Chordata	Actinopteri	Cypriniformes	Cyprinidae	Danio	Danio rerio	0	0	0	0	0	0	0	0	0	0	0	0	0	0	0	0	0	0	0	0	0	0	0	0	0	0	0	0	0	0	0	0	0	0	0	0	0	0	0	0	0	0
ASV1909		'uncultured eukaryote'	'uncultured eukaryote'	'uncultured eukaryote'	'uncultured eukaryote'	'uncultured eukaryote'	uncultured eukaryote	0	0	0	0	0	0	0	0	0	0	0	0	0	0	0	0	0	0	0	0	0	0	0	0	0	0	0	0	0	0	0	0	0	0	0	0	0	0	0	0	0	0
ASV1910	Metazoa	Chordata	Actinopteri	Salmoniformes	Salmonidae	Salmo	Salmo trutta	0	0	0	0	0	0	0	0	0	0	0	0	0	0	0	0	0	0	0	0	0	0	0	0	0	0	0	0	0	0	0	0	0	0	0	0	0	0	0	0	0	0
ASV1911	Stramenopila	Heterokontophyta	Oomycetes	Lagenidiales	Lagenidiaceae	Lagenidium	Lagenidium sp. SL10	0	0	0	0	0	0	0	0	0	0	0	0	0	0	0	0	0	0	0	0	0	0	0	0	0	0	0	0	0	0	0	0	0	0	0	0	0	0	0	0	0	0
ASV1912	Viridiplantae	Streptophyta	Magnoliopsida	Fabales	Fabaceae	Arachis	Arachis hypogaea	0	0	0	0	0	0	0	0	0	0	0	0	0	0	0	0	0	0	0	0	0	0	0	0	0	0	0	0	0	0	0	0	0	0	0	0	0	0	0	0	0	0
ASV1913			Chrysophyceae			'Spumella-like'	Spumella-like flagellate JBNZ39	0	0	0	0	0	0	0	0	0	0	0	0	0	0	0	0	0	0	0	0	0	0	0	0	0	0	0	0	0	0	0	0	0	0	0	0	0	0	0	0	0	0
ASV1914	Stramenopila	Heterokontophyta	Oomycetes	Pythiales	Pythiaceae	Pythium	Pythium pleroticum	0	0	0	0	0	0	0	0	0	0	0	0	0	0	0	0	0	0	0	0	0	0	0	0	0	0	0	0	0	0	0	0	0	0	0	0	0	0	0	0	0	0
ASV1915		Bacillariophyta	Bacillariophyceae	Bacillariales	Bacillariaceae	Nitzschia	Nitzschia palea	0	0	0	0	0	0	0	0	0	0	0	0	0	0	0	0	0	0	0	0	0	0	0	0	0	0	0	0	0	0	0	0	0	0	0	0	0	0	0	0	0	0
ASV1916		Bacillariophyta	Bacillariophyceae	Naviculales	Naviculaceae	Navicula	Navicula trivialis	0	0	0	0	0	0	0	0	0	0	0	0	0	0	0	0	0	0	0	0	0	0	0	0	0	0	0	0	0	0	0	0	0	0	0	0	0	0	0	0	0	0
ASV1917	Metazoa	Chordata		Testudines	Testudinidae	Gopherus	Gopherus evgoodei	0	0	0	0	0	0	0	0	0	0	0	0	0	0	0	0	0	0	0	0	0	0	0	0	0	0	0	0	0	0	0	0	0	0	0	0	0	0	0	0	0	0
ASV1918		'uncultured eukaryote'	'uncultured eukaryote'	'uncultured eukaryote'	'uncultured eukaryote'	'uncultured eukaryote'	uncultured eukaryote	0	0	0	0	0	0	0	0	0	0	0	0	0	0	0	0	0	0	0	0	0	0	0	0	0	0	0	0	0	0	0	0	0	0	0	0	0	0	0	0	0	0
ASV1919	Metazoa	Chordata	Actinopteri	Kurtiformes	Apogonidae	Sphaeramia	Sphaeramia orbicularis	0	0	0	0	0	0	0	0	0	0	0	0	0	0	0	3	0	0	0	0	0	0	0	0	0	0	0	0	0	0	0	0	0	0	0	63	0	0	0	0	0	0
ASV1920		Bacillariophyta	Bacillariophyceae	Surirellales	Surirellaceae	Surirella	Surirella sp. CCAP 1071/2	0	0	0	0	0	0	0	0	82	0	0	0	0	0	0	0	0	0	0	0	0	0	0	0	0	0	0	0	0	0	0	0	0	0	0	0	0	0	0	0	0	0
ASV1921	Stramenopila	Heterokontophyta	Oomycetes	Pythiales	Pythiogetonaceae	Pythiogeton	Pythiogeton zizaniae	0	0	0	0	0	0	0	0	0	82	0	0	0	0	0	0	0	0	0	0	0	0	0	0	0	0	0	0	0	0	0	0	0	0	0	0	0	0	0	0	0	0
ASV1922	Stramenopila	Heterokontophyta	Oomycetes	Saprolegniales	Saprolegniaceae	Saprolegnia	Saprolegnia terrestris	0	0	0	0	0	0	0	0	0	0	0	0	0	0	0	0	82	0	0	0	0	0	0	0	0	0	0	0	0	0	0	0	0	0	0	0	0	0	0	0	0	0
ASV1923	Stramenopila	Heterokontophyta	Oomycetes	Pythiales	Pythiogetonaceae	Pythiogeton	Pythiogeton uniforme	0	0	0	0	0	0	0	0	0	0	0	0	0	0	0	0	0	0	0	0	0	0	0	0	0	0	0	0	0	0	0	0	0	0	0	81	0	0	0	0	0	0
ASV1924	Fungi	'uncultured fungus'	'uncultured fungus'	'uncultured fungus'	'uncultured fungus'	'uncultured fungus'	uncultured fungus	0	0	0	0	0	0	0	0	0	0	0	0	0	0	0	0	0	0	0	0	0	0	0	0	0	0	0	0	0	0	0	0	0	0	0	0	0	0	0	0	0	0
ASV1925	Stramenopila	Heterokontophyta	Oomycetes	Peronosporales	Peronosporaceae	Phytophthora	Phytophthora undulata	0	0	0	0	0	0	0	0	0	0	0	0	0	0	0	0	0	0	0	0	0	0	0	0	0	0	0	0	0	0	0	0	0	0	0	0	0	0	0	0	0	0
ASV1926	Stramenopila	Heterokontophyta	Oomycetes	Pythiales	Pythiaceae	Pythium	Pythium mamillatum	0	0	0	0	0	0	0	0	0	0	0	0	0	0	0	0	0	0	0	0	0	0	0	0	0	0	0	0	0	0	0	0	0	0	0	0	0	0	0	0	0	0
ASV1927	Stramenopila	Heterokontophyta	Oomycetes	Pythiales	Pythiaceae	Pythium	Pythium polymastum	0	0	0	0	0	0	0	0	0	0	0	0	0	0	0	0	0	0	0	0	0	0	0	0	0	0	0	0	0	0	0	0	0	0	0	0	0	0	0	0	0	0
ASV1928			Chrysophyceae	Chromulinales	Chromulinaceae	'Spumella-like'	Spumella-like flagellate 1031	0	0	0	0	0	0	0	0	0	0	0	0	0	0	0	0	0	0	0	0	0	0	0	0	0	12	0	0	0	0	0	0	0	0	0	0	0	0	0	0	0	67
ASV1929		Apicomplexa	Aconoidasida	Haemosporida	Plasmodiidae	Plasmodium	Plasmodium reichenowi	0	0	23	0	0	0	0	0	0	0	0	0	0	0	0	0	0	0	0	0	0	0	0	0	0	0	0	0	0	0	0	0	0	0	0	0	0	0	0	0	0	0
ASV1930	Stramenopila	Heterokontophyta	Oomycetes	Saprolegniales	Saprolegniaceae	Achlya	Achlya bisexualis	0	0	0	0	0	0	0	0	0	0	0	0	0	0	0	0	0	0	0	0	0	0	78	0	0	0	0	0	0	0	0	0	0	0	0	0	0	0	0	0	0	0
ASV1931			Chrysophyceae	Chromulinales	Chromulinaceae	Spumella	Spumella vulgaris	0	0	0	0	0	0	0	0	0	0	0	0	0	0	0	0	0	0	0	0	0	0	0	0	0	0	0	0	0	0	0	0	0	0	0	0	0	9	0	0	0	0
ASV1932	Fungi	'uncultured fungus'	'uncultured fungus'	'uncultured fungus'	'uncultured fungus'	'uncultured fungus'	uncultured fungus	0	0	0	0	0	0	0	0	0	0	0	0	0	0	0	0	0	0	0	0	0	0	0	0	0	0	0	0	0	0	0	0	0	0	0	0	0	0	0	0	0	0
ASV1933	Fungi	'uncultured fungus'	'uncultured fungus'	'uncultured fungus'	'uncultured fungus'	'uncultured fungus'	uncultured fungus	0	0	0	0	0	0	0	0	0	0	0	0	0	0	0	0	0	0	0	0	0	0	0	0	0	0	0	0	0	0	0	0	0	0	0	0	0	0	0	0	0	0
ASV1934	Stramenopila	Heterokontophyta	Oomycetes	Lagenidiales		Paralagenidium	Paralagenidium karlingii	0	0	0	0	0	0	0	0	0	0	0	0	0	0	0	0	0	0	0	0	0	0	0	0	0	0	0	0	0	0	0	0	0	0	0	0	0	0	0	0	0	0
ASV1935	Metazoa	Chordata	Actinopteri		Sciaenidae	Larimichthys	Larimichthys crocea	0	0	0	0	0	0	0	0	0	0	0	0	0	0	0	0	0	0	0	0	0	0	0	0	0	0	0	0	0	0	0	0	0	0	0	0	0	0	0	0	0	0
ASV1936	Stramenopila	Heterokontophyta	Oomycetes	Pythiales	Pythiogetonaceae	Pythiogeton	Pythiogeton zizaniae	0	0	0	0	0	80	0	0	0	0	0	0	0	0	0	0	0	0	0	0	0	0	0	0	0	0	0	0	0	0	0	0	0	0	0	0	0	0	0	0	0	0
ASV1937	Fungi	'uncultured fungus'	'uncultured fungus'	'uncultured fungus'	'uncultured fungus'	'uncultured fungus'	uncultured fungus	0	0	0	0	0	0	0	0	0	80	0	0	0	0	0	0	0	0	0	0	0	0	0	0	0	0	0	0	0	0	0	0	0	0	0	0	0	0	0	0	0	0
ASV1938	Metazoa	Chordata	Mammalia	Artiodactyla	Bovidae	Ovis	Ovis canadensis	0	0	0	0	0	0	0	0	0	0	0	0	0	0	0	0	0	0	0	0	0	80	0	0	0	0	0	0	0	0	0	0	0	0	0	0	0	0	0	0	0	0
ASV1939	Metazoa	Chordata	Mammalia	Primates	Hominidae	Homo	Homo sapiens	0	0	0	0	0	0	0	0	0	0	0	0	0	0	0	0	0	0	0	0	0	0	0	0	0	0	0	0	0	0	0	0	80	0	0	0	0	0	0	0	0	0
ASV1940		'uncultured eukaryote'	'uncultured eukaryote'	'uncultured eukaryote'	'uncultured eukaryote'	'uncultured eukaryote'	uncultured eukaryote	0	0	0	0	0	0	0	0	0	0	0	0	0	0	0	0	0	0	0	0	0	0	0	0	0	0	0	0	0	0	0	0	0	0	0	52	0	0	0	0	0	0
ASV1941	Stramenopila	Heterokontophyta	Oomycetes	Pythiales	Pythiaceae	Pythium	Pythium oligandrum	0	0	0	0	0	0	0	0	0	0	0	0	0	0	0	0	0	0	0	0	0	0	0	0	0	0	0	0	0	0	0	0	0	0	0	0	0	23	0	0	0	0
ASV1942		'uncultured eukaryote'	'uncultured eukaryote'	'uncultured eukaryote'	'uncultured eukaryote'	'uncultured eukaryote'	uncultured eukaryote	0	0	0	0	0	0	0	0	0	0	0	0	0	0	0	0	0	0	0	0	0	0	0	0	0	0	0	0	0	0	0	0	0	0	0	0	0	0	0	45	0	0
ASV1943	Fungi	'uncultured fungus'	'uncultured fungus'	'uncultured fungus'	'uncultured fungus'	'uncultured fungus'	uncultured fungus	0	0	0	0	0	0	0	0	0	0	0	0	0	0	0	0	0	0	0	0	0	0	0	0	0	0	0	0	0	0	0	0	0	0	0	0	0	0	0	44	0	0
ASV1944			Chrysophyceae	Chromulinales	Chromulinaceae	'Spumella-like'	Spumella-like flagellate 194f	0	0	0	0	0	0	0	0	0	0	0	0	0	0	0	0	0	0	0	0	0	0	0	0	0	0	0	0	0	0	0	0	0	0	0	0	0	0	0	0	0	0
ASV1945	Stramenopila	Heterokontophyta	Oomycetes	Pythiales	Pythiaceae	Globisporangium	Globisporangium intermedium	0	0	0	0	0	0	0	0	0	0	0	0	0	0	0	0	0	0	0	0	0	0	0	0	0	0	0	0	0	0	0	0	0	0	0	0	0	0	0	0	0	0
ASV1946			Chrysophyceae			Segregatospumella	Segregatospumella sp.	0	0	0	0	0	0	0	0	0	0	0	0	0	0	0	0	0	0	0	0	0	0	0	0	0	0	0	0	0	0	0	0	0	0	0	0	0	0	0	0	0	0
ASV1947	Stramenopila	Heterokontophyta	Oomycetes	Peronosporales	Peronosporaceae	Hyaloperonospora	Hyaloperonospora barbareae	0	0	0	0	0	0	0	0	0	0	0	0	0	0	0	0	0	0	0	0	0	0	0	0	0	0	0	0	0	0	0	0	0	0	0	0	0	0	0	0	0	0
ASV1948		Ciliophora	Oligohymenophorea	Hymenostomatida	Tetrahymenidae	Tetrahymena	Tetrahymena thermophila	0	0	0	0	0	0	0	0	0	0	0	0	0	0	0	0	0	0	0	0	0	0	0	0	0	0	0	0	0	0	0	0	0	0	0	0	0	0	0	0	0	0
ASV1949	Fungi	'uncultured fungus'	'uncultured fungus'	'uncultured fungus'	'uncultured fungus'	'uncultured fungus'	uncultured fungus	0	0	0	0	0	0	0	0	0	0	0	0	0	0	0	0	0	0	0	0	0	0	0	0	0	0	0	0	0	0	0	0	0	0	0	0	0	0	0	0	0	0
ASV1950	Stramenopila	Heterokontophyta	Oomycetes	Pythiales	Pythiaceae	Pythium	Pythium monospermum	0	0	0	0	0	0	0	0	0	0	0	0	0	0	0	0	0	0	0	0	0	0	0	0	0	0	0	0	0	0	0	0	0	0	0	0	0	0	0	0	0	0
ASV1951	Fungi	Ascomycota	Dothideomycetes	Pleosporales	Leptosphaeriaceae	Leptosphaeria	Leptosphaeria biglobosa	0	0	0	0	0	0	0	0	0	0	0	0	0	0	0	0	0	0	0	0	0	0	0	0	0	0	0	0	0	0	0	0	0	0	0	0	0	0	0	0	0	0
ASV1952		Proteobacteria	Gammaproteobacteria	Xanthomonadales	Rhodanobacteraceae	Rhodanobacter	Rhodanobacter denitrificans	0	0	0	0	0	0	0	0	0	0	0	0	0	0	0	0	0	0	0	0	0	0	0	0	0	0	0	0	0	0	0	0	0	0	0	0	0	0	0	0	0	0
ASV1953			Chrysophyceae	Chromulinales	Chromulinaceae	'Spumella-like'	Spumella-like flagellate 194f	0	31	0	0	0	0	0	0	0	0	0	0	0	0	0	0	0	0	0	0	0	0	0	0	0	0	0	0	0	0	0	0	0	0	0	0	0	0	0	0	0	0
ASV1954	Stramenopila	Heterokontophyta	Oomycetes	Pythiales	Pythiaceae	Pythium	Pythium alternatum	0	0	0	0	0	0	0	0	0	0	0	0	0	0	0	0	0	0	0	79	0	0	0	0	0	0	0	0	0	0	0	0	0	0	0	0	0	0	0	0	0	0
ASV1955	Metazoa	Chordata	Aves	Accipitriformes	Accipitridae	Aquila	Aquila chrysaetos	0	0	0	0	0	0	0	0	0	0	0	0	0	0	0	0	0	0	0	0	0	0	0	0	0	0	79	0	0	0	0	0	0	0	0	0	0	0	0	0	0	0
ASV1956								0	0	0	0	0	0	0	0	0	0	0	0	0	0	0	0	0	0	0	0	0	0	0	0	0	0	0	0	0	79	0	0	0	0	0	0	0	0	0	0	0	0
ASV1957	Viridiplantae	Streptophyta	Magnoliopsida	Malvales	Malvaceae	Theobroma	Theobroma cacao	0	0	0	0	0	0	0	0	0	0	0	0	0	0	0	0	0	0	0	0	0	0	0	0	0	0	0	0	0	0	0	0	0	0	0	78	0	0	0	0	0	0
ASV1958			Dinophyceae	Prorocentrales	Prorocentraceae	Prorocentrum	Prorocentrum micans	0	0	0	0	0	0	0	0	0	0	0	0	0	0	0	0	0	0	0	0	0	0	0	0	0	0	0	0	0	0	0	0	0	0	0	0	0	0	0	0	0	0
ASV1959	Fungi	Ascomycota	Saccharomycetes	Saccharomycetales	Debaryomycetaceae	Debaryomyces	Debaryomyces hansenii	0	0	0	0	0	0	0	0	0	0	0	0	0	0	0	0	0	0	0	0	0	0	0	0	0	0	0	0	0	0	0	0	0	0	0	0	0	0	0	0	0	0
ASV1960	Viridiplantae	Streptophyta	Magnoliopsida	Solanales	Convolvulaceae	Ipomoea	Ipomoea triloba	0	0	0	0	0	0	0	0	0	0	0	0	0	0	0	0	0	0	0	0	0	0	0	0	0	0	0	0	0	0	0	0	0	0	0	0	0	0	0	0	0	0
ASV1961		'uncultured eukaryote'	'uncultured eukaryote'	'uncultured eukaryote'	'uncultured eukaryote'	'uncultured eukaryote'	uncultured eukaryote	0	0	0	0	0	0	0	78	0	0	0	0	0	0	0	0	0	0	0	0	0	0	0	0	0	0	0	0	0	0	0	0	0	0	0	0	0	0	0	0	0	0
ASV1962			Chrysophyceae			Segregatospumella	Segregatospumella sp.	0	0	0	0	0	0	0	0	0	0	0	0	0	0	0	0	0	0	0	0	0	0	0	0	0	78	0	0	0	0	0	0	0	0	0	0	0	0	0	0	0	0
ASV1963	Fungi	'uncultured fungus'	'uncultured fungus'	'uncultured fungus'	'uncultured fungus'	'uncultured fungus'	uncultured fungus	0	0	0	0	0	0	0	0	0	0	0	0	0	0	0	0	0	0	0	0	0	0	0	0	0	0	0	0	0	0	0	0	0	0	0	0	77	0	0	0	0	0
ASV1964		Proteobacteria	Betaproteobacteria	Neisseriales	Neisseriaceae	Neisseria	Neisseria weaveri	0	0	0	0	0	0	0	0	0	0	0	0	0	0	0	0	0	0	0	0	0	0	0	0	0	0	0	0	0	0	0	0	0	0	0	0	0	0	0	0	0	0
ASV1965		Proteobacteria	Gammaproteobacteria	Vibrionales	Vibrionaceae	Aliivibrio	Aliivibrio wodanis	0	0	0	0	0	0	0	0	0	0	0	0	0	0	0	0	0	0	0	0	0	0	0	0	0	0	0	0	0	0	0	0	0	0	0	0	0	0	0	0	0	0
ASV1966	Fungi	'uncultured fungus'	'uncultured fungus'	'uncultured fungus'	'uncultured fungus'	'uncultured fungus'	uncultured fungus	0	0	0	0	0	0	0	0	0	0	0	0	0	0	0	0	0	0	0	0	0	0	0	0	0	0	0	0	0	0	0	0	0	0	0	0	0	0	0	0	0	0
ASV1967	Fungi	'uncultured fungus'	'uncultured fungus'	'uncultured fungus'	'uncultured fungus'	'uncultured fungus'	uncultured fungus	0	0	0	0	0	0	0	0	0	0	0	0	0	0	0	0	0	0	0	0	0	0	0	0	0	0	0	0	0	0	0	0	0	0	0	0	0	0	0	0	0	0
ASV1968			Chrysophyceae	Chromulinales	Chromulinaceae	'Spumella-like'	Spumella-like flagellate 194f	0	0	0	0	0	0	0	0	0	0	0	0	0	0	0	0	0	0	0	0	0	0	0	0	0	0	0	0	0	0	0	0	0	0	0	0	0	0	0	0	0	0
ASV1969	Fungi	'uncultured fungus'	'uncultured fungus'	'uncultured fungus'	'uncultured fungus'	'uncultured fungus'	uncultured fungus	0	0	0	0	0	0	0	0	0	0	0	0	0	0	0	0	0	0	0	0	0	0	0	0	0	0	0	0	0	0	0	0	0	0	0	0	0	0	0	0	0	0
ASV1970	Stramenopila	Heterokontophyta	Oomycetes	Pythiales	Pythiaceae	Pythium	Pythium heterothallicum	0	0	0	0	0	0	0	0	0	0	0	0	0	0	0	0	0	0	0	0	0	0	0	0	0	0	0	0	0	0	0	0	0	0	0	0	0	0	0	0	0	0
ASV1971		Apicomplexa	Aconoidasida	Haemosporida	Plasmodiidae	Plasmodium	Plasmodium malariae	0	0	0	0	0	0	0	0	0	0	0	0	0	0	0	0	0	0	0	0	0	0	0	0	0	0	0	0	0	0	0	0	0	0	0	0	0	0	0	0	0	0
ASV1972	Stramenopila	Heterokontophyta	Oomycetes	Pythiales	Pythiogetonaceae	Pythiogeton	Pythiogeton uniforme	0	0	0	0	0	0	0	0	0	0	0	0	0	0	0	0	0	0	0	0	0	0	0	0	0	0	0	0	0	0	0	0	0	0	0	0	0	0	0	0	0	0
ASV1973			Chrysophyceae	Chromulinales	Chromulinaceae	'Spumella-like'	Spumella-like flagellate Got220	0	0	0	0	0	0	0	0	0	0	0	0	0	0	0	0	0	0	0	0	0	0	0	0	0	0	0	0	0	0	0	0	0	0	0	0	0	0	0	0	0	0
ASV1974	Stramenopila	Heterokontophyta	Oomycetes	Saprolegniales	Saprolegniaceae	Achlya	Achlya bisexualis	0	0	0	0	0	0	0	0	0	0	0	0	0	0	0	0	0	0	0	0	0	0	0	0	0	0	0	0	0	0	0	0	0	0	0	0	0	0	0	0	0	0
ASV1975	Metazoa	Chordata		Testudines	Testudinidae	Gopherus	Gopherus evgoodei	0	0	0	0	0	0	0	0	0	0	0	0	0	0	0	0	0	0	0	0	0	0	0	0	0	0	0	0	0	0	0	0	0	0	0	0	0	0	0	0	0	0
ASV1976	Metazoa	Chordata	Actinopteri		Ambassidae	Parambassis	Parambassis ranga	0	0	0	0	0	0	0	0	0	0	0	0	0	0	0	0	0	0	0	0	0	0	0	0	0	0	0	0	0	0	0	0	0	0	0	0	0	0	0	0	0	0
ASV1977	Viridiplantae	Streptophyta	Magnoliopsida	Fabales	Fabaceae	Vigna	Vigna angularis	0	0	0	0	0	0	0	0	0	0	0	0	0	0	0	0	0	0	0	0	0	0	0	0	0	0	0	0	0	0	0	0	0	0	0	0	0	0	0	0	0	0
ASV1978	Stramenopila	Heterokontophyta	Oomycetes	Peronosporales	Peronosporaceae	Hyaloperonospora	Hyaloperonospora cochleariae	0	0	0	0	0	0	0	0	0	0	0	0	0	0	0	0	0	0	0	0	0	0	0	0	0	0	0	0	0	0	0	0	50	0	0	0	0	0	0	0	0	0
ASV1979	Fungi	'uncultured fungus'	'uncultured fungus'	'uncultured fungus'	'uncultured fungus'	'uncultured fungus'	uncultured fungus	11	0	0	0	0	0	0	0	0	0	0	0	0	0	0	0	0	0	0	42	0	0	0	0	0	0	0	0	0	0	0	0	0	0	0	0	0	0	0	0	0	0
ASV1980	Stramenopila	Heterokontophyta	Oomycetes				Oomycetes sp. NF-4	77	0	0	0	0	0	0	0	0	0	0	0	0	0	0	0	0	0	0	0	0	0	0	0	0	0	0	0	0	0	0	0	0	0	0	0	0	0	0	0	0	0
ASV1981	Stramenopila	Heterokontophyta	Oomycetes		Lagenaceae	Lagena	Lagena radicicola	0	0	0	0	0	37	40	0	0	0	0	0	0	0	0	0	0	0	0	0	0	0	0	0	0	0	0	0	0	0	0	0	0	0	0	0	0	0	0	0	0	0
ASV1982	Stramenopila	Heterokontophyta	Oomycetes	Pythiales	Pythiogetonaceae	Pythiogeton	Pythiogeton uniforme	0	0	0	0	0	0	0	0	0	0	0	0	0	0	0	0	0	0	0	0	0	0	0	0	0	0	0	0	0	0	0	0	0	0	0	76	0	0	0	0	0	0
ASV1983	Metazoa	Chordata	Mammalia	Primates	Cercopithecidae	Chlorocebus	Chlorocebus aethiops	0	0	0	0	0	0	0	0	0	0	0	0	0	0	0	0	0	0	0	0	0	0	0	0	0	0	0	0	0	0	0	0	0	0	0	0	0	0	0	0	0	0
ASV1984	Fungi	'uncultured fungus'	'uncultured fungus'	'uncultured fungus'	'uncultured fungus'	'uncultured fungus'	uncultured fungus	0	0	0	0	0	0	0	0	0	0	0	0	0	0	0	0	0	0	0	0	0	0	0	0	0	0	0	0	0	0	0	0	0	0	0	0	0	0	0	0	0	0
ASV1985	Stramenopila	Heterokontophyta	Oomycetes	Lagenidiales	Lagenidiaceae	Lagenidium	Lagenidium sp. SLG-2014b	0	0	0	0	0	0	0	0	0	0	0	0	0	0	0	0	0	0	0	0	0	0	0	0	0	0	0	0	0	0	0	0	0	0	0	0	0	0	0	0	0	0
ASV1986	Fungi	'uncultured fungus'	'uncultured fungus'	'uncultured fungus'	'uncultured fungus'	'uncultured fungus'	uncultured fungus	0	0	0	0	0	0	0	0	0	0	0	0	0	0	0	0	0	0	0	0	0	0	0	0	0	0	0	0	0	0	0	0	0	0	0	0	0	0	0	0	0	0
ASV1987	Metazoa	Chordata	Aves	Accipitriformes	Accipitridae	Aquila	Aquila chrysaetos	0	0	0	0	0	0	0	0	0	0	0	0	0	0	0	0	0	0	0	0	0	0	0	0	0	0	0	0	0	0	0	0	0	0	0	0	0	0	0	0	0	0
ASV1988	Fungi	'uncultured fungus'	'uncultured fungus'	'uncultured fungus'	'uncultured fungus'	'uncultured fungus'	uncultured fungus	0	0	0	0	0	0	0	0	0	0	0	0	0	0	0	0	0	0	0	0	0	0	0	0	0	0	0	0	0	0	0	0	0	0	0	0	0	0	0	0	0	0
ASV1989	Stramenopila	Heterokontophyta	Oomycetes	Pythiales	Pythiaceae	Pythium	Pythium sylvaticum	0	0	0	0	0	0	0	0	0	0	0	0	0	0	0	0	0	0	0	0	0	0	0	0	0	0	0	0	0	0	0	0	0	0	0	0	0	0	0	0	0	0
ASV1990			Chrysophyceae	Chromulinales	Chromulinaceae	Spumella	Spumella sp.	0	0	0	0	0	0	0	0	0	0	0	0	0	0	0	0	0	0	0	0	0	0	0	0	0	0	0	0	0	0	0	0	0	0	0	0	0	0	0	0	0	0
ASV1991	Stramenopila	Heterokontophyta	Oomycetes	Pythiales	Pythiaceae	Pythium	Pythium irregulare	0	0	0	0	0	0	0	9	0	0	0	0	0	0	0	0	0	0	0	0	0	0	0	0	0	0	0	0	0	0	0	0	0	0	0	0	0	0	0	0	0	0
ASV1992	Viridiplantae	Streptophyta	Magnoliopsida	Malvales	Malvaceae	Gossypium	Gossypium raimondii	0	0	0	0	0	0	0	0	0	0	0	0	0	76	0	0	0	0	0	0	0	0	0	0	0	0	0	0	0	0	0	0	0	0	0	0	0	0	0	0	0	0
ASV1993	Stramenopila	Heterokontophyta	Oomycetes	Pythiales	Pythiogetonaceae	Pythiogeton	Pythiogeton uniforme	0	0	0	0	0	0	0	0	0	0	0	0	0	0	0	0	24	0	0	0	0	0	52	0	0	0	0	0	0	0	0	0	0	0	0	0	0	0	0	0	0	0
ASV1994			Chrysophyceae	Chromulinales	Chromulinaceae	'Spumella-like'	Spumella-like flagellate 1006	0	0	0	0	0	0	0	0	0	0	0	0	0	0	0	0	0	0	0	0	0	0	0	0	0	76	0	0	0	0	0	0	0	0	0	0	0	0	0	0	0	0
ASV1995			Chrysophyceae	Chromulinales	Chromulinaceae	'Spumella-like'	Spumella-like flagellate 1006	0	0	0	0	0	0	0	0	0	0	0	0	0	0	0	0	0	0	0	0	0	0	0	0	0	0	0	0	0	0	0	0	0	0	0	0	0	0	0	0	0	0
ASV1996	Stramenopila	Heterokontophyta	Oomycetes	Pythiales	Pythiaceae	Pythium	Pythium irregulare	0	0	0	0	0	0	0	0	0	0	0	0	0	0	0	0	0	0	0	0	0	0	0	0	0	0	0	0	0	0	0	0	0	0	0	0	0	0	0	0	0	0
ASV1997	Stramenopila	Heterokontophyta	Oomycetes	Pythiales	Pythiaceae	Pythium	Pythium bifurcatum	0	0	0	0	0	0	0	0	0	0	0	0	0	0	0	0	0	0	0	0	0	0	0	0	0	0	0	0	0	0	0	0	0	0	0	0	0	0	0	0	0	0
ASV1998		'uncultured eukaryote'	'uncultured eukaryote'	'uncultured eukaryote'	'uncultured eukaryote'	'uncultured eukaryote'	uncultured eukaryote	0	0	0	0	0	0	0	0	0	0	0	0	0	0	0	0	0	0	0	0	0	0	0	0	0	0	0	0	0	0	0	0	0	0	0	0	0	0	0	0	0	0
ASV1999	Viridiplantae	Streptophyta	Magnoliopsida	Fabales	Fabaceae	Lupinus	Lupinus angustifolius	0	0	0	0	0	0	0	0	0	0	0	0	0	0	0	0	0	0	0	0	0	0	0	0	0	0	0	0	0	0	0	0	0	0	0	0	0	0	0	0	0	0
ASV2000	Stramenopila	Heterokontophyta	Oomycetes	Pythiales	Pythiaceae	Pythium	Pythium sylvaticum	0	0	0	0	0	0	0	0	0	0	0	0	0	0	0	0	0	0	0	0	0	0	0	0	0	0	0	0	0	0	0	0	0	0	0	0	0	0	0	0	0	0
ASV2001	Fungi	'uncultured fungus'	'uncultured fungus'	'uncultured fungus'	'uncultured fungus'	'uncultured fungus'	uncultured fungus	0	0	0	0	0	0	0	0	0	0	0	0	0	0	0	0	0	0	0	0	15	0	0	0	0	0	0	0	0	0	0	0	0	0	0	0	0	0	0	0	11	0
ASV2002	Viridiplantae	Streptophyta	Magnoliopsida	Poales	Poaceae	Setaria	Setaria italica	0	0	0	0	0	0	0	0	0	0	0	0	0	0	0	0	0	0	0	0	0	0	0	0	0	0	0	0	0	43	0	0	0	0	0	0	0	0	0	0	0	0
ASV2003	Stramenopila	Heterokontophyta	Oomycetes	Peronosporales	Peronosporaceae	Hyaloperonospora	Hyaloperonospora cochleariae	0	0	0	0	0	0	0	0	0	0	0	0	0	49	0	0	0	0	0	0	0	0	0	0	0	0	0	0	0	0	0	0	0	0	0	0	0	0	0	0	0	0
ASV2004	Stramenopila	Heterokontophyta	Oomycetes	Pythiales	Pythiaceae	Pythium	Pythium grandisporangium	57	0	0	0	18	0	0	0	0	0	0	0	0	0	0	0	0	0	0	0	0	0	0	0	0	0	0	0	0	0	0	0	0	0	0	0	0	0	0	0	0	0
ASV2005			Chrysophyceae	Chromulinales	Chromulinaceae	'Spumella-like'	Spumella-like flagellate 391f	0	0	0	0	0	0	0	0	0	0	0	0	0	0	0	0	75	0	0	0	0	0	0	0	0	0	0	0	0	0	0	0	0	0	0	0	0	0	0	0	0	0
ASV2006	Viridiplantae	Streptophyta	Magnoliopsida	Malpighiales	Salicaceae	Populus	Populus balsamifera	0	0	0	0	0	0	0	0	0	0	0	0	0	0	0	0	0	0	0	0	0	67	8	0	0	0	0	0	0	0	0	0	0	0	0	0	0	0	0	0	0	0
ASV2007	Fungi	'uncultured fungus'	'uncultured fungus'	'uncultured fungus'	'uncultured fungus'	'uncultured fungus'	uncultured fungus	0	0	0	0	0	0	0	0	0	0	0	0	0	0	0	0	0	0	0	0	0	0	75	0	0	0	0	0	0	0	0	0	0	0	0	0	0	0	0	0	0	0
ASV2009	Stramenopila	Heterokontophyta	Oomycetes	Pythiales	Pythiaceae	Pythium	Pythium sp. CAL-2011f	0	0	0	0	0	0	0	0	0	0	0	0	0	0	0	0	0	0	0	0	0	0	0	0	0	0	0	0	0	0	0	75	0	0	0	0	0	0	0	0	0	0
ASV2010	Metazoa	Chordata	Actinopteri	Osteoglossiformes	Osteoglossidae	Scleropages	Scleropages formosus	0	0	0	0	0	0	0	0	0	0	0	0	0	0	0	0	0	0	0	0	0	0	0	0	0	0	0	0	0	0	0	75	0	0	0	0	0	0	0	0	0	0
ASV2011	Stramenopila	Heterokontophyta	Oomycetes	Saprolegniales	Saprolegniaceae	Saprolegnia	Saprolegnia sp. SAP4	0	0	0	0	0	0	0	0	0	0	0	0	0	0	0	0	0	0	0	0	0	0	0	0	0	0	0	0	0	0	0	0	0	0	0	0	0	0	0	0	0	0
ASV2012			Chrysophyceae			Segregatospumella	Segregatospumella sp.	0	0	0	0	0	0	0	0	0	0	0	0	0	0	0	0	0	0	0	0	0	0	0	0	0	0	0	0	0	0	0	0	0	0	0	0	0	0	0	0	0	0
ASV2013	Stramenopila	Heterokontophyta	Oomycetes	Peronosporales	Peronosporaceae	Hyaloperonospora	Hyaloperonospora barbareae	0	0	0	0	0	0	0	0	0	0	0	0	0	0	0	0	0	0	0	0	0	0	0	0	0	0	0	0	0	0	0	0	0	0	0	0	0	0	0	0	0	0
ASV2014			Chrysophyceae	Chromulinales	Chromulinaceae	'Spumella-like'	Spumella-like flagellate 1031	0	0	0	0	0	0	0	0	0	0	0	0	0	0	0	0	0	0	0	0	0	0	0	0	0	0	0	0	0	0	0	0	0	0	0	0	0	0	0	0	0	0
ASV2015			Chrysophyceae	Chromulinales	Chromulinaceae	Spumella	Spumella sp.	0	0	0	0	0	0	0	0	0	0	0	0	0	0	0	0	0	0	0	0	0	0	0	0	0	0	0	0	0	0	0	0	0	0	0	0	0	0	0	0	0	0
ASV2016	Stramenopila	Heterokontophyta	Oomycetes	Pythiales	Pythiaceae	Pythium	Pythium heterothallicum	0	0	0	0	0	0	0	0	0	0	0	0	0	0	0	0	0	0	0	0	0	0	0	0	0	0	0	0	0	0	0	0	0	0	0	0	0	0	0	0	0	0
ASV2017	Metazoa	Chordata	Actinopteri	Cypriniformes	Cyprinidae	Danio	Danio rerio	0	0	0	0	0	0	0	0	0	0	0	0	0	0	0	0	0	0	0	0	0	0	0	0	0	0	0	0	0	0	0	0	0	0	0	0	0	0	0	0	0	0
ASV2018	Viridiplantae	Streptophyta	Magnoliopsida	Malvales	Malvaceae	Theobroma	Theobroma cacao	0	0	0	0	0	0	0	0	0	0	0	0	0	0	0	0	0	0	0	0	0	0	0	0	0	0	0	0	0	0	0	0	0	0	0	0	0	0	0	0	0	0
ASV2019	Stramenopila	Heterokontophyta	Oomycetes	Pythiales	Pythiaceae	Pythium	Pythium jasmonium	0	0	0	0	0	0	0	0	0	0	0	0	0	0	0	0	0	0	0	0	0	0	0	0	3	0	0	0	0	0	0	0	0	0	0	0	0	35	0	0	0	5
ASV2020		Bacillariophyta	Bacillariophyceae	Bacillariales	Bacillariaceae	Nitzschia	Nitzschia palea	0	0	19	0	0	0	0	0	0	0	0	0	0	0	0	0	0	0	0	0	0	0	0	0	0	0	0	0	0	0	0	0	0	0	0	0	0	0	0	0	0	0
ASV2021	Fungi	'uncultured fungus'	'uncultured fungus'	'uncultured fungus'	'uncultured fungus'	'uncultured fungus'	uncultured fungus	0	0	0	0	0	0	0	74	0	0	0	0	0	0	0	0	0	0	0	0	0	0	0	0	0	0	0	0	0	0	0	0	0	0	0	0	0	0	0	0	0	0
ASV2022		Bacillariophyta	Bacillariophyceae	Naviculales	Naviculaceae	Navicula	Navicula trivialis	0	0	0	0	0	0	0	0	74	0	0	0	0	0	0	0	0	0	0	0	0	0	0	0	0	0	0	0	0	0	0	0	0	0	0	0	0	0	0	0	0	0
ASV2023	Stramenopila	Heterokontophyta	Oomycetes	Myzocytiopsidales	Myzocytiopsidaceae	Myzocytiopsis	Myzocytiopsis sp. venatrix	0	0	0	0	0	0	0	0	0	0	0	0	0	0	0	74	0	0	0	0	0	0	0	0	0	0	0	0	0	0	0	0	0	0	0	0	0	0	0	0	0	0
ASV2024			Synurophyceae	Ochromonadales	Ochromonadaceae	Poterioochromonas	Poterioochromonas stipitata	0	0	0	0	0	0	0	0	0	0	0	0	0	0	0	0	0	0	0	0	0	0	0	0	0	0	0	0	0	0	0	0	0	0	0	22	51	0	0	0	0	0
ASV2025	Stramenopila	Heterokontophyta	Oomycetes	Pythiales	Pythiaceae	Pythium	Pythium monospermum	0	0	0	0	0	0	0	0	0	0	0	0	0	0	0	0	0	0	0	0	0	0	0	0	0	0	0	0	0	0	0	0	0	0	0	0	0	0	0	0	0	0
ASV2026	Stramenopila	Heterokontophyta	Oomycetes	Pythiales	Pythiogetonaceae	Pythiogeton	Pythiogeton uniforme	0	0	0	0	0	0	0	0	0	0	0	0	0	0	0	0	0	0	0	0	0	0	0	0	0	0	0	0	0	0	0	0	0	0	0	0	0	0	0	0	0	0
ASV2027		'uncultured eukaryote'	'uncultured eukaryote'	'uncultured eukaryote'	'uncultured eukaryote'	'uncultured eukaryote'	uncultured eukaryote	0	0	0	0	0	0	0	0	0	0	0	0	0	0	0	0	0	0	0	0	0	0	0	0	0	0	0	0	0	0	0	0	0	0	0	0	0	0	0	0	0	0
ASV2028			Dinophyceae	Prorocentrales	Prorocentraceae	Prorocentrum	Prorocentrum micans	0	0	0	0	0	0	0	0	0	0	0	0	0	0	0	0	0	0	0	0	0	0	0	0	0	0	0	0	0	0	0	0	0	0	0	0	0	0	0	0	0	0
ASV2029		Bacillariophyta	Bacillariophyceae	Bacillariales	Bacillariaceae	Nitzschia	Nitzschia palea	0	0	0	0	0	0	0	0	0	0	0	0	0	0	0	0	0	0	0	0	0	0	0	0	0	0	0	0	0	0	0	0	0	0	0	0	0	0	0	0	0	0
[truncated: 3,196 more rows]
[truncated: 80 more columns]
